# Supplementary material for: The evolutionary signal in metagenome phyletic profiles predicts many gene functions
Source: Microbiome. 2018 Jul 10;6:129. doi: 10.1186/s40168-018-0506-4 (PMC6040064; doi:10.1186/s40168-018-0506-4)
Supplement: Supplementary file 2 — Accuracy of MPP-H, MPP-O, and MPP-I classification models, as the AUPRC score (using out-of-bag estimates provided by Random Forest) for individual GO terms. Next to each AUPRC score, the table lists the number of COG/NOG gene families for which that GO term is predicted at Pr thresholds of ≥ 10% (least stringent), ≥ 30%, ≥ 50%, ≥ 70% and ≥ 90% (most stringent). (XLSX 298 kb) [file 40168_2018_506_MOESM2_ESM.xlsx]

## Sheet: MPP-I__all_predictions
		# of gene families for which a GO term is predicted at Precision≥X%
GO term	AUPRC	0.1	0.3	0.5	0.7	0.9	Description	Highlighted in paper
GO:0003954	0.3925	127	42	23	15	10	NADH dehydrogenase activity	1
GO:0004812	0.262	192	61	29	20	10	aminoacyl-tRNA ligase activity	1		total COG/NOG gene families analyzed in MPP-I
GO:0006520	0.3159	1965	349	171	76	25	cellular amino acid metabolic process	1		3536
GO:0051540	0.1489	1090	80	31	3	1	metal cluster binding	1
GO:0000049	0.1631	103	1	0	0	0	tRNA binding	0
GO:0000104	0.1376	17	6	3	2	2	succinate dehydrogenase activity	0
GO:0000105	0.27	71	16	9	4	3	histidine biosynthetic process	0
GO:0000107	0.2062	9	0	0	0	0	imidazoleglycerol-phosphate synthase activity	0
GO:0000155	0.0376	173	19	4	2	2	phosphorelay sensor kinase activity	0
GO:0000156	0.0241	91	3	0	0	0	phosphorelay response regulator activity	0
GO:0000160	0.0574	341	83	16	4	1	phosphorelay signal transduction system	0
GO:0000162	0.1815	13	0	0	0	0	tryptophan biosynthetic process	0
GO:0000166	0.2589	4631	1208	314	105	21	nucleotide binding	0
GO:0000255	0.0914	8	0	0	0	0	allantoin metabolic process	0
GO:0000256	0.1073	6	0	0	0	0	allantoin catabolic process	0
GO:0000270	0.127	99	26	16	7	2	peptidoglycan metabolic process	0
GO:0000271	0.0689	161	29	2	1	1	polysaccharide biosynthetic process	0
GO:0000287	0.0597	134	0	0	0	0	magnesium ion binding	0
GO:0000413	0.033	11	2	1	0	0	protein peptidyl-prolyl isomerization	0
GO:0000502	0.2185	20	1	0	0	0	proteasome complex	0
GO:0000902	0.2292	119	23	16	10	3	cell morphogenesis	0
GO:0000910	0.0181	9	2	1	0	0	cytokinesis	0
GO:0000917	0.0256	6	2	1	0	0	barrier septum assembly	0
GO:0001071	0.0309	235	46	23	7	4	nucleic acid binding transcription factor activity	0
GO:0001514	0.1156	19	4	3	0	0	selenocysteine incorporation	0
GO:0001539	0.3951	223	66	37	15	0	ciliary or bacterial-type flagellar motility	0
GO:0001882	0.2448	4631	968	262	99	17	nucleoside binding	0
GO:0001883	0.2419	4631	938	260	87	20	purine nucleoside binding	0
GO:0002161	0.2326	29	9	5	1	0	aminoacyl-tRNA editing activity	0
GO:0002252	0.3292	252	89	57	24	7	immune effector process	0
GO:0002376	0.3046	252	89	57	24	7	immune system process	0
GO:0003333	0.0575	1	0	0	0	0	amino acid transmembrane transport	0
GO:0003676	0.1934	4631	1312	389	114	16	nucleic acid binding	0
GO:0003677	0.1174	3820	505	143	6	4	DNA binding	0
GO:0003678	0.0571	7	0	0	0	0	DNA helicase activity	0
GO:0003697	0.0225	2	0	0	0	0	single-stranded DNA binding	0
GO:0003700	0.0302	228	46	23	7	4	sequence-specific DNA binding transcription factor activity	0
GO:0003723	0.2262	1191	231	87	48	17	RNA binding	0
GO:0003735	0.2544	680	197	110	72	50	structural constituent of ribosome	0
GO:0003755	0.033	11	2	1	0	0	peptidyl-prolyl cis-trans isomerase activity	0
GO:0003774	0.3372	140	43	22	2	0	motor activity	0
GO:0003824	0.7083	4631	4631	4631	3814	957	catalytic activity	0
GO:0003899	0.0548	19	3	1	0	0	DNA-directed RNA polymerase activity	0
GO:0003916	0.129	62	1	0	0	0	DNA topoisomerase activity	0
GO:0003918	0.2769	58	8	0	0	0	DNA topoisomerase type II (ATP-hydrolyzing) activity	0
GO:0003924	0.0705	21	0	0	0	0	GTPase activity	0
GO:0003989	0.0555	20	5	4	2	2	acetyl-CoA carboxylase activity	0
GO:0004129	0.1503	45	10	6	2	1	cytochrome-c oxidase activity	0
GO:0004175	0.0186	7	0	0	0	0	endopeptidase activity	0
GO:0004333	0.0868	10	2	2	1	1	fumarate hydratase activity	0
GO:0004371	0.1106	2	0	0	0	0	glycerone kinase activity	0
GO:0004375	0.1578	19	6	4	2	2	glycine dehydrogenase (decarboxylating) activity	0
GO:0004386	0.0801	92	16	1	0	0	helicase activity	0
GO:0004497	0.0095	9	3	2	1	1	monooxygenase activity	0
GO:0004518	0.0684	903	11	6	0	0	nuclease activity	0
GO:0004527	0.0451	79	0	0	0	0	exonuclease activity	0
GO:0004540	0.0598	44	11	8	5	3	ribonuclease activity	0
GO:0004553	0.1142	390	73	28	0	0	hydrolase activity, hydrolyzing O-glycosyl compounds	0
GO:0004672	0.0366	209	17	4	2	2	protein kinase activity	0
GO:0004673	0.0373	173	19	4	2	2	protein histidine kinase activity	0
GO:0004733	0.0129	9	2	1	0	0	pyridoxamine-phosphate oxidase activity	0
GO:0004774	0.164	17	6	4	2	2	succinate-CoA ligase activity	0
GO:0004775	0.164	17	6	4	2	2	succinate-CoA ligase (ADP-forming) activity	0
GO:0004803	0.0893	106	35	20	3	2	transposase activity	0
GO:0004854	0.0827	9	3	2	1	1	xanthine dehydrogenase activity	0
GO:0004871	0.0637	436	107	54	16	6	signal transducer activity	0
GO:0004872	0.0455	227	52	6	4	2	receptor activity	0
GO:0005198	0.2428	737	230	126	79	50	structural molecule activity	0
GO:0005215	0.1591	3529	609	201	43	16	transporter activity	0
GO:0005310	0.1227	9	0	0	0	0	dicarboxylic acid transmembrane transporter activity	0
GO:0005315	0.4547	27	10	6	1	1	inorganic phosphate transmembrane transporter activity	0
GO:0005342	0.0862	83	1	0	0	0	organic acid transmembrane transporter activity	0
GO:0005351	0.1732	136	27	16	1	1	sugar:hydrogen symporter activity	0
GO:0005381	0.1239	17	6	3	1	1	iron ion transmembrane transporter activity	0
GO:0005402	0.1732	136	27	16	1	1	cation:sugar symporter activity	0
GO:0005488	0.4812	4631	4631	2953	840	153	binding	0
GO:0005506	0.0599	241	9	0	0	0	iron ion binding	0
GO:0005507	0.062	31	2	0	0	0	copper ion binding	0
GO:0005515	0.0201	6	0	0	0	0	protein binding	0
GO:0005524	0.2163	4631	728	201	35	16	ATP binding	0
GO:0005525	0.0589	69	0	0	0	0	GTP binding	0
GO:0005618	0.0264	23	8	3	0	0	cell wall	0
GO:0005622	0.3095	4631	1495	550	229	85	intracellular	0
GO:0005623	0.3453	4631	3431	1060	303	116	cell	0
GO:0005694	0.122	227	0	0	0	0	chromosome	0
GO:0005737	0.3221	4631	1133	441	179	64	cytoplasm	0
GO:0005840	0.2314	757	225	114	74	51	ribosome	0
GO:0005886	0.1332	2919	411	97	5	0	plasma membrane	0
GO:0005975	0.168	1822	281	92	45	0	carbohydrate metabolic process	0
GO:0005976	0.0594	172	24	2	1	1	polysaccharide metabolic process	0
GO:0005977	0.1125	7	0	0	0	0	glycogen metabolic process	0
GO:0005978	0.3081	19	0	0	0	0	glycogen biosynthetic process	0
GO:0005984	0.155	17	6	4	1	1	disaccharide metabolic process	0
GO:0005991	0.1953	14	6	4	1	1	trehalose metabolic process	0
GO:0005992	0.0899	17	3	0	0	0	trehalose biosynthetic process	0
GO:0005996	0.0934	221	0	0	0	0	monosaccharide metabolic process	0
GO:0006004	0.303	3	0	0	0	0	fucose metabolic process	0
GO:0006006	0.0659	64	1	0	0	0	glucose metabolic process	0
GO:0006007	0.0613	42	2	1	0	0	glucose catabolic process	0
GO:0006022	0.1196	97	26	16	7	2	aminoglycan metabolic process	0
GO:0006023	0.4514	96	26	16	8	2	aminoglycan biosynthetic process	0
GO:0006024	0.4514	96	26	16	8	2	glycosaminoglycan biosynthetic process	0
GO:0006063	0.123	13	0	0	0	0	uronic acid metabolic process	0
GO:0006064	0.123	13	0	0	0	0	glucuronate catabolic process	0
GO:0006073	0.1184	11	0	0	0	0	cellular glucan metabolic process	0
GO:0006081	0.2736	60	16	10	5	4	cellular aldehyde metabolic process	0
GO:0006082	0.2903	3105	472	213	107	37	organic acid metabolic process	0
GO:0006084	0.1311	20	3	2	1	1	acetyl-CoA metabolic process	0
GO:0006090	0.4281	60	14	10	6	4	pyruvate metabolic process	0
GO:0006091	0.1191	402	39	15	2	0	generation of precursor metabolites and energy	0
GO:0006096	0.101	5	0	0	0	0	glycolysis	0
GO:0006098	0.0254	8	1	0	0	0	pentose-phosphate shunt	0
GO:0006099	0.0836	27	1	0	0	0	tricarboxylic acid cycle	0
GO:0006105	0.4524	32	2	1	0	0	succinate metabolic process	0
GO:0006112	0.1125	7	0	0	0	0	energy reserve metabolic process	0
GO:0006119	0.2317	60	8	1	0	0	oxidative phosphorylation	0
GO:0006139	0.2662	4631	2266	681	169	15	nucleobase-containing compound metabolic process	0
GO:0006144	0.0897	14	0	0	0	0	purine nucleobase metabolic process	0
GO:0006152	0.0823	399	6	4	2	2	purine nucleoside catabolic process	0
GO:0006163	0.127	1066	83	10	3	2	purine nucleotide metabolic process	0
GO:0006164	0.1854	409	57	28	11	6	purine nucleotide biosynthetic process	0
GO:0006184	0.0635	18	0	0	0	0	GTP catabolic process	0
GO:0006188	0.3469	85	16	8	3	2	IMP biosynthetic process	0
GO:0006189	0.3713	85	16	8	3	2	'de novo' IMP biosynthetic process	0
GO:0006195	0.0802	406	6	4	2	2	purine nucleotide catabolic process	0
GO:0006200	0.0699	265	6	4	2	2	ATP catabolic process	0
GO:0006206	0.0268	7	0	0	0	0	pyrimidine nucleobase metabolic process	0
GO:0006207	0.0468	9	2	0	0	0	'de novo' pyrimidine nucleobase biosynthetic process	0
GO:0006213	0.1012	38	4	0	0	0	pyrimidine nucleoside metabolic process	0
GO:0006220	0.1585	50	13	7	1	1	pyrimidine nucleotide metabolic process	0
GO:0006221	0.1437	48	11	5	0	0	pyrimidine nucleotide biosynthetic process	0
GO:0006222	0.1593	37	10	2	1	1	UMP biosynthetic process	0
GO:0006259	0.1347	1907	285	97	19	8	DNA metabolic process	0
GO:0006260	0.0853	304	20	2	0	0	DNA replication	0
GO:0006261	0.0397	37	0	0	0	0	DNA-dependent DNA replication	0
GO:0006265	0.1291	62	1	0	0	0	DNA topological change	0
GO:0006268	0.2951	36	0	0	0	0	DNA unwinding involved in DNA replication	0
GO:0006281	0.087	183	22	10	0	0	DNA repair	0
GO:0006289	0.1217	13	0	0	0	0	nucleotide-excision repair	0
GO:0006304	0.0792	89	21	6	4	3	DNA modification	0
GO:0006305	0.0925	44	0	0	0	0	DNA alkylation	0
GO:0006306	0.0925	44	0	0	0	0	DNA methylation	0
GO:0006310	0.0624	197	37	22	2	2	DNA recombination	0
GO:0006313	0.0936	137	38	21	2	2	transposition, DNA-mediated	0
GO:0006351	0.059	1237	145	25	6	1	transcription, DNA-templated	0
GO:0006354	0.0452	3	0	0	0	0	DNA-templated transcription, elongation	0
GO:0006355	0.0572	1163	152	24	6	1	regulation of transcription, DNA-templated	0
GO:0006364	0.1024	47	0	0	0	0	rRNA processing	0
GO:0006396	0.1612	544	55	4	0	0	RNA processing	0
GO:0006399	0.2785	640	93	43	21	6	tRNA metabolic process	0
GO:0006400	0.1025	159	2	1	0	0	tRNA modification	0
GO:0006401	0.0362	6	0	0	0	0	RNA catabolic process	0
GO:0006412	0.2891	1254	304	158	102	67	translation	0
GO:0006414	0.0922	28	9	5	1	0	translational elongation	0
GO:0006417	0.1022	39	9	5	1	0	regulation of translation	0
GO:0006418	0.5388	189	61	29	20	10	tRNA aminoacylation for protein translation	0
GO:0006448	0.1507	29	9	5	1	0	regulation of translational elongation	0
GO:0006450	0.1507	29	9	5	1	0	regulation of translational fidelity	0
GO:0006451	0.1156	19	4	3	0	0	translational readthrough	0
GO:0006457	0.0711	6	0	0	0	0	protein folding	0
GO:0006464	0.0263	4	0	0	0	0	cellular protein modification process	0
GO:0006468	0.0127	5	0	0	0	0	protein phosphorylation	0
GO:0006508	0.0525	168	0	0	0	0	proteolysis	0
GO:0006525	0.129	57	6	4	2	2	arginine metabolic process	0
GO:0006526	0.2125	50	6	4	2	2	arginine biosynthetic process	0
GO:0006527	0.231	27	1	1	0	0	arginine catabolic process	0
GO:0006536	0.1379	34	3	2	1	1	glutamate metabolic process	0
GO:0006537	0.2579	19	4	2	1	1	glutamate biosynthetic process	0
GO:0006541	0.0507	10	0	0	0	0	glutamine metabolic process	0
GO:0006544	0.0263	18	6	4	2	2	glycine metabolic process	0
GO:0006546	0.04	19	6	4	2	2	glycine catabolic process	0
GO:0006547	0.2085	70	16	9	4	3	histidine metabolic process	0
GO:0006548	0.3881	21	2	0	0	0	histidine catabolic process	0
GO:0006549	0.2269	13	0	0	0	0	isoleucine metabolic process	0
GO:0006551	0.1413	4	0	0	0	0	leucine metabolic process	0
GO:0006553	0.0601	6	0	0	0	0	lysine metabolic process	0
GO:0006560	0.4478	31	10	5	1	1	proline metabolic process	0
GO:0006561	0.548	30	10	5	1	1	proline biosynthetic process	0
GO:0006566	0.1379	13	0	0	0	0	threonine metabolic process	0
GO:0006568	0.1224	16	0	0	0	0	tryptophan metabolic process	0
GO:0006569	0.0293	3	0	0	0	0	tryptophan catabolic process	0
GO:0006576	0.0884	26	0	0	0	0	cellular biogenic amine metabolic process	0
GO:0006580	0.127	21	0	0	0	0	ethanolamine metabolic process	0
GO:0006586	0.1224	16	0	0	0	0	indolalkylamine metabolic process	0
GO:0006629	0.0787	331	49	24	1	0	lipid metabolic process	0
GO:0006631	0.0156	19	6	4	2	2	fatty acid metabolic process	0
GO:0006633	0.0172	19	5	3	2	2	fatty acid biosynthetic process	0
GO:0006637	0.1082	20	3	2	1	1	acyl-CoA metabolic process	0
GO:0006643	0.0747	40	3	0	0	0	membrane lipid metabolic process	0
GO:0006644	0.1271	129	20	10	2	1	phospholipid metabolic process	0
GO:0006664	0.0896	38	3	0	0	0	glycolipid metabolic process	0
GO:0006720	0.1623	86	15	10	5	4	isoprenoid metabolic process	0
GO:0006721	0.1885	68	15	10	5	4	terpenoid metabolic process	0
GO:0006725	0.3108	4631	2994	893	300	22	cellular aromatic compound metabolic process	0
GO:0006732	0.1202	621	38	7	0	0	coenzyme metabolic process	0
GO:0006733	0.0544	8	0	0	0	0	oxidoreduction coenzyme metabolic process	0
GO:0006739	0.0249	7	0	0	0	0	NADP metabolic process	0
GO:0006740	0.0242	8	1	0	0	0	NADPH regeneration	0
GO:0006753	0.1608	2089	224	43	23	10	nucleoside phosphate metabolic process	0
GO:0006754	0.2689	204	67	22	10	7	ATP biosynthetic process	0
GO:0006766	0.2691	422	88	45	28	21	vitamin metabolic process	0
GO:0006767	0.2691	422	88	45	28	21	water-soluble vitamin metabolic process	0
GO:0006771	0.2531	39	12	8	3	2	riboflavin metabolic process	0
GO:0006772	0.0605	22	1	0	0	0	thiamine metabolic process	0
GO:0006777	0.1271	45	13	6	4	3	Mo-molybdopterin cofactor biosynthetic process	0
GO:0006778	0.1162	62	19	6	4	3	porphyrin-containing compound metabolic process	0
GO:0006779	0.1189	59	17	6	4	3	porphyrin-containing compound biosynthetic process	0
GO:0006782	0.2195	18	2	1	0	0	protoporphyrinogen IX biosynthetic process	0
GO:0006783	0.2334	49	7	1	0	0	heme biosynthetic process	0
GO:0006793	0.2045	4631	722	138	41	13	phosphorus metabolic process	0
GO:0006796	0.1978	4631	668	133	39	13	phosphate-containing compound metabolic process	0
GO:0006807	0.3773	4631	4399	1450	520	72	nitrogen compound metabolic process	0
GO:0006810	0.1897	4631	996	318	131	34	transport	0
GO:0006811	0.1265	1102	178	51	2	0	ion transport	0
GO:0006812	0.1291	533	105	48	20	10	cation transport	0
GO:0006813	0.0688	35	5	4	2	2	potassium ion transport	0
GO:0006814	0.1729	96	25	11	7	5	sodium ion transport	0
GO:0006817	0.4088	35	12	8	3	1	phosphate ion transport	0
GO:0006818	0.1383	220	66	23	11	8	hydrogen transport	0
GO:0006820	0.0694	213	14	3	1	1	anion transport	0
GO:0006835	0.1227	9	0	0	0	0	dicarboxylic acid transport	0
GO:0006865	0.0428	63	3	0	0	0	amino acid transport	0
GO:0006873	0.0277	19	6	4	2	2	cellular ion homeostasis	0
GO:0006875	0.0303	21	6	4	2	2	cellular metal ion homeostasis	0
GO:0006879	0.0323	20	4	4	2	2	cellular iron ion homeostasis	0
GO:0006928	0.3839	223	66	37	15	0	cellular component movement	0
GO:0006935	0.0533	96	0	0	0	0	chemotaxis	0
GO:0006950	0.0874	782	77	40	9	0	response to stress	0
GO:0006952	0.1417	218	79	49	24	5	defense response	0
GO:0006974	0.0834	183	22	10	0	0	cellular response to DNA damage stimulus	0
GO:0006979	0.0907	20	4	2	1	1	response to oxidative stress	0
GO:0006996	0.0352	24	0	0	0	0	organelle organization	0
GO:0007049	0.1027	153	33	18	8	4	cell cycle	0
GO:0007154	0.072	533	132	65	30	7	cell communication	0
GO:0007165	0.0718	522	138	69	30	8	signal transduction	0
GO:0008026	0.1643	53	0	0	0	0	ATP-dependent helicase activity	0
GO:0008033	0.1341	305	6	0	0	0	tRNA processing	0
GO:0008094	0.1225	51	2	1	0	0	DNA-dependent ATPase activity	0
GO:0008104	0.0565	267	30	8	2	2	protein localization	0
GO:0008115	0.1629	25	9	5	2	2	sarcosine oxidase activity	0
GO:0008137	0.2985	84	24	13	2	0	NADH dehydrogenase (ubiquinone) activity	0
GO:0008152	0.6668	4631	4631	4631	2969	601	metabolic process	0
GO:0008168	0.0453	104	0	0	0	0	methyltransferase activity	0
GO:0008233	0.0459	120	0	0	0	0	peptidase activity	0
GO:0008238	0.0369	54	0	0	0	0	exopeptidase activity	0
GO:0008270	0.0313	10	1	0	0	0	zinc ion binding	0
GO:0008272	0.119	30	3	2	1	1	sulfate transport	0
GO:0008299	0.1623	86	15	10	5	4	isoprenoid biosynthetic process	0
GO:0008324	0.1317	651	123	53	1	1	cation transmembrane transporter activity	0
GO:0008360	0.2391	110	26	16	10	3	regulation of cell shape	0
GO:0008410	0.0946	16	6	3	2	2	CoA-transferase activity	0
GO:0008483	0.081	38	8	1	1	1	transaminase activity	0
GO:0008509	0.0597	141	6	0	0	0	anion transmembrane transporter activity	0
GO:0008514	0.0645	52	2	1	0	0	organic anion transmembrane transporter activity	0
GO:0008556	0.4971	27	6	4	2	2	potassium-transporting ATPase activity	0
GO:0008565	0.0288	30	5	3	0	0	protein transporter activity	0
GO:0008610	0.0961	334	49	22	0	0	lipid biosynthetic process	0
GO:0008616	0.117	19	0	0	0	0	queuosine biosynthetic process	0
GO:0008643	0.1449	319	63	28	16	0	carbohydrate transport	0
GO:0008652	0.3032	745	200	80	50	17	cellular amino acid biosynthetic process	0
GO:0008653	0.0729	52	4	0	0	0	lipopolysaccharide metabolic process	0
GO:0008654	0.1354	131	19	10	3	1	phospholipid biosynthetic process	0
GO:0008655	0.1197	2	0	0	0	0	pyrimidine-containing compound salvage	0
GO:0008746	0.3392	18	5	2	1	1	NAD(P)+ transhydrogenase activity	0
GO:0008750	0.3392	18	5	2	1	1	NAD(P)+ transhydrogenase (AB-specific) activity	0
GO:0008757	0.029	15	0	0	0	0	S-adenosylmethionine-dependent methyltransferase activity	0
GO:0008851	0.2608	2	0	0	0	0	ethanolamine ammonia-lyase activity	0
GO:0008901	0.357	29	6	4	2	2	ferredoxin hydrogenase activity	0
GO:0008940	0.0821	10	3	2	1	1	nitrate reductase activity	0
GO:0008982	0.1862	131	30	13	0	0	protein-N(PI)-phosphohistidine-sugar phosphotransferase activity	0
GO:0009008	0.1067	14	0	0	0	0	DNA-methyltransferase activity	0
GO:0009039	0.5394	15	4	1	0	0	urease activity	0
GO:0009055	0.069	347	16	0	0	0	electron carrier activity	0
GO:0009056	0.1301	2610	37	5	2	2	catabolic process	0
GO:0009057	0.0321	37	0	0	0	0	macromolecule catabolic process	0
GO:0009058	0.3194	4631	2765	1001	421	133	biosynthetic process	0
GO:0009059	0.1652	4631	823	265	142	64	macromolecule biosynthetic process	0
GO:0009060	0.1117	66	0	0	0	0	aerobic respiration	0
GO:0009063	0.1383	112	18	8	1	1	cellular amino acid catabolic process	0
GO:0009064	0.1785	189	28	10	0	0	glutamine family amino acid metabolic process	0
GO:0009065	0.0869	27	3	2	1	1	glutamine family amino acid catabolic process	0
GO:0009066	0.057	24	0	0	0	0	aspartate family amino acid metabolic process	0
GO:0009067	0.0645	25	0	0	0	0	aspartate family amino acid biosynthetic process	0
GO:0009069	0.0176	20	6	4	2	2	serine family amino acid metabolic process	0
GO:0009071	0.04	19	6	4	2	2	serine family amino acid catabolic process	0
GO:0009072	0.1783	155	15	5	1	1	aromatic amino acid family metabolic process	0
GO:0009073	0.2591	131	18	5	1	1	aromatic amino acid family biosynthetic process	0
GO:0009074	0.274	30	6	3	1	1	aromatic amino acid family catabolic process	0
GO:0009081	0.1799	66	2	0	0	0	branched-chain amino acid metabolic process	0
GO:0009082	0.235	64	0	0	0	0	branched-chain amino acid biosynthetic process	0
GO:0009084	0.3467	121	30	13	1	1	glutamine family amino acid biosynthetic process	0
GO:0009085	0.0676	6	0	0	0	0	lysine biosynthetic process	0
GO:0009088	0.1653	13	0	0	0	0	threonine biosynthetic process	0
GO:0009089	0.0718	6	0	0	0	0	lysine biosynthetic process via diaminopimelate	0
GO:0009095	0.1595	13	1	0	0	0	aromatic amino acid family biosynthetic process, prephenate pathway	0
GO:0009097	0.2269	13	0	0	0	0	isoleucine biosynthetic process	0
GO:0009098	0.1413	4	0	0	0	0	leucine biosynthetic process	0
GO:0009103	0.0741	52	4	0	0	0	lipopolysaccharide biosynthetic process	0
GO:0009108	0.1303	478	52	13	3	1	coenzyme biosynthetic process	0
GO:0009110	0.2773	418	88	45	30	21	vitamin biosynthetic process	0
GO:0009112	0.1384	36	1	0	0	0	nucleobase metabolic process	0
GO:0009113	0.0796	10	0	0	0	0	purine nucleobase biosynthetic process	0
GO:0009116	0.1307	1390	94	16	8	5	nucleoside metabolic process	0
GO:0009117	0.1623	2066	224	43	23	10	nucleotide metabolic process	0
GO:0009119	0.1341	1310	93	15	8	4	ribonucleoside metabolic process	0
GO:0009123	0.1193	834	81	8	4	2	nucleoside monophosphate metabolic process	0
GO:0009124	0.2116	419	71	30	15	4	nucleoside monophosphate biosynthetic process	0
GO:0009125	0.0685	268	6	4	2	2	nucleoside monophosphate catabolic process	0
GO:0009126	0.1053	679	81	5	2	2	purine nucleoside monophosphate metabolic process	0
GO:0009127	0.219	328	63	24	14	4	purine nucleoside monophosphate biosynthetic process	0
GO:0009128	0.0699	265	6	4	2	2	purine nucleoside monophosphate catabolic process	0
GO:0009129	0.1708	48	6	4	1	1	pyrimidine nucleoside monophosphate metabolic process	0
GO:0009130	0.1708	48	6	4	1	1	pyrimidine nucleoside monophosphate biosynthetic process	0
GO:0009141	0.1069	828	36	9	2	2	nucleoside triphosphate metabolic process	0
GO:0009142	0.1745	190	51	20	10	7	nucleoside triphosphate biosynthetic process	0
GO:0009143	0.0839	411	6	4	2	2	nucleoside triphosphate catabolic process	0
GO:0009144	0.0986	749	42	7	2	2	purine nucleoside triphosphate metabolic process	0
GO:0009145	0.1891	206	65	23	10	7	purine nucleoside triphosphate biosynthetic process	0
GO:0009146	0.0823	399	6	4	2	2	purine nucleoside triphosphate catabolic process	0
GO:0009147	0.1049	15	2	2	1	1	pyrimidine nucleoside triphosphate metabolic process	0
GO:0009150	0.123	1037	75	10	4	2	purine ribonucleotide metabolic process	0
GO:0009152	0.1879	390	57	28	13	5	purine ribonucleotide biosynthetic process	0
GO:0009154	0.0817	404	6	4	2	2	purine ribonucleotide catabolic process	0
GO:0009156	0.2182	390	70	28	13	5	ribonucleoside monophosphate biosynthetic process	0
GO:0009157	0.2784	22	3	2	1	1	deoxyribonucleoside monophosphate biosynthetic process	0
GO:0009158	0.0699	265	6	4	2	2	ribonucleoside monophosphate catabolic process	0
GO:0009161	0.1151	834	86	8	4	3	ribonucleoside monophosphate metabolic process	0
GO:0009162	0.1283	19	3	2	1	1	deoxyribonucleoside monophosphate metabolic process	0
GO:0009163	0.1629	426	50	19	5	1	nucleoside biosynthetic process	0
GO:0009164	0.0777	401	6	4	2	2	nucleoside catabolic process	0
GO:0009165	0.1365	776	101	24	8	5	nucleotide biosynthetic process	0
GO:0009166	0.074	394	6	4	2	2	nucleotide catabolic process	0
GO:0009167	0.1053	679	81	5	2	2	purine ribonucleoside monophosphate metabolic process	0
GO:0009168	0.219	328	63	24	14	4	purine ribonucleoside monophosphate biosynthetic process	0
GO:0009169	0.0699	265	6	4	2	2	purine ribonucleoside monophosphate catabolic process	0
GO:0009173	0.1593	37	10	2	1	1	pyrimidine ribonucleoside monophosphate metabolic process	0
GO:0009174	0.1593	37	10	2	1	1	pyrimidine ribonucleoside monophosphate biosynthetic process	0
GO:0009176	0.2784	22	3	2	1	1	pyrimidine deoxyribonucleoside monophosphate metabolic process	0
GO:0009177	0.2784	22	3	2	1	1	pyrimidine deoxyribonucleoside monophosphate biosynthetic process	0
GO:0009187	0.0205	28	6	0	0	0	cyclic nucleotide metabolic process	0
GO:0009190	0.0205	28	6	0	0	0	cyclic nucleotide biosynthetic process	0
GO:0009199	0.1029	730	38	9	2	2	ribonucleoside triphosphate metabolic process	0
GO:0009200	0.3371	20	5	2	1	1	deoxyribonucleoside triphosphate metabolic process	0
GO:0009201	0.1698	192	56	21	10	7	ribonucleoside triphosphate biosynthetic process	0
GO:0009203	0.0823	399	6	4	2	2	ribonucleoside triphosphate catabolic process	0
GO:0009205	0.0986	749	42	7	2	2	purine ribonucleoside triphosphate metabolic process	0
GO:0009206	0.1891	206	65	23	10	7	purine ribonucleoside triphosphate biosynthetic process	0
GO:0009207	0.0823	399	6	4	2	2	purine ribonucleoside triphosphate catabolic process	0
GO:0009211	0.3371	20	5	2	1	1	pyrimidine deoxyribonucleoside triphosphate metabolic process	0
GO:0009218	0.1113	36	6	0	0	0	pyrimidine ribonucleotide metabolic process	0
GO:0009219	0.2808	23	3	1	1	1	pyrimidine deoxyribonucleotide metabolic process	0
GO:0009220	0.1113	36	6	0	0	0	pyrimidine ribonucleotide biosynthetic process	0
GO:0009221	0.2808	23	3	1	1	1	pyrimidine deoxyribonucleotide biosynthetic process	0
GO:0009228	0.0969	35	2	1	0	0	thiamine biosynthetic process	0
GO:0009229	0.0396	9	2	1	0	0	thiamine diphosphate biosynthetic process	0
GO:0009231	0.2531	39	12	8	3	2	riboflavin biosynthetic process	0
GO:0009233	0.2925	23	1	0	0	0	menaquinone metabolic process	0
GO:0009234	0.2925	23	1	0	0	0	menaquinone biosynthetic process	0
GO:0009235	0.4273	210	59	29	20	14	cobalamin metabolic process	0
GO:0009236	0.4273	210	59	29	20	14	cobalamin biosynthetic process	0
GO:0009240	0.5428	59	14	10	6	4	isopentenyl diphosphate biosynthetic process	0
GO:0009245	0.1504	44	3	0	0	0	lipid A biosynthetic process	0
GO:0009247	0.1116	45	3	0	0	0	glycolipid biosynthetic process	0
GO:0009250	0.1021	18	0	0	0	0	glucan biosynthetic process	0
GO:0009252	0.4514	96	26	16	8	2	peptidoglycan biosynthetic process	0
GO:0009259	0.1392	1281	104	14	9	4	ribonucleotide metabolic process	0
GO:0009260	0.2156	478	69	31	20	2	ribonucleotide biosynthetic process	0
GO:0009261	0.0817	404	6	4	2	2	ribonucleotide catabolic process	0
GO:0009262	0.1514	29	5	2	0	0	deoxyribonucleotide metabolic process	0
GO:0009263	0.2211	39	5	2	0	0	deoxyribonucleotide biosynthetic process	0
GO:0009265	0.2808	23	3	1	1	1	2'-deoxyribonucleotide biosynthetic process	0
GO:0009273	0.3738	96	26	16	8	2	peptidoglycan-based cell wall biogenesis	0
GO:0009274	0.124	32	11	3	0	0	peptidoglycan-based cell wall	0
GO:0009276	0.1316	33	10	3	0	0	Gram-negative-bacterium-type cell wall	0
GO:0009279	0.0303	101	13	7	5	4	cell outer membrane	0
GO:0009288	0.4825	263	87	49	28	15	bacterial-type flagellum	0
GO:0009306	0.0397	52	9	1	0	0	protein secretion	0
GO:0009308	0.0496	26	1	0	0	0	amine metabolic process	0
GO:0009309	0.0898	14	0	0	0	0	amine biosynthetic process	0
GO:0009310	0.0205	2	0	0	0	0	amine catabolic process	0
GO:0009311	0.0667	42	5	0	0	0	oligosaccharide metabolic process	0
GO:0009312	0.0744	42	5	0	0	0	oligosaccharide biosynthetic process	0
GO:0009317	0.0555	20	5	4	2	2	acetyl-CoA carboxylase complex	0
GO:0009325	0.1025	10	3	2	1	1	nitrate reductase complex	0
GO:0009394	0.2808	23	3	1	1	1	2'-deoxyribonucleotide metabolic process	0
GO:0009399	0.1451	124	29	17	6	3	nitrogen fixation	0
GO:0009401	0.2367	286	61	28	15	0	phosphoenolpyruvate-dependent sugar phosphotransferase system	0
GO:0009423	0.2698	35	0	0	0	0	chorismate biosynthetic process	0
GO:0009425	0.4388	104	36	21	0	0	bacterial-type flagellum basal body	0
GO:0009426	0.2961	18	0	0	0	0	bacterial-type flagellum basal body, distal rod	0
GO:0009432	0.0618	2	0	0	0	0	SOS response	0
GO:0009451	0.1469	314	14	2	1	1	RNA modification	0
GO:0009605	0.0554	105	0	0	0	0	response to external stimulus	0
GO:0009607	0.1809	230	84	48	24	5	response to biotic stimulus	0
GO:0009615	0.3164	252	89	57	24	7	response to virus	0
GO:0009653	0.1313	120	23	16	10	3	anatomical structure morphogenesis	0
GO:0009889	0.0622	1290	152	28	6	1	regulation of biosynthetic process	0
GO:0009987	0.5507	4631	4631	4196	1437	493	cellular process	0
GO:0009991	0.0434	2	0	0	0	0	response to extracellular stimulus	0
GO:0010138	0.1197	2	0	0	0	0	pyrimidine ribonucleotide salvage	0
GO:0010181	0.0151	7	0	0	0	0	FMN binding	0
GO:0010467	0.1582	4490	828	263	146	63	gene expression	0
GO:0010468	0.0642	1326	160	29	5	1	regulation of gene expression	0
GO:0010498	0.272	25	1	0	0	0	proteasomal protein catabolic process	0
GO:0010556	0.0622	1290	152	28	6	1	regulation of macromolecule biosynthetic process	0
GO:0010608	0.0963	39	9	5	1	0	posttranscriptional regulation of gene expression	0
GO:0015002	0.1367	47	10	6	2	1	heme-copper terminal oxidase activity	0
GO:0015031	0.0528	237	30	9	2	2	protein transport	0
GO:0015074	0.0062	3	0	0	0	0	DNA integration	0
GO:0015075	0.1392	928	205	74	4	1	ion transmembrane transporter activity	0
GO:0015077	0.1434	368	77	28	14	3	monovalent inorganic cation transmembrane transporter activity	0
GO:0015078	0.1409	285	69	29	12	3	hydrogen ion transmembrane transporter activity	0
GO:0015079	0.1979	56	6	4	2	2	potassium ion transmembrane transporter activity	0
GO:0015081	0.0493	22	0	0	0	0	sodium ion transmembrane transporter activity	0
GO:0015098	0.0778	9	3	2	1	1	molybdate ion transmembrane transporter activity	0
GO:0015103	0.0264	13	3	2	1	1	inorganic anion transmembrane transporter activity	0
GO:0015116	0.1356	26	3	2	1	1	sulfate transmembrane transporter activity	0
GO:0015144	0.1455	208	38	21	9	2	carbohydrate transmembrane transporter activity	0
GO:0015171	0.0459	16	0	0	0	0	amino acid transmembrane transporter activity	0
GO:0015235	0.4744	41	13	9	1	0	cobalamin transporter activity	0
GO:0015291	0.1208	269	46	13	0	0	secondary active transmembrane transporter activity	0
GO:0015293	0.1423	224	36	13	0	0	symporter activity	0
GO:0015294	0.1379	207	26	13	0	0	solute:cation symporter activity	0
GO:0015295	0.1732	136	27	16	1	1	solute:hydrogen symporter activity	0
GO:0015343	0.1283	19	6	3	1	1	siderophore transmembrane transporter activity	0
GO:0015370	0.109	13	0	0	0	0	solute:sodium symporter activity	0
GO:0015399	0.1022	333	64	30	13	7	primary active transmembrane transporter activity	0
GO:0015405	0.1022	333	64	30	13	7	P-P-bond-hydrolysis-driven transmembrane transporter activity	0
GO:0015419	0.1736	25	3	2	1	1	sulfate transmembrane-transporting ATPase activity	0
GO:0015420	0.5322	46	15	9	1	0	cobalamin-transporting ATPase activity	0
GO:0015603	0.1283	19	6	3	1	1	iron chelate transmembrane transporter activity	0
GO:0015627	0.0154	22	5	4	2	2	type II protein secretion system complex	0
GO:0015628	0.0154	22	5	4	2	2	protein secretion by the type II secretion system	0
GO:0015662	0.331	27	6	4	2	2	ATPase activity, coupled to transmembrane movement of ions, phosphorylative mechanism	0
GO:0015672	0.1677	364	99	39	20	14	monovalent inorganic cation transport	0
GO:0015688	0.1189	19	6	3	1	1	iron chelate transport	0
GO:0015689	0.0778	9	3	2	1	1	molybdate ion transport	0
GO:0015698	0.1157	92	15	10	5	1	inorganic anion transport	0
GO:0015711	0.0428	122	4	2	1	1	organic anion transport	0
GO:0015716	0.2123	7	0	0	0	0	organic phosphonate transport	0
GO:0015774	0.0589	10	3	2	1	1	polysaccharide transport	0
GO:0015849	0.0502	130	3	1	0	0	organic acid transport	0
GO:0015891	0.1189	19	6	3	1	1	siderophore transport	0
GO:0015925	0.1399	15	2	1	0	0	galactosidase activity	0
GO:0015930	0.234	13	3	2	1	1	glutamate synthase activity	0
GO:0015934	0.0734	31	0	0	0	0	large ribosomal subunit	0
GO:0015935	0.3782	66	1	0	0	0	small ribosomal subunit	0
GO:0015936	0.1413	16	0	0	0	0	coenzyme A metabolic process	0
GO:0015937	0.1055	18	0	0	0	0	coenzyme A biosynthetic process	0
GO:0015942	0.2331	20	0	0	0	0	formate metabolic process	0
GO:0015980	0.1009	194	21	3	0	0	energy derivation by oxidation of organic compounds	0
GO:0015985	0.2689	204	67	22	10	7	energy coupled proton transport, down electrochemical gradient	0
GO:0015986	0.2689	204	67	22	10	7	ATP synthesis coupled proton transport	0
GO:0015988	0.1405	68	18	8	3	2	energy coupled proton transmembrane transport, against electrochemical gradient	0
GO:0015991	0.1531	67	18	8	3	2	ATP hydrolysis coupled proton transport	0
GO:0015992	0.1383	220	66	23	11	8	proton transport	0
GO:0016020	0.2735	4631	2836	985	169	5	membrane	0
GO:0016021	0.1941	4631	1370	291	21	1	integral component of membrane	0
GO:0016043	0.0938	694	56	22	8	3	cellular component organization	0
GO:0016051	0.1009	229	59	22	0	0	carbohydrate biosynthetic process	0
GO:0016052	0.0782	169	0	0	0	0	carbohydrate catabolic process	0
GO:0016053	0.2399	1021	233	98	56	17	organic acid biosynthetic process	0
GO:0016054	0.083	134	13	3	1	1	organic acid catabolic process	0
GO:0016070	0.108	3312	368	73	27	11	RNA metabolic process	0
GO:0016072	0.1024	47	0	0	0	0	rRNA metabolic process	0
GO:0016114	0.1885	68	15	10	5	4	terpenoid biosynthetic process	0
GO:0016151	0.2168	59	12	2	0	0	nickel cation binding	0
GO:0016163	0.1332	10	3	1	1	1	nitrogenase activity	0
GO:0016301	0.0635	565	8	4	2	2	kinase activity	0
GO:0016310	0.0631	614	9	4	2	2	phosphorylation	0
GO:0016405	0.164	17	6	4	2	2	CoA-ligase activity	0
GO:0016421	0.0555	20	5	4	2	2	CoA carboxylase activity	0
GO:0016462	0.1692	2768	293	45	1	0	pyrophosphatase activity	0
GO:0016469	0.1791	179	55	15	8	6	proton-transporting two-sector ATPase complex	0
GO:0016491	0.1784	4631	677	203	22	12	oxidoreductase activity	0
GO:0016624	0.151	8	2	0	0	0	oxidoreductase activity, acting on the aldehyde or oxo group of donors, disulfide as acceptor	0
GO:0016627	0.0199	5	0	0	0	0	oxidoreductase activity, acting on the CH-CH group of donors	0
GO:0016638	0.0473	47	10	6	3	3	oxidoreductase activity, acting on the CH-NH2 group of donors	0
GO:0016641	0.0117	8	1	1	0	0	oxidoreductase activity, acting on the CH-NH2 group of donors, oxygen as acceptor	0
GO:0016642	0.1578	19	6	4	2	2	oxidoreductase activity, acting on the CH-NH2 group of donors, disulfide as acceptor	0
GO:0016645	0.0685	20	5	1	0	0	oxidoreductase activity, acting on the CH-NH group of donors	0
GO:0016647	0.1629	25	9	5	2	2	oxidoreductase activity, acting on the CH-NH group of donors, oxygen as acceptor	0
GO:0016651	0.2989	238	74	43	22	14	oxidoreductase activity, acting on NAD(P)H	0
GO:0016652	0.2436	20	5	2	1	1	oxidoreductase activity, acting on NAD(P)H, NAD(P) as acceptor	0
GO:0016655	0.4195	196	63	36	23	15	oxidoreductase activity, acting on NAD(P)H, quinone or similar compound as acceptor	0
GO:0016661	0.1705	45	7	4	1	1	oxidoreductase activity, acting on other nitrogenous compounds as donors	0
GO:0016667	0.0185	11	0	0	0	0	oxidoreductase activity, acting on a sulfur group of donors	0
GO:0016671	0.0759	20	4	4	2	2	oxidoreductase activity, acting on a sulfur group of donors, disulfide as acceptor	0
GO:0016675	0.1503	45	10	6	2	1	oxidoreductase activity, acting on a heme group of donors	0
GO:0016676	0.1503	45	10	6	2	1	oxidoreductase activity, acting on a heme group of donors, oxygen as acceptor	0
GO:0016695	0.357	29	6	4	2	2	oxidoreductase activity, acting on hydrogen as donor	0
GO:0016699	0.357	29	6	4	2	2	oxidoreductase activity, acting on hydrogen as donor, iron-sulfur protein as acceptor	0
GO:0016701	0.0227	12	0	0	0	0	oxidoreductase activity, acting on single donors with incorporation of molecular oxygen	0
GO:0016702	0.0599	14	0	0	0	0	oxidoreductase activity, acting on single donors with incorporation of molecular oxygen, incorporation of two atoms of oxygen	0
GO:0016705	0.0232	44	0	0	0	0	oxidoreductase activity, acting on paired donors, with incorporation or reduction of molecular oxygen	0
GO:0016706	0.0585	14	0	0	0	0	oxidoreductase activity, acting on paired donors, with incorporation or reduction of molecular oxygen, 2-oxoglutarate as one donor, and incorporation of one atom each of oxygen into both donors	0
GO:0016725	0.1773	28	7	1	0	0	oxidoreductase activity, acting on CH or CH2 groups	0
GO:0016726	0.0529	6	0	0	0	0	oxidoreductase activity, acting on CH or CH2 groups, NAD or NADP as acceptor	0
GO:0016730	0.3101	40	13	7	2	2	oxidoreductase activity, acting on iron-sulfur proteins as donors	0
GO:0016732	0.1332	10	3	1	1	1	oxidoreductase activity, acting on iron-sulfur proteins as donors, dinitrogen as acceptor	0
GO:0016740	0.2302	4631	1289	4	1	1	transferase activity	0
GO:0016741	0.0469	165	0	0	0	0	transferase activity, transferring one-carbon groups	0
GO:0016746	0.0305	1	0	0	0	0	transferase activity, transferring acyl groups	0
GO:0016757	0.0338	35	0	0	0	0	transferase activity, transferring glycosyl groups	0
GO:0016758	0.0231	4	0	0	0	0	transferase activity, transferring hexosyl groups	0
GO:0016763	0.1009	93	1	0	0	0	transferase activity, transferring pentosyl groups	0
GO:0016769	0.0789	38	8	1	1	1	transferase activity, transferring nitrogenous groups	0
GO:0016772	0.1013	2352	74	13	0	0	transferase activity, transferring phosphorus-containing groups	0
GO:0016773	0.0727	478	62	15	0	0	phosphotransferase activity, alcohol group as acceptor	0
GO:0016775	0.0372	167	18	4	2	2	phosphotransferase activity, nitrogenous group as acceptor	0
GO:0016779	0.0352	13	2	1	0	0	nucleotidyltransferase activity	0
GO:0016782	0.0248	19	3	2	0	0	transferase activity, transferring sulfur-containing groups	0
GO:0016787	0.2923	4629	3075	275	0	0	hydrolase activity	0
GO:0016788	0.0936	1732	28	17	8	0	hydrolase activity, acting on ester bonds	0
GO:0016791	0.0257	1	0	0	0	0	phosphatase activity	0
GO:0016798	0.0972	376	82	14	0	0	hydrolase activity, acting on glycosyl bonds	0
GO:0016810	0.0383	6	0	0	0	0	hydrolase activity, acting on carbon-nitrogen (but not peptide) bonds	0
GO:0016811	0.0272	18	2	2	1	1	hydrolase activity, acting on carbon-nitrogen (but not peptide) bonds, in linear amides	0
GO:0016813	0.026	7	0	0	0	0	hydrolase activity, acting on carbon-nitrogen (but not peptide) bonds, in linear amidines	0
GO:0016817	0.1675	2796	290	45	1	0	hydrolase activity, acting on acid anhydrides	0
GO:0016818	0.1676	2752	289	45	1	0	hydrolase activity, acting on acid anhydrides, in phosphorus-containing anhydrides	0
GO:0016820	0.1235	352	66	32	14	6	hydrolase activity, acting on acid anhydrides, catalyzing transmembrane movement of substances	0
GO:0016829	0.0938	1219	5	0	0	0	lyase activity	0
GO:0016832	0.0191	3	0	0	0	0	aldehyde-lyase activity	0
GO:0016835	0.0601	162	2	1	0	0	carbon-oxygen lyase activity	0
GO:0016836	0.0715	75	0	0	0	0	hydro-lyase activity	0
GO:0016841	0.043	8	2	0	0	0	ammonia-lyase activity	0
GO:0016849	0.0199	28	6	0	0	0	phosphorus-oxygen lyase activity	0
GO:0016853	0.056	294	0	0	0	0	isomerase activity	0
GO:0016859	0.0318	11	2	1	0	0	cis-trans isomerase activity	0
GO:0016860	0.0601	28	2	1	0	0	intramolecular oxidoreductase activity	0
GO:0016861	0.0908	23	0	0	0	0	intramolecular oxidoreductase activity, interconverting aldoses and ketoses	0
GO:0016874	0.1548	683	119	46	20	6	ligase activity	0
GO:0016875	0.2583	192	61	29	20	10	ligase activity, forming carbon-oxygen bonds	0
GO:0016876	0.2583	192	61	29	20	10	ligase activity, forming aminoacyl-tRNA and related compounds	0
GO:0016877	0.0639	19	6	4	2	2	ligase activity, forming carbon-sulfur bonds	0
GO:0016878	0.0639	19	6	4	2	2	acid-thiol ligase activity	0
GO:0016879	0.1067	157	26	12	4	3	ligase activity, forming carbon-nitrogen bonds	0
GO:0016881	0.0989	48	13	6	4	3	acid-amino acid ligase activity	0
GO:0016885	0.0475	20	5	4	2	2	ligase activity, forming carbon-carbon bonds	0
GO:0016887	0.1215	1261	114	7	2	2	ATPase activity	0
GO:0016903	0.0656	27	0	0	0	0	oxidoreductase activity, acting on the aldehyde or oxo group of donors	0
GO:0016998	0.0186	22	0	0	0	0	cell wall macromolecule catabolic process	0
GO:0017076	0.2419	4631	942	259	87	22	purine nucleotide binding	0
GO:0017111	0.1675	2583	291	46	1	0	nucleoside-triphosphatase activity	0
GO:0018065	0.0916	1	0	0	0	0	protein-cofactor linkage	0
GO:0018106	0.0614	9	0	0	0	0	peptidyl-histidine phosphorylation	0
GO:0018130	0.1601	4628	763	234	86	0	heterocycle biosynthetic process	0
GO:0018193	0.0259	14	1	0	0	0	peptidyl-amino acid modification	0
GO:0018202	0.0614	9	0	0	0	0	peptidyl-histidine modification	0
GO:0018208	0.033	11	2	1	0	0	peptidyl-proline modification	0
GO:0018492	0.3233	17	3	2	1	1	carbon-monoxide dehydrogenase (acceptor) activity	0
GO:0019001	0.0477	69	0	0	0	0	guanyl nucleotide binding	0
GO:0019012	0.0613	128	3	0	0	0	virion	0
GO:0019015	0.1772	127	2	0	0	0	viral genome	0
GO:0019038	0.1772	127	2	0	0	0	provirus	0
GO:0019219	0.0582	1178	152	24	6	1	regulation of nucleobase-containing compound metabolic process	0
GO:0019222	0.0685	1477	156	29	3	1	regulation of metabolic process	0
GO:0019288	0.5428	59	14	10	6	4	isopentenyl diphosphate biosynthetic process, methylerythritol 4-phosphate pathway	0
GO:0019294	0.1281	14	0	0	0	0	keto-3-deoxy-D-manno-octulosonic acid biosynthetic process	0
GO:0019295	0.4256	17	2	1	0	0	coenzyme M biosynthetic process	0
GO:0019296	0.4256	17	2	1	0	0	coenzyme M metabolic process	0
GO:0019318	0.0714	63	1	0	0	0	hexose metabolic process	0
GO:0019320	0.0593	42	2	1	0	0	hexose catabolic process	0
GO:0019321	0.0755	22	0	0	0	0	pentose metabolic process	0
GO:0019362	0.0515	9	0	0	0	0	pyridine nucleotide metabolic process	0
GO:0019438	0.1526	4631	694	210	54	1	aromatic compound biosynthetic process	0
GO:0019439	0.0816	645	9	4	2	2	aromatic compound catabolic process	0
GO:0019464	0.166	20	6	4	2	2	glycine decarboxylation via glycine cleavage system	0
GO:0019509	0.0896	13	3	2	1	1	L-methionine salvage from methylthioadenosine	0
GO:0019538	0.2035	3650	491	208	109	65	protein metabolic process	0
GO:0019545	0.4524	32	2	1	0	0	arginine catabolic process to succinate	0
GO:0019556	0.3881	21	2	0	0	0	histidine catabolic process to glutamate and formamide	0
GO:0019557	0.3881	21	2	0	0	0	histidine catabolic process to glutamate and formate	0
GO:0019566	0.0571	7	0	0	0	0	arabinose metabolic process	0
GO:0019585	0.123	13	0	0	0	0	glucuronate metabolic process	0
GO:0019627	0.4485	28	10	6	4	2	urea metabolic process	0
GO:0019634	0.7296	57	17	9	2	0	organic phosphonate metabolic process	0
GO:0019637	0.1979	3608	457	104	36	11	organophosphate metabolic process	0
GO:0019682	0.5428	59	14	10	6	4	glyceraldehyde-3-phosphate metabolic process	0
GO:0019692	0.2305	25	3	1	1	1	deoxyribose phosphate metabolic process	0
GO:0019693	0.1453	1362	138	17	10	3	ribose phosphate metabolic process	0
GO:0019700	0.0812	3	0	0	0	0	organic phosphonate catabolic process	0
GO:0019720	0.1271	45	13	6	4	3	Mo-molybdopterin cofactor metabolic process	0
GO:0019725	0.0253	20	4	2	1	1	cellular homeostasis	0
GO:0019752	0.2912	3009	465	204	101	38	carboxylic acid metabolic process	0
GO:0019829	0.2719	209	73	26	10	6	cation-transporting ATPase activity	0
GO:0019843	0.3905	413	125	70	42	8	rRNA binding	0
GO:0019856	0.0288	6	2	0	0	0	pyrimidine nucleobase biosynthetic process	0
GO:0019867	0.0398	306	12	8	5	4	outer membrane	0
GO:0020037	0.0672	209	19	0	0	0	heme binding	0
GO:0022402	0.0187	9	2	1	0	0	cell cycle process	0
GO:0022411	0.0598	9	0	0	0	0	cellular component disassembly	0
GO:0022603	0.2269	110	26	16	10	3	regulation of anatomical structure morphogenesis	0
GO:0022604	0.2391	110	26	16	10	3	regulation of cell morphogenesis	0
GO:0022607	0.0782	263	28	5	0	0	cellular component assembly	0
GO:0022613	0.1116	122	9	2	1	1	ribonucleoprotein complex biogenesis	0
GO:0022804	0.1213	734	121	44	4	1	active transmembrane transporter activity	0
GO:0022857	0.1289	1666	271	75	7	0	transmembrane transporter activity	0
GO:0022890	0.1226	420	95	30	14	0	inorganic cation transmembrane transporter activity	0
GO:0022891	0.1273	1204	197	73	11	0	substrate-specific transmembrane transporter activity	0
GO:0022892	0.1256	1328	214	79	9	0	substrate-specific transporter activity	0
GO:0022900	0.2002	179	53	18	6	1	electron transport chain	0
GO:0022904	0.1249	88	14	0	0	0	respiratory electron transport chain	0
GO:0023014	0.0376	173	19	4	2	2	signal transduction by phosphorylation	0
GO:0023052	0.0718	522	138	69	30	8	signaling	0
GO:0030001	0.1012	198	34	21	11	6	metal ion transport	0
GO:0030003	0.0303	21	6	4	2	2	cellular cation homeostasis	0
GO:0030030	0.0554	75	1	0	0	0	cell projection organization	0
GO:0030031	0.0487	30	0	0	0	0	cell projection assembly	0
GO:0030091	0.1253	17	4	4	2	2	protein repair	0
GO:0030145	0.031	5	0	0	0	0	manganese ion binding	0
GO:0030170	0.0698	88	5	4	2	2	pyridoxal phosphate binding	0
GO:0030203	0.127	99	26	16	7	2	glycosaminoglycan metabolic process	0
GO:0030246	0.0174	11	0	0	0	0	carbohydrate binding	0
GO:0030288	0.0278	28	5	1	0	0	outer membrane-bounded periplasmic space	0
GO:0030312	0.0496	312	41	14	5	3	external encapsulating structure	0
GO:0030313	0.0559	311	41	17	5	3	cell envelope	0
GO:0030529	0.2293	707	214	115	74	51	ribonucleoprotein complex	0
GO:0030554	0.2182	4631	748	200	35	16	adenyl nucleotide binding	0
GO:0030694	0.3872	45	5	0	0	0	bacterial-type flagellum basal body, rod	0
GO:0031224	0.1943	4631	1370	291	21	1	intrinsic component of membrane	0
GO:0031323	0.0646	1379	166	27	6	1	regulation of cellular metabolic process	0
GO:0031326	0.0622	1290	152	28	6	1	regulation of cellular biosynthetic process	0
GO:0031418	0.1017	3	0	0	0	0	L-ascorbic acid binding	0
GO:0031668	0.0434	2	0	0	0	0	cellular response to extracellular stimulus	0
GO:0031975	0.0557	311	41	17	5	3	envelope	0
GO:0032196	0.092	137	38	21	2	2	transposition	0
GO:0032259	0.0457	106	0	0	0	0	methylation	0
GO:0032262	0.1197	2	0	0	0	0	pyrimidine nucleotide salvage	0
GO:0032268	0.0835	39	9	5	1	0	regulation of cellular protein metabolic process	0
GO:0032324	0.1271	45	13	6	4	3	molybdopterin cofactor biosynthetic process	0
GO:0032392	0.1391	30	0	0	0	0	DNA geometric change	0
GO:0032502	0.0968	121	23	16	10	3	developmental process	0
GO:0032506	0.0256	6	2	1	0	0	cytokinetic process	0
GO:0032508	0.1391	30	0	0	0	0	DNA duplex unwinding	0
GO:0032549	0.2442	4631	927	262	99	17	ribonucleoside binding	0
GO:0032550	0.2409	4631	926	260	87	20	purine ribonucleoside binding	0
GO:0032553	0.2405	4631	925	261	87	20	ribonucleotide binding	0
GO:0032555	0.2394	4631	946	260	87	20	purine ribonucleotide binding	0
GO:0032559	0.2161	4631	728	201	35	16	adenyl ribonucleotide binding	0
GO:0032561	0.0477	69	0	0	0	0	guanyl ribonucleotide binding	0
GO:0032774	0.062	1267	176	24	4	1	RNA biosynthetic process	0
GO:0032784	0.0452	3	0	0	0	0	regulation of DNA-templated transcription, elongation	0
GO:0032787	0.0765	111	22	14	9	4	monocarboxylic acid metabolic process	0
GO:0032940	0.0396	52	9	1	0	0	secretion by cell	0
GO:0032984	0.0598	9	0	0	0	0	macromolecular complex disassembly	0
GO:0032989	0.2292	119	23	16	10	3	cellular component morphogenesis	0
GO:0032991	0.1741	1264	323	157	90	61	macromolecular complex	0
GO:0033013	0.2876	358	97	44	26	21	tetrapyrrole metabolic process	0
GO:0033014	0.3002	388	91	49	26	21	tetrapyrrole biosynthetic process	0
GO:0033036	0.0656	381	34	8	3	2	macromolecule localization	0
GO:0033037	0.0589	10	3	2	1	1	polysaccharide localization	0
GO:0033178	0.2552	86	20	7	2	2	proton-transporting two-sector ATPase complex, catalytic domain	0
GO:0033212	0.1111	19	6	3	1	1	iron assimilation	0
GO:0033214	0.1189	19	6	3	1	1	iron assimilation by chelation and transport	0
GO:0033554	0.0756	179	22	10	0	0	cellular response to stress	0
GO:0033692	0.0691	111	11	2	1	1	cellular polysaccharide biosynthetic process	0
GO:0033865	0.094	16	0	0	0	0	nucleoside bisphosphate metabolic process	0
GO:0033866	0.1055	18	0	0	0	0	nucleoside bisphosphate biosynthetic process	0
GO:0033875	0.094	16	0	0	0	0	ribonucleoside bisphosphate metabolic process	0
GO:0034030	0.1055	18	0	0	0	0	ribonucleoside bisphosphate biosynthetic process	0
GO:0034032	0.094	16	0	0	0	0	purine nucleoside bisphosphate metabolic process	0
GO:0034033	0.1055	18	0	0	0	0	purine nucleoside bisphosphate biosynthetic process	0
GO:0034062	0.0548	19	3	1	0	0	RNA polymerase activity	0
GO:0034220	0.0999	309	101	29	11	8	ion transmembrane transport	0
GO:0034470	0.1655	507	45	2	1	1	ncRNA processing	0
GO:0034637	0.0664	107	10	2	1	1	cellular carbohydrate biosynthetic process	0
GO:0034641	0.3128	4631	3089	906	318	21	cellular nitrogen compound metabolic process	0
GO:0034645	0.1623	4631	797	264	141	64	cellular macromolecule biosynthetic process	0
GO:0034654	0.1016	2971	343	55	9	0	nucleobase-containing compound biosynthetic process	0
GO:0034655	0.0827	537	9	4	2	2	nucleobase-containing compound catabolic process	0
GO:0034660	0.2732	837	128	53	22	5	ncRNA metabolic process	0
GO:0035383	0.1082	20	3	2	1	1	thioester metabolic process	0
GO:0035435	0.5421	13	3	0	0	0	phosphate ion transmembrane transport	0
GO:0035556	0.0451	251	26	6	0	0	intracellular signal transduction	0
GO:0035639	0.2411	4631	926	260	87	20	purine ribonucleoside triphosphate binding	0
GO:0036094	0.2763	4631	1433	351	116	20	small molecule binding	0
GO:0036211	0.0263	4	0	0	0	0	protein modification process	0
GO:0036442	0.1268	46	0	0	0	0	hydrogen-exporting ATPase activity	0
GO:0038023	0.0373	173	19	4	2	2	signaling receptor activity	0
GO:0040011	0.223	279	82	45	15	0	locomotion	0
GO:0040012	0.0071	8	0	0	0	0	regulation of locomotion	0
GO:0040029	0.0925	44	0	0	0	0	regulation of gene expression, epigenetic	0
GO:0042126	0.116	13	2	0	0	0	nitrate metabolic process	0
GO:0042168	0.1846	49	7	1	0	0	heme metabolic process	0
GO:0042180	0.0705	45	0	0	0	0	cellular ketone metabolic process	0
GO:0042181	0.1033	2	0	0	0	0	ketone biosynthetic process	0
GO:0042221	0.0265	83	0	0	0	0	response to chemical	0
GO:0042254	0.1116	122	9	2	1	1	ribosome biogenesis	0
GO:0042278	0.1167	995	50	10	3	2	purine nucleoside metabolic process	0
GO:0042330	0.0533	96	0	0	0	0	taxis	0
GO:0042357	0.0396	9	2	1	0	0	thiamine diphosphate metabolic process	0
GO:0042364	0.2773	418	88	45	30	21	water-soluble vitamin biosynthetic process	0
GO:0042401	0.0898	14	0	0	0	0	cellular biogenic amine biosynthetic process	0
GO:0042402	0.0205	2	0	0	0	0	cellular biogenic amine catabolic process	0
GO:0042430	0.1224	16	0	0	0	0	indole-containing compound metabolic process	0
GO:0042435	0.1815	13	0	0	0	0	indole-containing compound biosynthetic process	0
GO:0042436	0.0293	3	0	0	0	0	indole-containing compound catabolic process	0
GO:0042439	0.0956	21	0	0	0	0	ethanolamine-containing compound metabolic process	0
GO:0042440	0.0808	61	2	1	0	0	pigment metabolic process	0
GO:0042451	0.1643	300	38	16	6	2	purine nucleoside biosynthetic process	0
GO:0042454	0.0783	392	6	4	2	2	ribonucleoside catabolic process	0
GO:0042455	0.1648	441	50	17	5	1	ribonucleoside biosynthetic process	0
GO:0042537	0.0301	5	0	0	0	0	benzene-containing compound metabolic process	0
GO:0042546	0.3585	96	26	16	8	2	cell wall biogenesis	0
GO:0042578	0.0268	5	0	0	0	0	phosphoric ester hydrolase activity	0
GO:0042592	0.0225	24	3	2	1	1	homeostatic process	0
GO:0042597	0.026	20	5	3	0	0	periplasmic space	0
GO:0042623	0.1168	587	91	6	0	0	ATPase activity, coupled	0
GO:0042625	0.2613	224	83	29	12	6	ATPase activity, coupled to transmembrane movement of ions	0
GO:0042626	0.1265	344	68	38	13	7	ATPase activity, coupled to transmembrane movement of substances	0
GO:0042723	0.0605	22	1	0	0	0	thiamine-containing compound metabolic process	0
GO:0042724	0.0969	35	2	1	0	0	thiamine-containing compound biosynthetic process	0
GO:0042726	0.2531	39	12	8	3	2	flavin-containing compound metabolic process	0
GO:0042727	0.2531	39	12	8	3	2	flavin-containing compound biosynthetic process	0
GO:0042773	0.2645	59	8	1	0	0	ATP synthesis coupled electron transport	0
GO:0042777	0.4614	194	73	22	10	6	plasma membrane ATP synthesis coupled proton transport	0
GO:0042822	0.0403	19	0	0	0	0	pyridoxal phosphate metabolic process	0
GO:0042823	0.0403	19	0	0	0	0	pyridoxal phosphate biosynthetic process	0
GO:0042927	0.1189	19	6	3	1	1	siderophore transporter activity	0
GO:0042995	0.1268	193	56	31	9	0	cell projection	0
GO:0043038	0.5388	189	61	29	20	10	amino acid activation	0
GO:0043039	0.5388	189	61	29	20	10	tRNA aminoacylation	0
GO:0043094	0.1306	25	1	0	0	0	cellular metabolic compound salvage	0
GO:0043102	0.0896	13	3	2	1	1	amino acid salvage	0
GO:0043115	0.1946	1	0	0	0	0	precorrin-2 dehydrogenase activity	0
GO:0043167	0.3663	4631	3818	880	222	22	ion binding	0
GO:0043168	0.2725	4631	1376	354	104	21	anion binding	0
GO:0043169	0.1907	4629	392	2	0	0	cation binding	0
GO:0043170	0.3006	4631	2911	901	324	106	macromolecule metabolic process	0
GO:0043225	0.0839	12	3	2	1	1	anion transmembrane-transporting ATPase activity	0
GO:0043226	0.2306	1374	334	182	107	64	organelle	0
GO:0043228	0.2425	1344	343	180	107	64	non-membrane-bounded organelle	0
GO:0043229	0.2311	1374	334	182	107	64	intracellular organelle	0
GO:0043232	0.2425	1344	343	180	107	64	intracellular non-membrane-bounded organelle	0
GO:0043234	0.0687	367	48	15	9	5	protein complex	0
GO:0043241	0.0598	9	0	0	0	0	protein complex disassembly	0
GO:0043412	0.083	584	22	2	1	1	macromolecule modification	0
GO:0043414	0.0549	30	0	0	0	0	macromolecule methylation	0
GO:0043419	0.5394	15	4	1	0	0	urea catabolic process	0
GO:0043436	0.2926	3068	470	216	107	38	oxoacid metabolic process	0
GO:0043492	0.1265	344	68	38	13	7	ATPase activity, coupled to movement of substances	0
GO:0043545	0.1271	45	13	6	4	3	molybdopterin cofactor metabolic process	0
GO:0043565	0.0196	49	0	0	0	0	sequence-specific DNA binding	0
GO:0043603	0.0714	51	16	6	2	2	cellular amide metabolic process	0
GO:0043605	0.2337	25	0	0	0	0	cellular amide catabolic process	0
GO:0043606	0.3881	21	2	0	0	0	formamide metabolic process	0
GO:0043648	0.1351	117	0	0	0	0	dicarboxylic acid metabolic process	0
GO:0043650	0.1947	83	0	0	0	0	dicarboxylic acid biosynthetic process	0
GO:0043933	0.0355	15	0	0	0	0	macromolecular complex subunit organization	0
GO:0044036	0.1064	94	26	16	9	2	cell wall macromolecule metabolic process	0
GO:0044038	0.3908	96	26	16	8	2	cell wall macromolecule biosynthetic process	0
GO:0044042	0.1184	11	0	0	0	0	glucan metabolic process	0
GO:0044085	0.1319	654	87	23	8	2	cellular component biogenesis	0
GO:0044106	0.078	26	0	0	0	0	cellular amine metabolic process	0
GO:0044205	0.2956	38	8	2	1	1	'de novo' UMP biosynthetic process	0
GO:0044206	0.1197	2	0	0	0	0	UMP salvage	0
GO:0044237	0.5007	4631	4631	2845	1184	378	cellular metabolic process	0
GO:0044238	0.4686	4631	4631	2361	916	260	primary metabolic process	0
GO:0044248	0.1022	1199	7	4	2	2	cellular catabolic process	0
GO:0044249	0.3057	4631	2446	920	383	135	cellular biosynthetic process	0
GO:0044255	0.0868	328	49	24	1	0	cellular lipid metabolic process	0
GO:0044257	0.0642	8	0	0	0	0	cellular protein catabolic process	0
GO:0044260	0.2634	4631	2112	688	302	101	cellular macromolecule metabolic process	0
GO:0044262	0.0546	108	6	2	1	1	cellular carbohydrate metabolic process	0
GO:0044264	0.0584	109	9	2	1	1	cellular polysaccharide metabolic process	0
GO:0044267	0.2204	1970	412	185	107	67	cellular protein metabolic process	0
GO:0044270	0.0832	682	9	4	2	2	cellular nitrogen compound catabolic process	0
GO:0044271	0.153	4630	633	185	63	0	cellular nitrogen compound biosynthetic process	0
GO:0044281	0.356	4631	1533	518	268	76	small molecule metabolic process	0
GO:0044282	0.0765	170	2	1	0	0	small molecule catabolic process	0
GO:0044283	0.2822	2130	385	175	70	23	small molecule biosynthetic process	0
GO:0044391	0.2002	146	30	1	0	0	ribosomal subunit	0
GO:0044422	0.1777	445	99	30	0	0	organelle part	0
GO:0044423	0.0613	128	3	0	0	0	virion part	0
GO:0044424	0.3298	4631	1444	546	234	87	intracellular part	0
GO:0044425	0.2011	4631	1463	334	22	1	membrane part	0
GO:0044427	0.1102	106	2	0	0	0	chromosomal part	0
GO:0044444	0.2	794	214	109	73	51	cytoplasmic part	0
GO:0044446	0.1107	258	28	1	0	0	intracellular organelle part	0
GO:0044461	0.4127	172	53	29	8	0	bacterial-type flagellum part	0
GO:0044462	0.0453	243	20	9	5	4	external encapsulating structure part	0
GO:0044463	0.4127	172	53	29	8	0	cell projection part	0
GO:0044464	0.3453	4631	3431	1060	303	116	cell part	0
GO:0044699	0.5069	4631	4631	3155	905	113	single-organism process	0
GO:0044700	0.0718	522	138	69	30	8	single organism signaling	0
GO:0044710	0.4341	4631	4631	1556	518	61	single-organism metabolic process	0
GO:0044711	0.3103	4631	982	423	190	51	single-organism biosynthetic process	0
GO:0044712	0.1094	1372	6	4	2	2	single-organism catabolic process	0
GO:0044718	0.1283	19	6	3	1	1	siderophore transmembrane transport	0
GO:0044723	0.1173	606	97	22	0	0	single-organism carbohydrate metabolic process	0
GO:0044724	0.0993	85	2	1	0	0	single-organism carbohydrate catabolic process	0
GO:0044728	0.0925	44	0	0	0	0	DNA methylation or demethylation	0
GO:0044763	0.4072	4631	4631	1387	480	106	single-organism cellular process	0
GO:0044765	0.1391	3584	385	116	25	0	single-organism transport	0
GO:0044767	0.1184	120	23	16	10	3	single-organism developmental process	0
GO:0044769	0.4064	194	73	22	10	6	ATPase activity, coupled to transmembrane movement of ions, rotational mechanism	0
GO:0044780	0.0821	31	0	0	0	0	bacterial-type flagellum assembly	0
GO:0044781	0.1113	74	0	0	0	0	bacterial-type flagellum organization	0
GO:0045184	0.0565	267	30	8	2	2	establishment of protein localization	0
GO:0045226	0.027	7	0	0	0	0	extracellular polysaccharide biosynthetic process	0
GO:0045259	0.2008	80	23	9	5	4	proton-transporting ATP synthase complex	0
GO:0045261	0.2333	40	13	4	2	2	proton-transporting ATP synthase complex, catalytic core F(1)	0
GO:0045263	0.0561	2	0	0	0	0	proton-transporting ATP synthase complex, coupling factor F(o)	0
GO:0045333	0.1163	205	20	3	0	0	cellular respiration	0
GO:0046034	0.0934	560	44	4	2	2	ATP metabolic process	0
GO:0046039	0.0635	8	0	0	0	0	GTP metabolic process	0
GO:0046040	0.3469	85	16	8	3	2	IMP metabolic process	0
GO:0046049	0.1593	37	10	2	1	1	UMP metabolic process	0
GO:0046085	0.0713	4	0	0	0	0	adenosine metabolic process	0
GO:0046112	0.2319	37	5	2	0	0	nucleobase biosynthetic process	0
GO:0046116	0.117	19	0	0	0	0	queuosine metabolic process	0
GO:0046128	0.1163	962	53	10	3	2	purine ribonucleoside metabolic process	0
GO:0046129	0.1643	300	38	16	6	2	purine ribonucleoside biosynthetic process	0
GO:0046130	0.0823	399	6	4	2	2	purine ribonucleoside catabolic process	0
GO:0046131	0.106	37	4	0	0	0	pyrimidine ribonucleoside metabolic process	0
GO:0046132	0.1096	35	4	0	0	0	pyrimidine ribonucleoside biosynthetic process	0
GO:0046134	0.1096	35	4	0	0	0	pyrimidine nucleoside biosynthetic process	0
GO:0046148	0.0899	59	2	1	0	0	pigment biosynthetic process	0
GO:0046218	0.0293	3	0	0	0	0	indolalkylamine catabolic process	0
GO:0046219	0.1815	13	0	0	0	0	indolalkylamine biosynthetic process	0
GO:0046351	0.0899	17	3	0	0	0	disaccharide biosynthetic process	0
GO:0046365	0.0966	84	2	1	0	0	monosaccharide catabolic process	0
GO:0046373	0.0571	7	0	0	0	0	L-arabinose metabolic process	0
GO:0046379	0.027	7	0	0	0	0	extracellular polysaccharide metabolic process	0
GO:0046385	0.2808	23	3	1	1	1	deoxyribose phosphate biosynthetic process	0
GO:0046390	0.2035	500	69	31	13	1	ribose phosphate biosynthetic process	0
GO:0046394	0.2414	1021	233	98	56	17	carboxylic acid biosynthetic process	0
GO:0046395	0.083	134	13	3	1	1	carboxylic acid catabolic process	0
GO:0046400	0.1281	14	0	0	0	0	keto-3-deoxy-D-manno-octulosonic acid metabolic process	0
GO:0046417	0.136	35	0	0	0	0	chorismate metabolic process	0
GO:0046434	0.0867	581	6	4	2	2	organophosphate catabolic process	0
GO:0046451	0.0718	6	0	0	0	0	diaminopimelate metabolic process	0
GO:0046467	0.1116	45	3	0	0	0	membrane lipid biosynthetic process	0
GO:0046483	0.3134	4631	3066	928	355	22	heterocycle metabolic process	0
GO:0046490	0.5428	59	14	10	6	4	isopentenyl diphosphate metabolic process	0
GO:0046493	0.1504	44	3	0	0	0	lipid A metabolic process	0
GO:0046496	0.0515	9	0	0	0	0	nicotinamide nucleotide metabolic process	0
GO:0046501	0.2195	18	2	1	0	0	protoporphyrinogen IX metabolic process	0
GO:0046700	0.0827	647	9	4	2	2	heterocycle catabolic process	0
GO:0046872	0.1862	4629	226	1	0	0	metal ion binding	0
GO:0046873	0.0991	167	25	7	1	0	metal ion transmembrane transporter activity	0
GO:0046903	0.0388	52	9	1	0	0	secretion	0
GO:0046906	0.0558	181	15	0	0	0	tetrapyrrole binding	0
GO:0046914	0.098	960	54	0	0	0	transition metal ion binding	0
GO:0046915	0.0549	20	4	2	1	1	transition metal ion transmembrane transporter activity	0
GO:0046916	0.0303	21	6	4	2	2	cellular transition metal ion homeostasis	0
GO:0046933	0.4159	194	73	22	10	6	proton-transporting ATP synthase activity, rotational mechanism	0
GO:0046942	0.0502	130	3	1	0	0	carboxylic acid transport	0
GO:0046943	0.0862	83	1	0	0	0	carboxylic acid transmembrane transporter activity	0
GO:0046961	0.1268	46	0	0	0	0	proton-transporting ATPase activity, rotational mechanism	0
GO:0048029	0.1045	7	0	0	0	0	monosaccharide binding	0
GO:0048037	0.1084	1044	124	7	3	2	cofactor binding	0
GO:0048038	0.1786	101	20	12	4	1	quinone binding	0
GO:0048856	0.1313	120	23	16	10	3	anatomical structure development	0
GO:0048869	0.1313	120	23	16	10	3	cellular developmental process	0
GO:0048870	0.3951	223	66	37	15	0	cell motility	0
GO:0048878	0.068	18	6	4	1	1	chemical homeostasis	0
GO:0050136	0.3925	127	42	23	15	10	NADH dehydrogenase (quinone) activity	0
GO:0050661	0.0628	45	0	0	0	0	NADP binding	0
GO:0050662	0.0606	413	0	0	0	0	coenzyme binding	0
GO:0050789	0.1041	2959	327	119	59	12	regulation of biological process	0
GO:0050793	0.2235	107	26	16	10	3	regulation of developmental process	0
GO:0050794	0.0996	2629	313	120	61	13	regulation of cellular process	0
GO:0050801	0.068	18	6	4	1	1	ion homeostasis	0
GO:0050896	0.1106	2319	247	113	51	7	response to stimulus	0
GO:0051082	0.0421	12	0	0	0	0	unfolded protein binding	0
GO:0051119	0.1395	129	27	16	1	1	sugar transmembrane transporter activity	0
GO:0051128	0.1633	114	26	15	8	3	regulation of cellular component organization	0
GO:0051171	0.0582	1178	152	24	6	1	regulation of nitrogen compound metabolic process	0
GO:0051179	0.207	4631	1128	405	182	48	localization	0
GO:0051183	0.2116	54	17	7	1	0	vitamin transporter activity	0
GO:0051186	0.145	872	104	34	3	3	cofactor metabolic process	0
GO:0051188	0.1494	681	106	27	5	3	cofactor biosynthetic process	0
GO:0051189	0.1201	44	13	6	4	3	prosthetic group metabolic process	0
GO:0051213	0.0468	147	10	4	1	1	dioxygenase activity	0
GO:0051234	0.191	4631	1025	324	145	36	establishment of localization	0
GO:0051246	0.0835	39	9	5	1	0	regulation of protein metabolic process	0
GO:0051252	0.0573	1172	152	24	6	1	regulation of RNA metabolic process	0
GO:0051301	0.0818	148	27	17	6	4	cell division	0
GO:0051302	0.0509	10	3	2	1	1	regulation of cell division	0
GO:0051536	0.1496	1090	80	31	3	1	iron-sulfur cluster binding	0
GO:0051537	0.0215	10	3	2	1	1	2 iron, 2 sulfur cluster binding	0
GO:0051539	0.062	63	0	0	0	0	4 iron, 4 sulfur cluster binding	0
GO:0051603	0.0642	8	0	0	0	0	proteolysis involved in cellular protein catabolic process	0
GO:0051607	0.3431	252	89	57	24	7	defense response to virus	0
GO:0051641	0.0445	96	14	1	0	0	cellular localization	0
GO:0051649	0.0478	114	13	0	0	0	establishment of localization in cell	0
GO:0051674	0.3951	223	66	37	15	0	localization of cell	0
GO:0051704	0.0512	433	84	43	28	4	multi-organism process	0
GO:0051707	0.1957	240	83	50	24	5	response to other organism	0
GO:0051716	0.0914	1090	170	76	26	11	cellular response to stimulus	0
GO:0051726	0.1084	10	3	2	1	1	regulation of cell cycle	0
GO:0052689	0.0527	29	9	5	1	0	carboxylic ester hydrolase activity	0
GO:0052803	0.1999	71	16	9	4	3	imidazole-containing compound metabolic process	0
GO:0052805	0.3881	21	2	0	0	0	imidazole-containing compound catabolic process	0
GO:0055065	0.0688	17	6	4	1	1	metal ion homeostasis	0
GO:0055072	0.0309	20	4	4	2	2	iron ion homeostasis	0
GO:0055076	0.0688	17	6	4	1	1	transition metal ion homeostasis	0
GO:0055080	0.0709	21	6	4	1	1	cation homeostasis	0
GO:0055082	0.0277	19	6	4	2	2	cellular chemical homeostasis	0
GO:0055085	0.0645	743	98	31	14	3	transmembrane transport	0
GO:0055086	0.1721	2740	252	59	24	11	nucleobase-containing small molecule metabolic process	0
GO:0055114	0.1956	4631	772	219	34	10	oxidation-reduction process	0
GO:0055129	0.7846	19	6	4	1	1	L-proline biosynthetic process	0
GO:0060089	0.0632	436	107	54	16	6	molecular transducer activity	0
GO:0060255	0.0659	1434	160	31	5	1	regulation of macromolecule metabolic process	0
GO:0061505	0.2769	58	8	0	0	0	DNA topoisomerase II activity	0
GO:0065007	0.1075	3375	338	118	57	13	biological regulation	0
GO:0065008	0.0869	149	36	22	7	2	regulation of biological quality	0
GO:0070008	0.06	3	0	0	0	0	serine-type exopeptidase activity	0
GO:0070011	0.0476	200	0	0	0	0	peptidase activity, acting on L-amino acid peptides	0
GO:0070035	0.1643	53	0	0	0	0	purine NTP-dependent helicase activity	0
GO:0070189	0.0904	5	0	0	0	0	kynurenine metabolic process	0
GO:0070402	0.1167	10	0	0	0	0	NADPH binding	0
GO:0070525	0.0713	4	0	0	0	0	threonylcarbamoyladenosine metabolic process	0
GO:0070526	0.0713	4	0	0	0	0	threonylcarbamoyladenosine biosynthetic process	0
GO:0070589	0.3908	96	26	16	8	2	cellular component macromolecule biosynthetic process	0
GO:0070925	0.0931	31	0	0	0	0	organelle assembly	0
GO:0071103	0.0426	81	2	0	0	0	DNA conformation change	0
GO:0071265	0.0445	9	3	2	1	1	L-methionine biosynthetic process	0
GO:0071267	0.0896	13	3	2	1	1	L-methionine salvage	0
GO:0071496	0.0434	2	0	0	0	0	cellular response to external stimulus	0
GO:0071554	0.0864	95	26	16	9	2	cell wall organization or biogenesis	0
GO:0071702	0.1087	1336	141	54	19	0	organic substance transport	0
GO:0071704	0.5234	4631	4631	3437	1196	387	organic substance metabolic process	0
GO:0071705	0.0334	31	0	0	0	0	nitrogen compound transport	0
GO:0071804	0.2053	13	0	0	0	0	cellular potassium ion transport	0
GO:0071805	0.2053	13	0	0	0	0	potassium ion transmembrane transport	0
GO:0071806	0.0261	17	4	1	0	0	protein transmembrane transport	0
GO:0071822	0.0328	5	0	0	0	0	protein complex subunit organization	0
GO:0071840	0.1162	936	120	22	11	3	cellular component organization or biogenesis	0
GO:0071941	0.2257	148	52	23	16	6	nitrogen cycle metabolic process	0
GO:0071944	0.1382	3765	442	96	21	2	cell periphery	0
GO:0072330	0.0156	18	5	4	2	2	monocarboxylic acid biosynthetic process	0
GO:0072348	0.0254	10	3	2	1	1	sulfur compound transport	0
GO:0072521	0.1318	1241	117	12	5	2	purine-containing compound metabolic process	0
GO:0072522	0.1813	417	51	28	7	2	purine-containing compound biosynthetic process	0
GO:0072523	0.0804	420	6	4	2	2	purine-containing compound catabolic process	0
GO:0072527	0.1111	109	9	1	0	0	pyrimidine-containing compound metabolic process	0
GO:0072528	0.0993	90	9	0	0	0	pyrimidine-containing compound biosynthetic process	0
GO:0080090	0.0648	1400	169	26	6	1	regulation of primary metabolic process	0
GO:0090304	0.1828	4631	1255	304	80	23	nucleic acid metabolic process	0
GO:0090305	0.0568	194	8	5	3	3	nucleic acid phosphodiester bond hydrolysis	0
GO:0090407	0.1626	1371	234	39	10	1	organophosphate biosynthetic process	0
GO:0090482	0.4745	50	14	9	1	0	vitamin transmembrane transporter activity	0
GO:0090529	0.0256	6	2	1	0	0	cell septum assembly	0
GO:0097159	0.3538	4631	4362	1157	396	84	organic cyclic compound binding	0
GO:0097367	0.2434	4631	983	263	101	17	carbohydrate derivative binding	0
GO:0098542	0.2286	240	83	50	24	5	defense response to other organism	0
GO:1901068	0.0695	77	0	0	0	0	guanosine-containing compound metabolic process	0
GO:1901069	0.0635	18	0	0	0	0	guanosine-containing compound catabolic process	0
GO:1901135	0.1859	3398	356	62	8	4	carbohydrate derivative metabolic process	0
GO:1901136	0.0794	416	10	5	2	2	carbohydrate derivative catabolic process	0
GO:1901137	0.1898	1018	201	32	8	2	carbohydrate derivative biosynthetic process	0
GO:1901160	0.0768	21	0	0	0	0	primary amino compound metabolic process	0
GO:1901265	0.2589	4631	1208	314	105	21	nucleoside phosphate binding	0
GO:1901269	0.1504	44	3	0	0	0	lipooligosaccharide metabolic process	0
GO:1901271	0.1504	44	3	0	0	0	lipooligosaccharide biosynthetic process	0
GO:1901292	0.0761	409	6	4	2	2	nucleoside phosphate catabolic process	0
GO:1901293	0.1365	760	102	24	8	5	nucleoside phosphate biosynthetic process	0
GO:1901360	0.322	4631	3191	991	380	26	organic cyclic compound metabolic process	0
GO:1901361	0.0847	684	9	4	2	2	organic cyclic compound catabolic process	0
GO:1901362	0.17	4631	841	278	100	2	organic cyclic compound biosynthetic process	0
GO:1901363	0.3527	4631	4337	1157	395	84	heterocyclic compound binding	0
GO:1901476	0.1455	208	38	21	9	2	carbohydrate transporter activity	0
GO:1901564	0.3638	4631	1481	514	246	63	organonitrogen compound metabolic process	0
GO:1901565	0.0934	815	9	4	2	2	organonitrogen compound catabolic process	0
GO:1901566	0.3624	3964	764	331	163	50	organonitrogen compound biosynthetic process	0
GO:1901575	0.1263	2435	27	5	2	2	organic substance catabolic process	0
GO:1901576	0.31	4631	2488	925	393	133	organic substance biosynthetic process	0
GO:1901605	0.2434	1003	201	69	43	13	alpha-amino acid metabolic process	0
GO:1901606	0.1438	87	12	6	1	1	alpha-amino acid catabolic process	0
GO:1901607	0.2947	618	159	61	41	13	alpha-amino acid biosynthetic process	0
GO:1901615	0.0223	4	0	0	0	0	organic hydroxy compound metabolic process	0
GO:1901657	0.1305	1435	94	16	8	5	glycosyl compound metabolic process	0
GO:1901658	0.0777	401	6	4	2	2	glycosyl compound catabolic process	0
GO:1901659	0.1586	426	50	19	5	1	glycosyl compound biosynthetic process	0
GO:1901661	0.1033	2	0	0	0	0	quinone metabolic process	0
GO:1901663	0.1033	2	0	0	0	0	quinone biosynthetic process	0
GO:1901677	0.2979	28	10	6	1	1	phosphate transmembrane transporter activity	0
GO:1901678	0.0683	17	6	3	1	1	iron coordination entity transport	0
GO:1901682	0.0558	10	3	1	1	1	sulfur compound transmembrane transporter activity	0
GO:1990204	0.0178	8	2	1	0	0	oxidoreductase complex	0
GO:2000112	0.0622	1290	152	28	6	1	regulation of cellular macromolecule biosynthetic process	0
GO:2001057	0.116	13	2	0	0	0	reactive nitrogen species metabolic process	0
GO:2001141	0.0572	1163	152	24	6	1	regulation of RNA biosynthetic process	0
GO:2001293	0.5706	19	6	3	1	1	malonyl-CoA metabolic process	0
GO:2001295	0.5706	19	6	3	1	1	malonyl-CoA biosynthetic process	0

## Sheet: MPP-O__all_predictions
		# of gene families for which a GO term is predicted at Precision≥X%
GO term	AUPRC	0.1	0.3	0.5	0.7	0.9	Description	Highlighted in paper
GO:0009405	0.0863	659	68	4	0	0	pathogenesis	1
GO:0009579	0.41	1254	436	190	2	1	thylakoid	1
GO:0015979	0.3447	1273	407	178	5	1	photosynthesis	1		total COG/NOG gene families analyzed in MPP-O
GO:0016051	0.055	138	23	10	4	1	carbohydrate biosynthetic process	1		14331
GO:0030089	0.4666	386	138	27	9	1	phycobilisome	1
GO:0032196	0.1728	406	83	28	7	0	transposition	1
GO:0034357	0.41	1254	436	190	2	1	photosynthetic membrane	1
GO:0048870	0.1472	307	57	7	0	0	cell motility	1
GO:0000049	0.1039	100	5	1	0	0	tRNA binding	0
GO:0000096	0.0347	16	0	0	0	0	sulfur amino acid metabolic process	0
GO:0000097	0.0668	18	0	0	0	0	sulfur amino acid biosynthetic process	0
GO:0000105	0.2579	47	11	7	1	0	histidine biosynthetic process	0
GO:0000155	0.0299	24	0	0	0	0	phosphorelay sensor kinase activity	0
GO:0000160	0.0554	58	0	0	0	0	phosphorelay signal transduction system	0
GO:0000162	0.1654	24	1	0	0	0	tryptophan biosynthetic process	0
GO:0000166	0.188	23911	775	87	8	2	nucleotide binding	0
GO:0000178	0.2073	16	0	0	0	0	exosome (RNase complex)	0
GO:0000255	0.2249	36	2	0	0	0	allantoin metabolic process	0
GO:0000256	0.1061	20	0	0	0	0	allantoin catabolic process	0
GO:0000270	0.0397	51	2	0	0	0	peptidoglycan metabolic process	0
GO:0000271	0.0541	131	21	9	3	1	polysaccharide biosynthetic process	0
GO:0000287	0.0517	24	0	0	0	0	magnesium ion binding	0
GO:0000738	0.2868	7	0	0	0	0	DNA catabolic process, exonucleolytic	0
GO:0000902	0.0846	77	3	0	0	0	cell morphogenesis	0
GO:0000910	0.0409	41	6	1	0	0	cytokinesis	0
GO:0000917	0.0578	46	6	1	0	0	barrier septum assembly	0
GO:0001071	0.0554	448	1	0	0	0	nucleic acid binding transcription factor activity	0
GO:0001514	0.1387	4	0	0	0	0	selenocysteine incorporation	0
GO:0001539	0.1495	305	57	7	0	0	ciliary or bacterial-type flagellar motility	0
GO:0001882	0.1625	7556	419	66	4	3	nucleoside binding	0
GO:0001883	0.1615	7381	430	65	4	3	purine nucleoside binding	0
GO:0002161	0.0728	9	2	1	0	0	aminoacyl-tRNA editing activity	0
GO:0002252	0.1312	118	28	14	2	0	immune effector process	0
GO:0002376	0.1164	109	28	14	2	0	immune system process	0
GO:0003676	0.2566	27818	2840	154	51	18	nucleic acid binding	0
GO:0003677	0.1978	27818	352	52	18	1	DNA binding	0
GO:0003700	0.0552	455	1	0	0	0	sequence-specific DNA binding transcription factor activity	0
GO:0003723	0.1592	1347	176	50	30	18	RNA binding	0
GO:0003735	0.3274	1108	212	98	51	17	structural constituent of ribosome	0
GO:0003774	0.2171	161	39	0	0	0	motor activity	0
GO:0003824	0.6626	27818	27818	27818	4980	103	catalytic activity	0
GO:0003913	0.5455	20	3	1	0	0	DNA photolyase activity	0
GO:0003916	0.04	11	0	0	0	0	DNA topoisomerase activity	0
GO:0003918	0.1382	11	0	0	0	0	DNA topoisomerase type II (ATP-hydrolyzing) activity	0
GO:0003954	0.2124	108	31	19	11	2	NADH dehydrogenase activity	0
GO:0004175	0.0212	47	0	0	0	0	endopeptidase activity	0
GO:0004197	0.0507	2	0	0	0	0	cysteine-type endopeptidase activity	0
GO:0004252	0.03	22	7	5	1	1	serine-type endopeptidase activity	0
GO:0004333	0.0867	17	5	2	0	0	fumarate hydratase activity	0
GO:0004375	0.2501	19	3	2	1	1	glycine dehydrogenase (decarboxylating) activity	0
GO:0004386	0.0643	147	15	1	0	0	helicase activity	0
GO:0004497	0.02	12	0	0	0	0	monooxygenase activity	0
GO:0004518	0.0634	423	26	11	6	5	nuclease activity	0
GO:0004519	0.0465	186	12	3	0	0	endonuclease activity	0
GO:0004527	0.0468	123	25	15	6	4	exonuclease activity	0
GO:0004553	0.0497	186	0	0	0	0	hydrolase activity, hydrolyzing O-glycosyl compounds	0
GO:0004672	0.03	61	0	0	0	0	protein kinase activity	0
GO:0004673	0.028	25	0	0	0	0	protein histidine kinase activity	0
GO:0004733	0.0394	17	0	0	0	0	pyridoxamine-phosphate oxidase activity	0
GO:0004774	0.1976	3	0	0	0	0	succinate-CoA ligase activity	0
GO:0004775	0.1976	3	0	0	0	0	succinate-CoA ligase (ADP-forming) activity	0
GO:0004803	0.1757	339	70	28	2	0	transposase activity	0
GO:0004812	0.1764	166	43	22	3	2	aminoacyl-tRNA ligase activity	0
GO:0004834	0.311	8	0	0	0	0	tryptophan synthase activity	0
GO:0004871	0.0545	373	16	3	0	0	signal transducer activity	0
GO:0004872	0.0443	84	6	0	0	0	receptor activity	0
GO:0005198	0.2528	1227	232	107	50	17	structural molecule activity	0
GO:0005215	0.1138	6298	112	20	5	2	transporter activity	0
GO:0005315	0.4148	39	13	6	2	1	inorganic phosphate transmembrane transporter activity	0
GO:0005351	0.0954	47	10	7	3	2	sugar:hydrogen symporter activity	0
GO:0005402	0.0954	47	10	7	3	2	cation:sugar symporter activity	0
GO:0005488	0.4572	27818	27818	3726	279	13	binding	0
GO:0005506	0.0308	98	3	2	1	1	iron ion binding	0
GO:0005524	0.1459	5791	208	12	2	0	ATP binding	0
GO:0005576	0.0426	180	1	0	0	0	extracellular region	0
GO:0005618	0.0813	212	15	8	1	0	cell wall	0
GO:0005622	0.2812	23895	2080	650	189	27	intracellular	0
GO:0005623	0.306	27818	4827	847	217	41	cell	0
GO:0005694	0.0809	184	0	0	0	0	chromosome	0
GO:0005727	0.0181	2	0	0	0	0	extrachromosomal circular DNA	0
GO:0005737	0.2736	9683	1094	363	93	33	cytoplasm	0
GO:0005773	0.0804	11	0	0	0	0	vacuole	0
GO:0005840	0.2833	1164	221	107	52	16	ribosome	0
GO:0005886	0.1074	3023	151	63	23	5	plasma membrane	0
GO:0005975	0.0966	1916	42	9	1	1	carbohydrate metabolic process	0
GO:0005976	0.0509	105	17	9	3	1	polysaccharide metabolic process	0
GO:0005996	0.024	2	0	0	0	0	monosaccharide metabolic process	0
GO:0006006	0.0223	3	0	0	0	0	glucose metabolic process	0
GO:0006022	0.0377	50	2	0	0	0	aminoglycan metabolic process	0
GO:0006023	0.1377	47	2	0	0	0	aminoglycan biosynthetic process	0
GO:0006024	0.1377	47	2	0	0	0	glycosaminoglycan biosynthetic process	0
GO:0006073	0.0879	24	0	0	0	0	cellular glucan metabolic process	0
GO:0006081	0.1977	38	7	0	0	0	cellular aldehyde metabolic process	0
GO:0006082	0.1868	2680	277	98	2	2	organic acid metabolic process	0
GO:0006084	0.1554	47	0	0	0	0	acetyl-CoA metabolic process	0
GO:0006089	0.3971	9	0	0	0	0	lactate metabolic process	0
GO:0006090	0.225	38	8	1	0	0	pyruvate metabolic process	0
GO:0006091	0.0745	598	14	8	0	0	generation of precursor metabolites and energy	0
GO:0006099	0.0933	41	1	0	0	0	tricarboxylic acid cycle	0
GO:0006105	0.2025	2	0	0	0	0	succinate metabolic process	0
GO:0006139	0.264	27818	2727	306	1	1	nucleobase-containing compound metabolic process	0
GO:0006144	0.1105	8	1	0	0	0	purine nucleobase metabolic process	0
GO:0006163	0.0683	697	2	0	0	0	purine nucleotide metabolic process	0
GO:0006164	0.0638	104	0	0	0	0	purine nucleotide biosynthetic process	0
GO:0006259	0.1203	3387	118	48	20	3	DNA metabolic process	0
GO:0006260	0.0625	185	0	0	0	0	DNA replication	0
GO:0006261	0.0294	10	0	0	0	0	DNA-dependent DNA replication	0
GO:0006265	0.0414	11	0	0	0	0	DNA topological change	0
GO:0006268	0.4077	16	0	0	0	0	DNA unwinding involved in DNA replication	0
GO:0006281	0.0465	60	0	0	0	0	DNA repair	0
GO:0006304	0.028	40	3	0	0	0	DNA modification	0
GO:0006310	0.1048	575	85	32	4	0	DNA recombination	0
GO:0006313	0.1744	405	83	28	7	0	transposition, DNA-mediated	0
GO:0006323	0.0246	11	0	0	0	0	DNA packaging	0
GO:0006351	0.1287	18812	33	12	8	4	transcription, DNA-templated	0
GO:0006355	0.1291	17572	38	12	8	4	regulation of transcription, DNA-templated	0
GO:0006364	0.0333	3	0	0	0	0	rRNA processing	0
GO:0006396	0.068	183	0	0	0	0	RNA processing	0
GO:0006399	0.1232	377	43	13	6	3	tRNA metabolic process	0
GO:0006401	0.0234	4	0	0	0	0	RNA catabolic process	0
GO:0006412	0.2717	1689	308	127	62	17	translation	0
GO:0006414	0.0193	9	2	1	0	0	translational elongation	0
GO:0006417	0.0235	9	2	1	0	0	regulation of translation	0
GO:0006418	0.2855	169	39	18	3	2	tRNA aminoacylation for protein translation	0
GO:0006448	0.0438	9	2	1	0	0	regulation of translational elongation	0
GO:0006450	0.048	9	2	1	0	0	regulation of translational fidelity	0
GO:0006451	0.1387	4	0	0	0	0	translational readthrough	0
GO:0006464	0.0703	384	117	40	10	0	cellular protein modification process	0
GO:0006508	0.0375	53	0	0	0	0	proteolysis	0
GO:0006520	0.2103	1651	238	85	2	2	cellular amino acid metabolic process	0
GO:0006546	0.1079	2	0	0	0	0	glycine catabolic process	0
GO:0006547	0.1919	47	12	7	1	0	histidine metabolic process	0
GO:0006555	0.0768	18	0	0	0	0	methionine metabolic process	0
GO:0006560	0.2091	18	1	0	0	0	proline metabolic process	0
GO:0006561	0.2091	18	1	0	0	0	proline biosynthetic process	0
GO:0006568	0.0735	19	0	0	0	0	tryptophan metabolic process	0
GO:0006576	0.0301	11	0	0	0	0	cellular biogenic amine metabolic process	0
GO:0006586	0.0735	19	0	0	0	0	indolalkylamine metabolic process	0
GO:0006629	0.0676	427	49	3	0	0	lipid metabolic process	0
GO:0006637	0.1366	48	0	0	0	0	acyl-CoA metabolic process	0
GO:0006643	0.0614	30	8	0	0	0	membrane lipid metabolic process	0
GO:0006644	0.1167	162	36	9	1	0	phospholipid metabolic process	0
GO:0006664	0.0667	30	8	0	0	0	glycolipid metabolic process	0
GO:0006720	0.0549	40	0	0	0	0	isoprenoid metabolic process	0
GO:0006721	0.0739	47	0	0	0	0	terpenoid metabolic process	0
GO:0006725	0.2954	27818	4141	551	25	7	cellular aromatic compound metabolic process	0
GO:0006730	0.0367	13	0	0	0	0	one-carbon metabolic process	0
GO:0006732	0.0694	299	0	0	0	0	coenzyme metabolic process	0
GO:0006753	0.0991	1550	0	0	0	0	nucleoside phosphate metabolic process	0
GO:0006754	0.0637	37	7	0	0	0	ATP biosynthetic process	0
GO:0006766	0.2072	396	67	38	22	15	vitamin metabolic process	0
GO:0006767	0.2072	396	67	38	22	15	water-soluble vitamin metabolic process	0
GO:0006768	0.0822	17	0	0	0	0	biotin metabolic process	0
GO:0006772	0.078	37	7	1	0	0	thiamine metabolic process	0
GO:0006777	0.2405	43	14	7	0	0	Mo-molybdopterin cofactor biosynthetic process	0
GO:0006778	0.0923	63	11	0	0	0	porphyrin-containing compound metabolic process	0
GO:0006779	0.1064	61	11	0	0	0	porphyrin-containing compound biosynthetic process	0
GO:0006782	0.1304	17	0	0	0	0	protoporphyrinogen IX biosynthetic process	0
GO:0006783	0.1027	20	6	2	1	1	heme biosynthetic process	0
GO:0006790	0.0535	62	6	0	0	0	sulfur compound metabolic process	0
GO:0006793	0.1465	7414	230	33	15	6	phosphorus metabolic process	0
GO:0006796	0.1338	6653	132	6	0	0	phosphate-containing compound metabolic process	0
GO:0006807	0.339	27818	6874	1014	288	21	nitrogen compound metabolic process	0
GO:0006810	0.1621	27818	241	49	14	11	transport	0
GO:0006811	0.0674	366	48	24	12	7	ion transport	0
GO:0006812	0.0684	189	44	21	11	5	cation transport	0
GO:0006814	0.1834	73	22	13	9	5	sodium ion transport	0
GO:0006817	0.2686	38	11	6	2	1	phosphate ion transport	0
GO:0006818	0.0679	50	16	8	2	1	hydrogen transport	0
GO:0006820	0.0341	40	12	6	3	2	anion transport	0
GO:0006928	0.1387	401	74	7	0	0	cellular component movement	0
GO:0006935	0.0458	29	0	0	0	0	chemotaxis	0
GO:0006950	0.0495	249	0	0	0	0	response to stress	0
GO:0006952	0.0512	100	21	15	4	0	defense response	0
GO:0006974	0.0445	60	0	0	0	0	cellular response to DNA damage stimulus	0
GO:0006996	0.0317	80	0	0	0	0	organelle organization	0
GO:0007049	0.0342	74	0	0	0	0	cell cycle	0
GO:0007059	0.0645	2	0	0	0	0	chromosome segregation	0
GO:0007154	0.0556	426	30	9	5	4	cell communication	0
GO:0007165	0.0586	504	31	9	5	4	signal transduction	0
GO:0008094	0.0414	8	0	0	0	0	DNA-dependent ATPase activity	0
GO:0008104	0.0512	258	0	0	0	0	protein localization	0
GO:0008135	0.0357	9	0	0	0	0	translation factor activity, nucleic acid binding	0
GO:0008137	0.1318	54	13	8	2	2	NADH dehydrogenase (ubiquinone) activity	0
GO:0008152	0.6133	27818	27818	19056	3005	200	metabolic process	0
GO:0008168	0.0987	1180	131	27	2	1	methyltransferase activity	0
GO:0008194	0.1064	3	0	0	0	0	UDP-glycosyltransferase activity	0
GO:0008198	0.0507	24	6	2	0	0	ferrous iron binding	0
GO:0008233	0.0403	64	0	0	0	0	peptidase activity	0
GO:0008236	0.0255	22	6	4	1	1	serine-type peptidase activity	0
GO:0008270	0.0376	128	0	0	0	0	zinc ion binding	0
GO:0008299	0.0589	40	0	0	0	0	isoprenoid biosynthetic process	0
GO:0008324	0.048	100	20	7	0	0	cation transmembrane transporter activity	0
GO:0008360	0.0854	48	7	0	0	0	regulation of cell shape	0
GO:0008375	0.0873	9	0	0	0	0	acetylglucosaminyltransferase activity	0
GO:0008410	0.1895	20	3	2	1	1	CoA-transferase activity	0
GO:0008556	0.1799	16	3	1	1	1	potassium-transporting ATPase activity	0
GO:0008610	0.0828	378	38	13	0	0	lipid biosynthetic process	0
GO:0008643	0.0638	140	13	4	0	0	carbohydrate transport	0
GO:0008652	0.1799	739	111	50	11	3	cellular amino acid biosynthetic process	0
GO:0008653	0.0555	46	3	1	0	0	lipopolysaccharide metabolic process	0
GO:0008654	0.1481	158	37	10	3	2	phospholipid biosynthetic process	0
GO:0008757	0.047	38	4	0	0	0	S-adenosylmethionine-dependent methyltransferase activity	0
GO:0008851	0.1704	24	7	5	2	2	ethanolamine ammonia-lyase activity	0
GO:0008901	0.246	20	4	1	0	0	ferredoxin hydrogenase activity	0
GO:0008940	0.358	44	16	4	1	1	nitrate reductase activity	0
GO:0008982	0.1289	79	4	1	0	0	protein-N(PI)-phosphohistidine-sugar phosphotransferase activity	0
GO:0009039	0.6161	31	2	0	0	0	urease activity	0
GO:0009055	0.0578	356	1	0	0	0	electron carrier activity	0
GO:0009056	0.0777	722	19	0	0	0	catabolic process	0
GO:0009058	0.3176	27818	4304	970	306	60	biosynthetic process	0
GO:0009059	0.2086	27818	1035	186	71	25	macromolecule biosynthetic process	0
GO:0009060	0.0493	39	1	0	0	0	aerobic respiration	0
GO:0009064	0.0691	3	0	0	0	0	glutamine family amino acid metabolic process	0
GO:0009066	0.0372	24	0	0	0	0	aspartate family amino acid metabolic process	0
GO:0009067	0.04	24	0	0	0	0	aspartate family amino acid biosynthetic process	0
GO:0009071	0.1079	2	0	0	0	0	serine family amino acid catabolic process	0
GO:0009072	0.0954	27	5	0	0	0	aromatic amino acid family metabolic process	0
GO:0009073	0.1165	44	5	0	0	0	aromatic amino acid family biosynthetic process	0
GO:0009084	0.0802	4	0	0	0	0	glutamine family amino acid biosynthetic process	0
GO:0009086	0.0858	18	0	0	0	0	methionine biosynthetic process	0
GO:0009102	0.0822	17	0	0	0	0	biotin biosynthetic process	0
GO:0009103	0.0565	45	3	1	0	0	lipopolysaccharide biosynthetic process	0
GO:0009108	0.0595	63	0	0	0	0	coenzyme biosynthetic process	0
GO:0009110	0.2153	377	67	38	22	15	vitamin biosynthetic process	0
GO:0009112	0.0432	4	0	0	0	0	nucleobase metabolic process	0
GO:0009116	0.0681	563	0	0	0	0	nucleoside metabolic process	0
GO:0009117	0.0999	1541	0	0	0	0	nucleotide metabolic process	0
GO:0009119	0.0727	435	0	0	0	0	ribonucleoside metabolic process	0
GO:0009123	0.0569	124	0	0	0	0	nucleoside monophosphate metabolic process	0
GO:0009124	0.0652	126	0	0	0	0	nucleoside monophosphate biosynthetic process	0
GO:0009126	0.0445	4	0	0	0	0	purine nucleoside monophosphate metabolic process	0
GO:0009127	0.0564	70	1	0	0	0	purine nucleoside monophosphate biosynthetic process	0
GO:0009141	0.0484	26	1	0	0	0	nucleoside triphosphate metabolic process	0
GO:0009142	0.0568	38	7	0	0	0	nucleoside triphosphate biosynthetic process	0
GO:0009144	0.0464	27	1	0	0	0	purine nucleoside triphosphate metabolic process	0
GO:0009145	0.063	37	7	0	0	0	purine nucleoside triphosphate biosynthetic process	0
GO:0009150	0.0664	406	2	0	0	0	purine ribonucleotide metabolic process	0
GO:0009152	0.0601	84	0	0	0	0	purine ribonucleotide biosynthetic process	0
GO:0009156	0.0636	124	0	0	0	0	ribonucleoside monophosphate biosynthetic process	0
GO:0009161	0.0627	136	0	0	0	0	ribonucleoside monophosphate metabolic process	0
GO:0009165	0.0693	525	0	0	0	0	nucleotide biosynthetic process	0
GO:0009167	0.0445	4	0	0	0	0	purine ribonucleoside monophosphate metabolic process	0
GO:0009168	0.0564	70	1	0	0	0	purine ribonucleoside monophosphate biosynthetic process	0
GO:0009187	0.0397	39	4	1	0	0	cyclic nucleotide metabolic process	0
GO:0009190	0.041	39	4	1	0	0	cyclic nucleotide biosynthetic process	0
GO:0009199	0.0477	26	1	0	0	0	ribonucleoside triphosphate metabolic process	0
GO:0009201	0.0583	37	7	0	0	0	ribonucleoside triphosphate biosynthetic process	0
GO:0009205	0.0464	27	1	0	0	0	purine ribonucleoside triphosphate metabolic process	0
GO:0009206	0.063	37	7	0	0	0	purine ribonucleoside triphosphate biosynthetic process	0
GO:0009228	0.0907	42	7	1	0	0	thiamine biosynthetic process	0
GO:0009235	0.2886	240	65	31	18	6	cobalamin metabolic process	0
GO:0009236	0.2948	199	61	31	18	6	cobalamin biosynthetic process	0
GO:0009240	0.3197	36	8	1	0	0	isopentenyl diphosphate biosynthetic process	0
GO:0009245	0.1412	27	6	0	0	0	lipid A biosynthetic process	0
GO:0009247	0.1075	27	6	0	0	0	glycolipid biosynthetic process	0
GO:0009250	0.112	20	2	1	0	0	glucan biosynthetic process	0
GO:0009252	0.1448	47	2	0	0	0	peptidoglycan biosynthetic process	0
GO:0009259	0.0793	842	0	0	0	0	ribonucleotide metabolic process	0
GO:0009260	0.0927	146	0	0	0	0	ribonucleotide biosynthetic process	0
GO:0009273	0.1247	46	2	0	0	0	peptidoglycan-based cell wall biogenesis	0
GO:0009274	0.1911	51	13	8	1	0	peptidoglycan-based cell wall	0
GO:0009276	0.2034	51	13	8	1	0	Gram-negative-bacterium-type cell wall	0
GO:0009288	0.1803	323	63	25	1	0	bacterial-type flagellum	0
GO:0009295	0.0144	2	0	0	0	0	nucleoid	0
GO:0009297	0.1424	69	3	0	0	0	pilus assembly	0
GO:0009306	0.0407	38	0	0	0	0	protein secretion	0
GO:0009308	0.0206	9	0	0	0	0	amine metabolic process	0
GO:0009309	0.0892	24	1	0	0	0	amine biosynthetic process	0
GO:0009311	0.0572	33	2	0	0	0	oligosaccharide metabolic process	0
GO:0009312	0.064	33	4	0	0	0	oligosaccharide biosynthetic process	0
GO:0009325	0.5799	39	10	5	1	1	nitrate reductase complex	0
GO:0009399	0.1742	116	24	1	0	0	nitrogen fixation	0
GO:0009401	0.0944	143	12	3	0	0	phosphoenolpyruvate-dependent sugar phosphotransferase system	0
GO:0009425	0.189	125	29	0	0	0	bacterial-type flagellum basal body	0
GO:0009451	0.0433	9	0	0	0	0	RNA modification	0
GO:0009521	0.2851	709	124	0	0	0	photosystem	0
GO:0009522	0.1271	158	0	0	0	0	photosystem I	0
GO:0009523	0.1864	361	9	1	0	0	photosystem II	0
GO:0009605	0.0346	28	0	0	0	0	response to external stimulus	0
GO:0009607	0.0688	86	19	14	2	0	response to biotic stimulus	0
GO:0009615	0.1181	112	28	14	2	0	response to virus	0
GO:0009653	0.0555	76	3	0	0	0	anatomical structure morphogenesis	0
GO:0009767	0.2053	49	0	0	0	0	photosynthetic electron transport chain	0
GO:0009847	0.0818	7	0	0	0	0	spore germination	0
GO:0009889	0.1282	18166	36	12	8	4	regulation of biosynthetic process	0
GO:0009987	0.512	27818	27818	5703	1356	237	cellular process	0
GO:0010181	0.0404	146	0	0	0	0	FMN binding	0
GO:0010383	0.1613	21	2	1	0	0	cell wall polysaccharide metabolic process	0
GO:0010410	0.1613	21	2	1	0	0	hemicellulose metabolic process	0
GO:0010467	0.209	27818	1111	195	85	21	gene expression	0
GO:0010468	0.1286	18680	39	12	8	4	regulation of gene expression	0
GO:0010556	0.1282	18166	36	12	8	4	regulation of macromolecule biosynthetic process	0
GO:0010608	0.0225	9	2	1	0	0	posttranscriptional regulation of gene expression	0
GO:0015031	0.0501	295	0	0	0	0	protein transport	0
GO:0015075	0.0481	126	13	1	0	0	ion transmembrane transporter activity	0
GO:0015077	0.0484	72	16	10	2	1	monovalent inorganic cation transmembrane transporter activity	0
GO:0015078	0.0584	69	15	9	2	1	hydrogen ion transmembrane transporter activity	0
GO:0015079	0.0364	6	0	0	0	0	potassium ion transmembrane transporter activity	0
GO:0015098	0.2299	19	0	0	0	0	molybdate ion transmembrane transporter activity	0
GO:0015116	0.0983	15	0	0	0	0	sulfate transmembrane transporter activity	0
GO:0015144	0.0708	58	4	1	0	0	carbohydrate transmembrane transporter activity	0
GO:0015197	0.0661	8	0	0	0	0	peptide transporter activity	0
GO:0015235	0.1983	63	5	2	1	1	cobalamin transporter activity	0
GO:0015267	0.0673	102	0	0	0	0	channel activity	0
GO:0015288	0.09	129	0	0	0	0	porin activity	0
GO:0015291	0.0597	82	17	10	2	1	secondary active transmembrane transporter activity	0
GO:0015293	0.0475	45	7	5	1	1	symporter activity	0
GO:0015294	0.0499	43	8	5	1	1	solute:cation symporter activity	0
GO:0015295	0.0954	47	10	7	3	2	solute:hydrogen symporter activity	0
GO:0015399	0.0413	110	3	2	1	1	primary active transmembrane transporter activity	0
GO:0015405	0.0413	110	3	2	1	1	P-P-bond-hydrolysis-driven transmembrane transporter activity	0
GO:0015419	0.1284	20	0	0	0	0	sulfate transmembrane-transporting ATPase activity	0
GO:0015420	0.2147	63	5	2	1	1	cobalamin-transporting ATPase activity	0
GO:0015604	0.1198	6	0	0	0	0	organic phosphonate transmembrane transporter activity	0
GO:0015662	0.107	17	4	1	0	0	ATPase activity, coupled to transmembrane movement of ions, phosphorylative mechanism	0
GO:0015672	0.0866	132	37	21	11	5	monovalent inorganic cation transport	0
GO:0015689	0.2299	19	0	0	0	0	molybdate ion transport	0
GO:0015698	0.0577	44	10	6	3	1	inorganic anion transport	0
GO:0015716	0.1731	29	0	0	0	0	organic phosphonate transport	0
GO:0015734	0.4801	18	2	1	0	0	taurine transport	0
GO:0015774	0.0623	20	5	2	0	0	polysaccharide transport	0
GO:0015935	0.5573	64	1	0	0	0	small ribosomal subunit	0
GO:0015945	0.4184	32	8	4	1	1	methanol metabolic process	0
GO:0015946	0.4184	32	8	4	1	1	methanol oxidation	0
GO:0015980	0.0477	81	0	0	0	0	energy derivation by oxidation of organic compounds	0
GO:0015985	0.0637	37	7	0	0	0	energy coupled proton transport, down electrochemical gradient	0
GO:0015986	0.0637	37	7	0	0	0	ATP synthesis coupled proton transport	0
GO:0015988	0.0965	32	9	6	1	1	energy coupled proton transmembrane transport, against electrochemical gradient	0
GO:0015991	0.1038	32	9	6	1	1	ATP hydrolysis coupled proton transport	0
GO:0015992	0.0679	50	16	8	2	1	proton transport	0
GO:0015994	0.1046	74	9	0	0	0	chlorophyll metabolic process	0
GO:0015995	0.1104	74	9	0	0	0	chlorophyll biosynthetic process	0
GO:0016020	0.2948	27818	5419	225	1	1	membrane	0
GO:0016021	0.1912	27817	440	59	4	0	integral component of membrane	0
GO:0016032	0.134	83	0	0	0	0	viral process	0
GO:0016043	0.0514	383	0	0	0	0	cellular component organization	0
GO:0016050	0.085	25	2	1	0	0	vesicle organization	0
GO:0016052	0.0308	28	1	0	0	0	carbohydrate catabolic process	0
GO:0016053	0.15	1081	115	46	21	6	organic acid biosynthetic process	0
GO:0016070	0.1454	24235	76	15	7	4	RNA metabolic process	0
GO:0016072	0.0333	3	0	0	0	0	rRNA metabolic process	0
GO:0016114	0.0739	47	0	0	0	0	terpenoid biosynthetic process	0
GO:0016151	0.217	68	22	11	7	4	nickel cation binding	0
GO:0016168	0.3208	96	11	4	1	1	chlorophyll binding	0
GO:0016301	0.0491	141	21	2	0	0	kinase activity	0
GO:0016310	0.0498	137	18	2	0	0	phosphorylation	0
GO:0016405	0.1482	3	0	0	0	0	CoA-ligase activity	0
GO:0016462	0.102	1872	77	14	0	0	pyrophosphatase activity	0
GO:0016469	0.0626	41	13	3	1	1	proton-transporting two-sector ATPase complex	0
GO:0016491	0.1728	14238	503	4	0	0	oxidoreductase activity	0
GO:0016641	0.0359	15	0	0	0	0	oxidoreductase activity, acting on the CH-NH2 group of donors, oxygen as acceptor	0
GO:0016642	0.2501	19	3	2	1	1	oxidoreductase activity, acting on the CH-NH2 group of donors, disulfide as acceptor	0
GO:0016651	0.184	369	62	29	16	6	oxidoreductase activity, acting on NAD(P)H	0
GO:0016655	0.246	291	73	38	20	7	oxidoreductase activity, acting on NAD(P)H, quinone or similar compound as acceptor	0
GO:0016661	0.2139	62	13	6	1	1	oxidoreductase activity, acting on other nitrogenous compounds as donors	0
GO:0016695	0.1618	19	4	1	0	0	oxidoreductase activity, acting on hydrogen as donor	0
GO:0016699	0.246	20	4	1	0	0	oxidoreductase activity, acting on hydrogen as donor, iron-sulfur protein as acceptor	0
GO:0016701	0.0747	51	2	0	0	0	oxidoreductase activity, acting on single donors with incorporation of molecular oxygen	0
GO:0016702	0.0265	27	0	0	0	0	oxidoreductase activity, acting on single donors with incorporation of molecular oxygen, incorporation of two atoms of oxygen	0
GO:0016725	0.1041	14	0	0	0	0	oxidoreductase activity, acting on CH or CH2 groups	0
GO:0016730	0.0962	19	2	0	0	0	oxidoreductase activity, acting on iron-sulfur proteins as donors	0
GO:0016740	0.2333	27817	1715	12	0	0	transferase activity	0
GO:0016741	0.1017	1284	135	34	1	0	transferase activity, transferring one-carbon groups	0
GO:0016757	0.0367	18	0	0	0	0	transferase activity, transferring glycosyl groups	0
GO:0016772	0.0815	1058	36	18	9	0	transferase activity, transferring phosphorus-containing groups	0
GO:0016773	0.0326	90	0	0	0	0	phosphotransferase activity, alcohol group as acceptor	0
GO:0016775	0.0239	27	0	0	0	0	phosphotransferase activity, nitrogenous group as acceptor	0
GO:0016782	0.0128	11	3	2	1	1	transferase activity, transferring sulfur-containing groups	0
GO:0016787	0.2435	27811	1376	0	0	0	hydrolase activity	0
GO:0016788	0.0742	504	27	11	6	3	hydrolase activity, acting on ester bonds	0
GO:0016798	0.0424	110	0	0	0	0	hydrolase activity, acting on glycosyl bonds	0
GO:0016814	0.0207	2	0	0	0	0	hydrolase activity, acting on carbon-nitrogen (but not peptide) bonds, in cyclic amidines	0
GO:0016817	0.1014	1929	78	17	0	0	hydrolase activity, acting on acid anhydrides	0
GO:0016818	0.1021	1843	78	17	0	0	hydrolase activity, acting on acid anhydrides, in phosphorus-containing anhydrides	0
GO:0016820	0.0435	91	3	2	1	1	hydrolase activity, acting on acid anhydrides, catalyzing transmembrane movement of substances	0
GO:0016829	0.0747	832	21	0	0	0	lyase activity	0
GO:0016835	0.0524	98	8	1	0	0	carbon-oxygen lyase activity	0
GO:0016836	0.0769	107	11	4	0	0	hydro-lyase activity	0
GO:0016840	0.0316	10	2	1	0	0	carbon-nitrogen lyase activity	0
GO:0016841	0.0881	23	3	2	1	1	ammonia-lyase activity	0
GO:0016849	0.0387	39	4	1	0	0	phosphorus-oxygen lyase activity	0
GO:0016853	0.0369	47	2	1	0	0	isomerase activity	0
GO:0016854	0.0378	19	2	0	0	0	racemase and epimerase activity	0
GO:0016857	0.0382	16	2	0	0	0	racemase and epimerase activity, acting on carbohydrates and derivatives	0
GO:0016874	0.1146	517	77	24	6	2	ligase activity	0
GO:0016875	0.174	166	43	22	3	2	ligase activity, forming carbon-oxygen bonds	0
GO:0016876	0.174	166	43	22	3	2	ligase activity, forming aminoacyl-tRNA and related compounds	0
GO:0016887	0.0574	160	9	3	1	1	ATPase activity	0
GO:0016903	0.0291	3	0	0	0	0	oxidoreductase activity, acting on the aldehyde or oxo group of donors	0
GO:0017004	0.0118	6	0	0	0	0	cytochrome complex assembly	0
GO:0017076	0.1624	9049	455	67	4	3	purine nucleotide binding	0
GO:0017111	0.0995	1671	80	14	0	0	nucleoside-triphosphatase activity	0
GO:0017171	0.0255	22	6	4	1	1	serine hydrolase activity	0
GO:0018130	0.1785	27818	549	91	36	6	heterocycle biosynthetic process	0
GO:0018298	0.3916	290	75	21	3	1	protein-chromophore linkage	0
GO:0018492	0.2519	17	0	0	0	0	carbon-monoxide dehydrogenase (acceptor) activity	0
GO:0018662	0.1267	8	2	2	1	1	phenol 2-monooxygenase activity	0
GO:0018822	0.0692	22	6	4	2	2	nitrile hydratase activity	0
GO:0019012	0.1172	178	45	23	15	11	virion	0
GO:0019015	0.3784	175	66	29	15	12	viral genome	0
GO:0019038	0.3784	175	66	29	15	12	provirus	0
GO:0019058	0.0944	31	6	1	0	0	viral life cycle	0
GO:0019068	0.1293	31	6	1	0	0	virion assembly	0
GO:0019069	0.1929	29	6	1	0	0	viral capsid assembly	0
GO:0019219	0.1274	18730	39	12	8	4	regulation of nucleobase-containing compound metabolic process	0
GO:0019222	0.132	20523	41	12	8	4	regulation of metabolic process	0
GO:0019288	0.3197	36	8	1	0	0	isopentenyl diphosphate biosynthetic process, methylerythritol 4-phosphate pathway	0
GO:0019318	0.0246	6	0	0	0	0	hexose metabolic process	0
GO:0019438	0.1732	27818	576	64	9	5	aromatic compound biosynthetic process	0
GO:0019464	0.1898	19	3	2	1	1	glycine decarboxylation via glycine cleavage system	0
GO:0019509	0.0966	21	7	5	2	2	L-methionine salvage from methylthioadenosine	0
GO:0019538	0.1781	5375	522	174	81	18	protein metabolic process	0
GO:0019545	0.2025	2	0	0	0	0	arginine catabolic process to succinate	0
GO:0019627	0.3736	46	11	1	0	0	urea metabolic process	0
GO:0019634	0.4965	81	19	11	0	0	organic phosphonate metabolic process	0
GO:0019637	0.1372	3097	113	25	15	8	organophosphate metabolic process	0
GO:0019682	0.3197	36	8	1	0	0	glyceraldehyde-3-phosphate metabolic process	0
GO:0019684	0.1465	245	4	3	2	1	photosynthesis, light reaction	0
GO:0019693	0.0893	848	0	0	0	0	ribose phosphate metabolic process	0
GO:0019700	0.3255	16	0	0	0	0	organic phosphonate catabolic process	0
GO:0019720	0.2405	43	14	7	0	0	Mo-molybdopterin cofactor metabolic process	0
GO:0019752	0.1877	2634	277	98	2	2	carboxylic acid metabolic process	0
GO:0019829	0.0738	37	7	0	0	0	cation-transporting ATPase activity	0
GO:0019843	0.3511	394	90	46	29	6	rRNA binding	0
GO:0020037	0.0261	5	0	0	0	0	heme binding	0
GO:0022402	0.0398	38	6	1	0	0	cell cycle process	0
GO:0022603	0.0836	48	7	0	0	0	regulation of anatomical structure morphogenesis	0
GO:0022604	0.0854	48	7	0	0	0	regulation of cell morphogenesis	0
GO:0022607	0.0301	18	0	0	0	0	cellular component assembly	0
GO:0022613	0.0426	7	0	0	0	0	ribonucleoprotein complex biogenesis	0
GO:0022803	0.0673	102	0	0	0	0	passive transmembrane transporter activity	0
GO:0022804	0.0519	166	16	3	1	1	active transmembrane transporter activity	0
GO:0022829	0.09	129	0	0	0	0	wide pore channel activity	0
GO:0022857	0.0727	870	16	10	2	2	transmembrane transporter activity	0
GO:0022890	0.0443	74	16	8	2	1	inorganic cation transmembrane transporter activity	0
GO:0022891	0.0558	346	0	0	0	0	substrate-specific transmembrane transporter activity	0
GO:0022892	0.0647	278	0	0	0	0	substrate-specific transporter activity	0
GO:0022900	0.0729	250	13	5	1	0	electron transport chain	0
GO:0022904	0.0235	27	0	0	0	0	respiratory electron transport chain	0
GO:0023014	0.0299	24	0	0	0	0	signal transduction by phosphorylation	0
GO:0023052	0.0584	504	31	9	5	4	signaling	0
GO:0030001	0.0687	106	31	12	9	5	metal ion transport	0
GO:0030030	0.0535	108	0	0	0	0	cell projection organization	0
GO:0030031	0.0306	45	0	0	0	0	cell projection assembly	0
GO:0030076	0.345	442	150	27	8	1	light-harvesting complex	0
GO:0030077	0.1509	63	7	0	0	0	plasma membrane light-harvesting complex	0
GO:0030203	0.0394	51	2	0	0	0	glycosaminoglycan metabolic process	0
GO:0030246	0.0231	19	4	3	2	2	carbohydrate binding	0
GO:0030260	0.0404	13	0	0	0	0	entry into host cell	0
GO:0030261	0.0378	13	0	0	0	0	chromosome condensation	0
GO:0030312	0.0401	62	17	8	1	0	external encapsulating structure	0
GO:0030313	0.0381	68	14	8	1	0	cell envelope	0
GO:0030493	0.3387	42	0	0	0	0	bacteriochlorophyll metabolic process	0
GO:0030494	0.3387	42	0	0	0	0	bacteriochlorophyll biosynthetic process	0
GO:0030529	0.2718	1208	222	106	52	16	ribonucleoprotein complex	0
GO:0030554	0.1472	6148	220	13	2	0	adenyl nucleotide binding	0
GO:0030694	0.4068	34	0	0	0	0	bacterial-type flagellum basal body, rod	0
GO:0031224	0.1915	27817	453	59	4	0	intrinsic component of membrane	0
GO:0031323	0.1275	19271	27	12	8	4	regulation of cellular metabolic process	0
GO:0031326	0.1282	18166	36	12	8	4	regulation of cellular biosynthetic process	0
GO:0031410	0.1265	113	4	0	0	0	cytoplasmic vesicle	0
GO:0031411	0.2709	53	0	0	0	0	gas vesicle	0
GO:0031412	0.0947	24	2	1	0	0	gas vesicle organization	0
GO:0031975	0.0379	69	14	8	1	0	envelope	0
GO:0031982	0.0977	125	4	0	0	0	vesicle	0
GO:0032259	0.1032	1107	145	26	2	1	methylation	0
GO:0032268	0.021	9	2	1	0	0	regulation of cellular protein metabolic process	0
GO:0032324	0.2405	43	14	7	0	0	molybdopterin cofactor biosynthetic process	0
GO:0032392	0.1573	16	0	0	0	0	DNA geometric change	0
GO:0032502	0.0544	170	0	0	0	0	developmental process	0
GO:0032506	0.0578	46	6	1	0	0	cytokinetic process	0
GO:0032508	0.1573	16	0	0	0	0	DNA duplex unwinding	0
GO:0032549	0.162	7363	410	66	4	3	ribonucleoside binding	0
GO:0032550	0.1613	7363	434	65	4	3	purine ribonucleoside binding	0
GO:0032553	0.1623	10225	445	63	4	3	ribonucleotide binding	0
GO:0032555	0.1596	8538	434	65	4	3	purine ribonucleotide binding	0
GO:0032559	0.1454	5761	212	12	2	0	adenyl ribonucleotide binding	0
GO:0032774	0.1301	19420	23	12	7	4	RNA biosynthetic process	0
GO:0032787	0.0528	102	17	4	2	2	monocarboxylic acid metabolic process	0
GO:0032940	0.0407	38	0	0	0	0	secretion by cell	0
GO:0032989	0.0846	77	3	0	0	0	cellular component morphogenesis	0
GO:0032991	0.2174	3827	747	311	73	15	macromolecular complex	0
GO:0033013	0.1832	364	95	40	19	6	tetrapyrrole metabolic process	0
GO:0033014	0.1946	318	82	40	19	6	tetrapyrrole biosynthetic process	0
GO:0033036	0.0505	271	0	0	0	0	macromolecule localization	0
GO:0033037	0.0623	20	5	2	0	0	polysaccharide localization	0
GO:0033178	0.0909	28	1	0	0	0	proton-transporting two-sector ATPase complex, catalytic domain	0
GO:0033554	0.0425	42	0	0	0	0	cellular response to stress	0
GO:0033692	0.0702	97	15	9	2	1	cellular polysaccharide biosynthetic process	0
GO:0033988	0.0519	4	0	0	0	0	bile-acid 7alpha-dehydratase activity	0
GO:0034220	0.0634	86	22	10	0	0	ion transmembrane transport	0
GO:0034308	0.4184	32	8	4	1	1	primary alcohol metabolic process	0
GO:0034470	0.066	114	0	0	0	0	ncRNA processing	0
GO:0034622	0.009	1	0	0	0	0	cellular macromolecular complex assembly	0
GO:0034637	0.0654	93	14	9	2	1	cellular carbohydrate biosynthetic process	0
GO:0034641	0.2954	27818	4150	560	45	8	cellular nitrogen compound metabolic process	0
GO:0034645	0.2064	27818	979	190	67	25	cellular macromolecule biosynthetic process	0
GO:0034654	0.1418	23760	24	6	0	0	nucleobase-containing compound biosynthetic process	0
GO:0034660	0.1165	588	51	13	6	3	ncRNA metabolic process	0
GO:0035383	0.1366	48	0	0	0	0	thioester metabolic process	0
GO:0035435	0.4122	19	4	1	0	0	phosphate ion transmembrane transport	0
GO:0035556	0.0525	239	15	6	1	0	intracellular signal transduction	0
GO:0035639	0.162	7421	434	65	4	3	purine ribonucleoside triphosphate binding	0
GO:0036094	0.1975	27818	989	75	5	1	small molecule binding	0
GO:0036211	0.0703	384	117	40	10	0	protein modification process	0
GO:0038023	0.0397	30	0	0	0	0	signaling receptor activity	0
GO:0040011	0.1249	329	63	3	0	0	locomotion	0
GO:0042126	0.2286	23	5	2	0	0	nitrate metabolic process	0
GO:0042168	0.0662	20	6	2	1	1	heme metabolic process	0
GO:0042221	0.0213	8	0	0	0	0	response to chemical	0
GO:0042254	0.0426	7	0	0	0	0	ribosome biogenesis	0
GO:0042278	0.0533	22	0	0	0	0	purine nucleoside metabolic process	0
GO:0042330	0.0458	29	0	0	0	0	taxis	0
GO:0042364	0.2153	377	67	38	22	15	water-soluble vitamin biosynthetic process	0
GO:0042401	0.0892	24	1	0	0	0	cellular biogenic amine biosynthetic process	0
GO:0042430	0.0735	19	0	0	0	0	indole-containing compound metabolic process	0
GO:0042435	0.1654	24	1	0	0	0	indole-containing compound biosynthetic process	0
GO:0042440	0.0913	65	8	0	0	0	pigment metabolic process	0
GO:0042451	0.0397	27	0	0	0	0	purine nucleoside biosynthetic process	0
GO:0042455	0.0484	6	0	0	0	0	ribonucleoside biosynthetic process	0
GO:0042546	0.1157	46	2	0	0	0	cell wall biogenesis	0
GO:0042623	0.0511	146	13	2	1	1	ATPase activity, coupled	0
GO:0042625	0.0603	37	3	0	0	0	ATPase activity, coupled to transmembrane movement of ions	0
GO:0042626	0.0464	91	3	2	1	1	ATPase activity, coupled to transmembrane movement of substances	0
GO:0042651	0.3599	1094	357	68	16	1	thylakoid membrane	0
GO:0042716	0.1509	63	7	0	0	0	plasma membrane-derived chromatophore	0
GO:0042723	0.078	37	7	1	0	0	thiamine-containing compound metabolic process	0
GO:0042724	0.0907	42	7	1	0	0	thiamine-containing compound biosynthetic process	0
GO:0042777	0.1213	36	7	0	0	0	plasma membrane ATP synthesis coupled proton transport	0
GO:0042995	0.0951	176	40	15	0	0	cell projection	0
GO:0043038	0.2775	169	39	18	3	2	amino acid activation	0
GO:0043039	0.2775	169	39	18	3	2	tRNA aminoacylation	0
GO:0043094	0.029	20	6	4	2	2	cellular metabolic compound salvage	0
GO:0043102	0.0966	21	7	5	2	2	amino acid salvage	0
GO:0043167	0.2811	27817	3453	358	43	0	ion binding	0
GO:0043168	0.1975	13634	711	116	3	2	anion binding	0
GO:0043169	0.148	18706	26	6	3	2	cation binding	0
GO:0043170	0.3149	27818	6254	634	173	10	macromolecule metabolic process	0
GO:0043226	0.2052	1956	328	130	59	14	organelle	0
GO:0043228	0.2176	1848	307	130	59	14	non-membrane-bounded organelle	0
GO:0043229	0.2076	1949	328	130	59	14	intracellular organelle	0
GO:0043232	0.2176	1848	307	130	59	14	intracellular non-membrane-bounded organelle	0
GO:0043234	0.1273	1243	331	118	11	1	protein complex	0
GO:0043412	0.0738	650	90	38	10	0	macromolecule modification	0
GO:0043419	0.6161	31	2	0	0	0	urea catabolic process	0
GO:0043436	0.1881	2609	277	98	2	2	oxoacid metabolic process	0
GO:0043492	0.0464	91	3	2	1	1	ATPase activity, coupled to movement of substances	0
GO:0043545	0.2405	43	14	7	0	0	molybdopterin cofactor metabolic process	0
GO:0043570	0.0327	38	13	7	5	2	maintenance of DNA repeat elements	0
GO:0043571	0.0327	38	13	7	5	2	maintenance of CRISPR repeat elements	0
GO:0043603	0.0562	106	0	0	0	0	cellular amide metabolic process	0
GO:0043604	0.0212	12	0	0	0	0	amide biosynthetic process	0
GO:0043605	0.2146	74	0	0	0	0	cellular amide catabolic process	0
GO:0043623	0.0086	5	0	0	0	0	cellular protein complex assembly	0
GO:0043711	0.1816	77	0	0	0	0	pilus organization	0
GO:0044036	0.0365	45	2	0	0	0	cell wall macromolecule metabolic process	0
GO:0044038	0.1249	47	2	0	0	0	cell wall macromolecule biosynthetic process	0
GO:0044042	0.0879	24	0	0	0	0	glucan metabolic process	0
GO:0044085	0.0653	303	12	0	0	0	cellular component biogenesis	0
GO:0044106	0.0335	11	0	0	0	0	cellular amine metabolic process	0
GO:0044237	0.4599	27818	27648	3609	1091	90	cellular metabolic process	0
GO:0044238	0.429	27818	25706	2302	654	38	primary metabolic process	0
GO:0044248	0.0565	30	0	0	0	0	cellular catabolic process	0
GO:0044249	0.3112	27818	3762	851	289	62	cellular biosynthetic process	0
GO:0044255	0.0774	395	45	4	0	0	cellular lipid metabolic process	0
GO:0044260	0.2871	27818	3849	588	156	11	cellular macromolecule metabolic process	0
GO:0044262	0.0579	135	14	10	2	1	cellular carbohydrate metabolic process	0
GO:0044264	0.062	99	14	9	2	1	cellular polysaccharide metabolic process	0
GO:0044267	0.2115	3432	466	179	80	18	cellular protein metabolic process	0
GO:0044270	0.0503	24	0	0	0	0	cellular nitrogen compound catabolic process	0
GO:0044271	0.1694	27818	347	62	24	7	cellular nitrogen compound biosynthetic process	0
GO:0044272	0.0553	57	6	0	0	0	sulfur compound biosynthetic process	0
GO:0044281	0.2664	12570	1215	357	92	8	small molecule metabolic process	0
GO:0044283	0.2078	1792	254	88	52	25	small molecule biosynthetic process	0
GO:0044391	0.2299	146	29	3	1	1	ribosomal subunit	0
GO:0044403	0.0336	77	0	0	0	0	symbiosis, encompassing mutualism through parasitism	0
GO:0044409	0.0404	13	0	0	0	0	entry into host	0
GO:0044419	0.0336	77	0	0	0	0	interspecies interaction between organisms	0
GO:0044422	0.1528	651	111	2	0	0	organelle part	0
GO:0044423	0.1192	191	44	23	15	11	virion part	0
GO:0044424	0.2923	19496	1929	634	179	27	intracellular part	0
GO:0044425	0.2114	27818	1207	241	7	1	membrane part	0
GO:0044427	0.1872	182	30	19	12	11	chromosomal part	0
GO:0044433	0.1465	61	7	0	0	0	cytoplasmic vesicle part	0
GO:0044436	0.41	1254	436	190	2	1	thylakoid part	0
GO:0044444	0.2267	1495	236	110	53	17	cytoplasmic part	0
GO:0044446	0.1398	417	45	3	1	1	intracellular organelle part	0
GO:0044461	0.2002	165	41	15	0	0	bacterial-type flagellum part	0
GO:0044463	0.2002	165	41	15	0	0	cell projection part	0
GO:0044464	0.306	27818	4827	847	217	41	cell part	0
GO:0044699	0.4307	27818	27147	2953	419	40	single-organism process	0
GO:0044700	0.0584	504	31	9	5	4	single organism signaling	0
GO:0044710	0.3649	27818	6508	1477	195	14	single-organism metabolic process	0
GO:0044711	0.2295	6916	847	240	109	8	single-organism biosynthetic process	0
GO:0044712	0.0646	374	0	0	0	0	single-organism catabolic process	0
GO:0044723	0.0621	247	25	14	5	1	single-organism carbohydrate metabolic process	0
GO:0044763	0.3381	27818	5619	1111	249	25	single-organism cellular process	0
GO:0044764	0.0214	4	0	0	0	0	multi-organism cellular process	0
GO:0044765	0.1066	5318	54	20	11	8	single-organism transport	0
GO:0044767	0.0501	84	3	0	0	0	single-organism developmental process	0
GO:0044769	0.0948	36	7	0	0	0	ATPase activity, coupled to transmembrane movement of ions, rotational mechanism	0
GO:0044781	0.0192	5	0	0	0	0	bacterial-type flagellum organization	0
GO:0045156	0.1356	49	7	0	0	0	electron transporter, transferring electrons within the cyclic electron transport pathway of photosynthesis activity	0
GO:0045184	0.0512	258	0	0	0	0	establishment of protein localization	0
GO:0045259	0.0118	8	0	0	0	0	proton-transporting ATP synthase complex	0
GO:0045261	0.0177	7	0	0	0	0	proton-transporting ATP synthase complex, catalytic core F(1)	0
GO:0045333	0.0475	102	0	0	0	0	cellular respiration	0
GO:0045491	0.1613	21	2	1	0	0	xylan metabolic process	0
GO:0045493	0.1613	21	2	1	0	0	xylan catabolic process	0
GO:0046128	0.0537	22	0	0	0	0	purine ribonucleoside metabolic process	0
GO:0046129	0.0397	27	0	0	0	0	purine ribonucleoside biosynthetic process	0
GO:0046148	0.1054	68	10	0	0	0	pigment biosynthetic process	0
GO:0046219	0.1654	24	1	0	0	0	indolalkylamine biosynthetic process	0
GO:0046390	0.0701	163	0	0	0	0	ribose phosphate biosynthetic process	0
GO:0046394	0.1509	1081	115	46	21	6	carboxylic acid biosynthetic process	0
GO:0046434	0.0496	39	9	1	0	0	organophosphate catabolic process	0
GO:0046467	0.1075	27	6	0	0	0	membrane lipid biosynthetic process	0
GO:0046483	0.2976	27818	4045	622	52	9	heterocycle metabolic process	0
GO:0046490	0.3197	36	8	1	0	0	isopentenyl diphosphate metabolic process	0
GO:0046493	0.1412	27	6	0	0	0	lipid A metabolic process	0
GO:0046501	0.1304	17	0	0	0	0	protoporphyrinogen IX metabolic process	0
GO:0046559	0.4131	17	1	1	0	0	alpha-glucuronidase activity	0
GO:0046821	0.0181	2	0	0	0	0	extrachromosomal DNA	0
GO:0046872	0.1454	18140	35	6	2	2	metal ion binding	0
GO:0046903	0.046	245	2	1	0	0	secretion	0
GO:0046906	0.0517	259	33	4	1	1	tetrapyrrole binding	0
GO:0046914	0.0719	324	26	13	5	3	transition metal ion binding	0
GO:0046933	0.1011	36	7	0	0	0	proton-transporting ATP synthase activity, rotational mechanism	0
GO:0046992	0.3267	47	12	4	0	0	oxidoreductase activity, acting on X-H and Y-H to form an X-Y bond	0
GO:0048037	0.0809	862	21	6	1	1	cofactor binding	0
GO:0048038	0.1207	184	41	21	8	1	quinone binding	0
GO:0048856	0.054	77	3	0	0	0	anatomical structure development	0
GO:0048869	0.0534	76	3	0	0	0	cellular developmental process	0
GO:0050136	0.2124	108	31	19	11	2	NADH dehydrogenase (quinone) activity	0
GO:0050485	0.3267	47	12	4	0	0	oxidoreductase activity, acting on X-H and Y-H to form an X-Y bond, with a disulfide as acceptor	0
GO:0050789	0.157	27818	122	26	10	1	regulation of biological process	0
GO:0050793	0.0796	48	7	0	0	0	regulation of developmental process	0
GO:0050794	0.1517	27163	118	23	10	1	regulation of cellular process	0
GO:0050896	0.0876	1778	27	9	5	4	response to stimulus	0
GO:0051119	0.0901	51	10	5	3	2	sugar transmembrane transporter activity	0
GO:0051128	0.0495	46	4	0	0	0	regulation of cellular component organization	0
GO:0051171	0.1274	18730	39	12	8	4	regulation of nitrogen compound metabolic process	0
GO:0051179	0.1828	27818	563	88	34	23	localization	0
GO:0051183	0.1352	60	5	2	1	1	vitamin transporter activity	0
GO:0051186	0.0856	939	0	0	0	0	cofactor metabolic process	0
GO:0051188	0.0904	573	0	0	0	0	cofactor biosynthetic process	0
GO:0051189	0.2115	44	14	7	0	0	prosthetic group metabolic process	0
GO:0051213	0.0468	101	0	0	0	0	dioxygenase activity	0
GO:0051234	0.1617	27818	224	52	14	11	establishment of localization	0
GO:0051246	0.021	9	2	1	0	0	regulation of protein metabolic process	0
GO:0051252	0.1293	17611	38	12	8	4	regulation of RNA metabolic process	0
GO:0051276	0.0489	63	12	7	5	4	chromosome organization	0
GO:0051301	0.0357	88	0	0	0	0	cell division	0
GO:0051302	0.182	23	1	0	0	0	regulation of cell division	0
GO:0051536	0.0699	424	24	7	4	4	iron-sulfur cluster binding	0
GO:0051539	0.0422	29	3	1	1	1	4 iron, 4 sulfur cluster binding	0
GO:0051540	0.0696	424	24	7	4	4	metal cluster binding	0
GO:0051607	0.1383	113	28	14	2	0	defense response to virus	0
GO:0051641	0.0435	147	0	0	0	0	cellular localization	0
GO:0051649	0.0434	266	0	0	0	0	establishment of localization in cell	0
GO:0051674	0.1472	307	57	7	0	0	localization of cell	0
GO:0051701	0.0174	6	0	0	0	0	interaction with host	0
GO:0051704	0.0788	1131	48	4	0	0	multi-organism process	0
GO:0051707	0.0714	85	19	14	2	0	response to other organism	0
GO:0051716	0.0645	907	38	8	5	4	cellular response to stimulus	0
GO:0051726	0.3352	16	1	0	0	0	regulation of cell cycle	0
GO:0051806	0.0404	13	0	0	0	0	entry into cell of other organism involved in symbiotic interaction	0
GO:0051828	0.0404	13	0	0	0	0	entry into other organism involved in symbiotic interaction	0
GO:0052126	0.0404	13	0	0	0	0	movement in host environment	0
GO:0052192	0.0404	13	0	0	0	0	movement in environment of other organism involved in symbiotic interaction	0
GO:0052636	0.5879	7	0	0	0	0	arabinosyltransferase activity	0
GO:0052689	0.0126	8	1	0	0	0	carboxylic ester hydrolase activity	0
GO:0052803	0.1818	47	12	7	1	0	imidazole-containing compound metabolic process	0
GO:0055085	0.0534	113	14	7	1	0	transmembrane transport	0
GO:0055086	0.1033	2111	12	0	0	0	nucleobase-containing small molecule metabolic process	0
GO:0055114	0.1889	12689	848	131	0	0	oxidation-reduction process	0
GO:0060089	0.0549	407	16	3	0	0	molecular transducer activity	0
GO:0060255	0.13	19301	35	12	8	4	regulation of macromolecule metabolic process	0
GO:0061505	0.1382	11	0	0	0	0	DNA topoisomerase II activity	0
GO:0065007	0.1581	27818	124	26	10	1	biological regulation	0
GO:0065008	0.0367	59	2	0	0	0	regulation of biological quality	0
GO:0070011	0.0307	20	0	0	0	0	peptidase activity, acting on L-amino acid peptides	0
GO:0070589	0.1249	47	2	0	0	0	cellular component macromolecule biosynthetic process	0
GO:0071103	0.0254	12	0	0	0	0	DNA conformation change	0
GO:0071265	0.0419	19	7	4	2	2	L-methionine biosynthetic process	0
GO:0071267	0.0966	21	7	5	2	2	L-methionine salvage	0
GO:0071554	0.0345	54	2	0	0	0	cell wall organization or biogenesis	0
GO:0071702	0.0619	562	15	0	0	0	organic substance transport	0
GO:0071704	0.4688	27818	27818	3733	1027	86	organic substance metabolic process	0
GO:0071766	0.5879	7	0	0	0	0	Actinobacterium-type cell wall biogenesis	0
GO:0071840	0.0724	831	1	0	0	0	cellular component organization or biogenesis	0
GO:0071941	0.1415	179	6	0	0	0	nitrogen cycle metabolic process	0
GO:0071944	0.1194	5831	198	65	36	14	cell periphery	0
GO:0072348	0.051	2	0	0	0	0	sulfur compound transport	0
GO:0072521	0.0713	746	0	0	0	0	purine-containing compound metabolic process	0
GO:0072522	0.0677	102	0	0	0	0	purine-containing compound biosynthetic process	0
GO:0072527	0.0192	8	1	0	0	0	pyrimidine-containing compound metabolic process	0
GO:0072528	0.0176	8	1	0	0	0	pyrimidine-containing compound biosynthetic process	0
GO:0080090	0.1289	19078	28	12	8	4	regulation of primary metabolic process	0
GO:0080109	0.1514	24	6	3	2	2	indole-3-acetonitrile nitrile hydratase activity	0
GO:0090304	0.2208	27818	1365	91	5	2	nucleic acid metabolic process	0
GO:0090305	0.0251	7	0	0	0	0	nucleic acid phosphodiester bond hydrolysis	0
GO:0090407	0.1038	1284	13	4	1	0	organophosphate biosynthetic process	0
GO:0090482	0.184	59	5	2	1	1	vitamin transmembrane transporter activity	0
GO:0090529	0.0578	46	6	1	0	0	cell septum assembly	0
GO:0097159	0.3575	27818	17849	635	127	13	organic cyclic compound binding	0
GO:0097367	0.1621	10209	393	66	4	3	carbohydrate derivative binding	0
GO:0098542	0.0912	94	23	14	2	0	defense response to other organism	0
GO:1901135	0.1069	2513	16	3	1	1	carbohydrate derivative metabolic process	0
GO:1901137	0.0921	789	11	5	0	0	carbohydrate derivative biosynthetic process	0
GO:1901265	0.188	23911	775	87	8	2	nucleoside phosphate binding	0
GO:1901269	0.1412	27	6	0	0	0	lipooligosaccharide metabolic process	0
GO:1901271	0.1412	27	6	0	0	0	lipooligosaccharide biosynthetic process	0
GO:1901293	0.0689	528	0	0	0	0	nucleoside phosphate biosynthetic process	0
GO:1901360	0.3032	27818	4200	757	32	8	organic cyclic compound metabolic process	0
GO:1901362	0.1853	27818	778	109	22	9	organic cyclic compound biosynthetic process	0
GO:1901363	0.3567	27818	17693	631	127	13	heterocyclic compound binding	0
GO:1901476	0.0708	58	4	1	0	0	carbohydrate transporter activity	0
GO:1901564	0.2669	10814	1199	339	109	14	organonitrogen compound metabolic process	0
GO:1901565	0.0476	30	0	0	0	0	organonitrogen compound catabolic process	0
GO:1901566	0.2641	4075	583	207	93	13	organonitrogen compound biosynthetic process	0
GO:1901575	0.0795	669	22	0	0	0	organic substance catabolic process	0
GO:1901576	0.3115	27818	3916	873	293	56	organic substance biosynthetic process	0
GO:1901605	0.1444	943	93	25	14	6	alpha-amino acid metabolic process	0
GO:1901607	0.1697	541	93	33	12	8	alpha-amino acid biosynthetic process	0
GO:1901657	0.0675	608	0	0	0	0	glycosyl compound metabolic process	0
GO:1901677	0.3082	31	12	6	2	1	phosphate transmembrane transporter activity	0
GO:1902494	0.0271	24	4	1	0	0	catalytic complex	0
GO:1902589	0.0531	63	12	7	5	4	single-organism organelle organization	0
GO:1990204	0.0834	32	6	1	0	0	oxidoreductase complex	0
GO:2000112	0.1283	18166	36	12	8	4	regulation of cellular macromolecule biosynthetic process	0
GO:2001057	0.2286	23	5	2	0	0	reactive nitrogen species metabolic process	0
GO:2001141	0.1291	17572	38	12	8	4	regulation of RNA biosynthetic process	0

## Sheet: MPP-H__all_predictions
		# of gene families for which a GO term is predicted at Precision≥X%
GO term	AUPRC	0.1	0.3	0.5	0.7	0.9	Description	Highlighted in paper
GO:0009405	0.1252	573	179	52	17	6	pathogenesis	1
GO:0015948	0.4856	207	67	34	5	0	methanogenesis	1
GO:0016051	0.0692	214	28	7	0	0	carbohydrate biosynthetic process	1		total COG/NOG gene families analyzed in MPP-H
GO:0032196	0.064	151	18	6	2	2	transposition	1		9556
GO:0034357	0.1416	181	53	32	20	13	photosynthetic membrane	1
GO:0048870	0.1759	265	63	11	0	0	cell motility	1
GO:0000049	0.0414	24	0	0	0	0	tRNA binding	0
GO:0000105	0.4774	68	24	14	9	2	histidine biosynthetic process	0
GO:0000107	0.7796	16	0	0	0	0	imidazoleglycerol-phosphate synthase activity	0
GO:0000154	0.0805	5	0	0	0	0	rRNA modification	0
GO:0000160	0.0239	76	0	0	0	0	phosphorelay signal transduction system	0
GO:0000162	0.3052	27	5	3	0	0	tryptophan biosynthetic process	0
GO:0000166	0.225	15792	892	275	88	13	nucleotide binding	0
GO:0000270	0.0638	86	0	0	0	0	peptidoglycan metabolic process	0
GO:0000271	0.0309	46	4	1	0	0	polysaccharide biosynthetic process	0
GO:0000413	0.017	21	2	0	0	0	protein peptidyl-prolyl isomerization	0
GO:0000502	0.1997	27	3	2	1	1	proteasome complex	0
GO:0000746	0.1815	111	34	10	0	0	conjugation	0
GO:0000902	0.0854	94	10	0	0	0	cell morphogenesis	0
GO:0000910	0.0109	8	0	0	0	0	cytokinesis	0
GO:0000917	0.0132	9	1	0	0	0	barrier septum assembly	0
GO:0001071	0.0406	186	0	0	0	0	nucleic acid binding transcription factor activity	0
GO:0001510	0.0623	19	2	1	0	0	RNA methylation	0
GO:0001514	0.5235	18	3	1	1	1	selenocysteine incorporation	0
GO:0001539	0.1783	265	63	11	0	0	ciliary or bacterial-type flagellar motility	0
GO:0001682	0.0989	5	0	0	0	0	tRNA 5'-leader removal	0
GO:0001882	0.2198	10722	738	230	82	10	nucleoside binding	0
GO:0001883	0.2194	10356	716	225	82	10	purine nucleoside binding	0
GO:0002161	0.2283	17	4	1	0	0	aminoacyl-tRNA editing activity	0
GO:0002252	0.114	58	33	22	13	9	immune effector process	0
GO:0002376	0.1014	58	33	22	13	9	immune system process	0
GO:0003333	0.0198	8	0	0	0	0	amino acid transmembrane transport	0
GO:0003676	0.2597	15792	3770	269	44	14	nucleic acid binding	0
GO:0003677	0.1771	15786	373	0	0	0	DNA binding	0
GO:0003700	0.0406	159	0	0	0	0	sequence-specific DNA binding transcription factor activity	0
GO:0003723	0.2036	1509	227	82	45	13	RNA binding	0
GO:0003735	0.352	1092	216	107	60	35	structural constituent of ribosome	0
GO:0003755	0.017	21	2	0	0	0	peptidyl-prolyl cis-trans isomerase activity	0
GO:0003774	0.1767	151	30	12	0	0	motor activity	0
GO:0003824	0.6443	15792	15792	15792	3450	100	catalytic activity	0
GO:0003896	0.0491	7	0	0	0	0	DNA primase activity	0
GO:0003899	0.0497	16	0	0	0	0	DNA-directed RNA polymerase activity	0
GO:0003916	0.0275	17	3	2	1	1	DNA topoisomerase activity	0
GO:0003918	0.1119	19	2	1	0	0	DNA topoisomerase type II (ATP-hydrolyzing) activity	0
GO:0003924	0.0521	14	0	0	0	0	GTPase activity	0
GO:0003954	0.1932	106	23	13	10	5	NADH dehydrogenase activity	0
GO:0004386	0.033	14	0	0	0	0	helicase activity	0
GO:0004518	0.1263	1953	170	86	44	23	nuclease activity	0
GO:0004519	0.1168	798	140	61	25	3	endonuclease activity	0
GO:0004526	0.0166	2	0	0	0	0	ribonuclease P activity	0
GO:0004527	0.1965	535	134	86	44	24	exonuclease activity	0
GO:0004540	0.0151	10	0	0	0	0	ribonuclease activity	0
GO:0004553	0.0886	567	28	0	0	0	hydrolase activity, hydrolyzing O-glycosyl compounds	0
GO:0004774	0.3961	18	4	0	0	0	succinate-CoA ligase activity	0
GO:0004775	0.3961	18	4	0	0	0	succinate-CoA ligase (ADP-forming) activity	0
GO:0004803	0.0536	139	12	8	2	2	transposase activity	0
GO:0004812	0.1929	220	46	11	1	1	aminoacyl-tRNA ligase activity	0
GO:0004820	0.2793	21	8	4	1	1	glycine-tRNA ligase activity	0
GO:0004857	0.0139	24	0	0	0	0	enzyme inhibitor activity	0
GO:0004871	0.0223	41	0	0	0	0	signal transducer activity	0
GO:0004872	0.0647	245	11	0	0	0	receptor activity	0
GO:0005198	0.278	1246	230	114	60	35	structural molecule activity	0
GO:0005215	0.1414	6028	324	57	2	1	transporter activity	0
GO:0005315	0.3122	31	9	3	0	0	inorganic phosphate transmembrane transporter activity	0
GO:0005351	0.0999	41	4	1	0	0	sugar:hydrogen symporter activity	0
GO:0005402	0.0999	41	4	1	0	0	cation:sugar symporter activity	0
GO:0005488	0.4619	15792	15792	3819	486	66	binding	0
GO:0005506	0.0317	105	4	0	0	0	iron ion binding	0
GO:0005515	0.0223	29	0	0	0	0	protein binding	0
GO:0005524	0.1957	7597	554	159	62	17	ATP binding	0
GO:0005525	0.0663	24	0	0	0	0	GTP binding	0
GO:0005618	0.0532	50	19	2	0	0	cell wall	0
GO:0005622	0.2887	15792	1608	636	251	34	intracellular	0
GO:0005623	0.3407	15792	5009	1411	334	37	cell	0
GO:0005694	0.2191	254	78	34	19	11	chromosome	0
GO:0005737	0.3095	9912	1241	445	175	32	cytoplasm	0
GO:0005829	0.0293	18	4	1	0	0	cytosol	0
GO:0005840	0.3018	1131	227	106	60	35	ribosome	0
GO:0005886	0.1247	4961	0	0	0	0	plasma membrane	0
GO:0005975	0.1054	2538	43	4	0	0	carbohydrate metabolic process	0
GO:0005976	0.0331	17	2	0	0	0	polysaccharide metabolic process	0
GO:0005996	0.0444	52	2	1	0	0	monosaccharide metabolic process	0
GO:0006006	0.0672	31	0	0	0	0	glucose metabolic process	0
GO:0006007	0.069	32	0	0	0	0	glucose catabolic process	0
GO:0006022	0.0607	88	0	0	0	0	aminoglycan metabolic process	0
GO:0006023	0.2322	72	0	0	0	0	aminoglycan biosynthetic process	0
GO:0006024	0.2322	72	0	0	0	0	glycosaminoglycan biosynthetic process	0
GO:0006066	0.0806	18	0	0	0	0	alcohol metabolic process	0
GO:0006081	0.1466	30	9	3	0	0	cellular aldehyde metabolic process	0
GO:0006082	0.2007	2427	346	115	29	14	organic acid metabolic process	0
GO:0006084	0.0485	13	0	0	0	0	acetyl-CoA metabolic process	0
GO:0006090	0.2445	29	8	3	0	0	pyruvate metabolic process	0
GO:0006091	0.0964	367	92	29	0	0	generation of precursor metabolites and energy	0
GO:0006098	0.0722	32	3	0	0	0	pentose-phosphate shunt	0
GO:0006105	0.1177	5	0	0	0	0	succinate metabolic process	0
GO:0006119	0.0981	15	0	0	0	0	oxidative phosphorylation	0
GO:0006139	0.2684	15792	3003	419	99	3	nucleobase-containing compound metabolic process	0
GO:0006152	0.0613	130	0	0	0	0	purine nucleoside catabolic process	0
GO:0006163	0.0829	726	15	6	4	3	purine nucleotide metabolic process	0
GO:0006164	0.1147	197	42	15	6	2	purine nucleotide biosynthetic process	0
GO:0006184	0.0498	14	0	0	0	0	GTP catabolic process	0
GO:0006188	0.0992	24	2	1	0	0	IMP biosynthetic process	0
GO:0006189	0.0992	24	2	1	0	0	'de novo' IMP biosynthetic process	0
GO:0006195	0.0595	122	0	0	0	0	purine nucleotide catabolic process	0
GO:0006200	0.064	147	0	0	0	0	ATP catabolic process	0
GO:0006213	0.0964	45	0	0	0	0	pyrimidine nucleoside metabolic process	0
GO:0006220	0.1096	55	0	0	0	0	pyrimidine nucleotide metabolic process	0
GO:0006221	0.0763	45	0	0	0	0	pyrimidine nucleotide biosynthetic process	0
GO:0006222	0.0816	2	0	0	0	0	UMP biosynthetic process	0
GO:0006259	0.1164	3992	79	0	0	0	DNA metabolic process	0
GO:0006260	0.0483	150	5	2	0	0	DNA replication	0
GO:0006261	0.0693	77	5	2	1	1	DNA-dependent DNA replication	0
GO:0006265	0.0286	15	3	2	1	1	DNA topological change	0
GO:0006269	0.0393	8	0	0	0	0	DNA replication, synthesis of RNA primer	0
GO:0006276	0.1118	13	0	0	0	0	plasmid maintenance	0
GO:0006281	0.0496	173	0	0	0	0	DNA repair	0
GO:0006304	0.0387	16	0	0	0	0	DNA modification	0
GO:0006310	0.0627	421	5	0	0	0	DNA recombination	0
GO:0006313	0.0647	164	18	6	2	2	transposition, DNA-mediated	0
GO:0006323	0.0447	4	0	0	0	0	DNA packaging	0
GO:0006351	0.0839	3491	0	0	0	0	transcription, DNA-templated	0
GO:0006355	0.0828	3639	0	0	0	0	regulation of transcription, DNA-templated	0
GO:0006364	0.0581	7	0	0	0	0	rRNA processing	0
GO:0006396	0.0844	444	0	0	0	0	RNA processing	0
GO:0006399	0.1652	537	66	20	1	1	tRNA metabolic process	0
GO:0006412	0.3169	1724	346	172	81	36	translation	0
GO:0006414	0.0825	24	4	1	0	0	translational elongation	0
GO:0006417	0.0624	30	5	2	0	0	regulation of translation	0
GO:0006418	0.305	193	45	11	1	1	tRNA aminoacylation for protein translation	0
GO:0006426	0.3351	21	8	4	1	1	glycyl-tRNA aminoacylation	0
GO:0006448	0.149	20	4	1	0	0	regulation of translational elongation	0
GO:0006450	0.1632	20	4	1	0	0	regulation of translational fidelity	0
GO:0006451	0.5235	18	3	1	1	1	translational readthrough	0
GO:0006457	0.0327	17	3	1	0	0	protein folding	0
GO:0006461	0.0206	21	0	0	0	0	protein complex assembly	0
GO:0006520	0.2271	1607	271	99	29	15	cellular amino acid metabolic process	0
GO:0006525	0.1412	40	10	2	1	1	arginine metabolic process	0
GO:0006526	0.2324	38	10	2	1	1	arginine biosynthetic process	0
GO:0006527	0.0489	5	0	0	0	0	arginine catabolic process	0
GO:0006536	0.0247	4	0	0	0	0	glutamate metabolic process	0
GO:0006541	0.0355	19	0	0	0	0	glutamine metabolic process	0
GO:0006544	0.0772	16	0	0	0	0	glycine metabolic process	0
GO:0006546	0.1785	17	0	0	0	0	glycine catabolic process	0
GO:0006547	0.3543	71	24	14	9	2	histidine metabolic process	0
GO:0006551	0.3247	27	7	1	0	0	leucine metabolic process	0
GO:0006560	0.3545	20	1	0	0	0	proline metabolic process	0
GO:0006561	0.3545	20	1	0	0	0	proline biosynthetic process	0
GO:0006568	0.1527	29	5	3	0	0	tryptophan metabolic process	0
GO:0006575	0.0468	20	5	4	1	1	cellular modified amino acid metabolic process	0
GO:0006576	0.1481	78	10	5	1	0	cellular biogenic amine metabolic process	0
GO:0006580	0.2275	22	0	0	0	0	ethanolamine metabolic process	0
GO:0006586	0.1527	29	5	3	0	0	indolalkylamine metabolic process	0
GO:0006629	0.0539	232	23	1	0	0	lipid metabolic process	0
GO:0006631	0.0225	35	6	5	3	3	fatty acid metabolic process	0
GO:0006633	0.026	33	5	5	3	3	fatty acid biosynthetic process	0
GO:0006637	0.0412	7	0	0	0	0	acyl-CoA metabolic process	0
GO:0006643	0.0699	47	10	3	0	0	membrane lipid metabolic process	0
GO:0006644	0.068	85	6	0	0	0	phospholipid metabolic process	0
GO:0006664	0.078	47	10	3	0	0	glycolipid metabolic process	0
GO:0006720	0.0892	27	9	3	0	0	isoprenoid metabolic process	0
GO:0006721	0.1099	29	9	3	0	0	terpenoid metabolic process	0
GO:0006725	0.2943	15792	4049	633	137	4	cellular aromatic compound metabolic process	0
GO:0006730	0.2207	122	10	0	0	0	one-carbon metabolic process	0
GO:0006732	0.088	465	15	2	0	0	coenzyme metabolic process	0
GO:0006733	0.095	73	17	0	0	0	oxidoreduction coenzyme metabolic process	0
GO:0006739	0.0811	31	4	0	0	0	NADP metabolic process	0
GO:0006740	0.0687	32	3	0	0	0	NADPH regeneration	0
GO:0006753	0.1283	1452	86	44	13	6	nucleoside phosphate metabolic process	0
GO:0006754	0.1362	88	27	18	7	0	ATP biosynthetic process	0
GO:0006766	0.2358	340	93	48	25	15	vitamin metabolic process	0
GO:0006767	0.2358	340	93	48	25	15	water-soluble vitamin metabolic process	0
GO:0006771	0.2863	38	14	9	4	2	riboflavin metabolic process	0
GO:0006772	0.0272	11	3	2	1	1	thiamine metabolic process	0
GO:0006777	0.1798	41	1	0	0	0	Mo-molybdopterin cofactor biosynthetic process	0
GO:0006778	0.0548	51	13	8	5	4	porphyrin-containing compound metabolic process	0
GO:0006779	0.0649	50	13	8	5	4	porphyrin-containing compound biosynthetic process	0
GO:0006782	0.2391	28	1	0	0	0	protoporphyrinogen IX biosynthetic process	0
GO:0006783	0.1593	29	3	1	0	0	heme biosynthetic process	0
GO:0006790	0.0439	48	0	0	0	0	sulfur compound metabolic process	0
GO:0006793	0.1567	8203	262	65	20	9	phosphorus metabolic process	0
GO:0006796	0.1488	7678	192	54	20	10	phosphate-containing compound metabolic process	0
GO:0006807	0.3382	15792	6626	907	254	7	nitrogen compound metabolic process	0
GO:0006810	0.1806	15792	747	130	30	11	transport	0
GO:0006811	0.1005	813	108	64	23	8	ion transport	0
GO:0006812	0.0924	216	66	40	28	20	cation transport	0
GO:0006813	0.0394	32	11	7	4	3	potassium ion transport	0
GO:0006814	0.0819	90	23	14	8	6	sodium ion transport	0
GO:0006817	0.326	46	8	6	3	2	phosphate ion transport	0
GO:0006818	0.0463	95	31	21	13	8	hydrogen transport	0
GO:0006820	0.0639	226	11	0	0	0	anion transport	0
GO:0006865	0.02	39	3	2	0	0	amino acid transport	0
GO:0006869	0.1171	23	0	0	0	0	lipid transport	0
GO:0006928	0.1639	276	63	11	0	0	cellular component movement	0
GO:0006935	0.07	187	7	2	0	0	chemotaxis	0
GO:0006950	0.0609	577	0	0	0	0	response to stress	0
GO:0006952	0.0464	69	24	18	15	9	defense response	0
GO:0006974	0.0496	167	0	0	0	0	cellular response to DNA damage stimulus	0
GO:0006996	0.0425	42	0	0	0	0	organelle organization	0
GO:0007049	0.0471	97	6	1	0	0	cell cycle	0
GO:0007059	0.1382	23	7	4	1	1	chromosome segregation	0
GO:0007154	0.033	20	0	0	0	0	cell communication	0
GO:0007155	0.0821	217	0	0	0	0	cell adhesion	0
GO:0007165	0.0298	52	0	0	0	0	signal transduction	0
GO:0008026	0.0123	13	2	1	0	0	ATP-dependent helicase activity	0
GO:0008094	0.0901	30	4	2	1	1	DNA-dependent ATPase activity	0
GO:0008104	0.0698	642	36	1	0	0	protein localization	0
GO:0008137	0.1384	49	15	8	0	0	NADH dehydrogenase (ubiquinone) activity	0
GO:0008152	0.6074	15792	15792	15792	2447	350	metabolic process	0
GO:0008168	0.0531	91	0	0	0	0	methyltransferase activity	0
GO:0008172	0.1688	75	2	0	0	0	S-methyltransferase activity	0
GO:0008233	0.0394	2	0	0	0	0	peptidase activity	0
GO:0008272	0.0635	30	11	6	4	3	sulfate transport	0
GO:0008299	0.0958	27	9	3	0	0	isoprenoid biosynthetic process	0
GO:0008324	0.0706	209	54	28	12	1	cation transmembrane transporter activity	0
GO:0008360	0.0952	63	6	0	0	0	regulation of cell shape	0
GO:0008410	0.1257	17	6	4	2	2	CoA-transferase activity	0
GO:0008509	0.0724	153	11	5	0	0	anion transmembrane transporter activity	0
GO:0008556	0.1632	31	10	6	4	3	potassium-transporting ATPase activity	0
GO:0008610	0.061	243	23	3	0	0	lipid biosynthetic process	0
GO:0008616	0.1112	17	0	0	0	0	queuosine biosynthetic process	0
GO:0008643	0.2164	268	68	33	18	7	carbohydrate transport	0
GO:0008652	0.2487	862	177	70	28	17	cellular amino acid biosynthetic process	0
GO:0008654	0.0719	82	8	0	0	0	phospholipid biosynthetic process	0
GO:0008746	0.1016	20	4	2	0	0	NAD(P)+ transhydrogenase activity	0
GO:0008750	0.1532	20	4	2	0	0	NAD(P)+ transhydrogenase (AB-specific) activity	0
GO:0008851	0.1621	20	5	4	2	2	ethanolamine ammonia-lyase activity	0
GO:0008901	0.0608	19	5	4	2	2	ferredoxin hydrogenase activity	0
GO:0008915	0.0642	1	0	0	0	0	lipid-A-disaccharide synthase activity	0
GO:0008940	0.3512	29	4	1	0	0	nitrate reductase activity	0
GO:0008982	0.2247	98	17	0	0	0	protein-N(PI)-phosphohistidine-sugar phosphotransferase activity	0
GO:0008988	0.1801	5	0	0	0	0	rRNA (adenine-N6-)-methyltransferase activity	0
GO:0009039	0.7255	30	10	4	1	1	urease activity	0
GO:0009055	0.0586	449	48	25	3	0	electron carrier activity	0
GO:0009056	0.0949	1363	22	1	0	0	catabolic process	0
GO:0009058	0.3064	15792	3536	845	302	67	biosynthetic process	0
GO:0009059	0.2017	15792	1132	235	108	45	macromolecule biosynthetic process	0
GO:0009061	0.4272	207	67	34	5	0	anaerobic respiration	0
GO:0009063	0.0532	44	0	0	0	0	cellular amino acid catabolic process	0
GO:0009064	0.0924	126	10	0	0	0	glutamine family amino acid metabolic process	0
GO:0009065	0.0652	24	0	0	0	0	glutamine family amino acid catabolic process	0
GO:0009066	0.0374	2	0	0	0	0	aspartate family amino acid metabolic process	0
GO:0009067	0.0415	4	0	0	0	0	aspartate family amino acid biosynthetic process	0
GO:0009069	0.0319	3	0	0	0	0	serine family amino acid metabolic process	0
GO:0009071	0.1785	17	0	0	0	0	serine family amino acid catabolic process	0
GO:0009072	0.0847	82	5	2	0	0	aromatic amino acid family metabolic process	0
GO:0009073	0.1143	82	5	2	0	0	aromatic amino acid family biosynthetic process	0
GO:0009081	0.2051	57	6	0	0	0	branched-chain amino acid metabolic process	0
GO:0009082	0.2201	57	6	0	0	0	branched-chain amino acid biosynthetic process	0
GO:0009084	0.1876	69	15	2	0	0	glutamine family amino acid biosynthetic process	0
GO:0009098	0.3247	27	7	1	0	0	leucine biosynthetic process	0
GO:0009106	0.7779	14	0	0	0	0	lipoate metabolic process	0
GO:0009107	0.7779	14	0	0	0	0	lipoate biosynthetic process	0
GO:0009108	0.0893	315	20	11	2	1	coenzyme biosynthetic process	0
GO:0009110	0.2479	336	93	47	25	15	vitamin biosynthetic process	0
GO:0009116	0.0937	839	32	9	5	4	nucleoside metabolic process	0
GO:0009117	0.1297	1485	86	44	13	6	nucleotide metabolic process	0
GO:0009119	0.0982	839	37	10	5	4	ribonucleoside metabolic process	0
GO:0009123	0.1001	619	49	6	3	2	nucleoside monophosphate metabolic process	0
GO:0009124	0.1498	288	51	22	4	2	nucleoside monophosphate biosynthetic process	0
GO:0009125	0.0585	139	0	0	0	0	nucleoside monophosphate catabolic process	0
GO:0009126	0.0808	437	26	4	2	2	purine nucleoside monophosphate metabolic process	0
GO:0009127	0.1236	125	26	14	9	2	purine nucleoside monophosphate biosynthetic process	0
GO:0009128	0.064	147	0	0	0	0	purine nucleoside monophosphate catabolic process	0
GO:0009129	0.0463	2	0	0	0	0	pyrimidine nucleoside monophosphate metabolic process	0
GO:0009130	0.0463	2	0	0	0	0	pyrimidine nucleoside monophosphate biosynthetic process	0
GO:0009141	0.0762	439	16	4	1	1	nucleoside triphosphate metabolic process	0
GO:0009142	0.12	71	27	17	6	0	nucleoside triphosphate biosynthetic process	0
GO:0009143	0.0615	128	0	0	0	0	nucleoside triphosphate catabolic process	0
GO:0009144	0.0683	333	11	3	1	1	purine nucleoside triphosphate metabolic process	0
GO:0009145	0.1336	89	27	18	7	0	purine nucleoside triphosphate biosynthetic process	0
GO:0009146	0.0613	130	0	0	0	0	purine nucleoside triphosphate catabolic process	0
GO:0009150	0.0853	722	18	6	4	3	purine ribonucleotide metabolic process	0
GO:0009152	0.1241	184	34	16	9	2	purine ribonucleotide biosynthetic process	0
GO:0009154	0.0607	130	0	0	0	0	purine ribonucleotide catabolic process	0
GO:0009156	0.1577	273	54	21	4	2	ribonucleoside monophosphate biosynthetic process	0
GO:0009158	0.064	147	0	0	0	0	ribonucleoside monophosphate catabolic process	0
GO:0009161	0.1031	601	47	6	3	2	ribonucleoside monophosphate metabolic process	0
GO:0009163	0.1425	267	58	22	6	3	nucleoside biosynthetic process	0
GO:0009164	0.06	139	0	0	0	0	nucleoside catabolic process	0
GO:0009165	0.1358	493	95	30	18	6	nucleotide biosynthetic process	0
GO:0009166	0.0542	119	0	0	0	0	nucleotide catabolic process	0
GO:0009167	0.0808	437	26	4	2	2	purine ribonucleoside monophosphate metabolic process	0
GO:0009168	0.1236	125	26	14	9	2	purine ribonucleoside monophosphate biosynthetic process	0
GO:0009169	0.064	147	0	0	0	0	purine ribonucleoside monophosphate catabolic process	0
GO:0009173	0.0816	2	0	0	0	0	pyrimidine ribonucleoside monophosphate metabolic process	0
GO:0009174	0.0816	2	0	0	0	0	pyrimidine ribonucleoside monophosphate biosynthetic process	0
GO:0009199	0.0772	368	16	3	1	1	ribonucleoside triphosphate metabolic process	0
GO:0009201	0.1275	102	27	17	6	0	ribonucleoside triphosphate biosynthetic process	0
GO:0009203	0.0613	130	0	0	0	0	ribonucleoside triphosphate catabolic process	0
GO:0009205	0.0683	333	11	3	1	1	purine ribonucleoside triphosphate metabolic process	0
GO:0009206	0.1336	89	27	18	7	0	purine ribonucleoside triphosphate biosynthetic process	0
GO:0009207	0.0613	130	0	0	0	0	purine ribonucleoside triphosphate catabolic process	0
GO:0009218	0.1648	45	2	0	0	0	pyrimidine ribonucleotide metabolic process	0
GO:0009220	0.1648	45	2	0	0	0	pyrimidine ribonucleotide biosynthetic process	0
GO:0009225	0.0143	8	1	0	0	0	nucleotide-sugar metabolic process	0
GO:0009228	0.0228	9	1	1	0	0	thiamine biosynthetic process	0
GO:0009231	0.2863	38	14	9	4	2	riboflavin biosynthetic process	0
GO:0009235	0.3289	206	54	30	20	14	cobalamin metabolic process	0
GO:0009236	0.3359	206	54	30	20	14	cobalamin biosynthetic process	0
GO:0009240	0.3496	30	8	3	0	0	isopentenyl diphosphate biosynthetic process	0
GO:0009245	0.1658	45	10	3	0	0	lipid A biosynthetic process	0
GO:0009247	0.1255	44	10	3	0	0	glycolipid biosynthetic process	0
GO:0009252	0.2468	72	0	0	0	0	peptidoglycan biosynthetic process	0
GO:0009259	0.1189	890	66	21	5	3	ribonucleotide metabolic process	0
GO:0009260	0.1748	340	70	34	5	3	ribonucleotide biosynthetic process	0
GO:0009261	0.0607	130	0	0	0	0	ribonucleotide catabolic process	0
GO:0009268	0.0473	11	0	0	0	0	response to pH	0
GO:0009273	0.2047	72	0	0	0	0	peptidoglycan-based cell wall biogenesis	0
GO:0009274	0.1829	51	15	7	0	0	peptidoglycan-based cell wall	0
GO:0009276	0.1946	47	14	6	0	0	Gram-negative-bacterium-type cell wall	0
GO:0009279	0.0425	169	0	0	0	0	cell outer membrane	0
GO:0009288	0.1748	329	75	21	1	0	bacterial-type flagellum	0
GO:0009289	0.1836	246	0	0	0	0	pilus	0
GO:0009292	0.0523	6	0	0	0	0	genetic transfer	0
GO:0009294	0.053	13	0	0	0	0	DNA mediated transformation	0
GO:0009306	0.0398	218	0	0	0	0	protein secretion	0
GO:0009308	0.0774	85	12	6	1	0	amine metabolic process	0
GO:0009309	0.1655	31	5	3	0	0	amine biosynthetic process	0
GO:0009311	0.1161	57	17	7	0	0	oligosaccharide metabolic process	0
GO:0009312	0.1351	57	14	7	0	0	oligosaccharide biosynthetic process	0
GO:0009325	0.5188	31	4	1	0	0	nitrate reductase complex	0
GO:0009376	0.7873	21	7	4	1	1	HslUV protease complex	0
GO:0009399	0.2025	67	17	10	0	0	nitrogen fixation	0
GO:0009401	0.3317	233	61	34	18	7	phosphoenolpyruvate-dependent sugar phosphotransferase system	0
GO:0009404	0.0395	34	4	2	1	1	toxin metabolic process	0
GO:0009425	0.1627	120	15	0	0	0	bacterial-type flagellum basal body	0
GO:0009426	0.227	21	2	1	0	0	bacterial-type flagellum basal body, distal rod	0
GO:0009435	0.0863	24	10	6	4	3	NAD biosynthetic process	0
GO:0009451	0.0727	192	0	0	0	0	RNA modification	0
GO:0009521	0.3825	119	40	22	15	6	photosystem	0
GO:0009522	0.1101	27	1	0	0	0	photosystem I	0
GO:0009523	0.2281	75	24	7	0	0	photosystem II	0
GO:0009579	0.1416	181	53	32	20	13	thylakoid	0
GO:0009605	0.0478	123	8	2	0	0	response to external stimulus	0
GO:0009607	0.0628	59	27	19	15	10	response to biotic stimulus	0
GO:0009615	0.1045	64	33	22	13	9	response to virus	0
GO:0009628	0.0157	14	4	3	2	1	response to abiotic stimulus	0
GO:0009653	0.0398	91	8	0	0	0	anatomical structure morphogenesis	0
GO:0009767	0.4908	60	14	2	0	0	photosynthetic electron transport chain	0
GO:0009772	0.2436	31	2	0	0	0	photosynthetic electron transport in photosystem II	0
GO:0009847	0.0815	103	0	0	0	0	spore germination	0
GO:0009889	0.0854	3788	0	0	0	0	regulation of biosynthetic process	0
GO:0009891	0.0273	12	4	1	0	0	positive regulation of biosynthetic process	0
GO:0009893	0.0246	12	4	1	0	0	positive regulation of metabolic process	0
GO:0009987	0.5119	15792	15792	5781	1145	273	cellular process	0
GO:0010035	0.0607	52	14	9	6	4	response to inorganic substance	0
GO:0010038	0.0654	44	15	9	6	4	response to metal ion	0
GO:0010467	0.2014	15792	1005	279	101	45	gene expression	0
GO:0010468	0.0873	4229	0	0	0	0	regulation of gene expression	0
GO:0010556	0.0854	3788	0	0	0	0	regulation of macromolecule biosynthetic process	0
GO:0010557	0.0273	12	4	1	0	0	positive regulation of macromolecule biosynthetic process	0
GO:0010604	0.0273	12	4	1	0	0	positive regulation of macromolecule metabolic process	0
GO:0010608	0.0588	30	5	2	0	0	posttranscriptional regulation of gene expression	0
GO:0010628	0.0369	16	6	4	2	1	positive regulation of gene expression	0
GO:0010876	0.1171	23	0	0	0	0	lipid localization	0
GO:0015031	0.0691	605	36	1	0	0	protein transport	0
GO:0015074	0.0432	77	6	0	0	0	DNA integration	0
GO:0015075	0.0829	553	79	26	0	0	ion transmembrane transporter activity	0
GO:0015077	0.0442	149	48	32	19	14	monovalent inorganic cation transmembrane transporter activity	0
GO:0015078	0.0316	102	40	25	14	9	hydrogen ion transmembrane transporter activity	0
GO:0015079	0.0478	30	11	5	4	3	potassium ion transmembrane transporter activity	0
GO:0015081	0.0129	6	0	0	0	0	sodium ion transmembrane transporter activity	0
GO:0015097	0.1259	14	0	0	0	0	mercury ion transmembrane transporter activity	0
GO:0015098	0.1115	17	3	2	0	0	molybdate ion transmembrane transporter activity	0
GO:0015103	0.1003	58	12	10	1	1	inorganic anion transmembrane transporter activity	0
GO:0015116	0.091	30	9	6	4	3	sulfate transmembrane transporter activity	0
GO:0015144	0.1825	131	36	7	0	0	carbohydrate transmembrane transporter activity	0
GO:0015197	0.0598	11	4	2	1	1	peptide transporter activity	0
GO:0015235	0.3234	55	13	8	1	1	cobalamin transporter activity	0
GO:0015267	0.0103	1	0	0	0	0	channel activity	0
GO:0015291	0.0481	59	4	1	0	0	secondary active transmembrane transporter activity	0
GO:0015293	0.0634	60	4	1	0	0	symporter activity	0
GO:0015294	0.0637	48	4	1	0	0	solute:cation symporter activity	0
GO:0015295	0.0999	41	4	1	0	0	solute:hydrogen symporter activity	0
GO:0015370	0.0179	7	0	0	0	0	solute:sodium symporter activity	0
GO:0015399	0.1159	227	62	33	18	0	primary active transmembrane transporter activity	0
GO:0015405	0.1159	227	62	33	18	0	P-P-bond-hydrolysis-driven transmembrane transporter activity	0
GO:0015419	0.1047	29	9	6	4	3	sulfate transmembrane-transporting ATPase activity	0
GO:0015420	0.3496	53	13	8	1	1	cobalamin-transporting ATPase activity	0
GO:0015604	0.1922	34	11	6	4	3	organic phosphonate transmembrane transporter activity	0
GO:0015662	0.0806	30	11	6	4	3	ATPase activity, coupled to transmembrane movement of ions, phosphorylative mechanism	0
GO:0015672	0.0745	217	56	36	24	18	monovalent inorganic cation transport	0
GO:0015689	0.1115	17	3	2	0	0	molybdate ion transport	0
GO:0015694	0.1259	14	0	0	0	0	mercury ion transport	0
GO:0015698	0.1504	100	27	16	2	1	inorganic anion transport	0
GO:0015711	0.0297	8	2	1	0	0	organic anion transport	0
GO:0015716	0.2537	30	10	4	2	2	organic phosphonate transport	0
GO:0015774	0.1046	17	3	1	0	0	polysaccharide transport	0
GO:0015833	0.0339	11	4	2	1	1	peptide transport	0
GO:0015849	0.0302	7	2	1	0	0	organic acid transport	0
GO:0015920	0.2459	23	0	0	0	0	lipopolysaccharide transport	0
GO:0015935	0.1866	32	0	0	0	0	small ribosomal subunit	0
GO:0015939	0.4036	31	6	4	1	1	pantothenate metabolic process	0
GO:0015940	0.4951	31	6	4	1	1	pantothenate biosynthetic process	0
GO:0015947	0.4856	207	67	34	5	0	methane metabolic process	0
GO:0015975	0.4856	207	67	34	5	0	energy derivation by oxidation of reduced inorganic compounds	0
GO:0015979	0.1167	205	61	33	19	13	photosynthesis	0
GO:0015980	0.1019	208	67	34	5	0	energy derivation by oxidation of organic compounds	0
GO:0015985	0.1362	88	27	18	7	0	energy coupled proton transport, down electrochemical gradient	0
GO:0015986	0.1362	88	27	18	7	0	ATP synthesis coupled proton transport	0
GO:0015988	0.1464	56	18	6	0	0	energy coupled proton transmembrane transport, against electrochemical gradient	0
GO:0015991	0.1605	56	18	6	0	0	ATP hydrolysis coupled proton transport	0
GO:0015992	0.0463	95	31	21	13	8	proton transport	0
GO:0015994	0.0316	6	0	0	0	0	chlorophyll metabolic process	0
GO:0015995	0.0334	6	0	0	0	0	chlorophyll biosynthetic process	0
GO:0016020	0.2739	15792	5235	68	14	8	membrane	0
GO:0016021	0.1771	15790	677	19	0	0	integral component of membrane	0
GO:0016032	0.1912	102	33	7	0	0	viral process	0
GO:0016043	0.0826	796	0	0	0	0	cellular component organization	0
GO:0016052	0.0429	56	5	2	1	1	carbohydrate catabolic process	0
GO:0016053	0.1869	1056	170	73	28	15	organic acid biosynthetic process	0
GO:0016054	0.0871	43	0	0	0	0	organic acid catabolic process	0
GO:0016070	0.1278	11301	180	7	2	1	RNA metabolic process	0
GO:0016072	0.0581	7	0	0	0	0	rRNA metabolic process	0
GO:0016114	0.1099	29	9	3	0	0	terpenoid biosynthetic process	0
GO:0016151	0.2082	58	17	10	6	2	nickel cation binding	0
GO:0016163	0.1614	20	2	0	0	0	nitrogenase activity	0
GO:0016168	0.4532	46	13	8	1	1	chlorophyll binding	0
GO:0016337	0.1767	21	4	0	0	0	cell-cell adhesion	0
GO:0016405	0.1702	18	0	0	0	0	CoA-ligase activity	0
GO:0016433	0.0663	4	0	0	0	0	rRNA (adenine) methyltransferase activity	0
GO:0016462	0.121	1790	176	24	6	0	pyrophosphatase activity	0
GO:0016469	0.1274	84	29	18	9	2	proton-transporting two-sector ATPase complex	0
GO:0016491	0.1118	5199	142	34	5	4	oxidoreductase activity	0
GO:0016628	0.0342	4	0	0	0	0	oxidoreductase activity, acting on the CH-CH group of donors, NAD or NADP as acceptor	0
GO:0016651	0.1807	205	53	26	18	7	oxidoreductase activity, acting on NAD(P)H	0
GO:0016652	0.3227	17	4	0	0	0	oxidoreductase activity, acting on NAD(P)H, NAD(P) as acceptor	0
GO:0016655	0.2427	183	53	26	18	7	oxidoreductase activity, acting on NAD(P)H, quinone or similar compound as acceptor	0
GO:0016661	0.087	28	2	1	0	0	oxidoreductase activity, acting on other nitrogenous compounds as donors	0
GO:0016695	0.122	47	6	3	2	2	oxidoreductase activity, acting on hydrogen as donor	0
GO:0016699	0.0608	19	5	4	2	2	oxidoreductase activity, acting on hydrogen as donor, iron-sulfur protein as acceptor	0
GO:0016725	0.0169	3	0	0	0	0	oxidoreductase activity, acting on CH or CH2 groups	0
GO:0016730	0.0773	26	6	4	2	2	oxidoreductase activity, acting on iron-sulfur proteins as donors	0
GO:0016732	0.1614	20	2	0	0	0	oxidoreductase activity, acting on iron-sulfur proteins as donors, dinitrogen as acceptor	0
GO:0016740	0.2248	15789	936	0	0	0	transferase activity	0
GO:0016741	0.053	135	0	0	0	0	transferase activity, transferring one-carbon groups	0
GO:0016746	0.0465	3	0	0	0	0	transferase activity, transferring acyl groups	0
GO:0016747	0.0382	16	0	0	0	0	transferase activity, transferring acyl groups other than amino-acyl groups	0
GO:0016757	0.026	32	2	1	0	0	transferase activity, transferring glycosyl groups	0
GO:0016763	0.047	53	2	1	0	0	transferase activity, transferring pentosyl groups	0
GO:0016772	0.0815	874	23	0	0	0	transferase activity, transferring phosphorus-containing groups	0
GO:0016773	0.0375	129	7	0	0	0	phosphotransferase activity, alcohol group as acceptor	0
GO:0016779	0.0378	49	4	2	1	1	nucleotidyltransferase activity	0
GO:0016782	0.0661	65	12	1	0	0	transferase activity, transferring sulfur-containing groups	0
GO:0016787	0.2817	15792	3346	172	70	27	hydrolase activity	0
GO:0016788	0.1278	3378	152	97	49	25	hydrolase activity, acting on ester bonds	0
GO:0016798	0.0837	690	36	1	0	0	hydrolase activity, acting on glycosyl bonds	0
GO:0016810	0.0302	44	11	4	0	0	hydrolase activity, acting on carbon-nitrogen (but not peptide) bonds	0
GO:0016811	0.0156	34	11	4	0	0	hydrolase activity, acting on carbon-nitrogen (but not peptide) bonds, in linear amides	0
GO:0016817	0.1197	1800	176	24	6	0	hydrolase activity, acting on acid anhydrides	0
GO:0016818	0.1207	1802	176	24	6	0	hydrolase activity, acting on acid anhydrides, in phosphorus-containing anhydrides	0
GO:0016820	0.1395	206	59	33	18	0	hydrolase activity, acting on acid anhydrides, catalyzing transmembrane movement of substances	0
GO:0016829	0.0725	944	0	0	0	0	lyase activity	0
GO:0016835	0.0474	185	0	0	0	0	carbon-oxygen lyase activity	0
GO:0016836	0.0884	170	1	0	0	0	hydro-lyase activity	0
GO:0016837	0.0854	4	0	0	0	0	carbon-oxygen lyase activity, acting on polysaccharides	0
GO:0016840	0.0328	21	6	4	2	2	carbon-nitrogen lyase activity	0
GO:0016841	0.0445	20	6	4	2	2	ammonia-lyase activity	0
GO:0016851	0.3086	10	1	0	0	0	magnesium chelatase activity	0
GO:0016853	0.0361	36	2	1	0	0	isomerase activity	0
GO:0016859	0.017	21	2	0	0	0	cis-trans isomerase activity	0
GO:0016874	0.1113	530	81	8	1	1	ligase activity	0
GO:0016875	0.19	221	46	11	1	1	ligase activity, forming carbon-oxygen bonds	0
GO:0016876	0.19	221	46	11	1	1	ligase activity, forming aminoacyl-tRNA and related compounds	0
GO:0016877	0.086	7	0	0	0	0	ligase activity, forming carbon-sulfur bonds	0
GO:0016878	0.086	7	0	0	0	0	acid-thiol ligase activity	0
GO:0016879	0.1103	227	16	4	1	1	ligase activity, forming carbon-nitrogen bonds	0
GO:0016881	0.114	27	0	0	0	0	acid-amino acid ligase activity	0
GO:0016884	0.1158	56	7	4	2	2	carbon-nitrogen ligase activity, with glutamine as amido-N-donor	0
GO:0016887	0.108	593	90	2	0	0	ATPase activity	0
GO:0017004	0.0265	33	0	0	0	0	cytochrome complex assembly	0
GO:0017076	0.2142	11227	726	225	86	10	purine nucleotide binding	0
GO:0017111	0.1201	1524	182	24	6	0	nucleoside-triphosphatase activity	0
GO:0018130	0.1556	15792	479	113	46	2	heterocycle biosynthetic process	0
GO:0018193	0.036	6	0	0	0	0	peptidyl-amino acid modification	0
GO:0018208	0.017	21	2	0	0	0	peptidyl-proline modification	0
GO:0018298	0.0331	11	0	0	0	0	protein-chromophore linkage	0
GO:0018493	0.1416	7	0	0	0	0	formylmethanofuran dehydrogenase activity	0
GO:0018697	0.1614	20	2	0	0	0	carbonyl sulfide nitrogenase activity	0
GO:0018822	0.4437	42	9	1	0	0	nitrile hydratase activity	0
GO:0019001	0.0446	24	0	0	0	0	guanyl nucleotide binding	0
GO:0019012	0.2322	248	102	56	38	12	virion	0
GO:0019015	0.6144	187	69	46	31	11	viral genome	0
GO:0019028	0.0569	32	9	5	1	1	viral capsid	0
GO:0019038	0.6144	187	69	46	31	11	provirus	0
GO:0019058	0.1139	72	14	5	3	3	viral life cycle	0
GO:0019068	0.1552	75	13	5	3	3	virion assembly	0
GO:0019069	0.2947	75	12	5	2	2	viral capsid assembly	0
GO:0019219	0.0855	4127	0	0	0	0	regulation of nucleobase-containing compound metabolic process	0
GO:0019222	0.0933	5950	0	0	0	0	regulation of metabolic process	0
GO:0019288	0.3496	30	8	3	0	0	isopentenyl diphosphate biosynthetic process, methylerythritol 4-phosphate pathway	0
GO:0019318	0.0363	29	0	0	0	0	hexose metabolic process	0
GO:0019320	0.0682	33	0	0	0	0	hexose catabolic process	0
GO:0019359	0.1645	40	10	5	4	3	nicotinamide nucleotide biosynthetic process	0
GO:0019362	0.1032	70	18	1	0	0	pyridine nucleotide metabolic process	0
GO:0019363	0.1432	41	10	5	4	3	pyridine nucleotide biosynthetic process	0
GO:0019386	0.4755	103	11	0	0	0	methanogenesis, from carbon dioxide	0
GO:0019438	0.1525	15614	428	124	28	1	aromatic compound biosynthetic process	0
GO:0019439	0.054	306	0	0	0	0	aromatic compound catabolic process	0
GO:0019538	0.1906	5426	561	202	106	40	protein metabolic process	0
GO:0019545	0.1177	5	0	0	0	0	arginine catabolic process to succinate	0
GO:0019627	0.4242	61	13	8	2	1	urea metabolic process	0
GO:0019634	0.4521	57	18	7	1	0	organic phosphonate metabolic process	0
GO:0019637	0.1537	3268	218	62	14	6	organophosphate metabolic process	0
GO:0019674	0.1646	41	11	5	4	3	NAD metabolic process	0
GO:0019682	0.3496	30	8	3	0	0	glyceraldehyde-3-phosphate metabolic process	0
GO:0019684	0.1406	74	16	2	0	0	photosynthesis, light reaction	0
GO:0019693	0.1225	977	67	25	6	3	ribose phosphate metabolic process	0
GO:0019700	0.5865	18	1	0	0	0	organic phosphonate catabolic process	0
GO:0019720	0.1798	41	1	0	0	0	Mo-molybdopterin cofactor metabolic process	0
GO:0019748	0.027	27	4	2	1	1	secondary metabolic process	0
GO:0019752	0.1994	2384	334	107	30	13	carboxylic acid metabolic process	0
GO:0019829	0.2023	116	37	23	11	1	cation-transporting ATPase activity	0
GO:0019843	0.4152	465	115	58	35	6	rRNA binding	0
GO:0019867	0.0527	271	0	0	0	0	outer membrane	0
GO:0020037	0.0404	282	22	3	0	0	heme binding	0
GO:0022603	0.0929	63	6	0	0	0	regulation of anatomical structure morphogenesis	0
GO:0022604	0.0952	63	6	0	0	0	regulation of cell morphogenesis	0
GO:0022607	0.0566	281	0	0	0	0	cellular component assembly	0
GO:0022610	0.0551	210	0	0	0	0	biological adhesion	0
GO:0022613	0.065	43	0	0	0	0	ribonucleoprotein complex biogenesis	0
GO:0022803	0.0103	1	0	0	0	0	passive transmembrane transporter activity	0
GO:0022804	0.1112	579	90	39	2	2	active transmembrane transporter activity	0
GO:0022857	0.1042	1512	142	60	3	1	transmembrane transporter activity	0
GO:0022890	0.0698	149	48	30	19	11	inorganic cation transmembrane transporter activity	0
GO:0022891	0.0957	998	111	42	0	0	substrate-specific transmembrane transporter activity	0
GO:0022892	0.0913	929	124	38	0	0	substrate-specific transporter activity	0
GO:0022900	0.0707	176	20	2	0	0	electron transport chain	0
GO:0023052	0.0297	52	0	0	0	0	signaling	0
GO:0030001	0.0405	105	31	18	12	10	metal ion transport	0
GO:0030030	0.0516	110	0	0	0	0	cell projection organization	0
GO:0030031	0.0384	1	0	0	0	0	cell projection assembly	0
GO:0030153	0.1695	27	7	2	1	1	bacteriocin immunity	0
GO:0030170	0.045	18	5	1	0	0	pyridoxal phosphate binding	0
GO:0030203	0.0631	86	0	0	0	0	glycosaminoglycan metabolic process	0
GO:0030234	0.0305	9	0	0	0	0	enzyme regulator activity	0
GO:0030260	0.2071	19	2	0	0	0	entry into host cell	0
GO:0030261	0.0925	5	0	0	0	0	chromosome condensation	0
GO:0030269	0.4892	74	2	0	0	0	tetrahydromethanopterin S-methyltransferase activity	0
GO:0030288	0.0615	54	19	8	3	1	outer membrane-bounded periplasmic space	0
GO:0030312	0.0633	600	17	7	3	1	external encapsulating structure	0
GO:0030313	0.0705	583	14	7	3	1	cell envelope	0
GO:0030420	0.071	19	0	0	0	0	establishment of competence for transformation	0
GO:0030529	0.3097	1317	262	119	67	34	ribonucleoprotein complex	0
GO:0030554	0.1962	8433	575	161	63	17	adenyl nucleotide binding	0
GO:0030599	0.5401	42	11	10	3	2	pectinesterase activity	0
GO:0030694	0.4083	19	0	0	0	0	bacterial-type flagellum basal body, rod	0
GO:0030699	0.2497	33	2	0	0	0	glycine reductase activity	0
GO:0031167	0.0805	5	0	0	0	0	rRNA methylation	0
GO:0031224	0.178	15790	758	19	0	0	intrinsic component of membrane	0
GO:0031323	0.089	4452	0	0	0	0	regulation of cellular metabolic process	0
GO:0031325	0.0246	12	4	1	0	0	positive regulation of cellular metabolic process	0
GO:0031326	0.0854	3788	0	0	0	0	regulation of cellular biosynthetic process	0
GO:0031328	0.0273	12	4	1	0	0	positive regulation of cellular biosynthetic process	0
GO:0031344	0.038	12	0	0	0	0	regulation of cell projection organization	0
GO:0031597	0.7873	21	7	4	1	1	cytosolic proteasome complex	0
GO:0031975	0.07	583	14	7	3	1	envelope	0
GO:0032259	0.0501	64	2	0	0	0	methylation	0
GO:0032268	0.0524	32	5	2	0	0	regulation of cellular protein metabolic process	0
GO:0032324	0.1798	41	1	0	0	0	molybdopterin cofactor biosynthetic process	0
GO:0032502	0.0726	305	0	0	0	0	developmental process	0
GO:0032506	0.0132	9	1	0	0	0	cytokinetic process	0
GO:0032549	0.2193	10356	721	232	83	10	ribonucleoside binding	0
GO:0032550	0.2187	10356	709	223	82	10	purine ribonucleoside binding	0
GO:0032553	0.2107	12578	693	229	82	11	ribonucleotide binding	0
GO:0032555	0.2129	10552	711	223	82	10	purine ribonucleotide binding	0
GO:0032559	0.1952	7492	555	159	62	17	adenyl ribonucleotide binding	0
GO:0032561	0.0446	24	0	0	0	0	guanyl ribonucleotide binding	0
GO:0032774	0.0876	3966	0	0	0	0	RNA biosynthetic process	0
GO:0032787	0.0522	55	10	0	0	0	monocarboxylic acid metabolic process	0
GO:0032940	0.0398	218	0	0	0	0	secretion by cell	0
GO:0032989	0.0854	94	10	0	0	0	cellular component morphogenesis	0
GO:0032991	0.1914	2281	420	188	89	48	macromolecular complex	0
GO:0033013	0.2032	285	77	44	28	17	tetrapyrrole metabolic process	0
GO:0033014	0.2214	282	77	44	28	17	tetrapyrrole biosynthetic process	0
GO:0033036	0.079	729	53	1	0	0	macromolecule localization	0
GO:0033037	0.1046	17	3	1	0	0	polysaccharide localization	0
GO:0033043	0.038	12	0	0	0	0	regulation of organelle organization	0
GO:0033178	0.1739	45	14	1	0	0	proton-transporting two-sector ATPase complex, catalytic domain	0
GO:0033554	0.0605	237	0	0	0	0	cellular response to stress	0
GO:0034062	0.0487	16	0	0	0	0	RNA polymerase activity	0
GO:0034220	0.0817	143	42	24	14	8	ion transmembrane transport	0
GO:0034470	0.0892	433	0	0	0	0	ncRNA processing	0
GO:0034622	0.0226	20	0	0	0	0	cellular macromolecular complex assembly	0
GO:0034637	0.0225	4	0	0	0	0	cellular carbohydrate biosynthetic process	0
GO:0034641	0.2948	15792	3964	626	137	4	cellular nitrogen compound metabolic process	0
GO:0034645	0.1989	15792	1000	226	110	45	cellular macromolecule biosynthetic process	0
GO:0034654	0.1136	8988	156	2	0	0	nucleobase-containing compound biosynthetic process	0
GO:0034655	0.0555	312	0	0	0	0	nucleobase-containing compound catabolic process	0
GO:0034660	0.1564	763	82	9	1	1	ncRNA metabolic process	0
GO:0035383	0.0412	7	0	0	0	0	thioester metabolic process	0
GO:0035435	0.5254	2	0	0	0	0	phosphate ion transmembrane transport	0
GO:0035639	0.2193	10468	718	228	82	10	purine ribonucleoside triphosphate binding	0
GO:0036094	0.2339	15792	881	319	97	13	small molecule binding	0
GO:0036442	0.0816	18	2	0	0	0	hydrogen-exporting ATPase activity	0
GO:0040011	0.1632	442	98	30	2	0	locomotion	0
GO:0042086	0.4892	74	2	0	0	0	5-methyl-5,6,7,8-tetrahydromethanopterin-dependent methyltransferase activity	0
GO:0042120	0.0467	20	0	0	0	0	alginic acid metabolic process	0
GO:0042122	0.1197	25	0	0	0	0	alginic acid catabolic process	0
GO:0042126	0.2638	19	2	1	0	0	nitrate metabolic process	0
GO:0042168	0.1023	34	3	1	0	0	heme metabolic process	0
GO:0042221	0.068	303	32	3	0	0	response to chemical	0
GO:0042254	0.065	43	0	0	0	0	ribosome biogenesis	0
GO:0042278	0.0771	661	16	6	4	3	purine nucleoside metabolic process	0
GO:0042330	0.07	187	7	2	0	0	taxis	0
GO:0042364	0.2479	336	93	47	25	15	water-soluble vitamin biosynthetic process	0
GO:0042398	0.0607	29	6	4	1	1	cellular modified amino acid biosynthetic process	0
GO:0042401	0.1655	31	5	3	0	0	cellular biogenic amine biosynthetic process	0
GO:0042430	0.1527	29	5	3	0	0	indole-containing compound metabolic process	0
GO:0042435	0.3052	27	5	3	0	0	indole-containing compound biosynthetic process	0
GO:0042439	0.2028	22	0	0	0	0	ethanolamine-containing compound metabolic process	0
GO:0042440	0.0393	18	1	0	0	0	pigment metabolic process	0
GO:0042451	0.1174	112	26	14	7	2	purine nucleoside biosynthetic process	0
GO:0042454	0.0626	143	0	0	0	0	ribonucleoside catabolic process	0
GO:0042455	0.1439	272	58	22	5	3	ribonucleoside biosynthetic process	0
GO:0042546	0.1886	72	0	0	0	0	cell wall biogenesis	0
GO:0042597	0.0579	174	17	8	3	2	periplasmic space	0
GO:0042623	0.1319	288	75	40	17	0	ATPase activity, coupled	0
GO:0042625	0.2189	150	43	29	16	3	ATPase activity, coupled to transmembrane movement of ions	0
GO:0042626	0.1543	223	60	34	18	0	ATPase activity, coupled to transmembrane movement of substances	0
GO:0042651	0.1135	147	42	24	10	0	thylakoid membrane	0
GO:0042710	0.0508	5	0	0	0	0	biofilm formation	0
GO:0042723	0.0272	11	3	2	1	1	thiamine-containing compound metabolic process	0
GO:0042724	0.0228	9	1	1	0	0	thiamine-containing compound biosynthetic process	0
GO:0042726	0.2863	38	14	9	4	2	flavin-containing compound metabolic process	0
GO:0042727	0.2863	38	14	9	4	2	flavin-containing compound biosynthetic process	0
GO:0042773	0.1028	15	0	0	0	0	ATP synthesis coupled electron transport	0
GO:0042777	0.2655	87	28	17	7	0	plasma membrane ATP synthesis coupled proton transport	0
GO:0042822	0.011	26	6	4	3	2	pyridoxal phosphate metabolic process	0
GO:0042823	0.011	26	6	4	3	2	pyridoxal phosphate biosynthetic process	0
GO:0042886	0.0191	10	2	1	0	0	amide transport	0
GO:0042995	0.1401	530	31	1	0	0	cell projection	0
GO:0043038	0.2969	196	45	11	1	1	amino acid activation	0
GO:0043039	0.2969	196	45	11	1	1	tRNA aminoacylation	0
GO:0043086	0.0537	18	0	0	0	0	negative regulation of catalytic activity	0
GO:0043163	0.1668	66	0	0	0	0	cell envelope organization	0
GO:0043165	0.1668	66	0	0	0	0	Gram-negative-bacterium-type cell outer membrane assembly	0
GO:0043167	0.2877	15792	2624	510	159	14	ion binding	0
GO:0043168	0.2342	15792	865	305	122	12	anion binding	0
GO:0043169	0.126	10860	108	9	1	1	cation binding	0
GO:0043170	0.3285	15792	7185	916	292	40	macromolecule metabolic process	0
GO:0043225	0.0823	31	10	6	4	3	anion transmembrane-transporting ATPase activity	0
GO:0043226	0.2302	2022	401	149	77	24	organelle	0
GO:0043228	0.2471	2063	389	149	78	24	non-membrane-bounded organelle	0
GO:0043229	0.2312	1995	391	149	78	24	intracellular organelle	0
GO:0043232	0.2471	2063	389	149	78	24	intracellular non-membrane-bounded organelle	0
GO:0043234	0.0785	373	73	40	24	8	protein complex	0
GO:0043412	0.0573	623	0	0	0	0	macromolecule modification	0
GO:0043414	0.0408	18	1	0	0	0	macromolecule methylation	0
GO:0043419	0.7255	30	10	4	1	1	urea catabolic process	0
GO:0043436	0.1998	2412	337	108	28	14	oxoacid metabolic process	0
GO:0043446	0.4856	207	67	34	5	0	cellular alkane metabolic process	0
GO:0043447	0.4856	207	67	34	5	0	alkane biosynthetic process	0
GO:0043492	0.1543	223	60	34	18	0	ATPase activity, coupled to movement of substances	0
GO:0043545	0.1798	41	1	0	0	0	molybdopterin cofactor metabolic process	0
GO:0043565	0.0304	39	0	0	0	0	sequence-specific DNA binding	0
GO:0043570	0.047	31	13	10	8	6	maintenance of DNA repeat elements	0
GO:0043571	0.047	31	13	10	8	6	maintenance of CRISPR repeat elements	0
GO:0043603	0.0994	71	22	13	3	1	cellular amide metabolic process	0
GO:0043604	0.0539	33	7	5	2	2	amide biosynthetic process	0
GO:0043605	0.2775	29	9	4	1	1	cellular amide catabolic process	0
GO:0043623	0.0241	20	0	0	0	0	cellular protein complex assembly	0
GO:0043900	0.0708	5	0	0	0	0	regulation of multi-organism process	0
GO:0043933	0.0195	16	0	0	0	0	macromolecular complex subunit organization	0
GO:0044036	0.0495	94	0	0	0	0	cell wall macromolecule metabolic process	0
GO:0044038	0.214	72	0	0	0	0	cell wall macromolecule biosynthetic process	0
GO:0044085	0.0859	660	3	0	0	0	cellular component biogenesis	0
GO:0044087	0.0206	16	2	1	0	0	regulation of cellular component biogenesis	0
GO:0044091	0.1668	66	0	0	0	0	membrane biogenesis	0
GO:0044092	0.0521	15	0	0	0	0	negative regulation of molecular function	0
GO:0044106	0.1297	94	10	5	1	0	cellular amine metabolic process	0
GO:0044205	0.1796	3	0	0	0	0	'de novo' UMP biosynthetic process	0
GO:0044237	0.4544	15792	15792	3168	846	206	cellular metabolic process	0
GO:0044238	0.4402	15792	15792	2619	624	157	primary metabolic process	0
GO:0044247	0.1213	20	0	0	0	0	cellular polysaccharide catabolic process	0
GO:0044248	0.0654	465	0	0	0	0	cellular catabolic process	0
GO:0044249	0.2956	15792	3103	783	289	65	cellular biosynthetic process	0
GO:0044255	0.0584	247	23	3	0	0	cellular lipid metabolic process	0
GO:0044260	0.2987	15792	4269	778	264	36	cellular macromolecule metabolic process	0
GO:0044262	0.0265	7	0	0	0	0	cellular carbohydrate metabolic process	0
GO:0044267	0.2235	2917	483	199	104	39	cellular protein metabolic process	0
GO:0044270	0.0595	381	0	0	0	0	cellular nitrogen compound catabolic process	0
GO:0044271	0.1503	15792	393	118	30	1	cellular nitrogen compound biosynthetic process	0
GO:0044272	0.037	50	0	0	0	0	sulfur compound biosynthetic process	0
GO:0044275	0.0708	3	0	0	0	0	cellular carbohydrate catabolic process	0
GO:0044281	0.2788	13094	1205	358	116	42	small molecule metabolic process	0
GO:0044282	0.0705	115	6	3	1	1	small molecule catabolic process	0
GO:0044283	0.232	1770	310	131	67	26	small molecule biosynthetic process	0
GO:0044391	0.2169	126	0	0	0	0	ribosomal subunit	0
GO:0044403	0.0892	175	23	1	0	0	symbiosis, encompassing mutualism through parasitism	0
GO:0044409	0.2071	19	2	0	0	0	entry into host	0
GO:0044419	0.0892	175	23	1	0	0	interspecies interaction between organisms	0
GO:0044422	0.1456	510	115	0	0	0	organelle part	0
GO:0044423	0.2349	244	101	55	38	12	virion part	0
GO:0044424	0.3026	14434	1623	603	250	34	intracellular part	0
GO:0044425	0.1848	15792	934	47	22	13	membrane part	0
GO:0044427	0.3404	199	70	41	31	11	chromosomal part	0
GO:0044436	0.1416	181	53	32	20	13	thylakoid part	0
GO:0044444	0.2284	1178	252	112	61	34	cytoplasmic part	0
GO:0044445	0.2344	23	6	4	1	1	cytosolic part	0
GO:0044446	0.1398	332	58	0	0	0	intracellular organelle part	0
GO:0044461	0.1747	190	42	1	0	0	bacterial-type flagellum part	0
GO:0044462	0.0644	418	18	7	3	1	external encapsulating structure part	0
GO:0044463	0.1747	190	42	1	0	0	cell projection part	0
GO:0044464	0.3407	15792	5009	1411	334	37	cell part	0
GO:0044699	0.4299	15792	15792	2629	557	43	single-organism process	0
GO:0044700	0.0297	52	0	0	0	0	single organism signaling	0
GO:0044710	0.3488	15792	4971	1245	323	38	single-organism metabolic process	0
GO:0044711	0.2563	6886	929	375	113	40	single-organism biosynthetic process	0
GO:0044712	0.0754	508	0	0	0	0	single-organism catabolic process	0
GO:0044723	0.0674	304	23	4	0	0	single-organism carbohydrate metabolic process	0
GO:0044724	0.0709	32	1	0	0	0	single-organism carbohydrate catabolic process	0
GO:0044763	0.348	15792	6515	1048	307	36	single-organism cellular process	0
GO:0044764	0.1015	287	49	0	0	0	multi-organism cellular process	0
GO:0044765	0.1351	5491	301	106	25	15	single-organism transport	0
GO:0044767	0.0405	92	0	0	0	0	single-organism developmental process	0
GO:0044769	0.1995	83	28	17	7	0	ATPase activity, coupled to transmembrane movement of ions, rotational mechanism	0
GO:0044780	0.0547	3	0	0	0	0	bacterial-type flagellum assembly	0
GO:0044781	0.0667	124	0	0	0	0	bacterial-type flagellum organization	0
GO:0044802	0.1048	56	0	0	0	0	single-organism membrane organization	0
GO:0045135	0.1197	25	0	0	0	0	poly(beta-D-mannuronate) lyase activity	0
GO:0045156	0.1376	42	0	0	0	0	electron transporter, transferring electrons within the cyclic electron transport pathway of photosynthesis activity	0
GO:0045184	0.0698	642	36	1	0	0	establishment of protein localization	0
GO:0045226	0.0832	17	1	0	0	0	extracellular polysaccharide biosynthetic process	0
GO:0045227	0.4129	21	4	1	0	0	capsule polysaccharide biosynthetic process	0
GO:0045229	0.0534	73	0	0	0	0	external encapsulating structure organization	0
GO:0045230	0.4129	21	4	1	0	0	capsule organization	0
GO:0045259	0.038	52	18	11	6	4	proton-transporting ATP synthase complex	0
GO:0045261	0.2136	28	9	5	1	0	proton-transporting ATP synthase complex, catalytic core F(1)	0
GO:0045333	0.1096	213	66	34	5	0	cellular respiration	0
GO:0045893	0.0369	16	6	4	2	1	positive regulation of transcription, DNA-templated	0
GO:0045935	0.0369	16	6	4	2	1	positive regulation of nucleobase-containing compound metabolic process	0
GO:0046034	0.0794	257	9	1	0	0	ATP metabolic process	0
GO:0046039	0.0558	12	0	0	0	0	GTP metabolic process	0
GO:0046040	0.0992	24	2	1	0	0	IMP metabolic process	0
GO:0046049	0.0816	2	0	0	0	0	UMP metabolic process	0
GO:0046116	0.1112	17	0	0	0	0	queuosine metabolic process	0
GO:0046128	0.0768	660	16	6	4	3	purine ribonucleoside metabolic process	0
GO:0046129	0.1174	112	26	14	7	2	purine ribonucleoside biosynthetic process	0
GO:0046130	0.0613	130	0	0	0	0	purine ribonucleoside catabolic process	0
GO:0046131	0.1064	45	0	0	0	0	pyrimidine ribonucleoside metabolic process	0
GO:0046132	0.1753	45	2	0	0	0	pyrimidine ribonucleoside biosynthetic process	0
GO:0046134	0.1753	45	2	0	0	0	pyrimidine nucleoside biosynthetic process	0
GO:0046148	0.0473	17	1	0	0	0	pigment biosynthetic process	0
GO:0046164	0.0481	1	0	0	0	0	alcohol catabolic process	0
GO:0046219	0.3052	27	5	3	0	0	indolalkylamine biosynthetic process	0
GO:0046336	0.0791	2	0	0	0	0	ethanolamine catabolic process	0
GO:0046365	0.0512	39	4	1	0	0	monosaccharide catabolic process	0
GO:0046379	0.0832	17	1	0	0	0	extracellular polysaccharide metabolic process	0
GO:0046390	0.1741	350	70	33	8	3	ribose phosphate biosynthetic process	0
GO:0046394	0.1878	1053	170	73	28	15	carboxylic acid biosynthetic process	0
GO:0046395	0.0871	43	0	0	0	0	carboxylic acid catabolic process	0
GO:0046405	0.5502	28	9	5	3	3	glycerol dehydratase activity	0
GO:0046434	0.0715	274	0	0	0	0	organophosphate catabolic process	0
GO:0046467	0.1255	44	10	3	0	0	membrane lipid biosynthetic process	0
GO:0046483	0.2948	15792	3996	624	143	4	heterocycle metabolic process	0
GO:0046490	0.3496	30	8	3	0	0	isopentenyl diphosphate metabolic process	0
GO:0046493	0.1658	45	10	3	0	0	lipid A metabolic process	0
GO:0046496	0.1082	70	18	1	0	0	nicotinamide nucleotide metabolic process	0
GO:0046501	0.2391	28	1	0	0	0	protoporphyrinogen IX metabolic process	0
GO:0046689	0.1157	59	15	9	6	4	response to mercury ion	0
GO:0046700	0.056	305	0	0	0	0	heterocycle catabolic process	0
GO:0046872	0.1251	10612	108	13	1	1	metal ion binding	0
GO:0046873	0.0262	49	10	6	4	3	metal ion transmembrane transporter activity	0
GO:0046903	0.0419	304	0	0	0	0	secretion	0
GO:0046906	0.0672	350	54	26	2	1	tetrapyrrole binding	0
GO:0046914	0.0624	245	23	9	1	1	transition metal ion binding	0
GO:0046933	0.2126	80	28	17	7	0	proton-transporting ATP synthase activity, rotational mechanism	0
GO:0046942	0.0302	7	2	1	0	0	carboxylic acid transport	0
GO:0046961	0.0816	18	2	0	0	0	proton-transporting ATPase activity, rotational mechanism	0
GO:0046992	0.5232	58	18	9	1	0	oxidoreductase activity, acting on X-H and Y-H to form an X-Y bond	0
GO:0048037	0.0722	797	1	0	0	0	cofactor binding	0
GO:0048038	0.0723	59	12	0	0	0	quinone binding	0
GO:0048518	0.0178	12	4	1	0	0	positive regulation of biological process	0
GO:0048522	0.0225	12	4	1	0	0	positive regulation of cellular process	0
GO:0048856	0.0391	91	8	0	0	0	anatomical structure development	0
GO:0048869	0.0394	91	8	0	0	0	cellular developmental process	0
GO:0050136	0.1932	106	23	13	10	5	NADH dehydrogenase (quinone) activity	0
GO:0050485	0.5232	58	18	9	1	0	oxidoreductase activity, acting on X-H and Y-H to form an X-Y bond, with a disulfide as acceptor	0
GO:0050497	0.711	36	0	0	0	0	transferase activity, transferring alkylthio groups	0
GO:0050524	0.711	36	0	0	0	0	coenzyme-B sulfoethylthiotransferase activity	0
GO:0050787	0.1259	14	0	0	0	0	detoxification of mercury ion	0
GO:0050789	0.1132	12933	11	0	0	0	regulation of biological process	0
GO:0050790	0.0326	16	0	0	0	0	regulation of catalytic activity	0
GO:0050793	0.0886	64	6	0	0	0	regulation of developmental process	0
GO:0050794	0.1095	10319	9	0	0	0	regulation of cellular process	0
GO:0050896	0.0839	1969	32	0	0	0	response to stimulus	0
GO:0051002	0.1246	4	0	0	0	0	ligase activity, forming nitrogen-metal bonds	0
GO:0051003	0.1246	4	0	0	0	0	ligase activity, forming nitrogen-metal bonds, forming coordination complexes	0
GO:0051119	0.097	41	4	1	0	0	sugar transmembrane transporter activity	0
GO:0051128	0.0537	59	0	0	0	0	regulation of cellular component organization	0
GO:0051171	0.0855	4127	0	0	0	0	regulation of nitrogen compound metabolic process	0
GO:0051173	0.0369	16	6	4	2	1	positive regulation of nitrogen compound metabolic process	0
GO:0051179	0.1953	15792	957	208	46	17	localization	0
GO:0051183	0.22	51	13	8	1	1	vitamin transporter activity	0
GO:0051186	0.0955	640	46	12	3	1	cofactor metabolic process	0
GO:0051188	0.0996	435	45	19	9	2	cofactor biosynthetic process	0
GO:0051189	0.1626	39	1	0	0	0	prosthetic group metabolic process	0
GO:0051213	0.0151	5	0	0	0	0	dioxygenase activity	0
GO:0051234	0.1821	15792	766	137	30	10	establishment of localization	0
GO:0051246	0.0524	32	5	2	0	0	regulation of protein metabolic process	0
GO:0051252	0.0839	3692	0	0	0	0	regulation of RNA metabolic process	0
GO:0051254	0.0369	16	6	4	2	1	positive regulation of RNA metabolic process	0
GO:0051276	0.0529	37	12	10	7	6	chromosome organization	0
GO:0051301	0.0442	120	2	1	0	0	cell division	0
GO:0051302	0.1481	26	5	2	1	1	regulation of cell division	0
GO:0051536	0.0435	123	0	0	0	0	iron-sulfur cluster binding	0
GO:0051539	0.0434	27	1	0	0	0	4 iron, 4 sulfur cluster binding	0
GO:0051540	0.0434	123	0	0	0	0	metal cluster binding	0
GO:0051607	0.1215	62	33	22	13	9	defense response to virus	0
GO:0051641	0.0518	302	34	3	0	0	cellular localization	0
GO:0051649	0.0515	276	33	3	0	0	establishment of localization in cell	0
GO:0051674	0.1759	265	63	11	0	0	localization of cell	0
GO:0051701	0.0956	31	0	0	0	0	interaction with host	0
GO:0051704	0.1322	1603	208	89	26	6	multi-organism process	0
GO:0051707	0.0641	57	27	19	15	10	response to other organism	0
GO:0051716	0.0521	131	0	0	0	0	cellular response to stimulus	0
GO:0051726	0.2002	25	5	2	1	1	regulation of cell cycle	0
GO:0051806	0.2071	19	2	0	0	0	entry into cell of other organism involved in symbiotic interaction	0
GO:0051828	0.2071	19	2	0	0	0	entry into other organism involved in symbiotic interaction	0
GO:0052126	0.2071	19	2	0	0	0	movement in host environment	0
GO:0052192	0.2071	19	2	0	0	0	movement in environment of other organism involved in symbiotic interaction	0
GO:0052689	0.0543	35	7	1	0	0	carboxylic ester hydrolase activity	0
GO:0052803	0.3266	69	24	14	9	2	imidazole-containing compound metabolic process	0
GO:0055085	0.0625	466	32	10	0	0	transmembrane transport	0
GO:0055086	0.1329	2000	126	42	14	6	nucleobase-containing small molecule metabolic process	0
GO:0055114	0.143	6099	366	94	39	12	oxidation-reduction process	0
GO:0055129	0.5826	14	0	0	0	0	L-proline biosynthetic process	0
GO:0060089	0.0257	35	0	0	0	0	molecular transducer activity	0
GO:0060255	0.0883	5075	0	0	0	0	regulation of macromolecule metabolic process	0
GO:0060491	0.038	12	0	0	0	0	regulation of cell projection assembly	0
GO:0061024	0.0979	56	0	0	0	0	membrane organization	0
GO:0061505	0.1119	19	2	1	0	0	DNA topoisomerase II activity	0
GO:0065003	0.0203	21	0	0	0	0	macromolecular complex assembly	0
GO:0065007	0.1164	13861	11	0	0	0	biological regulation	0
GO:0065008	0.0394	94	4	1	0	0	regulation of biological quality	0
GO:0065009	0.031	9	0	0	0	0	regulation of molecular function	0
GO:0070011	0.0323	6	0	0	0	0	peptidase activity, acting on L-amino acid peptides	0
GO:0070035	0.0123	13	2	1	0	0	purine NTP-dependent helicase activity	0
GO:0070271	0.0206	21	0	0	0	0	protein complex biogenesis	0
GO:0070283	0.1043	19	7	5	3	3	radical SAM enzyme activity	0
GO:0070589	0.214	72	0	0	0	0	cellular component macromolecule biosynthetic process	0
GO:0070925	0.0429	1	0	0	0	0	organelle assembly	0
GO:0071103	0.0169	13	4	2	1	1	DNA conformation change	0
GO:0071554	0.0421	93	0	0	0	0	cell wall organization or biogenesis	0
GO:0071702	0.1088	1394	181	44	13	9	organic substance transport	0
GO:0071704	0.479	15792	15792	3835	840	221	organic substance metabolic process	0
GO:0071705	0.0252	49	7	4	3	3	nitrogen compound transport	0
GO:0071709	0.1668	66	0	0	0	0	membrane assembly	0
GO:0071822	0.0237	17	0	0	0	0	protein complex subunit organization	0
GO:0071840	0.0933	1533	0	0	0	0	cellular component organization or biogenesis	0
GO:0071941	0.2698	113	38	20	2	1	nitrogen cycle metabolic process	0
GO:0071944	0.1415	8002	74	0	0	0	cell periphery	0
GO:0072330	0.0454	33	11	7	2	2	monocarboxylic acid biosynthetic process	0
GO:0072348	0.0466	27	9	6	4	3	sulfur compound transport	0
GO:0072509	0.0504	9	0	0	0	0	divalent inorganic cation transmembrane transporter activity	0
GO:0072511	0.0345	4	0	0	0	0	divalent inorganic cation transport	0
GO:0072521	0.0881	839	13	8	4	3	purine-containing compound metabolic process	0
GO:0072522	0.1168	208	38	13	5	2	purine-containing compound biosynthetic process	0
GO:0072523	0.0569	136	0	0	0	0	purine-containing compound catabolic process	0
GO:0072524	0.1234	79	19	0	0	0	pyridine-containing compound metabolic process	0
GO:0072525	0.1469	57	12	3	0	0	pyridine-containing compound biosynthetic process	0
GO:0072527	0.0774	94	0	0	0	0	pyrimidine-containing compound metabolic process	0
GO:0072528	0.0827	75	0	0	0	0	pyrimidine-containing compound biosynthetic process	0
GO:0080090	0.0881	4291	0	0	0	0	regulation of primary metabolic process	0
GO:0080109	0.3363	22	0	0	0	0	indole-3-acetonitrile nitrile hydratase activity	0
GO:0090304	0.2095	15792	1237	108	1	1	nucleic acid metabolic process	0
GO:0090305	0.0395	46	17	8	6	3	nucleic acid phosphodiester bond hydrolysis	0
GO:0090407	0.1402	1019	135	45	20	5	organophosphate biosynthetic process	0
GO:0090482	0.2998	52	13	8	1	1	vitamin transmembrane transporter activity	0
GO:0090529	0.0132	9	1	0	0	0	cell septum assembly	0
GO:0097159	0.3792	15792	12050	1551	337	26	organic cyclic compound binding	0
GO:0097367	0.2119	12920	708	235	82	11	carbohydrate derivative binding	0
GO:0098542	0.0848	57	31	20	15	10	defense response to other organism	0
GO:1900190	0.1835	4	0	0	0	0	regulation of single-species biofilm formation	0
GO:1901068	0.043	16	0	0	0	0	guanosine-containing compound metabolic process	0
GO:1901069	0.0498	14	0	0	0	0	guanosine-containing compound catabolic process	0
GO:1901135	0.1368	2587	137	37	7	3	carbohydrate derivative metabolic process	0
GO:1901136	0.0604	217	0	0	0	0	carbohydrate derivative catabolic process	0
GO:1901137	0.1282	822	104	28	8	5	carbohydrate derivative biosynthetic process	0
GO:1901160	0.095	20	0	0	0	0	primary amino compound metabolic process	0
GO:1901161	0.0791	2	0	0	0	0	primary amino compound catabolic process	0
GO:1901264	0.1094	23	0	0	0	0	carbohydrate derivative transport	0
GO:1901265	0.225	15792	892	275	88	13	nucleoside phosphate binding	0
GO:1901269	0.1658	45	10	3	0	0	lipooligosaccharide metabolic process	0
GO:1901271	0.1658	45	10	3	0	0	lipooligosaccharide biosynthetic process	0
GO:1901292	0.0515	107	0	0	0	0	nucleoside phosphate catabolic process	0
GO:1901293	0.1348	495	95	30	18	6	nucleoside phosphate biosynthetic process	0
GO:1901360	0.2996	15792	4192	686	145	4	organic cyclic compound metabolic process	0
GO:1901361	0.0556	307	0	0	0	0	organic cyclic compound catabolic process	0
GO:1901362	0.1616	15792	549	155	53	3	organic cyclic compound biosynthetic process	0
GO:1901363	0.3788	15792	11951	1543	337	26	heterocyclic compound binding	0
GO:1901476	0.1825	131	36	7	0	0	carbohydrate transporter activity	0
GO:1901564	0.275	11619	1107	388	111	27	organonitrogen compound metabolic process	0
GO:1901565	0.0716	294	0	0	0	0	organonitrogen compound catabolic process	0
GO:1901566	0.286	3259	624	287	104	48	organonitrogen compound biosynthetic process	0
GO:1901575	0.0938	1128	20	1	0	0	organic substance catabolic process	0
GO:1901576	0.2979	15792	3159	805	291	67	organic substance biosynthetic process	0
GO:1901605	0.2019	941	133	63	30	15	alpha-amino acid metabolic process	0
GO:1901606	0.0547	44	0	0	0	0	alpha-amino acid catabolic process	0
GO:1901607	0.2625	705	127	63	28	15	alpha-amino acid biosynthetic process	0
GO:1901615	0.0635	9	0	0	0	0	organic hydroxy compound metabolic process	0
GO:1901616	0.0481	1	0	0	0	0	organic hydroxy compound catabolic process	0
GO:1901657	0.0932	842	32	9	5	4	glycosyl compound metabolic process	0
GO:1901658	0.06	139	0	0	0	0	glycosyl compound catabolic process	0
GO:1901659	0.1386	268	58	22	6	3	glycosyl compound biosynthetic process	0
GO:1901677	0.2351	32	10	3	0	0	phosphate transmembrane transporter activity	0
GO:1901682	0.2053	32	10	6	4	2	sulfur compound transmembrane transporter activity	0
GO:1902115	0.038	12	0	0	0	0	regulation of organelle assembly	0
GO:1902208	0.038	12	0	0	0	0	regulation of bacterial-type flagellum assembly	0
GO:1902494	0.0219	16	2	1	0	0	catalytic complex	0
GO:1902589	0.0568	38	12	10	7	6	single-organism organelle organization	0
GO:1990204	0.1195	36	1	0	0	0	oxidoreductase complex	0
GO:2000112	0.0843	3851	0	0	0	0	regulation of cellular macromolecule biosynthetic process	0
GO:2001057	0.2638	19	2	1	0	0	reactive nitrogen species metabolic process	0
GO:2001141	0.0829	3660	0	0	0	0	regulation of RNA biosynthetic process	0

## Sheet: MPP-I__known_predictions
		# of gene families for which a GO term is predicted at Precision≥X%
GO term	AUPRC	0.1	0.3	0.5	0.7	0.9	Description	Highlighted in paper
GO:0003954	0.3925	13	13	12	11	9	NADH dehydrogenase activity	1
GO:0004812	0.262	20	19	15	14	10	aminoacyl-tRNA ligase activity	1		total COG/NOG gene families analyzed in MPP-I
GO:0006520	0.3159	175	104	85	53	24	cellular amino acid metabolic process	1		3536
GO:0051540	0.1489	85	27	16	3	1	metal cluster binding	1
GO:0000049	0.1631	11	1	0	0	0	tRNA binding	0
GO:0000104	0.1376	2	2	2	2	2	succinate dehydrogenase activity	0
GO:0000105	0.27	7	5	5	3	3	histidine biosynthetic process	0
GO:0000107	0.2062	2	0	0	0	0	imidazoleglycerol-phosphate synthase activity	0
GO:0000155	0.0376	16	7	2	2	2	phosphorelay sensor kinase activity	0
GO:0000156	0.0241	9	2	0	0	0	phosphorelay response regulator activity	0
GO:0000160	0.0574	32	24	8	4	1	phosphorelay signal transduction system	0
GO:0000162	0.1815	2	0	0	0	0	tryptophan biosynthetic process	0
GO:0000166	0.2589	582	321	151	75	19	nucleotide binding	0
GO:0000255	0.0914	1	0	0	0	0	allantoin metabolic process	0
GO:0000256	0.1073	1	0	0	0	0	allantoin catabolic process	0
GO:0000270	0.127	10	8	8	7	2	peptidoglycan metabolic process	0
GO:0000271	0.0689	17	10	1	1	1	polysaccharide biosynthetic process	0
GO:0000287	0.0597	14	0	0	0	0	magnesium ion binding	0
GO:0000413	0.033	2	1	1	0	0	protein peptidyl-prolyl isomerization	0
GO:0000502	0.2185	2	1	0	0	0	proteasome complex	0
GO:0000902	0.2292	12	8	8	8	3	cell morphogenesis	0
GO:0000910	0.0181	1	1	1	0	0	cytokinesis	0
GO:0000917	0.0256	1	1	1	0	0	barrier septum assembly	0
GO:0001071	0.0309	18	13	11	6	4	nucleic acid binding transcription factor activity	0
GO:0001514	0.1156	2	2	2	0	0	selenocysteine incorporation	0
GO:0001539	0.3951	22	20	19	11	0	ciliary or bacterial-type flagellar motility	0
GO:0001882	0.2448	462	246	123	70	17	nucleoside binding	0
GO:0001883	0.2419	456	241	122	63	19	purine nucleoside binding	0
GO:0002161	0.2326	3	3	3	1	0	aminoacyl-tRNA editing activity	0
GO:0002252	0.3292	9	8	8	8	5	immune effector process	0
GO:0002376	0.3046	9	8	8	8	5	immune system process	0
GO:0003333	0.0575	1	0	0	0	0	amino acid transmembrane transport	0
GO:0003676	0.1934	474	311	183	82	16	nucleic acid binding	0
GO:0003677	0.1174	278	127	70	5	4	DNA binding	0
GO:0003678	0.0571	2	0	0	0	0	DNA helicase activity	0
GO:0003697	0.0225	1	0	0	0	0	single-stranded DNA binding	0
GO:0003700	0.0302	18	13	11	6	4	sequence-specific DNA binding transcription factor activity	0
GO:0003723	0.2262	103	68	44	34	17	RNA binding	0
GO:0003735	0.2544	55	52	52	50	45	structural constituent of ribosome	0
GO:0003755	0.033	2	1	1	0	0	peptidyl-prolyl cis-trans isomerase activity	0
GO:0003774	0.3372	14	14	11	2	0	motor activity	0
GO:0003824	0.7083	2274	2274	2274	2136	813	catalytic activity	0
GO:0003899	0.0548	2	2	1	0	0	DNA-directed RNA polymerase activity	0
GO:0003916	0.129	5	1	0	0	0	DNA topoisomerase activity	0
GO:0003918	0.2769	4	3	0	0	0	DNA topoisomerase type II (ATP-hydrolyzing) activity	0
GO:0003924	0.0705	4	0	0	0	0	GTPase activity	0
GO:0003989	0.0555	2	2	2	2	2	acetyl-CoA carboxylase activity	0
GO:0004129	0.1503	5	3	3	2	1	cytochrome-c oxidase activity	0
GO:0004175	0.0186	2	0	0	0	0	endopeptidase activity	0
GO:0004333	0.0868	1	1	1	1	1	fumarate hydratase activity	0
GO:0004371	0.1106	1	0	0	0	0	glycerone kinase activity	0
GO:0004375	0.1578	2	2	2	2	2	glycine dehydrogenase (decarboxylating) activity	0
GO:0004386	0.0801	11	5	1	0	0	helicase activity	0
GO:0004497	0.0095	1	1	1	1	1	monooxygenase activity	0
GO:0004518	0.0684	62	3	3	0	0	nuclease activity	0
GO:0004527	0.0451	9	0	0	0	0	exonuclease activity	0
GO:0004540	0.0598	4	3	3	3	2	ribonuclease activity	0
GO:0004553	0.1142	34	22	15	0	0	hydrolase activity, hydrolyzing O-glycosyl compounds	0
GO:0004672	0.0366	20	6	2	2	2	protein kinase activity	0
GO:0004673	0.0373	16	7	2	2	2	protein histidine kinase activity	0
GO:0004733	0.0129	1	1	1	0	0	pyridoxamine-phosphate oxidase activity	0
GO:0004774	0.164	2	2	2	2	2	succinate-CoA ligase activity	0
GO:0004775	0.164	2	2	2	2	2	succinate-CoA ligase (ADP-forming) activity	0
GO:0004803	0.0893	10	10	10	2	2	transposase activity	0
GO:0004854	0.0827	1	1	1	1	1	xanthine dehydrogenase activity	0
GO:0004871	0.0637	38	30	28	12	6	signal transducer activity	0
GO:0004872	0.0455	21	15	3	3	2	receptor activity	0
GO:0005198	0.2428	65	62	60	56	45	structural molecule activity	0
GO:0005215	0.1591	278	168	96	30	15	transporter activity	0
GO:0005310	0.1227	2	0	0	0	0	dicarboxylic acid transmembrane transporter activity	0
GO:0005315	0.4547	3	3	3	1	1	inorganic phosphate transmembrane transporter activity	0
GO:0005342	0.0862	8	1	0	0	0	organic acid transmembrane transporter activity	0
GO:0005351	0.1732	10	8	8	1	1	sugar:hydrogen symporter activity	0
GO:0005381	0.1239	2	2	2	1	1	iron ion transmembrane transporter activity	0
GO:0005402	0.1732	10	8	8	1	1	cation:sugar symporter activity	0
GO:0005488	0.4812	1469	1469	1169	529	139	binding	0
GO:0005506	0.0599	22	4	0	0	0	iron ion binding	0
GO:0005507	0.062	3	2	0	0	0	copper ion binding	0
GO:0005515	0.0201	1	0	0	0	0	protein binding	0
GO:0005524	0.2163	417	189	95	25	15	ATP binding	0
GO:0005525	0.0589	8	0	0	0	0	GTP binding	0
GO:0005618	0.0264	3	3	2	0	0	cell wall	0
GO:0005622	0.3095	546	385	269	161	77	intracellular	0
GO:0005623	0.3453	867	804	469	205	105	cell	0
GO:0005694	0.122	17	0	0	0	0	chromosome	0
GO:0005737	0.3221	455	303	219	126	58	cytoplasm	0
GO:0005840	0.2314	58	55	53	51	46	ribosome	0
GO:0005886	0.1332	225	90	37	5	0	plasma membrane	0
GO:0005975	0.168	161	83	48	32	0	carbohydrate metabolic process	0
GO:0005976	0.0594	19	9	1	1	1	polysaccharide metabolic process	0
GO:0005977	0.1125	2	0	0	0	0	glycogen metabolic process	0
GO:0005978	0.3081	3	0	0	0	0	glycogen biosynthetic process	0
GO:0005984	0.155	2	2	2	1	1	disaccharide metabolic process	0
GO:0005991	0.1953	2	2	2	1	1	trehalose metabolic process	0
GO:0005992	0.0899	2	2	0	0	0	trehalose biosynthetic process	0
GO:0005996	0.0934	24	0	0	0	0	monosaccharide metabolic process	0
GO:0006004	0.303	1	0	0	0	0	fucose metabolic process	0
GO:0006006	0.0659	8	1	0	0	0	glucose metabolic process	0
GO:0006007	0.0613	5	1	1	0	0	glucose catabolic process	0
GO:0006022	0.1196	10	8	8	7	2	aminoglycan metabolic process	0
GO:0006023	0.4514	10	8	8	8	2	aminoglycan biosynthetic process	0
GO:0006024	0.4514	10	8	8	8	2	glycosaminoglycan biosynthetic process	0
GO:0006063	0.123	2	0	0	0	0	uronic acid metabolic process	0
GO:0006064	0.123	2	0	0	0	0	glucuronate catabolic process	0
GO:0006073	0.1184	2	0	0	0	0	cellular glucan metabolic process	0
GO:0006081	0.2736	6	5	5	5	4	cellular aldehyde metabolic process	0
GO:0006082	0.2903	258	139	106	75	35	organic acid metabolic process	0
GO:0006084	0.1311	2	1	1	1	1	acetyl-CoA metabolic process	0
GO:0006090	0.4281	6	5	5	5	4	pyruvate metabolic process	0
GO:0006091	0.1191	37	12	8	2	0	generation of precursor metabolites and energy	0
GO:0006096	0.101	1	0	0	0	0	glycolysis	0
GO:0006098	0.0254	1	1	0	0	0	pentose-phosphate shunt	0
GO:0006099	0.0836	4	1	0	0	0	tricarboxylic acid cycle	0
GO:0006105	0.4524	3	1	1	0	0	succinate metabolic process	0
GO:0006112	0.1125	2	0	0	0	0	energy reserve metabolic process	0
GO:0006119	0.2317	6	4	1	0	0	oxidative phosphorylation	0
GO:0006139	0.2662	698	534	299	119	15	nucleobase-containing compound metabolic process	0
GO:0006144	0.0897	3	0	0	0	0	purine nucleobase metabolic process	0
GO:0006152	0.0823	38	2	2	2	2	purine nucleoside catabolic process	0
GO:0006163	0.127	94	25	5	3	2	purine nucleotide metabolic process	0
GO:0006164	0.1854	35	17	14	8	6	purine nucleotide biosynthetic process	0
GO:0006184	0.0635	4	0	0	0	0	GTP catabolic process	0
GO:0006188	0.3469	9	5	4	3	2	IMP biosynthetic process	0
GO:0006189	0.3713	9	5	4	3	2	'de novo' IMP biosynthetic process	0
GO:0006195	0.0802	39	2	2	2	2	purine nucleotide catabolic process	0
GO:0006200	0.0699	25	2	2	2	2	ATP catabolic process	0
GO:0006206	0.0268	1	0	0	0	0	pyrimidine nucleobase metabolic process	0
GO:0006207	0.0468	1	1	0	0	0	'de novo' pyrimidine nucleobase biosynthetic process	0
GO:0006213	0.1012	4	2	0	0	0	pyrimidine nucleoside metabolic process	0
GO:0006220	0.1585	5	4	4	1	1	pyrimidine nucleotide metabolic process	0
GO:0006221	0.1437	5	4	3	0	0	pyrimidine nucleotide biosynthetic process	0
GO:0006222	0.1593	4	4	1	1	1	UMP biosynthetic process	0
GO:0006259	0.1347	143	79	48	14	8	DNA metabolic process	0
GO:0006260	0.0853	26	8	2	0	0	DNA replication	0
GO:0006261	0.0397	4	0	0	0	0	DNA-dependent DNA replication	0
GO:0006265	0.1291	5	1	0	0	0	DNA topological change	0
GO:0006268	0.2951	2	0	0	0	0	DNA unwinding involved in DNA replication	0
GO:0006281	0.087	17	7	7	0	0	DNA repair	0
GO:0006289	0.1217	3	0	0	0	0	nucleotide-excision repair	0
GO:0006304	0.0792	9	7	3	3	3	DNA modification	0
GO:0006305	0.0925	5	0	0	0	0	DNA alkylation	0
GO:0006306	0.0925	5	0	0	0	0	DNA methylation	0
GO:0006310	0.0624	20	11	11	2	2	DNA recombination	0
GO:0006313	0.0936	13	11	10	2	2	transposition, DNA-mediated	0
GO:0006351	0.059	87	38	13	5	1	transcription, DNA-templated	0
GO:0006354	0.0452	1	0	0	0	0	DNA-templated transcription, elongation	0
GO:0006355	0.0572	81	39	13	5	1	regulation of transcription, DNA-templated	0
GO:0006364	0.1024	6	0	0	0	0	rRNA processing	0
GO:0006396	0.1612	43	17	3	0	0	RNA processing	0
GO:0006399	0.2785	53	28	22	16	6	tRNA metabolic process	0
GO:0006400	0.1025	16	1	1	0	0	tRNA modification	0
GO:0006401	0.0362	1	0	0	0	0	RNA catabolic process	0
GO:0006412	0.2891	103	87	78	72	61	translation	0
GO:0006414	0.0922	3	3	3	1	0	translational elongation	0
GO:0006417	0.1022	4	3	3	1	0	regulation of translation	0
GO:0006418	0.5388	20	19	15	14	10	tRNA aminoacylation for protein translation	0
GO:0006448	0.1507	3	3	3	1	0	regulation of translational elongation	0
GO:0006450	0.1507	3	3	3	1	0	regulation of translational fidelity	0
GO:0006451	0.1156	2	2	2	0	0	translational readthrough	0
GO:0006457	0.0711	3	0	0	0	0	protein folding	0
GO:0006464	0.0263	1	0	0	0	0	cellular protein modification process	0
GO:0006468	0.0127	1	0	0	0	0	protein phosphorylation	0
GO:0006508	0.0525	17	0	0	0	0	proteolysis	0
GO:0006525	0.129	6	2	2	2	2	arginine metabolic process	0
GO:0006526	0.2125	5	2	2	2	2	arginine biosynthetic process	0
GO:0006527	0.231	3	1	1	0	0	arginine catabolic process	0
GO:0006536	0.1379	4	1	1	1	1	glutamate metabolic process	0
GO:0006537	0.2579	2	2	1	1	1	glutamate biosynthetic process	0
GO:0006541	0.0507	2	0	0	0	0	glutamine metabolic process	0
GO:0006544	0.0263	2	2	2	2	2	glycine metabolic process	0
GO:0006546	0.04	2	2	2	2	2	glycine catabolic process	0
GO:0006547	0.2085	8	5	5	3	3	histidine metabolic process	0
GO:0006548	0.3881	2	1	0	0	0	histidine catabolic process	0
GO:0006549	0.2269	2	0	0	0	0	isoleucine metabolic process	0
GO:0006551	0.1413	1	0	0	0	0	leucine metabolic process	0
GO:0006553	0.0601	1	0	0	0	0	lysine metabolic process	0
GO:0006560	0.4478	3	3	3	1	1	proline metabolic process	0
GO:0006561	0.548	3	3	3	1	1	proline biosynthetic process	0
GO:0006566	0.1379	2	0	0	0	0	threonine metabolic process	0
GO:0006568	0.1224	2	0	0	0	0	tryptophan metabolic process	0
GO:0006569	0.0293	1	0	0	0	0	tryptophan catabolic process	0
GO:0006576	0.0884	3	0	0	0	0	cellular biogenic amine metabolic process	0
GO:0006580	0.127	3	0	0	0	0	ethanolamine metabolic process	0
GO:0006586	0.1224	2	0	0	0	0	indolalkylamine metabolic process	0
GO:0006629	0.0787	33	15	13	1	0	lipid metabolic process	0
GO:0006631	0.0156	2	2	2	2	2	fatty acid metabolic process	0
GO:0006633	0.0172	2	2	2	2	2	fatty acid biosynthetic process	0
GO:0006637	0.1082	2	1	1	1	1	acyl-CoA metabolic process	0
GO:0006643	0.0747	5	2	0	0	0	membrane lipid metabolic process	0
GO:0006644	0.1271	13	6	6	2	1	phospholipid metabolic process	0
GO:0006664	0.0896	5	2	0	0	0	glycolipid metabolic process	0
GO:0006720	0.1623	9	5	5	4	4	isoprenoid metabolic process	0
GO:0006721	0.1885	7	5	5	4	4	terpenoid metabolic process	0
GO:0006725	0.3108	832	700	388	209	22	cellular aromatic compound metabolic process	0
GO:0006732	0.1202	61	14	4	0	0	coenzyme metabolic process	0
GO:0006733	0.0544	2	0	0	0	0	oxidoreduction coenzyme metabolic process	0
GO:0006739	0.0249	1	0	0	0	0	NADP metabolic process	0
GO:0006740	0.0242	1	1	0	0	0	NADPH regeneration	0
GO:0006753	0.1608	179	68	23	17	10	nucleoside phosphate metabolic process	0
GO:0006754	0.2689	13	13	9	7	7	ATP biosynthetic process	0
GO:0006766	0.2691	38	26	22	20	19	vitamin metabolic process	0
GO:0006767	0.2691	38	26	22	20	19	water-soluble vitamin metabolic process	0
GO:0006771	0.2531	4	4	4	3	2	riboflavin metabolic process	0
GO:0006772	0.0605	3	1	0	0	0	thiamine metabolic process	0
GO:0006777	0.1271	5	4	3	3	3	Mo-molybdopterin cofactor biosynthetic process	0
GO:0006778	0.1162	6	6	3	3	3	porphyrin-containing compound metabolic process	0
GO:0006779	0.1189	6	6	3	3	3	porphyrin-containing compound biosynthetic process	0
GO:0006782	0.2195	2	1	1	0	0	protoporphyrinogen IX biosynthetic process	0
GO:0006783	0.2334	5	4	1	0	0	heme biosynthetic process	0
GO:0006793	0.2045	453	196	69	29	13	phosphorus metabolic process	0
GO:0006796	0.1978	440	185	67	28	13	phosphate-containing compound metabolic process	0
GO:0006807	0.3773	1021	1007	618	358	67	nitrogen compound metabolic process	0
GO:0006810	0.1897	408	268	149	90	31	transport	0
GO:0006811	0.1265	96	48	27	2	0	ion transport	0
GO:0006812	0.1291	45	26	20	15	10	cation transport	0
GO:0006813	0.0688	4	2	2	2	2	potassium ion transport	0
GO:0006814	0.1729	9	8	5	5	5	sodium ion transport	0
GO:0006817	0.4088	4	4	4	3	1	phosphate ion transport	0
GO:0006818	0.1383	15	14	10	8	8	hydrogen transport	0
GO:0006820	0.0694	21	7	2	1	1	anion transport	0
GO:0006835	0.1227	2	0	0	0	0	dicarboxylic acid transport	0
GO:0006865	0.0428	7	2	0	0	0	amino acid transport	0
GO:0006873	0.0277	2	2	2	2	2	cellular ion homeostasis	0
GO:0006875	0.0303	2	2	2	2	2	cellular metal ion homeostasis	0
GO:0006879	0.0323	2	2	2	2	2	cellular iron ion homeostasis	0
GO:0006928	0.3839	22	20	19	11	0	cellular component movement	0
GO:0006935	0.0533	10	0	0	0	0	chemotaxis	0
GO:0006950	0.0874	53	18	15	4	0	response to stress	0
GO:0006952	0.1417	8	8	8	8	3	defense response	0
GO:0006974	0.0834	17	7	7	0	0	cellular response to DNA damage stimulus	0
GO:0006979	0.0907	2	2	1	1	1	response to oxidative stress	0
GO:0006996	0.0352	4	0	0	0	0	organelle organization	0
GO:0007049	0.1027	15	10	9	7	4	cell cycle	0
GO:0007154	0.072	46	37	32	21	7	cell communication	0
GO:0007165	0.0718	47	39	34	21	8	signal transduction	0
GO:0008026	0.1643	5	0	0	0	0	ATP-dependent helicase activity	0
GO:0008033	0.1341	24	4	0	0	0	tRNA processing	0
GO:0008094	0.1225	5	1	1	0	0	DNA-dependent ATPase activity	0
GO:0008104	0.0565	22	9	4	2	2	protein localization	0
GO:0008115	0.1629	2	2	2	2	2	sarcosine oxidase activity	0
GO:0008137	0.2985	9	8	7	2	0	NADH dehydrogenase (ubiquinone) activity	0
GO:0008152	0.6668	2154	2154	2154	1729	536	metabolic process	0
GO:0008168	0.0453	11	0	0	0	0	methyltransferase activity	0
GO:0008233	0.0459	16	0	0	0	0	peptidase activity	0
GO:0008238	0.0369	6	0	0	0	0	exopeptidase activity	0
GO:0008270	0.0313	2	1	0	0	0	zinc ion binding	0
GO:0008272	0.119	3	1	1	1	1	sulfate transport	0
GO:0008299	0.1623	9	5	5	4	4	isoprenoid biosynthetic process	0
GO:0008324	0.1317	54	34	27	1	1	cation transmembrane transporter activity	0
GO:0008360	0.2391	11	8	8	8	3	regulation of cell shape	0
GO:0008410	0.0946	2	2	2	2	2	CoA-transferase activity	0
GO:0008483	0.081	5	3	1	1	1	transaminase activity	0
GO:0008509	0.0597	14	3	0	0	0	anion transmembrane transporter activity	0
GO:0008514	0.0645	6	1	1	0	0	organic anion transmembrane transporter activity	0
GO:0008556	0.4971	3	2	2	2	2	potassium-transporting ATPase activity	0
GO:0008565	0.0288	4	2	2	0	0	protein transporter activity	0
GO:0008610	0.0961	34	15	12	0	0	lipid biosynthetic process	0
GO:0008616	0.117	4	0	0	0	0	queuosine biosynthetic process	0
GO:0008643	0.1449	26	18	14	12	0	carbohydrate transport	0
GO:0008652	0.3032	74	60	40	35	16	cellular amino acid biosynthetic process	0
GO:0008653	0.0729	6	2	0	0	0	lipopolysaccharide metabolic process	0
GO:0008654	0.1354	13	6	6	3	1	phospholipid biosynthetic process	0
GO:0008655	0.1197	1	0	0	0	0	pyrimidine-containing compound salvage	0
GO:0008746	0.3392	2	2	1	1	1	NAD(P)+ transhydrogenase activity	0
GO:0008750	0.3392	2	2	1	1	1	NAD(P)+ transhydrogenase (AB-specific) activity	0
GO:0008757	0.029	2	0	0	0	0	S-adenosylmethionine-dependent methyltransferase activity	0
GO:0008851	0.2608	1	0	0	0	0	ethanolamine ammonia-lyase activity	0
GO:0008901	0.357	3	2	2	2	2	ferredoxin hydrogenase activity	0
GO:0008940	0.0821	1	1	1	1	1	nitrate reductase activity	0
GO:0008982	0.1862	10	9	8	0	0	protein-N(PI)-phosphohistidine-sugar phosphotransferase activity	0
GO:0009008	0.1067	3	0	0	0	0	DNA-methyltransferase activity	0
GO:0009039	0.5394	2	2	1	0	0	urease activity	0
GO:0009055	0.069	31	7	0	0	0	electron carrier activity	0
GO:0009056	0.1301	216	15	3	2	2	catabolic process	0
GO:0009057	0.0321	4	0	0	0	0	macromolecule catabolic process	0
GO:0009058	0.3194	812	678	468	293	119	biosynthetic process	0
GO:0009059	0.1652	373	212	133	100	58	macromolecule biosynthetic process	0
GO:0009060	0.1117	8	0	0	0	0	aerobic respiration	0
GO:0009063	0.1383	11	6	4	1	1	cellular amino acid catabolic process	0
GO:0009064	0.1785	19	9	6	0	0	glutamine family amino acid metabolic process	0
GO:0009065	0.0869	3	1	1	1	1	glutamine family amino acid catabolic process	0
GO:0009066	0.057	3	0	0	0	0	aspartate family amino acid metabolic process	0
GO:0009067	0.0645	3	0	0	0	0	aspartate family amino acid biosynthetic process	0
GO:0009069	0.0176	2	2	2	2	2	serine family amino acid metabolic process	0
GO:0009071	0.04	2	2	2	2	2	serine family amino acid catabolic process	0
GO:0009072	0.1783	16	5	3	1	1	aromatic amino acid family metabolic process	0
GO:0009073	0.2591	13	8	3	1	1	aromatic amino acid family biosynthetic process	0
GO:0009074	0.274	3	2	2	1	1	aromatic amino acid family catabolic process	0
GO:0009081	0.1799	7	1	0	0	0	branched-chain amino acid metabolic process	0
GO:0009082	0.235	7	0	0	0	0	branched-chain amino acid biosynthetic process	0
GO:0009084	0.3467	12	9	7	1	1	glutamine family amino acid biosynthetic process	0
GO:0009085	0.0676	1	0	0	0	0	lysine biosynthetic process	0
GO:0009088	0.1653	2	0	0	0	0	threonine biosynthetic process	0
GO:0009089	0.0718	1	0	0	0	0	lysine biosynthetic process via diaminopimelate	0
GO:0009095	0.1595	2	1	0	0	0	aromatic amino acid family biosynthetic process, prephenate pathway	0
GO:0009097	0.2269	2	0	0	0	0	isoleucine biosynthetic process	0
GO:0009098	0.1413	1	0	0	0	0	leucine biosynthetic process	0
GO:0009103	0.0741	6	2	0	0	0	lipopolysaccharide biosynthetic process	0
GO:0009108	0.1303	49	17	7	3	1	coenzyme biosynthetic process	0
GO:0009110	0.2773	37	26	22	21	19	vitamin biosynthetic process	0
GO:0009112	0.1384	4	1	0	0	0	nucleobase metabolic process	0
GO:0009113	0.0796	2	0	0	0	0	purine nucleobase biosynthetic process	0
GO:0009116	0.1307	124	31	8	6	5	nucleoside metabolic process	0
GO:0009117	0.1623	179	68	23	17	10	nucleotide metabolic process	0
GO:0009119	0.1341	115	28	8	6	4	ribonucleoside metabolic process	0
GO:0009123	0.1193	76	25	4	3	2	nucleoside monophosphate metabolic process	0
GO:0009124	0.2116	37	22	15	11	4	nucleoside monophosphate biosynthetic process	0
GO:0009125	0.0685	25	2	2	2	2	nucleoside monophosphate catabolic process	0
GO:0009126	0.1053	60	25	3	2	2	purine nucleoside monophosphate metabolic process	0
GO:0009127	0.219	27	17	12	10	4	purine nucleoside monophosphate biosynthetic process	0
GO:0009128	0.0699	25	2	2	2	2	purine nucleoside monophosphate catabolic process	0
GO:0009129	0.1708	5	2	2	1	1	pyrimidine nucleoside monophosphate metabolic process	0
GO:0009130	0.1708	5	2	2	1	1	pyrimidine nucleoside monophosphate biosynthetic process	0
GO:0009141	0.1069	73	11	5	2	2	nucleoside triphosphate metabolic process	0
GO:0009142	0.1745	13	11	10	7	7	nucleoside triphosphate biosynthetic process	0
GO:0009143	0.0839	40	2	2	2	2	nucleoside triphosphate catabolic process	0
GO:0009144	0.0986	64	15	4	2	2	purine nucleoside triphosphate metabolic process	0
GO:0009145	0.1891	13	12	9	7	7	purine nucleoside triphosphate biosynthetic process	0
GO:0009146	0.0823	38	2	2	2	2	purine nucleoside triphosphate catabolic process	0
GO:0009147	0.1049	2	1	1	1	1	pyrimidine nucleoside triphosphate metabolic process	0
GO:0009150	0.123	91	26	5	4	2	purine ribonucleotide metabolic process	0
GO:0009152	0.1879	33	18	14	10	5	purine ribonucleotide biosynthetic process	0
GO:0009154	0.0817	38	2	2	2	2	purine ribonucleotide catabolic process	0
GO:0009156	0.2182	34	21	14	11	5	ribonucleoside monophosphate biosynthetic process	0
GO:0009157	0.2784	4	1	1	1	1	deoxyribonucleoside monophosphate biosynthetic process	0
GO:0009158	0.0699	25	2	2	2	2	ribonucleoside monophosphate catabolic process	0
GO:0009161	0.1151	75	26	4	3	3	ribonucleoside monophosphate metabolic process	0
GO:0009162	0.1283	4	1	1	1	1	deoxyribonucleoside monophosphate metabolic process	0
GO:0009163	0.1629	39	15	10	4	1	nucleoside biosynthetic process	0
GO:0009164	0.0777	38	2	2	2	2	nucleoside catabolic process	0
GO:0009165	0.1365	69	31	12	6	5	nucleotide biosynthetic process	0
GO:0009166	0.074	38	2	2	2	2	nucleotide catabolic process	0
GO:0009167	0.1053	60	25	3	2	2	purine ribonucleoside monophosphate metabolic process	0
GO:0009168	0.219	27	17	12	10	4	purine ribonucleoside monophosphate biosynthetic process	0
GO:0009169	0.0699	25	2	2	2	2	purine ribonucleoside monophosphate catabolic process	0
GO:0009173	0.1593	4	4	1	1	1	pyrimidine ribonucleoside monophosphate metabolic process	0
GO:0009174	0.1593	4	4	1	1	1	pyrimidine ribonucleoside monophosphate biosynthetic process	0
GO:0009176	0.2784	4	1	1	1	1	pyrimidine deoxyribonucleoside monophosphate metabolic process	0
GO:0009177	0.2784	4	1	1	1	1	pyrimidine deoxyribonucleoside monophosphate biosynthetic process	0
GO:0009187	0.0205	3	3	0	0	0	cyclic nucleotide metabolic process	0
GO:0009190	0.0205	3	3	0	0	0	cyclic nucleotide biosynthetic process	0
GO:0009199	0.1029	64	12	5	2	2	ribonucleoside triphosphate metabolic process	0
GO:0009200	0.3371	2	2	1	1	1	deoxyribonucleoside triphosphate metabolic process	0
GO:0009201	0.1698	13	11	9	7	7	ribonucleoside triphosphate biosynthetic process	0
GO:0009203	0.0823	38	2	2	2	2	ribonucleoside triphosphate catabolic process	0
GO:0009205	0.0986	64	15	4	2	2	purine ribonucleoside triphosphate metabolic process	0
GO:0009206	0.1891	13	12	9	7	7	purine ribonucleoside triphosphate biosynthetic process	0
GO:0009207	0.0823	38	2	2	2	2	purine ribonucleoside triphosphate catabolic process	0
GO:0009211	0.3371	2	2	1	1	1	pyrimidine deoxyribonucleoside triphosphate metabolic process	0
GO:0009218	0.1113	4	3	0	0	0	pyrimidine ribonucleotide metabolic process	0
GO:0009219	0.2808	3	1	1	1	1	pyrimidine deoxyribonucleotide metabolic process	0
GO:0009220	0.1113	4	3	0	0	0	pyrimidine ribonucleotide biosynthetic process	0
GO:0009221	0.2808	3	1	1	1	1	pyrimidine deoxyribonucleotide biosynthetic process	0
GO:0009228	0.0969	4	2	1	0	0	thiamine biosynthetic process	0
GO:0009229	0.0396	1	1	1	0	0	thiamine diphosphate biosynthetic process	0
GO:0009231	0.2531	4	4	4	3	2	riboflavin biosynthetic process	0
GO:0009233	0.2925	3	1	0	0	0	menaquinone metabolic process	0
GO:0009234	0.2925	3	1	0	0	0	menaquinone biosynthetic process	0
GO:0009235	0.4273	17	15	14	14	13	cobalamin metabolic process	0
GO:0009236	0.4273	17	15	14	14	13	cobalamin biosynthetic process	0
GO:0009240	0.5428	6	5	5	5	4	isopentenyl diphosphate biosynthetic process	0
GO:0009245	0.1504	5	2	0	0	0	lipid A biosynthetic process	0
GO:0009247	0.1116	5	2	0	0	0	glycolipid biosynthetic process	0
GO:0009250	0.1021	3	0	0	0	0	glucan biosynthetic process	0
GO:0009252	0.4514	10	8	8	8	2	peptidoglycan biosynthetic process	0
GO:0009259	0.1392	113	33	7	7	4	ribonucleotide metabolic process	0
GO:0009260	0.2156	43	22	16	15	2	ribonucleotide biosynthetic process	0
GO:0009261	0.0817	38	2	2	2	2	ribonucleotide catabolic process	0
GO:0009262	0.1514	3	2	2	0	0	deoxyribonucleotide metabolic process	0
GO:0009263	0.2211	5	2	2	0	0	deoxyribonucleotide biosynthetic process	0
GO:0009265	0.2808	3	1	1	1	1	2'-deoxyribonucleotide biosynthetic process	0
GO:0009273	0.3738	10	8	8	8	2	peptidoglycan-based cell wall biogenesis	0
GO:0009274	0.124	3	3	2	0	0	peptidoglycan-based cell wall	0
GO:0009276	0.1316	3	3	2	0	0	Gram-negative-bacterium-type cell wall	0
GO:0009279	0.0303	10	4	4	4	4	cell outer membrane	0
GO:0009288	0.4825	25	25	24	20	14	bacterial-type flagellum	0
GO:0009306	0.0397	5	4	1	0	0	protein secretion	0
GO:0009308	0.0496	3	1	0	0	0	amine metabolic process	0
GO:0009309	0.0898	2	0	0	0	0	amine biosynthetic process	0
GO:0009310	0.0205	1	0	0	0	0	amine catabolic process	0
GO:0009311	0.0667	5	2	0	0	0	oligosaccharide metabolic process	0
GO:0009312	0.0744	5	2	0	0	0	oligosaccharide biosynthetic process	0
GO:0009317	0.0555	2	2	2	2	2	acetyl-CoA carboxylase complex	0
GO:0009325	0.1025	1	1	1	1	1	nitrate reductase complex	0
GO:0009394	0.2808	3	1	1	1	1	2'-deoxyribonucleotide metabolic process	0
GO:0009399	0.1451	3	3	3	2	2	nitrogen fixation	0
GO:0009401	0.2367	23	18	14	12	0	phosphoenolpyruvate-dependent sugar phosphotransferase system	0
GO:0009423	0.2698	4	0	0	0	0	chorismate biosynthetic process	0
GO:0009425	0.4388	11	11	11	0	0	bacterial-type flagellum basal body	0
GO:0009426	0.2961	3	0	0	0	0	bacterial-type flagellum basal body, distal rod	0
GO:0009432	0.0618	1	0	0	0	0	SOS response	0
GO:0009451	0.1469	30	7	1	1	1	RNA modification	0
GO:0009605	0.0554	11	0	0	0	0	response to external stimulus	0
GO:0009607	0.1809	8	8	8	8	3	response to biotic stimulus	0
GO:0009615	0.3164	9	8	8	8	5	response to virus	0
GO:0009653	0.1313	12	8	8	8	3	anatomical structure morphogenesis	0
GO:0009889	0.0622	93	40	15	5	1	regulation of biosynthetic process	0
GO:0009987	0.5507	1712	1712	1632	890	439	cellular process	0
GO:0009991	0.0434	1	0	0	0	0	response to extracellular stimulus	0
GO:0010138	0.1197	1	0	0	0	0	pyrimidine ribonucleotide salvage	0
GO:0010181	0.0151	1	0	0	0	0	FMN binding	0
GO:0010467	0.1582	341	202	130	103	57	gene expression	0
GO:0010468	0.0642	96	42	15	5	1	regulation of gene expression	0
GO:0010498	0.272	2	1	0	0	0	proteasomal protein catabolic process	0
GO:0010556	0.0622	93	40	15	5	1	regulation of macromolecule biosynthetic process	0
GO:0010608	0.0963	4	3	3	1	0	posttranscriptional regulation of gene expression	0
GO:0015002	0.1367	5	3	3	2	1	heme-copper terminal oxidase activity	0
GO:0015031	0.0528	20	8	5	2	2	protein transport	0
GO:0015074	0.0062	1	0	0	0	0	DNA integration	0
GO:0015075	0.1392	79	55	37	4	1	ion transmembrane transporter activity	0
GO:0015077	0.1434	30	19	13	11	3	monovalent inorganic cation transmembrane transporter activity	0
GO:0015078	0.1409	21	16	14	9	3	hydrogen ion transmembrane transporter activity	0
GO:0015079	0.1979	6	2	2	2	2	potassium ion transmembrane transporter activity	0
GO:0015081	0.0493	3	0	0	0	0	sodium ion transmembrane transporter activity	0
GO:0015098	0.0778	1	1	1	1	1	molybdate ion transmembrane transporter activity	0
GO:0015103	0.0264	2	1	1	1	1	inorganic anion transmembrane transporter activity	0
GO:0015116	0.1356	3	1	1	1	1	sulfate transmembrane transporter activity	0
GO:0015144	0.1455	17	12	11	7	2	carbohydrate transmembrane transporter activity	0
GO:0015171	0.0459	3	0	0	0	0	amino acid transmembrane transporter activity	0
GO:0015235	0.4744	5	5	5	1	0	cobalamin transporter activity	0
GO:0015291	0.1208	24	14	8	0	0	secondary active transmembrane transporter activity	0
GO:0015293	0.1423	18	11	8	0	0	symporter activity	0
GO:0015294	0.1379	17	8	8	0	0	solute:cation symporter activity	0
GO:0015295	0.1732	10	8	8	1	1	solute:hydrogen symporter activity	0
GO:0015343	0.1283	2	2	2	1	1	siderophore transmembrane transporter activity	0
GO:0015370	0.109	4	0	0	0	0	solute:sodium symporter activity	0
GO:0015399	0.1022	28	16	14	10	7	primary active transmembrane transporter activity	0
GO:0015405	0.1022	28	16	14	10	7	P-P-bond-hydrolysis-driven transmembrane transporter activity	0
GO:0015419	0.1736	3	1	1	1	1	sulfate transmembrane-transporting ATPase activity	0
GO:0015420	0.5322	5	5	5	1	0	cobalamin-transporting ATPase activity	0
GO:0015603	0.1283	2	2	2	1	1	iron chelate transmembrane transporter activity	0
GO:0015627	0.0154	2	2	2	2	2	type II protein secretion system complex	0
GO:0015628	0.0154	2	2	2	2	2	protein secretion by the type II secretion system	0
GO:0015662	0.331	3	2	2	2	2	ATPase activity, coupled to transmembrane movement of ions, phosphorylative mechanism	0
GO:0015672	0.1677	30	21	16	14	13	monovalent inorganic cation transport	0
GO:0015688	0.1189	2	2	2	1	1	iron chelate transport	0
GO:0015689	0.0778	1	1	1	1	1	molybdate ion transport	0
GO:0015698	0.1157	10	5	5	4	1	inorganic anion transport	0
GO:0015711	0.0428	11	2	1	1	1	organic anion transport	0
GO:0015716	0.2123	1	0	0	0	0	organic phosphonate transport	0
GO:0015774	0.0589	1	1	1	1	1	polysaccharide transport	0
GO:0015849	0.0502	13	2	1	0	0	organic acid transport	0
GO:0015891	0.1189	2	2	2	1	1	siderophore transport	0
GO:0015925	0.1399	2	1	1	0	0	galactosidase activity	0
GO:0015930	0.234	2	1	1	1	1	glutamate synthase activity	0
GO:0015934	0.0734	4	0	0	0	0	large ribosomal subunit	0
GO:0015935	0.3782	7	1	0	0	0	small ribosomal subunit	0
GO:0015936	0.1413	2	0	0	0	0	coenzyme A metabolic process	0
GO:0015937	0.1055	2	0	0	0	0	coenzyme A biosynthetic process	0
GO:0015942	0.2331	2	0	0	0	0	formate metabolic process	0
GO:0015980	0.1009	19	7	3	0	0	energy derivation by oxidation of organic compounds	0
GO:0015985	0.2689	13	13	9	7	7	energy coupled proton transport, down electrochemical gradient	0
GO:0015986	0.2689	13	13	9	7	7	ATP synthesis coupled proton transport	0
GO:0015988	0.1405	5	5	4	3	2	energy coupled proton transmembrane transport, against electrochemical gradient	0
GO:0015991	0.1531	5	5	4	3	2	ATP hydrolysis coupled proton transport	0
GO:0015992	0.1383	15	14	10	8	8	proton transport	0
GO:0016020	0.2735	741	643	364	100	5	membrane	0
GO:0016021	0.1941	495	295	105	15	1	integral component of membrane	0
GO:0016043	0.0938	62	17	11	7	3	cellular component organization	0
GO:0016051	0.1009	24	18	12	0	0	carbohydrate biosynthetic process	0
GO:0016052	0.0782	17	0	0	0	0	carbohydrate catabolic process	0
GO:0016053	0.2399	98	70	50	39	16	organic acid biosynthetic process	0
GO:0016054	0.083	14	4	2	1	1	organic acid catabolic process	0
GO:0016070	0.108	247	101	37	19	11	RNA metabolic process	0
GO:0016072	0.1024	6	0	0	0	0	rRNA metabolic process	0
GO:0016114	0.1885	7	5	5	4	4	terpenoid biosynthetic process	0
GO:0016151	0.2168	6	4	2	0	0	nickel cation binding	0
GO:0016163	0.1332	1	1	1	1	1	nitrogenase activity	0
GO:0016301	0.0635	46	4	2	2	2	kinase activity	0
GO:0016310	0.0631	50	4	2	2	2	phosphorylation	0
GO:0016405	0.164	2	2	2	2	2	CoA-ligase activity	0
GO:0016421	0.0555	2	2	2	2	2	CoA carboxylase activity	0
GO:0016462	0.1692	228	81	27	1	0	pyrophosphatase activity	0
GO:0016469	0.1791	12	12	7	6	6	proton-transporting two-sector ATPase complex	0
GO:0016491	0.1784	375	191	100	16	11	oxidoreductase activity	0
GO:0016624	0.151	1	1	0	0	0	oxidoreductase activity, acting on the aldehyde or oxo group of donors, disulfide as acceptor	0
GO:0016627	0.0199	1	0	0	0	0	oxidoreductase activity, acting on the CH-CH group of donors	0
GO:0016638	0.0473	5	3	3	3	3	oxidoreductase activity, acting on the CH-NH2 group of donors	0
GO:0016641	0.0117	1	1	1	0	0	oxidoreductase activity, acting on the CH-NH2 group of donors, oxygen as acceptor	0
GO:0016642	0.1578	2	2	2	2	2	oxidoreductase activity, acting on the CH-NH2 group of donors, disulfide as acceptor	0
GO:0016645	0.0685	2	2	1	0	0	oxidoreductase activity, acting on the CH-NH group of donors	0
GO:0016647	0.1629	2	2	2	2	2	oxidoreductase activity, acting on the CH-NH group of donors, oxygen as acceptor	0
GO:0016651	0.2989	23	21	21	16	13	oxidoreductase activity, acting on NAD(P)H	0
GO:0016652	0.2436	2	2	1	1	1	oxidoreductase activity, acting on NAD(P)H, NAD(P) as acceptor	0
GO:0016655	0.4195	19	18	17	17	14	oxidoreductase activity, acting on NAD(P)H, quinone or similar compound as acceptor	0
GO:0016661	0.1705	5	3	2	1	1	oxidoreductase activity, acting on other nitrogenous compounds as donors	0
GO:0016667	0.0185	2	0	0	0	0	oxidoreductase activity, acting on a sulfur group of donors	0
GO:0016671	0.0759	2	2	2	2	2	oxidoreductase activity, acting on a sulfur group of donors, disulfide as acceptor	0
GO:0016675	0.1503	5	3	3	2	1	oxidoreductase activity, acting on a heme group of donors	0
GO:0016676	0.1503	5	3	3	2	1	oxidoreductase activity, acting on a heme group of donors, oxygen as acceptor	0
GO:0016695	0.357	3	2	2	2	2	oxidoreductase activity, acting on hydrogen as donor	0
GO:0016699	0.357	3	2	2	2	2	oxidoreductase activity, acting on hydrogen as donor, iron-sulfur protein as acceptor	0
GO:0016701	0.0227	2	0	0	0	0	oxidoreductase activity, acting on single donors with incorporation of molecular oxygen	0
GO:0016702	0.0599	2	0	0	0	0	oxidoreductase activity, acting on single donors with incorporation of molecular oxygen, incorporation of two atoms of oxygen	0
GO:0016705	0.0232	5	0	0	0	0	oxidoreductase activity, acting on paired donors, with incorporation or reduction of molecular oxygen	0
GO:0016706	0.0585	2	0	0	0	0	oxidoreductase activity, acting on paired donors, with incorporation or reduction of molecular oxygen, 2-oxoglutarate as one donor, and incorporation of one atom each of oxygen into both donors	0
GO:0016725	0.1773	3	3	1	0	0	oxidoreductase activity, acting on CH or CH2 groups	0
GO:0016726	0.0529	1	0	0	0	0	oxidoreductase activity, acting on CH or CH2 groups, NAD or NADP as acceptor	0
GO:0016730	0.3101	4	4	4	2	2	oxidoreductase activity, acting on iron-sulfur proteins as donors	0
GO:0016732	0.1332	1	1	1	1	1	oxidoreductase activity, acting on iron-sulfur proteins as donors, dinitrogen as acceptor	0
GO:0016740	0.2302	671	337	3	1	1	transferase activity	0
GO:0016741	0.0469	18	0	0	0	0	transferase activity, transferring one-carbon groups	0
GO:0016746	0.0305	1	0	0	0	0	transferase activity, transferring acyl groups	0
GO:0016757	0.0338	4	0	0	0	0	transferase activity, transferring glycosyl groups	0
GO:0016758	0.0231	1	0	0	0	0	transferase activity, transferring hexosyl groups	0
GO:0016763	0.1009	10	1	0	0	0	transferase activity, transferring pentosyl groups	0
GO:0016769	0.0789	5	3	1	1	1	transferase activity, transferring nitrogenous groups	0
GO:0016772	0.1013	188	20	7	0	0	transferase activity, transferring phosphorus-containing groups	0
GO:0016773	0.0727	43	18	9	0	0	phosphotransferase activity, alcohol group as acceptor	0
GO:0016775	0.0372	16	6	2	2	2	phosphotransferase activity, nitrogenous group as acceptor	0
GO:0016779	0.0352	2	1	1	0	0	nucleotidyltransferase activity	0
GO:0016782	0.0248	2	1	1	0	0	transferase activity, transferring sulfur-containing groups	0
GO:0016787	0.2923	830	736	131	0	0	hydrolase activity	0
GO:0016788	0.0936	123	8	8	5	0	hydrolase activity, acting on ester bonds	0
GO:0016791	0.0257	1	0	0	0	0	phosphatase activity	0
GO:0016798	0.0972	35	25	8	0	0	hydrolase activity, acting on glycosyl bonds	0
GO:0016810	0.0383	1	0	0	0	0	hydrolase activity, acting on carbon-nitrogen (but not peptide) bonds	0
GO:0016811	0.0272	2	1	1	1	1	hydrolase activity, acting on carbon-nitrogen (but not peptide) bonds, in linear amides	0
GO:0016813	0.026	1	0	0	0	0	hydrolase activity, acting on carbon-nitrogen (but not peptide) bonds, in linear amidines	0
GO:0016817	0.1675	231	81	27	1	0	hydrolase activity, acting on acid anhydrides	0
GO:0016818	0.1676	227	81	27	1	0	hydrolase activity, acting on acid anhydrides, in phosphorus-containing anhydrides	0
GO:0016820	0.1235	29	18	14	10	6	hydrolase activity, acting on acid anhydrides, catalyzing transmembrane movement of substances	0
GO:0016829	0.0938	105	3	0	0	0	lyase activity	0
GO:0016832	0.0191	1	0	0	0	0	aldehyde-lyase activity	0
GO:0016835	0.0601	13	1	1	0	0	carbon-oxygen lyase activity	0
GO:0016836	0.0715	7	0	0	0	0	hydro-lyase activity	0
GO:0016841	0.043	1	1	0	0	0	ammonia-lyase activity	0
GO:0016849	0.0199	3	3	0	0	0	phosphorus-oxygen lyase activity	0
GO:0016853	0.056	31	0	0	0	0	isomerase activity	0
GO:0016859	0.0318	2	1	1	0	0	cis-trans isomerase activity	0
GO:0016860	0.0601	3	1	1	0	0	intramolecular oxidoreductase activity	0
GO:0016861	0.0908	3	0	0	0	0	intramolecular oxidoreductase activity, interconverting aldoses and ketoses	0
GO:0016874	0.1548	67	36	23	14	6	ligase activity	0
GO:0016875	0.2583	20	19	15	14	10	ligase activity, forming carbon-oxygen bonds	0
GO:0016876	0.2583	20	19	15	14	10	ligase activity, forming aminoacyl-tRNA and related compounds	0
GO:0016877	0.0639	2	2	2	2	2	ligase activity, forming carbon-sulfur bonds	0
GO:0016878	0.0639	2	2	2	2	2	acid-thiol ligase activity	0
GO:0016879	0.1067	16	8	6	3	3	ligase activity, forming carbon-nitrogen bonds	0
GO:0016881	0.0989	5	4	3	3	3	acid-amino acid ligase activity	0
GO:0016885	0.0475	2	2	2	2	2	ligase activity, forming carbon-carbon bonds	0
GO:0016887	0.1215	106	32	4	2	2	ATPase activity	0
GO:0016903	0.0656	3	0	0	0	0	oxidoreductase activity, acting on the aldehyde or oxo group of donors	0
GO:0016998	0.0186	3	0	0	0	0	cell wall macromolecule catabolic process	0
GO:0017076	0.2419	469	245	123	61	20	purine nucleotide binding	0
GO:0017111	0.1675	213	80	27	1	0	nucleoside-triphosphatase activity	0
GO:0018065	0.0916	1	0	0	0	0	protein-cofactor linkage	0
GO:0018106	0.0614	2	0	0	0	0	peptidyl-histidine phosphorylation	0
GO:0018130	0.1601	385	211	117	61	0	heterocycle biosynthetic process	0
GO:0018193	0.0259	2	1	0	0	0	peptidyl-amino acid modification	0
GO:0018202	0.0614	2	0	0	0	0	peptidyl-histidine modification	0
GO:0018208	0.033	2	1	1	0	0	peptidyl-proline modification	0
GO:0018492	0.3233	2	1	1	1	1	carbon-monoxide dehydrogenase (acceptor) activity	0
GO:0019001	0.0477	8	0	0	0	0	guanyl nucleotide binding	0
GO:0019012	0.0613	10	1	0	0	0	virion	0
GO:0019015	0.1772	10	1	0	0	0	viral genome	0
GO:0019038	0.1772	10	1	0	0	0	provirus	0
GO:0019219	0.0582	81	39	13	5	1	regulation of nucleobase-containing compound metabolic process	0
GO:0019222	0.0685	108	42	15	3	1	regulation of metabolic process	0
GO:0019288	0.5428	6	5	5	5	4	isopentenyl diphosphate biosynthetic process, methylerythritol 4-phosphate pathway	0
GO:0019294	0.1281	2	0	0	0	0	keto-3-deoxy-D-manno-octulosonic acid biosynthetic process	0
GO:0019295	0.4256	2	1	1	0	0	coenzyme M biosynthetic process	0
GO:0019296	0.4256	2	1	1	0	0	coenzyme M metabolic process	0
GO:0019318	0.0714	9	1	0	0	0	hexose metabolic process	0
GO:0019320	0.0593	5	1	1	0	0	hexose catabolic process	0
GO:0019321	0.0755	3	0	0	0	0	pentose metabolic process	0
GO:0019362	0.0515	2	0	0	0	0	pyridine nucleotide metabolic process	0
GO:0019438	0.1526	368	190	104	39	1	aromatic compound biosynthetic process	0
GO:0019439	0.0816	59	4	2	2	2	aromatic compound catabolic process	0
GO:0019464	0.166	2	2	2	2	2	glycine decarboxylation via glycine cleavage system	0
GO:0019509	0.0896	2	1	1	1	1	L-methionine salvage from methylthioadenosine	0
GO:0019538	0.2035	288	136	102	78	59	protein metabolic process	0
GO:0019545	0.4524	3	1	1	0	0	arginine catabolic process to succinate	0
GO:0019556	0.3881	2	1	0	0	0	histidine catabolic process to glutamate and formamide	0
GO:0019557	0.3881	2	1	0	0	0	histidine catabolic process to glutamate and formate	0
GO:0019566	0.0571	1	0	0	0	0	arabinose metabolic process	0
GO:0019585	0.123	2	0	0	0	0	glucuronate metabolic process	0
GO:0019627	0.4485	3	3	3	3	2	urea metabolic process	0
GO:0019634	0.7296	6	6	5	2	0	organic phosphonate metabolic process	0
GO:0019637	0.1979	288	136	53	27	11	organophosphate metabolic process	0
GO:0019682	0.5428	6	5	5	5	4	glyceraldehyde-3-phosphate metabolic process	0
GO:0019692	0.2305	3	1	1	1	1	deoxyribose phosphate metabolic process	0
GO:0019693	0.1453	119	44	9	7	3	ribose phosphate metabolic process	0
GO:0019700	0.0812	1	0	0	0	0	organic phosphonate catabolic process	0
GO:0019720	0.1271	5	4	3	3	3	Mo-molybdopterin cofactor metabolic process	0
GO:0019725	0.0253	2	2	1	1	1	cellular homeostasis	0
GO:0019752	0.2912	249	137	103	71	36	carboxylic acid metabolic process	0
GO:0019829	0.2719	14	13	10	7	6	cation-transporting ATPase activity	0
GO:0019843	0.3905	36	36	35	30	8	rRNA binding	0
GO:0019856	0.0288	1	1	0	0	0	pyrimidine nucleobase biosynthetic process	0
GO:0019867	0.0398	25	4	4	4	4	outer membrane	0
GO:0020037	0.0672	18	7	0	0	0	heme binding	0
GO:0022402	0.0187	1	1	1	0	0	cell cycle process	0
GO:0022411	0.0598	1	0	0	0	0	cellular component disassembly	0
GO:0022603	0.2269	11	8	8	8	3	regulation of anatomical structure morphogenesis	0
GO:0022604	0.2391	11	8	8	8	3	regulation of cell morphogenesis	0
GO:0022607	0.0782	22	9	4	0	0	cellular component assembly	0
GO:0022613	0.1116	12	5	1	1	1	ribonucleoprotein complex biogenesis	0
GO:0022804	0.1213	63	34	22	4	1	active transmembrane transporter activity	0
GO:0022857	0.1289	144	76	41	6	0	transmembrane transporter activity	0
GO:0022890	0.1226	35	24	15	10	0	inorganic cation transmembrane transporter activity	0
GO:0022891	0.1273	101	54	38	9	0	substrate-specific transmembrane transporter activity	0
GO:0022892	0.1256	114	60	40	7	0	substrate-specific transporter activity	0
GO:0022900	0.2002	16	16	9	5	1	electron transport chain	0
GO:0022904	0.1249	9	6	0	0	0	respiratory electron transport chain	0
GO:0023014	0.0376	16	7	2	2	2	signal transduction by phosphorylation	0
GO:0023052	0.0718	47	39	34	21	8	signaling	0
GO:0030001	0.1012	19	10	10	8	6	metal ion transport	0
GO:0030003	0.0303	2	2	2	2	2	cellular cation homeostasis	0
GO:0030030	0.0554	8	1	0	0	0	cell projection organization	0
GO:0030031	0.0487	4	0	0	0	0	cell projection assembly	0
GO:0030091	0.1253	2	2	2	2	2	protein repair	0
GO:0030145	0.031	1	0	0	0	0	manganese ion binding	0
GO:0030170	0.0698	9	2	2	2	2	pyridoxal phosphate binding	0
GO:0030203	0.127	10	8	8	7	2	glycosaminoglycan metabolic process	0
GO:0030246	0.0174	2	0	0	0	0	carbohydrate binding	0
GO:0030288	0.0278	3	2	1	0	0	outer membrane-bounded periplasmic space	0
GO:0030312	0.0496	28	12	7	4	3	external encapsulating structure	0
GO:0030313	0.0559	27	12	9	4	3	cell envelope	0
GO:0030529	0.2293	58	55	53	51	46	ribonucleoprotein complex	0
GO:0030554	0.2182	429	195	95	25	15	adenyl nucleotide binding	0
GO:0030694	0.3872	5	2	0	0	0	bacterial-type flagellum basal body, rod	0
GO:0031224	0.1943	496	295	105	15	1	intrinsic component of membrane	0
GO:0031323	0.0646	100	43	15	5	1	regulation of cellular metabolic process	0
GO:0031326	0.0622	93	40	15	5	1	regulation of cellular biosynthetic process	0
GO:0031418	0.1017	1	0	0	0	0	L-ascorbic acid binding	0
GO:0031668	0.0434	1	0	0	0	0	cellular response to extracellular stimulus	0
GO:0031975	0.0557	27	12	9	4	3	envelope	0
GO:0032196	0.092	13	11	10	2	2	transposition	0
GO:0032259	0.0457	11	0	0	0	0	methylation	0
GO:0032262	0.1197	1	0	0	0	0	pyrimidine nucleotide salvage	0
GO:0032268	0.0835	4	3	3	1	0	regulation of cellular protein metabolic process	0
GO:0032324	0.1271	5	4	3	3	3	molybdopterin cofactor biosynthetic process	0
GO:0032392	0.1391	2	0	0	0	0	DNA geometric change	0
GO:0032502	0.0968	12	8	8	8	3	developmental process	0
GO:0032506	0.0256	1	1	1	0	0	cytokinetic process	0
GO:0032508	0.1391	2	0	0	0	0	DNA duplex unwinding	0
GO:0032549	0.2442	456	239	123	70	17	ribonucleoside binding	0
GO:0032550	0.2409	455	238	122	63	19	purine ribonucleoside binding	0
GO:0032553	0.2405	485	240	123	63	19	ribonucleotide binding	0
GO:0032555	0.2394	457	240	122	63	19	purine ribonucleotide binding	0
GO:0032559	0.2161	417	189	95	25	15	adenyl ribonucleotide binding	0
GO:0032561	0.0477	8	0	0	0	0	guanyl ribonucleotide binding	0
GO:0032774	0.062	89	46	13	4	1	RNA biosynthetic process	0
GO:0032784	0.0452	1	0	0	0	0	regulation of DNA-templated transcription, elongation	0
GO:0032787	0.0765	11	7	7	7	4	monocarboxylic acid metabolic process	0
GO:0032940	0.0396	5	4	1	0	0	secretion by cell	0
GO:0032984	0.0598	1	0	0	0	0	macromolecular complex disassembly	0
GO:0032989	0.2292	12	8	8	8	3	cellular component morphogenesis	0
GO:0032991	0.1741	109	81	70	61	54	macromolecular complex	0
GO:0033013	0.2876	30	25	21	18	18	tetrapyrrole metabolic process	0
GO:0033014	0.3002	32	24	22	18	18	tetrapyrrole biosynthetic process	0
GO:0033036	0.0656	33	10	4	3	2	macromolecule localization	0
GO:0033037	0.0589	1	1	1	1	1	polysaccharide localization	0
GO:0033178	0.2552	7	6	5	2	2	proton-transporting two-sector ATPase complex, catalytic domain	0
GO:0033212	0.1111	2	2	2	1	1	iron assimilation	0
GO:0033214	0.1189	2	2	2	1	1	iron assimilation by chelation and transport	0
GO:0033554	0.0756	17	7	7	0	0	cellular response to stress	0
GO:0033692	0.0691	11	5	1	1	1	cellular polysaccharide biosynthetic process	0
GO:0033865	0.094	2	0	0	0	0	nucleoside bisphosphate metabolic process	0
GO:0033866	0.1055	2	0	0	0	0	nucleoside bisphosphate biosynthetic process	0
GO:0033875	0.094	2	0	0	0	0	ribonucleoside bisphosphate metabolic process	0
GO:0034030	0.1055	2	0	0	0	0	ribonucleoside bisphosphate biosynthetic process	0
GO:0034032	0.094	2	0	0	0	0	purine nucleoside bisphosphate metabolic process	0
GO:0034033	0.1055	2	0	0	0	0	purine nucleoside bisphosphate biosynthetic process	0
GO:0034062	0.0548	2	2	1	0	0	RNA polymerase activity	0
GO:0034220	0.0999	23	18	12	8	8	ion transmembrane transport	0
GO:0034470	0.1655	40	15	1	1	1	ncRNA processing	0
GO:0034637	0.0664	11	5	1	1	1	cellular carbohydrate biosynthetic process	0
GO:0034641	0.3128	838	720	394	223	20	cellular nitrogen compound metabolic process	0
GO:0034645	0.1623	359	206	131	99	58	cellular macromolecule biosynthetic process	0
GO:0034654	0.1016	227	98	28	7	0	nucleobase-containing compound biosynthetic process	0
GO:0034655	0.0827	51	4	2	2	2	nucleobase-containing compound catabolic process	0
GO:0034660	0.2732	70	39	27	16	5	ncRNA metabolic process	0
GO:0035383	0.1082	2	1	1	1	1	thioester metabolic process	0
GO:0035435	0.5421	2	2	0	0	0	phosphate ion transmembrane transport	0
GO:0035556	0.0451	23	10	4	0	0	intracellular signal transduction	0
GO:0035639	0.2411	455	238	122	63	19	purine ribonucleoside triphosphate binding	0
GO:0036094	0.2763	636	376	170	82	19	small molecule binding	0
GO:0036211	0.0263	1	0	0	0	0	protein modification process	0
GO:0036442	0.1268	2	0	0	0	0	hydrogen-exporting ATPase activity	0
GO:0038023	0.0373	16	7	2	2	2	signaling receptor activity	0
GO:0040011	0.223	27	25	23	11	0	locomotion	0
GO:0040012	0.0071	1	0	0	0	0	regulation of locomotion	0
GO:0040029	0.0925	5	0	0	0	0	regulation of gene expression, epigenetic	0
GO:0042126	0.116	2	1	0	0	0	nitrate metabolic process	0
GO:0042168	0.1846	5	3	1	0	0	heme metabolic process	0
GO:0042180	0.0705	5	0	0	0	0	cellular ketone metabolic process	0
GO:0042181	0.1033	1	0	0	0	0	ketone biosynthetic process	0
GO:0042221	0.0265	9	0	0	0	0	response to chemical	0
GO:0042254	0.1116	12	5	1	1	1	ribosome biogenesis	0
GO:0042278	0.1167	86	17	5	3	2	purine nucleoside metabolic process	0
GO:0042330	0.0533	10	0	0	0	0	taxis	0
GO:0042357	0.0396	1	1	1	0	0	thiamine diphosphate metabolic process	0
GO:0042364	0.2773	37	26	22	21	19	water-soluble vitamin biosynthetic process	0
GO:0042401	0.0898	2	0	0	0	0	cellular biogenic amine biosynthetic process	0
GO:0042402	0.0205	1	0	0	0	0	cellular biogenic amine catabolic process	0
GO:0042430	0.1224	2	0	0	0	0	indole-containing compound metabolic process	0
GO:0042435	0.1815	2	0	0	0	0	indole-containing compound biosynthetic process	0
GO:0042436	0.0293	1	0	0	0	0	indole-containing compound catabolic process	0
GO:0042439	0.0956	3	0	0	0	0	ethanolamine-containing compound metabolic process	0
GO:0042440	0.0808	6	1	1	0	0	pigment metabolic process	0
GO:0042451	0.1643	24	10	8	6	2	purine nucleoside biosynthetic process	0
GO:0042454	0.0783	38	2	2	2	2	ribonucleoside catabolic process	0
GO:0042455	0.1648	39	15	9	4	1	ribonucleoside biosynthetic process	0
GO:0042537	0.0301	1	0	0	0	0	benzene-containing compound metabolic process	0
GO:0042546	0.3585	10	8	8	8	2	cell wall biogenesis	0
GO:0042578	0.0268	1	0	0	0	0	phosphoric ester hydrolase activity	0
GO:0042592	0.0225	3	1	1	1	1	homeostatic process	0
GO:0042597	0.026	2	2	2	0	0	periplasmic space	0
GO:0042623	0.1168	49	24	5	0	0	ATPase activity, coupled	0
GO:0042625	0.2613	17	16	11	9	6	ATPase activity, coupled to transmembrane movement of ions	0
GO:0042626	0.1265	28	17	15	10	7	ATPase activity, coupled to transmembrane movement of substances	0
GO:0042723	0.0605	3	1	0	0	0	thiamine-containing compound metabolic process	0
GO:0042724	0.0969	4	2	1	0	0	thiamine-containing compound biosynthetic process	0
GO:0042726	0.2531	4	4	4	3	2	flavin-containing compound metabolic process	0
GO:0042727	0.2531	4	4	4	3	2	flavin-containing compound biosynthetic process	0
GO:0042773	0.2645	6	4	1	0	0	ATP synthesis coupled electron transport	0
GO:0042777	0.4614	12	12	9	7	6	plasma membrane ATP synthesis coupled proton transport	0
GO:0042822	0.0403	3	0	0	0	0	pyridoxal phosphate metabolic process	0
GO:0042823	0.0403	3	0	0	0	0	pyridoxal phosphate biosynthetic process	0
GO:0042927	0.1189	2	2	2	1	1	siderophore transporter activity	0
GO:0042995	0.1268	18	17	16	7	0	cell projection	0
GO:0043038	0.5388	20	19	15	14	10	amino acid activation	0
GO:0043039	0.5388	20	19	15	14	10	tRNA aminoacylation	0
GO:0043094	0.1306	3	1	0	0	0	cellular metabolic compound salvage	0
GO:0043102	0.0896	2	1	1	1	1	amino acid salvage	0
GO:0043115	0.1946	1	0	0	0	0	precorrin-2 dehydrogenase activity	0
GO:0043167	0.3663	956	902	401	154	21	ion binding	0
GO:0043168	0.2725	587	360	169	73	19	anion binding	0
GO:0043169	0.1907	468	128	2	0	0	cation binding	0
GO:0043170	0.3006	815	685	389	225	96	macromolecule metabolic process	0
GO:0043225	0.0839	2	1	1	1	1	anion transmembrane-transporting ATPase activity	0
GO:0043226	0.2306	104	87	81	73	58	organelle	0
GO:0043228	0.2425	104	88	82	73	58	non-membrane-bounded organelle	0
GO:0043229	0.2311	104	87	81	73	58	intracellular organelle	0
GO:0043232	0.2425	104	88	82	73	58	intracellular non-membrane-bounded organelle	0
GO:0043234	0.0687	32	12	7	6	4	protein complex	0
GO:0043241	0.0598	1	0	0	0	0	protein complex disassembly	0
GO:0043412	0.083	55	8	1	1	1	macromolecule modification	0
GO:0043414	0.0549	6	0	0	0	0	macromolecule methylation	0
GO:0043419	0.5394	2	2	1	0	0	urea catabolic process	0
GO:0043436	0.2926	254	139	108	75	36	oxoacid metabolic process	0
GO:0043492	0.1265	28	17	15	10	7	ATPase activity, coupled to movement of substances	0
GO:0043545	0.1271	5	4	3	3	3	molybdopterin cofactor metabolic process	0
GO:0043565	0.0196	7	0	0	0	0	sequence-specific DNA binding	0
GO:0043603	0.0714	5	5	3	2	2	cellular amide metabolic process	0
GO:0043605	0.2337	3	0	0	0	0	cellular amide catabolic process	0
GO:0043606	0.3881	2	1	0	0	0	formamide metabolic process	0
GO:0043648	0.1351	13	0	0	0	0	dicarboxylic acid metabolic process	0
GO:0043650	0.1947	9	0	0	0	0	dicarboxylic acid biosynthetic process	0
GO:0043933	0.0355	2	0	0	0	0	macromolecular complex subunit organization	0
GO:0044036	0.1064	10	8	8	8	2	cell wall macromolecule metabolic process	0
GO:0044038	0.3908	10	8	8	8	2	cell wall macromolecule biosynthetic process	0
GO:0044042	0.1184	2	0	0	0	0	glucan metabolic process	0
GO:0044085	0.1319	59	26	12	7	2	cellular component biogenesis	0
GO:0044106	0.078	3	0	0	0	0	cellular amine metabolic process	0
GO:0044205	0.2956	4	3	1	1	1	'de novo' UMP biosynthetic process	0
GO:0044206	0.1197	1	0	0	0	0	UMP salvage	0
GO:0044237	0.5007	1477	1477	1158	728	338	cellular metabolic process	0
GO:0044238	0.4686	1365	1365	996	605	234	primary metabolic process	0
GO:0044248	0.1022	106	3	2	2	2	cellular catabolic process	0
GO:0044249	0.3057	751	599	429	267	121	cellular biosynthetic process	0
GO:0044255	0.0868	33	15	13	1	0	cellular lipid metabolic process	0
GO:0044257	0.0642	2	0	0	0	0	cellular protein catabolic process	0
GO:0044260	0.2634	668	497	306	213	91	cellular macromolecule metabolic process	0
GO:0044262	0.0546	11	3	1	1	1	cellular carbohydrate metabolic process	0
GO:0044264	0.0584	11	4	1	1	1	cellular polysaccharide metabolic process	0
GO:0044267	0.2204	163	117	92	76	61	cellular protein metabolic process	0
GO:0044270	0.0832	62	4	2	2	2	cellular nitrogen compound catabolic process	0
GO:0044271	0.153	376	176	92	45	0	cellular nitrogen compound biosynthetic process	0
GO:0044281	0.356	603	417	257	187	70	small molecule metabolic process	0
GO:0044282	0.0765	17	1	1	0	0	small molecule catabolic process	0
GO:0044283	0.2822	178	114	86	49	22	small molecule biosynthetic process	0
GO:0044391	0.2002	14	10	1	0	0	ribosomal subunit	0
GO:0044422	0.1777	39	30	17	0	0	organelle part	0
GO:0044423	0.0613	10	1	0	0	0	virion part	0
GO:0044424	0.3298	528	372	267	164	79	intracellular part	0
GO:0044425	0.2011	516	318	119	15	1	membrane part	0
GO:0044427	0.1102	9	1	0	0	0	chromosomal part	0
GO:0044444	0.2	70	59	53	50	46	cytoplasmic part	0
GO:0044446	0.1107	21	10	1	0	0	intracellular organelle part	0
GO:0044461	0.4127	17	16	15	6	0	bacterial-type flagellum part	0
GO:0044462	0.0453	22	6	5	4	4	external encapsulating structure part	0
GO:0044463	0.4127	17	16	15	6	0	cell projection part	0
GO:0044464	0.3453	867	804	469	205	105	cell part	0
GO:0044699	0.5069	1539	1539	1335	623	103	single-organism process	0
GO:0044700	0.0718	47	39	34	21	8	single organism signaling	0
GO:0044710	0.4341	1171	1171	727	361	56	single-organism metabolic process	0
GO:0044711	0.3103	425	275	210	132	46	single-organism biosynthetic process	0
GO:0044712	0.1094	125	2	2	2	2	single-organism catabolic process	0
GO:0044718	0.1283	2	2	2	1	1	siderophore transmembrane transport	0
GO:0044723	0.1173	60	30	12	0	0	single-organism carbohydrate metabolic process	0
GO:0044724	0.0993	9	1	1	0	0	single-organism carbohydrate catabolic process	0
GO:0044728	0.0925	5	0	0	0	0	DNA methylation or demethylation	0
GO:0044763	0.4072	1128	1128	652	334	97	single-organism cellular process	0
GO:0044765	0.1391	273	108	58	18	0	single-organism transport	0
GO:0044767	0.1184	12	8	8	8	3	single-organism developmental process	0
GO:0044769	0.4064	12	12	9	7	6	ATPase activity, coupled to transmembrane movement of ions, rotational mechanism	0
GO:0044780	0.0821	4	0	0	0	0	bacterial-type flagellum assembly	0
GO:0044781	0.1113	8	0	0	0	0	bacterial-type flagellum organization	0
GO:0045184	0.0565	22	9	4	2	2	establishment of protein localization	0
GO:0045226	0.027	1	0	0	0	0	extracellular polysaccharide biosynthetic process	0
GO:0045259	0.2008	8	7	5	4	4	proton-transporting ATP synthase complex	0
GO:0045261	0.2333	4	4	2	2	2	proton-transporting ATP synthase complex, catalytic core F(1)	0
GO:0045263	0.0561	1	0	0	0	0	proton-transporting ATP synthase complex, coupling factor F(o)	0
GO:0045333	0.1163	20	7	3	0	0	cellular respiration	0
GO:0046034	0.0934	48	16	2	2	2	ATP metabolic process	0
GO:0046039	0.0635	1	0	0	0	0	GTP metabolic process	0
GO:0046040	0.3469	9	5	4	3	2	IMP metabolic process	0
GO:0046049	0.1593	4	4	1	1	1	UMP metabolic process	0
GO:0046085	0.0713	1	0	0	0	0	adenosine metabolic process	0
GO:0046112	0.2319	5	2	2	0	0	nucleobase biosynthetic process	0
GO:0046116	0.117	4	0	0	0	0	queuosine metabolic process	0
GO:0046128	0.1163	83	18	5	3	2	purine ribonucleoside metabolic process	0
GO:0046129	0.1643	24	10	8	6	2	purine ribonucleoside biosynthetic process	0
GO:0046130	0.0823	38	2	2	2	2	purine ribonucleoside catabolic process	0
GO:0046131	0.106	4	2	0	0	0	pyrimidine ribonucleoside metabolic process	0
GO:0046132	0.1096	4	2	0	0	0	pyrimidine ribonucleoside biosynthetic process	0
GO:0046134	0.1096	4	2	0	0	0	pyrimidine nucleoside biosynthetic process	0
GO:0046148	0.0899	6	1	1	0	0	pigment biosynthetic process	0
GO:0046218	0.0293	1	0	0	0	0	indolalkylamine catabolic process	0
GO:0046219	0.1815	2	0	0	0	0	indolalkylamine biosynthetic process	0
GO:0046351	0.0899	2	2	0	0	0	disaccharide biosynthetic process	0
GO:0046365	0.0966	9	1	1	0	0	monosaccharide catabolic process	0
GO:0046373	0.0571	1	0	0	0	0	L-arabinose metabolic process	0
GO:0046379	0.027	1	0	0	0	0	extracellular polysaccharide metabolic process	0
GO:0046385	0.2808	3	1	1	1	1	deoxyribose phosphate biosynthetic process	0
GO:0046390	0.2035	44	22	16	10	1	ribose phosphate biosynthetic process	0
GO:0046394	0.2414	98	70	50	39	16	carboxylic acid biosynthetic process	0
GO:0046395	0.083	14	4	2	1	1	carboxylic acid catabolic process	0
GO:0046400	0.1281	2	0	0	0	0	keto-3-deoxy-D-manno-octulosonic acid metabolic process	0
GO:0046417	0.136	4	0	0	0	0	chorismate metabolic process	0
GO:0046434	0.0867	55	2	2	2	2	organophosphate catabolic process	0
GO:0046451	0.0718	1	0	0	0	0	diaminopimelate metabolic process	0
GO:0046467	0.1116	5	2	0	0	0	membrane lipid biosynthetic process	0
GO:0046483	0.3134	832	717	410	245	22	heterocycle metabolic process	0
GO:0046490	0.5428	6	5	5	5	4	isopentenyl diphosphate metabolic process	0
GO:0046493	0.1504	5	2	0	0	0	lipid A metabolic process	0
GO:0046496	0.0515	2	0	0	0	0	nicotinamide nucleotide metabolic process	0
GO:0046501	0.2195	2	1	1	0	0	protoporphyrinogen IX metabolic process	0
GO:0046700	0.0827	61	4	2	2	2	heterocycle catabolic process	0
GO:0046872	0.1862	457	78	1	0	0	metal ion binding	0
GO:0046873	0.0991	16	8	4	1	0	metal ion transmembrane transporter activity	0
GO:0046903	0.0388	5	4	1	0	0	secretion	0
GO:0046906	0.0558	17	6	0	0	0	tetrapyrrole binding	0
GO:0046914	0.098	88	17	0	0	0	transition metal ion binding	0
GO:0046915	0.0549	2	2	1	1	1	transition metal ion transmembrane transporter activity	0
GO:0046916	0.0303	2	2	2	2	2	cellular transition metal ion homeostasis	0
GO:0046933	0.4159	12	12	9	7	6	proton-transporting ATP synthase activity, rotational mechanism	0
GO:0046942	0.0502	13	2	1	0	0	carboxylic acid transport	0
GO:0046943	0.0862	8	1	0	0	0	carboxylic acid transmembrane transporter activity	0
GO:0046961	0.1268	2	0	0	0	0	proton-transporting ATPase activity, rotational mechanism	0
GO:0048029	0.1045	2	0	0	0	0	monosaccharide binding	0
GO:0048037	0.1084	101	38	4	3	2	cofactor binding	0
GO:0048038	0.1786	10	6	6	4	1	quinone binding	0
GO:0048856	0.1313	12	8	8	8	3	anatomical structure development	0
GO:0048869	0.1313	12	8	8	8	3	cellular developmental process	0
GO:0048870	0.3951	22	20	19	11	0	cell motility	0
GO:0048878	0.068	2	2	2	1	1	chemical homeostasis	0
GO:0050136	0.3925	13	13	12	11	9	NADH dehydrogenase (quinone) activity	0
GO:0050661	0.0628	5	0	0	0	0	NADP binding	0
GO:0050662	0.0606	44	0	0	0	0	coenzyme binding	0
GO:0050789	0.1041	218	85	57	43	11	regulation of biological process	0
GO:0050793	0.2235	11	8	8	8	3	regulation of developmental process	0
GO:0050794	0.0996	193	81	57	44	12	regulation of cellular process	0
GO:0050801	0.068	2	2	2	1	1	ion homeostasis	0
GO:0050896	0.1106	165	60	49	33	7	response to stimulus	0
GO:0051082	0.0421	2	0	0	0	0	unfolded protein binding	0
GO:0051119	0.1395	10	8	8	1	1	sugar transmembrane transporter activity	0
GO:0051128	0.1633	12	8	8	7	3	regulation of cellular component organization	0
GO:0051171	0.0582	81	39	13	5	1	regulation of nitrogen compound metabolic process	0
GO:0051179	0.207	434	302	190	124	46	localization	0
GO:0051183	0.2116	5	5	4	1	0	vitamin transporter activity	0
GO:0051186	0.145	83	31	18	3	3	cofactor metabolic process	0
GO:0051188	0.1494	65	31	15	4	3	cofactor biosynthetic process	0
GO:0051189	0.1201	5	4	3	3	3	prosthetic group metabolic process	0
GO:0051213	0.0468	14	3	3	1	1	dioxygenase activity	0
GO:0051234	0.191	413	274	152	99	33	establishment of localization	0
GO:0051246	0.0835	4	3	3	1	0	regulation of protein metabolic process	0
GO:0051252	0.0573	81	39	13	5	1	regulation of RNA metabolic process	0
GO:0051301	0.0818	14	9	9	5	4	cell division	0
GO:0051302	0.0509	1	1	1	1	1	regulation of cell division	0
GO:0051536	0.1496	85	27	16	3	1	iron-sulfur cluster binding	0
GO:0051537	0.0215	1	1	1	1	1	2 iron, 2 sulfur cluster binding	0
GO:0051539	0.062	7	0	0	0	0	4 iron, 4 sulfur cluster binding	0
GO:0051603	0.0642	2	0	0	0	0	proteolysis involved in cellular protein catabolic process	0
GO:0051607	0.3431	9	8	8	8	5	defense response to virus	0
GO:0051641	0.0445	9	5	1	0	0	cellular localization	0
GO:0051649	0.0478	10	5	0	0	0	establishment of localization in cell	0
GO:0051674	0.3951	22	20	19	11	0	localization of cell	0
GO:0051704	0.0512	19	9	8	8	2	multi-organism process	0
GO:0051707	0.1957	8	8	8	8	3	response to other organism	0
GO:0051716	0.0914	85	49	37	20	10	cellular response to stimulus	0
GO:0051726	0.1084	1	1	1	1	1	regulation of cell cycle	0
GO:0052689	0.0527	3	3	3	1	0	carboxylic ester hydrolase activity	0
GO:0052803	0.1999	7	5	5	3	3	imidazole-containing compound metabolic process	0
GO:0052805	0.3881	2	1	0	0	0	imidazole-containing compound catabolic process	0
GO:0055065	0.0688	2	2	2	1	1	metal ion homeostasis	0
GO:0055072	0.0309	2	2	2	2	2	iron ion homeostasis	0
GO:0055076	0.0688	2	2	2	1	1	transition metal ion homeostasis	0
GO:0055080	0.0709	2	2	2	1	1	cation homeostasis	0
GO:0055082	0.0277	2	2	2	2	2	cellular chemical homeostasis	0
GO:0055085	0.0645	67	27	16	10	3	transmembrane transport	0
GO:0055086	0.1721	226	78	32	17	11	nucleobase-containing small molecule metabolic process	0
GO:0055114	0.1956	397	218	108	25	10	oxidation-reduction process	0
GO:0055129	0.7846	2	2	2	1	1	L-proline biosynthetic process	0
GO:0060089	0.0632	38	30	28	12	6	molecular transducer activity	0
GO:0060255	0.0659	104	42	16	5	1	regulation of macromolecule metabolic process	0
GO:0061505	0.2769	4	3	0	0	0	DNA topoisomerase II activity	0
GO:0065007	0.1075	248	87	56	40	12	biological regulation	0
GO:0065008	0.0869	15	11	11	6	2	regulation of biological quality	0
GO:0070008	0.06	1	0	0	0	0	serine-type exopeptidase activity	0
GO:0070011	0.0476	20	0	0	0	0	peptidase activity, acting on L-amino acid peptides	0
GO:0070035	0.1643	5	0	0	0	0	purine NTP-dependent helicase activity	0
GO:0070189	0.0904	1	0	0	0	0	kynurenine metabolic process	0
GO:0070402	0.1167	2	0	0	0	0	NADPH binding	0
GO:0070525	0.0713	1	0	0	0	0	threonylcarbamoyladenosine metabolic process	0
GO:0070526	0.0713	1	0	0	0	0	threonylcarbamoyladenosine biosynthetic process	0
GO:0070589	0.3908	10	8	8	8	2	cellular component macromolecule biosynthetic process	0
GO:0070925	0.0931	4	0	0	0	0	organelle assembly	0
GO:0071103	0.0426	7	1	0	0	0	DNA conformation change	0
GO:0071265	0.0445	1	1	1	1	1	L-methionine biosynthetic process	0
GO:0071267	0.0896	2	1	1	1	1	L-methionine salvage	0
GO:0071496	0.0434	1	0	0	0	0	cellular response to external stimulus	0
GO:0071554	0.0864	10	8	8	8	2	cell wall organization or biogenesis	0
GO:0071702	0.1087	108	38	26	14	0	organic substance transport	0
GO:0071704	0.5234	1558	1558	1386	762	347	organic substance metabolic process	0
GO:0071705	0.0334	5	0	0	0	0	nitrogen compound transport	0
GO:0071804	0.2053	2	0	0	0	0	cellular potassium ion transport	0
GO:0071805	0.2053	2	0	0	0	0	potassium ion transmembrane transport	0
GO:0071806	0.0261	2	2	1	0	0	protein transmembrane transport	0
GO:0071822	0.0328	1	0	0	0	0	protein complex subunit organization	0
GO:0071840	0.1162	85	36	11	8	3	cellular component organization or biogenesis	0
GO:0071941	0.2257	6	6	6	6	4	nitrogen cycle metabolic process	0
GO:0071944	0.1382	289	100	42	15	2	cell periphery	0
GO:0072330	0.0156	2	2	2	2	2	monocarboxylic acid biosynthetic process	0
GO:0072348	0.0254	1	1	1	1	1	sulfur compound transport	0
GO:0072521	0.1318	109	38	6	5	2	purine-containing compound metabolic process	0
GO:0072522	0.1813	36	16	14	6	2	purine-containing compound biosynthetic process	0
GO:0072523	0.0804	39	2	2	2	2	purine-containing compound catabolic process	0
GO:0072527	0.1111	11	5	1	0	0	pyrimidine-containing compound metabolic process	0
GO:0072528	0.0993	9	4	0	0	0	pyrimidine-containing compound biosynthetic process	0
GO:0080090	0.0648	101	44	14	5	1	regulation of primary metabolic process	0
GO:0090304	0.1828	447	281	145	56	22	nucleic acid metabolic process	0
GO:0090305	0.0568	17	2	2	2	2	nucleic acid phosphodiester bond hydrolysis	0
GO:0090407	0.1626	121	70	21	9	1	organophosphate biosynthetic process	0
GO:0090482	0.4745	5	5	5	1	0	vitamin transmembrane transporter activity	0
GO:0090529	0.0256	1	1	1	0	0	cell septum assembly	0
GO:0097159	0.3538	1015	997	496	266	77	organic cyclic compound binding	0
GO:0097367	0.2434	494	252	124	71	17	carbohydrate derivative binding	0
GO:0098542	0.2286	8	8	8	8	3	defense response to other organism	0
GO:1901068	0.0695	9	0	0	0	0	guanosine-containing compound metabolic process	0
GO:1901069	0.0635	4	0	0	0	0	guanosine-containing compound catabolic process	0
GO:1901135	0.1859	277	107	31	7	4	carbohydrate derivative metabolic process	0
GO:1901136	0.0794	40	3	3	2	2	carbohydrate derivative catabolic process	0
GO:1901137	0.1898	94	60	16	7	2	carbohydrate derivative biosynthetic process	0
GO:1901160	0.0768	3	0	0	0	0	primary amino compound metabolic process	0
GO:1901265	0.2589	582	321	151	75	19	nucleoside phosphate binding	0
GO:1901269	0.1504	5	2	0	0	0	lipooligosaccharide metabolic process	0
GO:1901271	0.1504	5	2	0	0	0	lipooligosaccharide biosynthetic process	0
GO:1901292	0.0761	40	2	2	2	2	nucleoside phosphate catabolic process	0
GO:1901293	0.1365	68	31	12	6	5	nucleoside phosphate biosynthetic process	0
GO:1901360	0.322	851	747	434	264	24	organic cyclic compound metabolic process	0
GO:1901361	0.0847	63	4	2	2	2	organic cyclic compound catabolic process	0
GO:1901362	0.17	400	225	137	73	2	organic cyclic compound biosynthetic process	0
GO:1901363	0.3527	1010	991	499	265	77	heterocyclic compound binding	0
GO:1901476	0.1455	17	12	11	7	2	carbohydrate transporter activity	0
GO:1901564	0.3638	576	405	254	171	57	organonitrogen compound metabolic process	0
GO:1901565	0.0934	73	3	2	2	2	organonitrogen compound catabolic process	0
GO:1901566	0.3624	307	218	164	113	45	organonitrogen compound biosynthetic process	0
GO:1901575	0.1263	203	11	3	2	2	organic substance catabolic process	0
GO:1901576	0.31	772	610	435	274	120	organic substance biosynthetic process	0
GO:1901605	0.2434	98	60	34	30	13	alpha-amino acid metabolic process	0
GO:1901606	0.1438	9	4	4	1	1	alpha-amino acid catabolic process	0
GO:1901607	0.2947	61	48	30	29	12	alpha-amino acid biosynthetic process	0
GO:1901615	0.0223	1	0	0	0	0	organic hydroxy compound metabolic process	0
GO:1901657	0.1305	125	31	8	6	5	glycosyl compound metabolic process	0
GO:1901658	0.0777	38	2	2	2	2	glycosyl compound catabolic process	0
GO:1901659	0.1586	39	15	10	4	1	glycosyl compound biosynthetic process	0
GO:1901661	0.1033	1	0	0	0	0	quinone metabolic process	0
GO:1901663	0.1033	1	0	0	0	0	quinone biosynthetic process	0
GO:1901677	0.2979	3	3	3	1	1	phosphate transmembrane transporter activity	0
GO:1901678	0.0683	2	2	2	1	1	iron coordination entity transport	0
GO:1901682	0.0558	1	1	1	1	1	sulfur compound transmembrane transporter activity	0
GO:1990204	0.0178	1	1	1	0	0	oxidoreductase complex	0
GO:2000112	0.0622	93	40	15	5	1	regulation of cellular macromolecule biosynthetic process	0
GO:2001057	0.116	2	1	0	0	0	reactive nitrogen species metabolic process	0
GO:2001141	0.0572	81	39	13	5	1	regulation of RNA biosynthetic process	0
GO:2001293	0.5706	2	2	2	1	1	malonyl-CoA metabolic process	0
GO:2001295	0.5706	2	2	2	1	1	malonyl-CoA biosynthetic process	0

## Sheet: MPP-O___known_predictions
		# of gene families for which a GO term is predicted at Precision≥X%
GO term	AUPRC	0.1	0.3	0.5	0.7	0.9	Description	Highlighted in paper
GO:0009405	0.0863	34	14	2	0	0	pathogenesis	1
GO:0009579	0.41	66	49	40	2	1	thylakoid	1
GO:0015979	0.3447	69	50	42	4	1	photosynthesis	1		total COG/NOG gene families analyzed in MPP-O
GO:0016051	0.054	14	7	5	3	1	carbohydrate biosynthetic process	1		14331
GO:0030089	0.4666	15	15	9	6	1	phycobilisome	1
GO:0032196	0.1728	28	20	14	6	0	transposition	1
GO:0034357	0.41	66	49	40	2	1	photosynthetic membrane	1
GO:0048870	0.1472	16	14	5	0	0	cell motility	1
GO:0000049	0.1039	9	3	1	0	0	tRNA binding	0
GO:0000096	0.0347	2	0	0	0	0	sulfur amino acid metabolic process	0
GO:0000097	0.0668	2	0	0	0	0	sulfur amino acid biosynthetic process	0
GO:0000105	0.2579	5	4	4	1	0	histidine biosynthetic process	0
GO:0000155	0.0299	3	0	0	0	0	phosphorelay sensor kinase activity	0
GO:0000160	0.0554	5	0	0	0	0	phosphorelay signal transduction system	0
GO:0000162	0.1654	3	1	0	0	0	tryptophan biosynthetic process	0
GO:0000166	0.188	1219	221	44	6	2	nucleotide binding	0
GO:0000178	0.2073	2	0	0	0	0	exosome (RNase complex)	0
GO:0000255	0.2249	3	1	0	0	0	allantoin metabolic process	0
GO:0000256	0.1061	2	0	0	0	0	allantoin catabolic process	0
GO:0000270	0.0397	5	1	0	0	0	peptidoglycan metabolic process	0
GO:0000271	0.0541	11	6	4	3	1	polysaccharide biosynthetic process	0
GO:0000287	0.0517	6	0	0	0	0	magnesium ion binding	0
GO:0000738	0.2868	1	0	0	0	0	DNA catabolic process, exonucleolytic	0
GO:0000902	0.0846	8	1	0	0	0	cell morphogenesis	0
GO:0000910	0.0409	4	3	1	0	0	cytokinesis	0
GO:0000917	0.0578	4	3	1	0	0	barrier septum assembly	0
GO:0001071	0.0554	25	1	0	0	0	nucleic acid binding transcription factor activity	0
GO:0001514	0.1387	1	0	0	0	0	selenocysteine incorporation	0
GO:0001539	0.1495	16	14	5	0	0	ciliary or bacterial-type flagellar motility	0
GO:0001882	0.1625	515	125	34	3	3	nucleoside binding	0
GO:0001883	0.1615	505	127	33	3	3	purine nucleoside binding	0
GO:0002161	0.0728	1	1	1	0	0	aminoacyl-tRNA editing activity	0
GO:0002252	0.1312	5	5	4	2	0	immune effector process	0
GO:0002376	0.1164	5	5	4	2	0	immune system process	0
GO:0003676	0.2566	2272	506	69	33	17	nucleic acid binding	0
GO:0003677	0.1978	1745	65	19	11	1	DNA binding	0
GO:0003700	0.0552	25	1	0	0	0	sequence-specific DNA binding transcription factor activity	0
GO:0003723	0.1592	109	51	25	21	17	RNA binding	0
GO:0003735	0.3274	85	61	48	37	16	structural constituent of ribosome	0
GO:0003774	0.2171	12	10	0	0	0	motor activity	0
GO:0003824	0.6626	7331	7331	7331	2664	96	catalytic activity	0
GO:0003913	0.5455	2	2	1	0	0	DNA photolyase activity	0
GO:0003916	0.04	2	0	0	0	0	DNA topoisomerase activity	0
GO:0003918	0.1382	2	0	0	0	0	DNA topoisomerase type II (ATP-hydrolyzing) activity	0
GO:0003954	0.2124	10	9	9	7	2	NADH dehydrogenase activity	0
GO:0004175	0.0212	3	0	0	0	0	endopeptidase activity	0
GO:0004197	0.0507	1	0	0	0	0	cysteine-type endopeptidase activity	0
GO:0004252	0.03	2	2	2	1	1	serine-type endopeptidase activity	0
GO:0004333	0.0867	2	2	2	0	0	fumarate hydratase activity	0
GO:0004375	0.2501	2	1	1	1	1	glycine dehydrogenase (decarboxylating) activity	0
GO:0004386	0.0643	12	6	1	0	0	helicase activity	0
GO:0004497	0.02	1	0	0	0	0	monooxygenase activity	0
GO:0004518	0.0634	34	6	4	4	4	nuclease activity	0
GO:0004519	0.0465	13	4	2	0	0	endonuclease activity	0
GO:0004527	0.0468	10	5	5	4	4	exonuclease activity	0
GO:0004553	0.0497	17	0	0	0	0	hydrolase activity, hydrolyzing O-glycosyl compounds	0
GO:0004672	0.03	4	0	0	0	0	protein kinase activity	0
GO:0004673	0.028	3	0	0	0	0	protein histidine kinase activity	0
GO:0004733	0.0394	1	0	0	0	0	pyridoxamine-phosphate oxidase activity	0
GO:0004774	0.1976	1	0	0	0	0	succinate-CoA ligase activity	0
GO:0004775	0.1976	1	0	0	0	0	succinate-CoA ligase (ADP-forming) activity	0
GO:0004803	0.1757	23	18	13	2	0	transposase activity	0
GO:0004812	0.1764	15	13	11	3	2	aminoacyl-tRNA ligase activity	0
GO:0004834	0.311	2	0	0	0	0	tryptophan synthase activity	0
GO:0004871	0.0545	25	6	2	0	0	signal transducer activity	0
GO:0004872	0.0443	6	2	0	0	0	receptor activity	0
GO:0005198	0.2528	92	67	52	35	16	structural molecule activity	0
GO:0005215	0.1138	382	27	10	4	2	transporter activity	0
GO:0005315	0.4148	3	3	3	2	1	inorganic phosphate transmembrane transporter activity	0
GO:0005351	0.0954	4	3	3	2	2	sugar:hydrogen symporter activity	0
GO:0005402	0.0954	4	3	3	2	2	cation:sugar symporter activity	0
GO:0005488	0.4572	5004	5004	1344	192	12	binding	0
GO:0005506	0.0308	8	1	1	1	1	iron ion binding	0
GO:0005524	0.1459	416	63	8	2	0	ATP binding	0
GO:0005576	0.0426	12	1	0	0	0	extracellular region	0
GO:0005618	0.0813	13	5	4	1	0	cell wall	0
GO:0005622	0.2812	1199	467	270	104	24	intracellular	0
GO:0005623	0.306	2459	927	361	127	36	cell	0
GO:0005694	0.0809	15	0	0	0	0	chromosome	0
GO:0005727	0.0181	1	0	0	0	0	extrachromosomal circular DNA	0
GO:0005737	0.2736	607	311	179	69	30	cytoplasm	0
GO:0005773	0.0804	1	0	0	0	0	vacuole	0
GO:0005840	0.2833	87	63	52	36	15	ribosome	0
GO:0005886	0.1074	201	38	27	17	5	plasma membrane	0
GO:0005975	0.0966	150	12	6	1	1	carbohydrate metabolic process	0
GO:0005976	0.0509	9	5	4	3	1	polysaccharide metabolic process	0
GO:0005996	0.024	1	0	0	0	0	monosaccharide metabolic process	0
GO:0006006	0.0223	1	0	0	0	0	glucose metabolic process	0
GO:0006022	0.0377	5	1	0	0	0	aminoglycan metabolic process	0
GO:0006023	0.1377	5	1	0	0	0	aminoglycan biosynthetic process	0
GO:0006024	0.1377	5	1	0	0	0	glycosaminoglycan biosynthetic process	0
GO:0006073	0.0879	3	0	0	0	0	cellular glucan metabolic process	0
GO:0006081	0.1977	4	3	0	0	0	cellular aldehyde metabolic process	0
GO:0006082	0.1868	226	83	50	2	2	organic acid metabolic process	0
GO:0006084	0.1554	5	0	0	0	0	acetyl-CoA metabolic process	0
GO:0006089	0.3971	2	0	0	0	0	lactate metabolic process	0
GO:0006090	0.225	4	4	1	0	0	pyruvate metabolic process	0
GO:0006091	0.0745	41	4	4	0	0	generation of precursor metabolites and energy	0
GO:0006099	0.0933	4	1	0	0	0	tricarboxylic acid cycle	0
GO:0006105	0.2025	1	0	0	0	0	succinate metabolic process	0
GO:0006139	0.264	2416	564	144	1	1	nucleobase-containing compound metabolic process	0
GO:0006144	0.1105	1	1	0	0	0	purine nucleobase metabolic process	0
GO:0006163	0.0683	68	2	0	0	0	purine nucleotide metabolic process	0
GO:0006164	0.0638	12	0	0	0	0	purine nucleotide biosynthetic process	0
GO:0006259	0.1203	219	31	21	16	3	DNA metabolic process	0
GO:0006260	0.0625	18	0	0	0	0	DNA replication	0
GO:0006261	0.0294	1	0	0	0	0	DNA-dependent DNA replication	0
GO:0006265	0.0414	2	0	0	0	0	DNA topological change	0
GO:0006268	0.4077	2	0	0	0	0	DNA unwinding involved in DNA replication	0
GO:0006281	0.0465	8	0	0	0	0	DNA repair	0
GO:0006304	0.028	3	1	0	0	0	DNA modification	0
GO:0006310	0.1048	41	21	15	3	0	DNA recombination	0
GO:0006313	0.1744	28	20	14	6	0	transposition, DNA-mediated	0
GO:0006323	0.0246	1	0	0	0	0	DNA packaging	0
GO:0006351	0.1287	840	7	4	4	3	transcription, DNA-templated	0
GO:0006355	0.1291	778	7	4	4	3	regulation of transcription, DNA-templated	0
GO:0006364	0.0333	1	0	0	0	0	rRNA processing	0
GO:0006396	0.068	21	0	0	0	0	RNA processing	0
GO:0006399	0.1232	34	13	7	5	3	tRNA metabolic process	0
GO:0006401	0.0234	1	0	0	0	0	RNA catabolic process	0
GO:0006412	0.2717	133	88	63	44	16	translation	0
GO:0006414	0.0193	1	1	1	0	0	translational elongation	0
GO:0006417	0.0235	1	1	1	0	0	regulation of translation	0
GO:0006418	0.2855	15	12	10	3	2	tRNA aminoacylation for protein translation	0
GO:0006448	0.0438	1	1	1	0	0	regulation of translational elongation	0
GO:0006450	0.048	1	1	1	0	0	regulation of translational fidelity	0
GO:0006451	0.1387	1	0	0	0	0	translational readthrough	0
GO:0006464	0.0703	21	14	12	4	0	cellular protein modification process	0
GO:0006508	0.0375	5	0	0	0	0	proteolysis	0
GO:0006520	0.2103	148	71	43	2	2	cellular amino acid metabolic process	0
GO:0006546	0.1079	1	0	0	0	0	glycine catabolic process	0
GO:0006547	0.1919	5	4	4	1	0	histidine metabolic process	0
GO:0006555	0.0768	2	0	0	0	0	methionine metabolic process	0
GO:0006560	0.2091	2	1	0	0	0	proline metabolic process	0
GO:0006561	0.2091	2	1	0	0	0	proline biosynthetic process	0
GO:0006568	0.0735	3	0	0	0	0	tryptophan metabolic process	0
GO:0006576	0.0301	2	0	0	0	0	cellular biogenic amine metabolic process	0
GO:0006586	0.0735	3	0	0	0	0	indolalkylamine metabolic process	0
GO:0006629	0.0676	37	15	2	0	0	lipid metabolic process	0
GO:0006637	0.1366	5	0	0	0	0	acyl-CoA metabolic process	0
GO:0006643	0.0614	3	2	0	0	0	membrane lipid metabolic process	0
GO:0006644	0.1167	15	11	5	1	0	phospholipid metabolic process	0
GO:0006664	0.0667	3	2	0	0	0	glycolipid metabolic process	0
GO:0006720	0.0549	4	0	0	0	0	isoprenoid metabolic process	0
GO:0006721	0.0739	4	0	0	0	0	terpenoid metabolic process	0
GO:0006725	0.2954	2669	828	263	19	7	cellular aromatic compound metabolic process	0
GO:0006730	0.0367	2	0	0	0	0	one-carbon metabolic process	0
GO:0006732	0.0694	32	0	0	0	0	coenzyme metabolic process	0
GO:0006753	0.0991	145	0	0	0	0	nucleoside phosphate metabolic process	0
GO:0006754	0.0637	4	3	0	0	0	ATP biosynthetic process	0
GO:0006766	0.2072	35	19	18	15	14	vitamin metabolic process	0
GO:0006767	0.2072	35	19	18	15	14	water-soluble vitamin metabolic process	0
GO:0006768	0.0822	2	0	0	0	0	biotin metabolic process	0
GO:0006772	0.078	3	2	1	0	0	thiamine metabolic process	0
GO:0006777	0.2405	4	4	4	0	0	Mo-molybdopterin cofactor biosynthetic process	0
GO:0006778	0.0923	5	5	0	0	0	porphyrin-containing compound metabolic process	0
GO:0006779	0.1064	5	5	0	0	0	porphyrin-containing compound biosynthetic process	0
GO:0006782	0.1304	2	0	0	0	0	protoporphyrinogen IX biosynthetic process	0
GO:0006783	0.1027	2	2	1	1	1	heme biosynthetic process	0
GO:0006790	0.0535	8	3	0	0	0	sulfur compound metabolic process	0
GO:0006793	0.1465	507	68	16	11	6	phosphorus metabolic process	0
GO:0006796	0.1338	463	42	4	0	0	phosphate-containing compound metabolic process	0
GO:0006807	0.339	2999	1308	471	201	19	nitrogen compound metabolic process	0
GO:0006810	0.1621	1519	54	19	10	10	transport	0
GO:0006811	0.0674	26	13	11	9	7	ion transport	0
GO:0006812	0.0684	15	12	10	8	5	cation transport	0
GO:0006814	0.1834	6	6	6	6	5	sodium ion transport	0
GO:0006817	0.2686	3	3	3	2	1	phosphate ion transport	0
GO:0006818	0.0679	5	5	4	2	1	hydrogen transport	0
GO:0006820	0.0341	3	3	3	3	2	anion transport	0
GO:0006928	0.1387	19	13	5	0	0	cellular component movement	0
GO:0006935	0.0458	3	0	0	0	0	chemotaxis	0
GO:0006950	0.0495	24	0	0	0	0	response to stress	0
GO:0006952	0.0512	6	4	4	2	0	defense response	0
GO:0006974	0.0445	8	0	0	0	0	cellular response to DNA damage stimulus	0
GO:0006996	0.0317	6	0	0	0	0	organelle organization	0
GO:0007049	0.0342	7	0	0	0	0	cell cycle	0
GO:0007059	0.0645	1	0	0	0	0	chromosome segregation	0
GO:0007154	0.0556	27	8	5	4	4	cell communication	0
GO:0007165	0.0586	32	8	5	4	4	signal transduction	0
GO:0008094	0.0414	1	0	0	0	0	DNA-dependent ATPase activity	0
GO:0008104	0.0512	16	0	0	0	0	protein localization	0
GO:0008135	0.0357	1	0	0	0	0	translation factor activity, nucleic acid binding	0
GO:0008137	0.1318	5	4	4	2	2	NADH dehydrogenase (ubiquinone) activity	0
GO:0008152	0.6133	6892	6892	5611	1673	180	metabolic process	0
GO:0008168	0.0987	89	33	12	2	1	methyltransferase activity	0
GO:0008194	0.1064	1	0	0	0	0	UDP-glycosyltransferase activity	0
GO:0008198	0.0507	2	2	2	0	0	ferrous iron binding	0
GO:0008233	0.0403	6	0	0	0	0	peptidase activity	0
GO:0008236	0.0255	2	2	2	1	1	serine-type peptidase activity	0
GO:0008270	0.0376	12	0	0	0	0	zinc ion binding	0
GO:0008299	0.0589	4	0	0	0	0	isoprenoid biosynthetic process	0
GO:0008324	0.048	10	6	4	0	0	cation transmembrane transporter activity	0
GO:0008360	0.0854	5	3	0	0	0	regulation of cell shape	0
GO:0008375	0.0873	1	0	0	0	0	acetylglucosaminyltransferase activity	0
GO:0008410	0.1895	2	1	1	1	1	CoA-transferase activity	0
GO:0008556	0.1799	2	1	1	1	1	potassium-transporting ATPase activity	0
GO:0008610	0.0828	35	12	8	0	0	lipid biosynthetic process	0
GO:0008643	0.0638	11	4	3	0	0	carbohydrate transport	0
GO:0008652	0.1799	72	33	26	8	3	cellular amino acid biosynthetic process	0
GO:0008653	0.0555	4	2	1	0	0	lipopolysaccharide metabolic process	0
GO:0008654	0.1481	15	11	5	3	2	phospholipid biosynthetic process	0
GO:0008757	0.047	4	3	0	0	0	S-adenosylmethionine-dependent methyltransferase activity	0
GO:0008851	0.1704	2	2	2	2	2	ethanolamine ammonia-lyase activity	0
GO:0008901	0.246	3	2	1	0	0	ferredoxin hydrogenase activity	0
GO:0008940	0.358	3	3	2	1	1	nitrate reductase activity	0
GO:0008982	0.1289	7	2	1	0	0	protein-N(PI)-phosphohistidine-sugar phosphotransferase activity	0
GO:0009039	0.6161	3	1	0	0	0	urease activity	0
GO:0009055	0.0578	20	1	0	0	0	electron carrier activity	0
GO:0009056	0.0777	66	9	0	0	0	catabolic process	0
GO:0009058	0.3176	2524	877	449	210	55	biosynthetic process	0
GO:0009059	0.2086	1659	220	84	47	23	macromolecule biosynthetic process	0
GO:0009060	0.0493	4	1	0	0	0	aerobic respiration	0
GO:0009064	0.0691	2	0	0	0	0	glutamine family amino acid metabolic process	0
GO:0009066	0.0372	3	0	0	0	0	aspartate family amino acid metabolic process	0
GO:0009067	0.04	3	0	0	0	0	aspartate family amino acid biosynthetic process	0
GO:0009071	0.1079	1	0	0	0	0	serine family amino acid catabolic process	0
GO:0009072	0.0954	4	2	0	0	0	aromatic amino acid family metabolic process	0
GO:0009073	0.1165	7	2	0	0	0	aromatic amino acid family biosynthetic process	0
GO:0009084	0.0802	1	0	0	0	0	glutamine family amino acid biosynthetic process	0
GO:0009086	0.0858	2	0	0	0	0	methionine biosynthetic process	0
GO:0009102	0.0822	2	0	0	0	0	biotin biosynthetic process	0
GO:0009103	0.0565	4	2	1	0	0	lipopolysaccharide biosynthetic process	0
GO:0009108	0.0595	10	0	0	0	0	coenzyme biosynthetic process	0
GO:0009110	0.2153	34	19	18	15	14	vitamin biosynthetic process	0
GO:0009112	0.0432	1	0	0	0	0	nucleobase metabolic process	0
GO:0009116	0.0681	56	0	0	0	0	nucleoside metabolic process	0
GO:0009117	0.0999	143	0	0	0	0	nucleotide metabolic process	0
GO:0009119	0.0727	44	0	0	0	0	ribonucleoside metabolic process	0
GO:0009123	0.0569	15	0	0	0	0	nucleoside monophosphate metabolic process	0
GO:0009124	0.0652	13	0	0	0	0	nucleoside monophosphate biosynthetic process	0
GO:0009126	0.0445	1	0	0	0	0	purine nucleoside monophosphate metabolic process	0
GO:0009127	0.0564	8	1	0	0	0	purine nucleoside monophosphate biosynthetic process	0
GO:0009141	0.0484	3	1	0	0	0	nucleoside triphosphate metabolic process	0
GO:0009142	0.0568	4	3	0	0	0	nucleoside triphosphate biosynthetic process	0
GO:0009144	0.0464	3	1	0	0	0	purine nucleoside triphosphate metabolic process	0
GO:0009145	0.063	4	3	0	0	0	purine nucleoside triphosphate biosynthetic process	0
GO:0009150	0.0664	42	2	0	0	0	purine ribonucleotide metabolic process	0
GO:0009152	0.0601	10	0	0	0	0	purine ribonucleotide biosynthetic process	0
GO:0009156	0.0636	13	0	0	0	0	ribonucleoside monophosphate biosynthetic process	0
GO:0009161	0.0627	17	0	0	0	0	ribonucleoside monophosphate metabolic process	0
GO:0009165	0.0693	52	0	0	0	0	nucleotide biosynthetic process	0
GO:0009167	0.0445	1	0	0	0	0	purine ribonucleoside monophosphate metabolic process	0
GO:0009168	0.0564	8	1	0	0	0	purine ribonucleoside monophosphate biosynthetic process	0
GO:0009187	0.0397	3	2	1	0	0	cyclic nucleotide metabolic process	0
GO:0009190	0.041	3	2	1	0	0	cyclic nucleotide biosynthetic process	0
GO:0009199	0.0477	3	1	0	0	0	ribonucleoside triphosphate metabolic process	0
GO:0009201	0.0583	4	3	0	0	0	ribonucleoside triphosphate biosynthetic process	0
GO:0009205	0.0464	3	1	0	0	0	purine ribonucleoside triphosphate metabolic process	0
GO:0009206	0.063	4	3	0	0	0	purine ribonucleoside triphosphate biosynthetic process	0
GO:0009228	0.0907	3	2	1	0	0	thiamine biosynthetic process	0
GO:0009235	0.2886	16	16	15	12	6	cobalamin metabolic process	0
GO:0009236	0.2948	16	16	15	12	6	cobalamin biosynthetic process	0
GO:0009240	0.3197	4	4	1	0	0	isopentenyl diphosphate biosynthetic process	0
GO:0009245	0.1412	3	2	0	0	0	lipid A biosynthetic process	0
GO:0009247	0.1075	3	2	0	0	0	glycolipid biosynthetic process	0
GO:0009250	0.112	2	1	1	0	0	glucan biosynthetic process	0
GO:0009252	0.1448	5	1	0	0	0	peptidoglycan biosynthetic process	0
GO:0009259	0.0793	81	0	0	0	0	ribonucleotide metabolic process	0
GO:0009260	0.0927	16	0	0	0	0	ribonucleotide biosynthetic process	0
GO:0009273	0.1247	5	1	0	0	0	peptidoglycan-based cell wall biogenesis	0
GO:0009274	0.1911	4	4	4	1	0	peptidoglycan-based cell wall	0
GO:0009276	0.2034	4	4	4	1	0	Gram-negative-bacterium-type cell wall	0
GO:0009288	0.1803	21	15	12	1	0	bacterial-type flagellum	0
GO:0009295	0.0144	1	0	0	0	0	nucleoid	0
GO:0009297	0.1424	4	2	0	0	0	pilus assembly	0
GO:0009306	0.0407	4	0	0	0	0	protein secretion	0
GO:0009308	0.0206	1	0	0	0	0	amine metabolic process	0
GO:0009309	0.0892	3	1	0	0	0	amine biosynthetic process	0
GO:0009311	0.0572	4	1	0	0	0	oligosaccharide metabolic process	0
GO:0009312	0.064	4	2	0	0	0	oligosaccharide biosynthetic process	0
GO:0009325	0.5799	3	3	3	1	1	nitrate reductase complex	0
GO:0009399	0.1742	6	4	1	0	0	nitrogen fixation	0
GO:0009401	0.0944	11	4	2	0	0	phosphoenolpyruvate-dependent sugar phosphotransferase system	0
GO:0009425	0.189	10	8	0	0	0	bacterial-type flagellum basal body	0
GO:0009451	0.0433	2	0	0	0	0	RNA modification	0
GO:0009521	0.2851	33	20	0	0	0	photosystem	0
GO:0009522	0.1271	8	0	0	0	0	photosystem I	0
GO:0009523	0.1864	17	1	1	0	0	photosystem II	0
GO:0009605	0.0346	3	0	0	0	0	response to external stimulus	0
GO:0009607	0.0688	5	4	4	2	0	response to biotic stimulus	0
GO:0009615	0.1181	5	5	4	2	0	response to virus	0
GO:0009653	0.0555	8	1	0	0	0	anatomical structure morphogenesis	0
GO:0009767	0.2053	4	0	0	0	0	photosynthetic electron transport chain	0
GO:0009847	0.0818	1	0	0	0	0	spore germination	0
GO:0009889	0.1282	813	7	4	4	3	regulation of biosynthetic process	0
GO:0009987	0.512	5472	5472	1900	819	208	cellular process	0
GO:0010181	0.0404	10	0	0	0	0	FMN binding	0
GO:0010383	0.1613	2	1	1	0	0	cell wall polysaccharide metabolic process	0
GO:0010410	0.1613	2	1	1	0	0	hemicellulose metabolic process	0
GO:0010467	0.209	1487	233	83	57	20	gene expression	0
GO:0010468	0.1286	840	8	4	4	3	regulation of gene expression	0
GO:0010556	0.1282	813	7	4	4	3	regulation of macromolecule biosynthetic process	0
GO:0010608	0.0225	1	1	1	0	0	posttranscriptional regulation of gene expression	0
GO:0015031	0.0501	17	0	0	0	0	protein transport	0
GO:0015075	0.0481	11	5	1	0	0	ion transmembrane transporter activity	0
GO:0015077	0.0484	7	5	5	2	1	monovalent inorganic cation transmembrane transporter activity	0
GO:0015078	0.0584	7	5	5	2	1	hydrogen ion transmembrane transporter activity	0
GO:0015079	0.0364	1	0	0	0	0	potassium ion transmembrane transporter activity	0
GO:0015098	0.2299	3	0	0	0	0	molybdate ion transmembrane transporter activity	0
GO:0015116	0.0983	2	0	0	0	0	sulfate transmembrane transporter activity	0
GO:0015144	0.0708	5	2	1	0	0	carbohydrate transmembrane transporter activity	0
GO:0015197	0.0661	1	0	0	0	0	peptide transporter activity	0
GO:0015235	0.1983	5	3	1	1	1	cobalamin transporter activity	0
GO:0015267	0.0673	5	0	0	0	0	channel activity	0
GO:0015288	0.09	6	0	0	0	0	porin activity	0
GO:0015291	0.0597	7	5	5	2	1	secondary active transmembrane transporter activity	0
GO:0015293	0.0475	4	2	2	1	1	symporter activity	0
GO:0015294	0.0499	4	2	2	1	1	solute:cation symporter activity	0
GO:0015295	0.0954	4	3	3	2	2	solute:hydrogen symporter activity	0
GO:0015399	0.0413	10	1	1	1	1	primary active transmembrane transporter activity	0
GO:0015405	0.0413	10	1	1	1	1	P-P-bond-hydrolysis-driven transmembrane transporter activity	0
GO:0015419	0.1284	2	0	0	0	0	sulfate transmembrane-transporting ATPase activity	0
GO:0015420	0.2147	5	3	1	1	1	cobalamin-transporting ATPase activity	0
GO:0015604	0.1198	1	0	0	0	0	organic phosphonate transmembrane transporter activity	0
GO:0015662	0.107	2	1	1	0	0	ATPase activity, coupled to transmembrane movement of ions, phosphorylative mechanism	0
GO:0015672	0.0866	13	11	10	8	5	monovalent inorganic cation transport	0
GO:0015689	0.2299	3	0	0	0	0	molybdate ion transport	0
GO:0015698	0.0577	4	3	3	3	1	inorganic anion transport	0
GO:0015716	0.1731	3	0	0	0	0	organic phosphonate transport	0
GO:0015734	0.4801	2	1	1	0	0	taurine transport	0
GO:0015774	0.0623	2	2	2	0	0	polysaccharide transport	0
GO:0015935	0.5573	7	1	0	0	0	small ribosomal subunit	0
GO:0015945	0.4184	3	2	2	1	1	methanol metabolic process	0
GO:0015946	0.4184	3	2	2	1	1	methanol oxidation	0
GO:0015980	0.0477	9	0	0	0	0	energy derivation by oxidation of organic compounds	0
GO:0015985	0.0637	4	3	0	0	0	energy coupled proton transport, down electrochemical gradient	0
GO:0015986	0.0637	4	3	0	0	0	ATP synthesis coupled proton transport	0
GO:0015988	0.0965	3	3	3	1	1	energy coupled proton transmembrane transport, against electrochemical gradient	0
GO:0015991	0.1038	3	3	3	1	1	ATP hydrolysis coupled proton transport	0
GO:0015992	0.0679	5	5	4	2	1	proton transport	0
GO:0015994	0.1046	4	3	0	0	0	chlorophyll metabolic process	0
GO:0015995	0.1104	4	3	0	0	0	chlorophyll biosynthetic process	0
GO:0016020	0.2948	3285	903	66	1	1	membrane	0
GO:0016021	0.1912	2108	76	17	3	0	integral component of membrane	0
GO:0016032	0.134	5	0	0	0	0	viral process	0
GO:0016043	0.0514	32	0	0	0	0	cellular component organization	0
GO:0016050	0.085	2	1	1	0	0	vesicle organization	0
GO:0016052	0.0308	4	1	0	0	0	carbohydrate catabolic process	0
GO:0016053	0.15	99	35	23	16	6	organic acid biosynthetic process	0
GO:0016070	0.1454	1183	15	6	5	3	RNA metabolic process	0
GO:0016072	0.0333	1	0	0	0	0	rRNA metabolic process	0
GO:0016114	0.0739	4	0	0	0	0	terpenoid biosynthetic process	0
GO:0016151	0.217	6	6	5	5	4	nickel cation binding	0
GO:0016168	0.3208	6	4	3	1	1	chlorophyll binding	0
GO:0016301	0.0491	11	7	2	0	0	kinase activity	0
GO:0016310	0.0498	11	6	2	0	0	phosphorylation	0
GO:0016405	0.1482	1	0	0	0	0	CoA-ligase activity	0
GO:0016462	0.102	161	24	9	0	0	pyrophosphatase activity	0
GO:0016469	0.0626	4	4	2	1	1	proton-transporting two-sector ATPase complex	0
GO:0016491	0.1728	852	125	4	0	0	oxidoreductase activity	0
GO:0016641	0.0359	1	0	0	0	0	oxidoreductase activity, acting on the CH-NH2 group of donors, oxygen as acceptor	0
GO:0016642	0.2501	2	1	1	1	1	oxidoreductase activity, acting on the CH-NH2 group of donors, disulfide as acceptor	0
GO:0016651	0.184	23	16	13	11	6	oxidoreductase activity, acting on NAD(P)H	0
GO:0016655	0.246	17	15	15	13	7	oxidoreductase activity, acting on NAD(P)H, quinone or similar compound as acceptor	0
GO:0016661	0.2139	5	3	3	1	1	oxidoreductase activity, acting on other nitrogenous compounds as donors	0
GO:0016695	0.1618	2	2	1	0	0	oxidoreductase activity, acting on hydrogen as donor	0
GO:0016699	0.246	3	2	1	0	0	oxidoreductase activity, acting on hydrogen as donor, iron-sulfur protein as acceptor	0
GO:0016701	0.0747	3	1	0	0	0	oxidoreductase activity, acting on single donors with incorporation of molecular oxygen	0
GO:0016702	0.0265	2	0	0	0	0	oxidoreductase activity, acting on single donors with incorporation of molecular oxygen, incorporation of two atoms of oxygen	0
GO:0016725	0.1041	2	0	0	0	0	oxidoreductase activity, acting on CH or CH2 groups	0
GO:0016730	0.0962	2	1	0	0	0	oxidoreductase activity, acting on iron-sulfur proteins as donors	0
GO:0016740	0.2333	2337	419	8	0	0	transferase activity	0
GO:0016741	0.1017	98	34	16	1	0	transferase activity, transferring one-carbon groups	0
GO:0016757	0.0367	4	0	0	0	0	transferase activity, transferring glycosyl groups	0
GO:0016772	0.0815	83	10	9	6	0	transferase activity, transferring phosphorus-containing groups	0
GO:0016773	0.0326	10	0	0	0	0	phosphotransferase activity, alcohol group as acceptor	0
GO:0016775	0.0239	3	0	0	0	0	phosphotransferase activity, nitrogenous group as acceptor	0
GO:0016782	0.0128	1	1	1	1	1	transferase activity, transferring sulfur-containing groups	0
GO:0016787	0.2435	2641	345	0	0	0	hydrolase activity	0
GO:0016788	0.0742	38	7	4	4	3	hydrolase activity, acting on ester bonds	0
GO:0016798	0.0424	13	0	0	0	0	hydrolase activity, acting on glycosyl bonds	0
GO:0016814	0.0207	1	0	0	0	0	hydrolase activity, acting on carbon-nitrogen (but not peptide) bonds, in cyclic amidines	0
GO:0016817	0.1014	164	24	11	0	0	hydrolase activity, acting on acid anhydrides	0
GO:0016818	0.1021	162	24	11	0	0	hydrolase activity, acting on acid anhydrides, in phosphorus-containing anhydrides	0
GO:0016820	0.0435	9	1	1	1	1	hydrolase activity, acting on acid anhydrides, catalyzing transmembrane movement of substances	0
GO:0016829	0.0747	65	6	0	0	0	lyase activity	0
GO:0016835	0.0524	9	3	1	0	0	carbon-oxygen lyase activity	0
GO:0016836	0.0769	10	4	3	0	0	hydro-lyase activity	0
GO:0016840	0.0316	1	1	1	0	0	carbon-nitrogen lyase activity	0
GO:0016841	0.0881	2	1	1	1	1	ammonia-lyase activity	0
GO:0016849	0.0387	3	2	1	0	0	phosphorus-oxygen lyase activity	0
GO:0016853	0.0369	5	1	1	0	0	isomerase activity	0
GO:0016854	0.0378	2	1	0	0	0	racemase and epimerase activity	0
GO:0016857	0.0382	2	2	0	0	0	racemase and epimerase activity, acting on carbohydrates and derivatives	0
GO:0016874	0.1146	50	23	12	5	2	ligase activity	0
GO:0016875	0.174	15	13	11	3	2	ligase activity, forming carbon-oxygen bonds	0
GO:0016876	0.174	15	13	11	3	2	ligase activity, forming aminoacyl-tRNA and related compounds	0
GO:0016887	0.0574	16	4	2	1	1	ATPase activity	0
GO:0016903	0.0291	1	0	0	0	0	oxidoreductase activity, acting on the aldehyde or oxo group of donors	0
GO:0017004	0.0118	1	0	0	0	0	cytochrome complex assembly	0
GO:0017076	0.1624	577	134	34	3	3	purine nucleotide binding	0
GO:0017111	0.0995	145	24	9	0	0	nucleoside-triphosphatase activity	0
GO:0017171	0.0255	2	2	2	1	1	serine hydrolase activity	0
GO:0018130	0.1785	1496	126	42	25	6	heterocycle biosynthetic process	0
GO:0018298	0.3916	13	10	7	2	1	protein-chromophore linkage	0
GO:0018492	0.2519	2	0	0	0	0	carbon-monoxide dehydrogenase (acceptor) activity	0
GO:0018662	0.1267	1	1	1	1	1	phenol 2-monooxygenase activity	0
GO:0018822	0.0692	2	2	2	2	2	nitrile hydratase activity	0
GO:0019012	0.1172	13	9	7	6	4	virion	0
GO:0019015	0.3784	12	12	9	6	5	viral genome	0
GO:0019038	0.3784	12	12	9	6	5	provirus	0
GO:0019058	0.0944	2	2	1	0	0	viral life cycle	0
GO:0019068	0.1293	2	2	1	0	0	virion assembly	0
GO:0019069	0.1929	2	2	1	0	0	viral capsid assembly	0
GO:0019219	0.1274	838	7	4	4	3	regulation of nucleobase-containing compound metabolic process	0
GO:0019222	0.132	946	7	4	4	3	regulation of metabolic process	0
GO:0019288	0.3197	4	4	1	0	0	isopentenyl diphosphate biosynthetic process, methylerythritol 4-phosphate pathway	0
GO:0019318	0.0246	1	0	0	0	0	hexose metabolic process	0
GO:0019438	0.1732	1466	128	29	7	5	aromatic compound biosynthetic process	0
GO:0019464	0.1898	2	1	1	1	1	glycine decarboxylation via glycine cleavage system	0
GO:0019509	0.0966	2	2	2	2	2	L-methionine salvage from methylthioadenosine	0
GO:0019538	0.1781	375	128	77	51	17	protein metabolic process	0
GO:0019545	0.2025	1	0	0	0	0	arginine catabolic process to succinate	0
GO:0019627	0.3736	4	4	1	0	0	urea metabolic process	0
GO:0019634	0.4965	6	6	5	0	0	organic phosphonate metabolic process	0
GO:0019637	0.1372	257	35	13	11	8	organophosphate metabolic process	0
GO:0019682	0.3197	4	4	1	0	0	glyceraldehyde-3-phosphate metabolic process	0
GO:0019684	0.1465	12	1	1	1	1	photosynthesis, light reaction	0
GO:0019693	0.0893	82	0	0	0	0	ribose phosphate metabolic process	0
GO:0019700	0.3255	2	0	0	0	0	organic phosphonate catabolic process	0
GO:0019720	0.2405	4	4	4	0	0	Mo-molybdopterin cofactor metabolic process	0
GO:0019752	0.1877	219	83	50	2	2	carboxylic acid metabolic process	0
GO:0019829	0.0738	4	3	0	0	0	cation-transporting ATPase activity	0
GO:0019843	0.3511	37	27	23	21	6	rRNA binding	0
GO:0020037	0.0261	1	0	0	0	0	heme binding	0
GO:0022402	0.0398	3	3	1	0	0	cell cycle process	0
GO:0022603	0.0836	5	3	0	0	0	regulation of anatomical structure morphogenesis	0
GO:0022604	0.0854	5	3	0	0	0	regulation of cell morphogenesis	0
GO:0022607	0.0301	2	0	0	0	0	cellular component assembly	0
GO:0022613	0.0426	1	0	0	0	0	ribonucleoprotein complex biogenesis	0
GO:0022803	0.0673	5	0	0	0	0	passive transmembrane transporter activity	0
GO:0022804	0.0519	16	5	2	1	1	active transmembrane transporter activity	0
GO:0022829	0.09	6	0	0	0	0	wide pore channel activity	0
GO:0022857	0.0727	63	5	5	2	2	transmembrane transporter activity	0
GO:0022890	0.0443	7	5	5	2	1	inorganic cation transmembrane transporter activity	0
GO:0022891	0.0558	27	0	0	0	0	substrate-specific transmembrane transporter activity	0
GO:0022892	0.0647	23	0	0	0	0	substrate-specific transporter activity	0
GO:0022900	0.0729	16	4	3	1	0	electron transport chain	0
GO:0022904	0.0235	3	0	0	0	0	respiratory electron transport chain	0
GO:0023014	0.0299	3	0	0	0	0	signal transduction by phosphorylation	0
GO:0023052	0.0584	32	8	5	4	4	signaling	0
GO:0030001	0.0687	8	7	6	6	5	metal ion transport	0
GO:0030030	0.0535	7	0	0	0	0	cell projection organization	0
GO:0030031	0.0306	4	0	0	0	0	cell projection assembly	0
GO:0030076	0.345	19	18	9	6	1	light-harvesting complex	0
GO:0030077	0.1509	4	2	0	0	0	plasma membrane light-harvesting complex	0
GO:0030203	0.0394	5	1	0	0	0	glycosaminoglycan metabolic process	0
GO:0030246	0.0231	1	1	1	1	1	carbohydrate binding	0
GO:0030260	0.0404	1	0	0	0	0	entry into host cell	0
GO:0030261	0.0378	1	0	0	0	0	chromosome condensation	0
GO:0030312	0.0401	4	4	4	1	0	external encapsulating structure	0
GO:0030313	0.0381	5	4	4	1	0	cell envelope	0
GO:0030493	0.3387	3	0	0	0	0	bacteriochlorophyll metabolic process	0
GO:0030494	0.3387	3	0	0	0	0	bacteriochlorophyll biosynthetic process	0
GO:0030529	0.2718	92	64	52	36	15	ribonucleoprotein complex	0
GO:0030554	0.1472	438	66	8	2	0	adenyl nucleotide binding	0
GO:0030694	0.4068	4	0	0	0	0	bacterial-type flagellum basal body, rod	0
GO:0031224	0.1915	2110	78	17	3	0	intrinsic component of membrane	0
GO:0031323	0.1275	869	7	4	4	3	regulation of cellular metabolic process	0
GO:0031326	0.1282	813	7	4	4	3	regulation of cellular biosynthetic process	0
GO:0031410	0.1265	8	1	0	0	0	cytoplasmic vesicle	0
GO:0031411	0.2709	4	0	0	0	0	gas vesicle	0
GO:0031412	0.0947	2	1	1	0	0	gas vesicle organization	0
GO:0031975	0.0379	5	4	4	1	0	envelope	0
GO:0031982	0.0977	8	1	0	0	0	vesicle	0
GO:0032259	0.1032	85	36	12	2	1	methylation	0
GO:0032268	0.021	1	1	1	0	0	regulation of cellular protein metabolic process	0
GO:0032324	0.2405	4	4	4	0	0	molybdopterin cofactor biosynthetic process	0
GO:0032392	0.1573	2	0	0	0	0	DNA geometric change	0
GO:0032502	0.0544	15	0	0	0	0	developmental process	0
GO:0032506	0.0578	4	3	1	0	0	cytokinetic process	0
GO:0032508	0.1573	2	0	0	0	0	DNA duplex unwinding	0
GO:0032549	0.162	504	123	34	3	3	ribonucleoside binding	0
GO:0032550	0.1613	503	127	33	3	3	purine ribonucleoside binding	0
GO:0032553	0.1623	632	132	32	3	3	ribonucleotide binding	0
GO:0032555	0.1596	549	127	33	3	3	purine ribonucleotide binding	0
GO:0032559	0.1454	413	63	8	2	0	adenyl ribonucleotide binding	0
GO:0032774	0.1301	875	5	4	4	3	RNA biosynthetic process	0
GO:0032787	0.0528	10	5	2	2	2	monocarboxylic acid metabolic process	0
GO:0032940	0.0407	4	0	0	0	0	secretion by cell	0
GO:0032989	0.0846	8	1	0	0	0	cellular component morphogenesis	0
GO:0032991	0.2174	253	142	101	38	14	macromolecular complex	0
GO:0033013	0.1832	25	21	19	12	6	tetrapyrrole metabolic process	0
GO:0033014	0.1946	23	21	19	12	6	tetrapyrrole biosynthetic process	0
GO:0033036	0.0505	17	0	0	0	0	macromolecule localization	0
GO:0033037	0.0623	2	2	2	0	0	polysaccharide localization	0
GO:0033178	0.0909	3	1	0	0	0	proton-transporting two-sector ATPase complex, catalytic domain	0
GO:0033554	0.0425	5	0	0	0	0	cellular response to stress	0
GO:0033692	0.0702	8	6	4	2	1	cellular polysaccharide biosynthetic process	0
GO:0033988	0.0519	1	0	0	0	0	bile-acid 7alpha-dehydratase activity	0
GO:0034220	0.0634	8	7	6	0	0	ion transmembrane transport	0
GO:0034308	0.4184	3	2	2	1	1	primary alcohol metabolic process	0
GO:0034470	0.066	14	0	0	0	0	ncRNA processing	0
GO:0034622	0.009	1	0	0	0	0	cellular macromolecular complex assembly	0
GO:0034637	0.0654	8	4	4	2	1	cellular carbohydrate biosynthetic process	0
GO:0034641	0.2954	2673	836	266	33	8	cellular nitrogen compound metabolic process	0
GO:0034645	0.2064	1572	208	86	46	23	cellular macromolecule biosynthetic process	0
GO:0034654	0.1418	1159	8	3	0	0	nucleobase-containing compound biosynthetic process	0
GO:0034660	0.1165	53	15	7	5	3	ncRNA metabolic process	0
GO:0035383	0.1366	5	0	0	0	0	thioester metabolic process	0
GO:0035435	0.4122	2	2	1	0	0	phosphate ion transmembrane transport	0
GO:0035556	0.0525	14	4	4	1	0	intracellular signal transduction	0
GO:0035639	0.162	503	127	33	3	3	purine ribonucleoside triphosphate binding	0
GO:0036094	0.1975	1457	277	39	4	1	small molecule binding	0
GO:0036211	0.0703	21	14	12	4	0	protein modification process	0
GO:0038023	0.0397	4	0	0	0	0	signaling receptor activity	0
GO:0040011	0.1249	20	16	3	0	0	locomotion	0
GO:0042126	0.2286	2	2	1	0	0	nitrate metabolic process	0
GO:0042168	0.0662	2	2	1	1	1	heme metabolic process	0
GO:0042221	0.0213	1	0	0	0	0	response to chemical	0
GO:0042254	0.0426	1	0	0	0	0	ribosome biogenesis	0
GO:0042278	0.0533	3	0	0	0	0	purine nucleoside metabolic process	0
GO:0042330	0.0458	3	0	0	0	0	taxis	0
GO:0042364	0.2153	34	19	18	15	14	water-soluble vitamin biosynthetic process	0
GO:0042401	0.0892	3	1	0	0	0	cellular biogenic amine biosynthetic process	0
GO:0042430	0.0735	3	0	0	0	0	indole-containing compound metabolic process	0
GO:0042435	0.1654	3	1	0	0	0	indole-containing compound biosynthetic process	0
GO:0042440	0.0913	5	3	0	0	0	pigment metabolic process	0
GO:0042451	0.0397	3	0	0	0	0	purine nucleoside biosynthetic process	0
GO:0042455	0.0484	1	0	0	0	0	ribonucleoside biosynthetic process	0
GO:0042546	0.1157	5	1	0	0	0	cell wall biogenesis	0
GO:0042623	0.0511	15	5	1	1	1	ATPase activity, coupled	0
GO:0042625	0.0603	4	2	0	0	0	ATPase activity, coupled to transmembrane movement of ions	0
GO:0042626	0.0464	9	1	1	1	1	ATPase activity, coupled to transmembrane movement of substances	0
GO:0042651	0.3599	56	39	18	8	1	thylakoid membrane	0
GO:0042716	0.1509	4	2	0	0	0	plasma membrane-derived chromatophore	0
GO:0042723	0.078	3	2	1	0	0	thiamine-containing compound metabolic process	0
GO:0042724	0.0907	3	2	1	0	0	thiamine-containing compound biosynthetic process	0
GO:0042777	0.1213	4	3	0	0	0	plasma membrane ATP synthesis coupled proton transport	0
GO:0042995	0.0951	12	11	8	0	0	cell projection	0
GO:0043038	0.2775	15	12	10	3	2	amino acid activation	0
GO:0043039	0.2775	15	12	10	3	2	tRNA aminoacylation	0
GO:0043094	0.029	2	2	2	2	2	cellular metabolic compound salvage	0
GO:0043102	0.0966	2	2	2	2	2	amino acid salvage	0
GO:0043167	0.2811	2305	823	177	31	0	ion binding	0
GO:0043168	0.1975	846	205	59	3	2	anion binding	0
GO:0043169	0.148	982	8	3	3	2	cation binding	0
GO:0043170	0.3149	3106	1144	273	112	9	macromolecule metabolic process	0
GO:0043226	0.2052	132	88	63	40	13	organelle	0
GO:0043228	0.2176	131	85	63	40	13	non-membrane-bounded organelle	0
GO:0043229	0.2076	132	88	63	40	13	intracellular organelle	0
GO:0043232	0.2176	131	85	63	40	13	intracellular non-membrane-bounded organelle	0
GO:0043234	0.1273	76	47	30	4	1	protein complex	0
GO:0043412	0.0738	48	14	11	4	0	macromolecule modification	0
GO:0043419	0.6161	3	1	0	0	0	urea catabolic process	0
GO:0043436	0.1881	222	83	50	2	2	oxoacid metabolic process	0
GO:0043492	0.0464	9	1	1	1	1	ATPase activity, coupled to movement of substances	0
GO:0043545	0.2405	4	4	4	0	0	molybdopterin cofactor metabolic process	0
GO:0043570	0.0327	2	2	2	2	2	maintenance of DNA repeat elements	0
GO:0043571	0.0327	2	2	2	2	2	maintenance of CRISPR repeat elements	0
GO:0043603	0.0562	10	0	0	0	0	cellular amide metabolic process	0
GO:0043604	0.0212	2	0	0	0	0	amide biosynthetic process	0
GO:0043605	0.2146	5	0	0	0	0	cellular amide catabolic process	0
GO:0043623	0.0086	1	0	0	0	0	cellular protein complex assembly	0
GO:0043711	0.1816	4	0	0	0	0	pilus organization	0
GO:0044036	0.0365	5	1	0	0	0	cell wall macromolecule metabolic process	0
GO:0044038	0.1249	5	1	0	0	0	cell wall macromolecule biosynthetic process	0
GO:0044042	0.0879	3	0	0	0	0	glucan metabolic process	0
GO:0044085	0.0653	24	6	0	0	0	cellular component biogenesis	0
GO:0044106	0.0335	2	0	0	0	0	cellular amine metabolic process	0
GO:0044237	0.4599	4291	4265	1322	677	80	cellular metabolic process	0
GO:0044238	0.429	4196	3944	957	447	34	primary metabolic process	0
GO:0044248	0.0565	4	0	0	0	0	cellular catabolic process	0
GO:0044249	0.3112	2322	771	399	199	55	cellular biosynthetic process	0
GO:0044255	0.0774	35	14	3	0	0	cellular lipid metabolic process	0
GO:0044260	0.2871	2533	738	254	103	10	cellular macromolecule metabolic process	0
GO:0044262	0.0579	13	4	4	2	1	cellular carbohydrate metabolic process	0
GO:0044264	0.062	9	4	4	2	1	cellular polysaccharide metabolic process	0
GO:0044267	0.2115	247	115	79	50	17	cellular protein metabolic process	0
GO:0044270	0.0503	3	0	0	0	0	cellular nitrogen compound catabolic process	0
GO:0044271	0.1694	1499	80	28	16	7	cellular nitrogen compound biosynthetic process	0
GO:0044272	0.0553	7	3	0	0	0	sulfur compound biosynthetic process	0
GO:0044281	0.2664	774	347	175	65	8	small molecule metabolic process	0
GO:0044283	0.2078	157	75	44	36	22	small molecule biosynthetic process	0
GO:0044391	0.2299	13	9	2	1	1	ribosomal subunit	0
GO:0044403	0.0336	5	0	0	0	0	symbiosis, encompassing mutualism through parasitism	0
GO:0044409	0.0404	1	0	0	0	0	entry into host	0
GO:0044419	0.0336	5	0	0	0	0	interspecies interaction between organisms	0
GO:0044422	0.1528	45	29	2	0	0	organelle part	0
GO:0044423	0.1192	13	9	7	6	4	virion part	0
GO:0044424	0.2923	998	445	265	104	24	intracellular part	0
GO:0044425	0.2114	2198	192	57	5	1	membrane part	0
GO:0044427	0.1872	13	6	6	5	4	chromosomal part	0
GO:0044433	0.1465	4	2	0	0	0	cytoplasmic vesicle part	0
GO:0044436	0.41	66	49	40	2	1	thylakoid part	0
GO:0044444	0.2267	110	68	54	37	16	cytoplasmic part	0
GO:0044446	0.1398	31	15	2	1	1	intracellular organelle part	0
GO:0044461	0.2002	12	11	8	0	0	bacterial-type flagellum part	0
GO:0044463	0.2002	12	11	8	0	0	cell projection part	0
GO:0044464	0.306	2459	927	361	127	36	cell part	0
GO:0044699	0.4307	4250	4179	1199	281	35	single-organism process	0
GO:0044700	0.0584	32	8	5	4	4	single organism signaling	0
GO:0044710	0.3649	2716	1401	677	134	14	single-organism metabolic process	0
GO:0044711	0.2295	485	241	121	76	8	single-organism biosynthetic process	0
GO:0044712	0.0646	40	0	0	0	0	single-organism catabolic process	0
GO:0044723	0.0621	23	7	7	4	1	single-organism carbohydrate metabolic process	0
GO:0044763	0.3381	2942	1191	525	170	23	single-organism cellular process	0
GO:0044764	0.0214	1	0	0	0	0	multi-organism cellular process	0
GO:0044765	0.1066	325	15	9	8	8	single-organism transport	0
GO:0044767	0.0501	8	1	0	0	0	single-organism developmental process	0
GO:0044769	0.0948	4	3	0	0	0	ATPase activity, coupled to transmembrane movement of ions, rotational mechanism	0
GO:0044781	0.0192	1	0	0	0	0	bacterial-type flagellum organization	0
GO:0045156	0.1356	5	2	0	0	0	electron transporter, transferring electrons within the cyclic electron transport pathway of photosynthesis activity	0
GO:0045184	0.0512	16	0	0	0	0	establishment of protein localization	0
GO:0045259	0.0118	1	0	0	0	0	proton-transporting ATP synthase complex	0
GO:0045261	0.0177	1	0	0	0	0	proton-transporting ATP synthase complex, catalytic core F(1)	0
GO:0045333	0.0475	10	0	0	0	0	cellular respiration	0
GO:0045491	0.1613	2	1	1	0	0	xylan metabolic process	0
GO:0045493	0.1613	2	1	1	0	0	xylan catabolic process	0
GO:0046128	0.0537	3	0	0	0	0	purine ribonucleoside metabolic process	0
GO:0046129	0.0397	3	0	0	0	0	purine ribonucleoside biosynthetic process	0
GO:0046148	0.1054	5	4	0	0	0	pigment biosynthetic process	0
GO:0046219	0.1654	3	1	0	0	0	indolalkylamine biosynthetic process	0
GO:0046390	0.0701	17	0	0	0	0	ribose phosphate biosynthetic process	0
GO:0046394	0.1509	99	35	23	16	6	carboxylic acid biosynthetic process	0
GO:0046434	0.0496	4	4	1	0	0	organophosphate catabolic process	0
GO:0046467	0.1075	3	2	0	0	0	membrane lipid biosynthetic process	0
GO:0046483	0.2976	2652	816	294	38	9	heterocycle metabolic process	0
GO:0046490	0.3197	4	4	1	0	0	isopentenyl diphosphate metabolic process	0
GO:0046493	0.1412	3	2	0	0	0	lipid A metabolic process	0
GO:0046501	0.1304	2	0	0	0	0	protoporphyrinogen IX metabolic process	0
GO:0046559	0.4131	2	1	1	0	0	alpha-glucuronidase activity	0
GO:0046821	0.0181	1	0	0	0	0	extrachromosomal DNA	0
GO:0046872	0.1454	957	14	3	2	2	metal ion binding	0
GO:0046903	0.046	17	1	1	0	0	secretion	0
GO:0046906	0.0517	14	7	3	1	1	tetrapyrrole binding	0
GO:0046914	0.0719	25	8	7	4	3	transition metal ion binding	0
GO:0046933	0.1011	4	3	0	0	0	proton-transporting ATP synthase activity, rotational mechanism	0
GO:0046992	0.3267	3	3	2	0	0	oxidoreductase activity, acting on X-H and Y-H to form an X-Y bond	0
GO:0048037	0.0809	75	6	5	1	1	cofactor binding	0
GO:0048038	0.1207	9	6	6	5	1	quinone binding	0
GO:0048856	0.054	8	1	0	0	0	anatomical structure development	0
GO:0048869	0.0534	8	1	0	0	0	cellular developmental process	0
GO:0050136	0.2124	10	9	9	7	2	NADH dehydrogenase (quinone) activity	0
GO:0050485	0.3267	3	3	2	0	0	oxidoreductase activity, acting on X-H and Y-H to form an X-Y bond, with a disulfide as acceptor	0
GO:0050789	0.157	1471	22	9	7	1	regulation of biological process	0
GO:0050793	0.0796	5	3	0	0	0	regulation of developmental process	0
GO:0050794	0.1517	1378	22	9	7	1	regulation of cellular process	0
GO:0050896	0.0876	113	7	4	4	4	response to stimulus	0
GO:0051119	0.0901	4	3	3	2	2	sugar transmembrane transporter activity	0
GO:0051128	0.0495	5	2	0	0	0	regulation of cellular component organization	0
GO:0051171	0.1274	838	7	4	4	3	regulation of nitrogen compound metabolic process	0
GO:0051179	0.1828	1594	109	34	24	21	localization	0
GO:0051183	0.1352	5	3	1	1	1	vitamin transporter activity	0
GO:0051186	0.0856	81	0	0	0	0	cofactor metabolic process	0
GO:0051188	0.0904	51	0	0	0	0	cofactor biosynthetic process	0
GO:0051189	0.2115	4	4	4	0	0	prosthetic group metabolic process	0
GO:0051213	0.0468	10	0	0	0	0	dioxygenase activity	0
GO:0051234	0.1617	1525	53	20	10	10	establishment of localization	0
GO:0051246	0.021	1	1	1	0	0	regulation of protein metabolic process	0
GO:0051252	0.1293	782	7	4	4	3	regulation of RNA metabolic process	0
GO:0051276	0.0489	3	2	2	2	2	chromosome organization	0
GO:0051301	0.0357	8	0	0	0	0	cell division	0
GO:0051302	0.182	2	1	0	0	0	regulation of cell division	0
GO:0051536	0.0699	36	6	3	2	2	iron-sulfur cluster binding	0
GO:0051539	0.0422	3	1	1	1	1	4 iron, 4 sulfur cluster binding	0
GO:0051540	0.0696	36	6	3	2	2	metal cluster binding	0
GO:0051607	0.1383	5	5	4	2	0	defense response to virus	0
GO:0051641	0.0435	10	0	0	0	0	cellular localization	0
GO:0051649	0.0434	17	0	0	0	0	establishment of localization in cell	0
GO:0051674	0.1472	16	14	5	0	0	localization of cell	0
GO:0051701	0.0174	1	0	0	0	0	interaction with host	0
GO:0051704	0.0788	60	11	3	0	0	multi-organism process	0
GO:0051707	0.0714	5	4	4	2	0	response to other organism	0
GO:0051716	0.0645	62	10	4	4	4	cellular response to stimulus	0
GO:0051726	0.3352	2	1	0	0	0	regulation of cell cycle	0
GO:0051806	0.0404	1	0	0	0	0	entry into cell of other organism involved in symbiotic interaction	0
GO:0051828	0.0404	1	0	0	0	0	entry into other organism involved in symbiotic interaction	0
GO:0052126	0.0404	1	0	0	0	0	movement in host environment	0
GO:0052192	0.0404	1	0	0	0	0	movement in environment of other organism involved in symbiotic interaction	0
GO:0052636	0.5879	2	0	0	0	0	arabinosyltransferase activity	0
GO:0052689	0.0126	1	1	0	0	0	carboxylic ester hydrolase activity	0
GO:0052803	0.1818	5	4	4	1	0	imidazole-containing compound metabolic process	0
GO:0055085	0.0534	9	4	4	1	0	transmembrane transport	0
GO:0055086	0.1033	191	6	0	0	0	nucleobase-containing small molecule metabolic process	0
GO:0055114	0.1889	778	192	55	0	0	oxidation-reduction process	0
GO:0060089	0.0549	28	6	2	0	0	molecular transducer activity	0
GO:0060255	0.13	876	7	4	4	3	regulation of macromolecule metabolic process	0
GO:0061505	0.1382	2	0	0	0	0	DNA topoisomerase II activity	0
GO:0065007	0.1581	1503	23	9	7	1	biological regulation	0
GO:0065008	0.0367	7	2	0	0	0	regulation of biological quality	0
GO:0070011	0.0307	3	0	0	0	0	peptidase activity, acting on L-amino acid peptides	0
GO:0070589	0.1249	5	1	0	0	0	cellular component macromolecule biosynthetic process	0
GO:0071103	0.0254	2	0	0	0	0	DNA conformation change	0
GO:0071265	0.0419	2	2	2	2	2	L-methionine biosynthetic process	0
GO:0071267	0.0966	2	2	2	2	2	L-methionine salvage	0
GO:0071554	0.0345	5	1	0	0	0	cell wall organization or biogenesis	0
GO:0071702	0.0619	34	4	0	0	0	organic substance transport	0
GO:0071704	0.4688	4632	4632	1401	686	80	organic substance metabolic process	0
GO:0071766	0.5879	2	0	0	0	0	Actinobacterium-type cell wall biogenesis	0
GO:0071840	0.0724	65	1	0	0	0	cellular component organization or biogenesis	0
GO:0071941	0.1415	11	3	0	0	0	nitrogen cycle metabolic process	0
GO:0071944	0.1194	344	46	27	23	13	cell periphery	0
GO:0072348	0.051	1	0	0	0	0	sulfur compound transport	0
GO:0072521	0.0713	71	0	0	0	0	purine-containing compound metabolic process	0
GO:0072522	0.0677	12	0	0	0	0	purine-containing compound biosynthetic process	0
GO:0072527	0.0192	1	1	0	0	0	pyrimidine-containing compound metabolic process	0
GO:0072528	0.0176	1	1	0	0	0	pyrimidine-containing compound biosynthetic process	0
GO:0080090	0.1289	863	7	4	4	3	regulation of primary metabolic process	0
GO:0080109	0.1514	2	2	2	2	2	indole-3-acetonitrile nitrile hydratase activity	0
GO:0090304	0.2208	1981	271	41	5	2	nucleic acid metabolic process	0
GO:0090305	0.0251	1	0	0	0	0	nucleic acid phosphodiester bond hydrolysis	0
GO:0090407	0.1038	113	5	3	1	0	organophosphate biosynthetic process	0
GO:0090482	0.184	5	3	1	1	1	vitamin transmembrane transporter activity	0
GO:0090529	0.0578	4	3	1	0	0	cell septum assembly	0
GO:0097159	0.3575	3642	2630	293	88	12	organic cyclic compound binding	0
GO:0097367	0.1621	633	121	33	3	3	carbohydrate derivative binding	0
GO:0098542	0.0912	5	5	4	2	0	defense response to other organism	0
GO:1901135	0.1069	217	6	2	1	1	carbohydrate derivative metabolic process	0
GO:1901137	0.0921	76	4	3	0	0	carbohydrate derivative biosynthetic process	0
GO:1901265	0.188	1219	221	44	6	2	nucleoside phosphate binding	0
GO:1901269	0.1412	3	2	0	0	0	lipooligosaccharide metabolic process	0
GO:1901271	0.1412	3	2	0	0	0	lipooligosaccharide biosynthetic process	0
GO:1901293	0.0689	52	0	0	0	0	nucleoside phosphate biosynthetic process	0
GO:1901360	0.3032	2680	847	354	23	8	organic cyclic compound metabolic process	0
GO:1901362	0.1853	1518	174	51	16	9	organic cyclic compound biosynthetic process	0
GO:1901363	0.3567	3622	2599	292	88	12	heterocyclic compound binding	0
GO:1901476	0.0708	5	2	1	0	0	carbohydrate transporter activity	0
GO:1901564	0.2669	699	342	167	76	13	organonitrogen compound metabolic process	0
GO:1901565	0.0476	4	0	0	0	0	organonitrogen compound catabolic process	0
GO:1901566	0.2641	309	168	102	65	12	organonitrogen compound biosynthetic process	0
GO:1901575	0.0795	62	10	0	0	0	organic substance catabolic process	0
GO:1901576	0.3115	2401	804	406	202	51	organic substance biosynthetic process	0
GO:1901605	0.1444	89	28	13	10	6	alpha-amino acid metabolic process	0
GO:1901607	0.1697	53	28	17	9	8	alpha-amino acid biosynthetic process	0
GO:1901657	0.0675	60	0	0	0	0	glycosyl compound metabolic process	0
GO:1901677	0.3082	3	3	3	2	1	phosphate transmembrane transporter activity	0
GO:1902494	0.0271	2	2	1	0	0	catalytic complex	0
GO:1902589	0.0531	3	2	2	2	2	single-organism organelle organization	0
GO:1990204	0.0834	2	2	1	0	0	oxidoreductase complex	0
GO:2000112	0.1283	813	7	4	4	3	regulation of cellular macromolecule biosynthetic process	0
GO:2001057	0.2286	2	2	1	0	0	reactive nitrogen species metabolic process	0
GO:2001141	0.1291	778	7	4	4	3	regulation of RNA biosynthetic process	0

## Sheet: MPP-H__known_predictions
		# of gene families for which a GO term is predicted at Precision≥X%
GO term	AUPRC	0.1	0.3	0.5	0.7	0.9	Description	Highlighted in paper
GO:0009405	0.1252	35	32	19	7	6	pathogenesis	1
GO:0015948	0.4856	15	13	11	2	0	methanogenesis	1
GO:0016051	0.0692	18	8	6	0	0	carbohydrate biosynthetic process	1		total COG/NOG gene families analyzed in MPP-H
GO:0032196	0.064	12	5	4	2	2	transposition	1		9556
GO:0034357	0.1416	13	13	13	13	12	photosynthetic membrane	1
GO:0048870	0.1759	19	16	7	0	0	cell motility	1
GO:0000049	0.0414	4	0	0	0	0	tRNA binding	0
GO:0000105	0.4774	7	7	7	7	2	histidine biosynthetic process	0
GO:0000107	0.7796	2	0	0	0	0	imidazoleglycerol-phosphate synthase activity	0
GO:0000154	0.0805	1	0	0	0	0	rRNA modification	0
GO:0000160	0.0239	6	0	0	0	0	phosphorelay signal transduction system	0
GO:0000162	0.3052	3	2	2	0	0	tryptophan biosynthetic process	0
GO:0000166	0.225	1086	245	133	62	12	nucleotide binding	0
GO:0000270	0.0638	9	0	0	0	0	peptidoglycan metabolic process	0
GO:0000271	0.0309	4	1	1	0	0	polysaccharide biosynthetic process	0
GO:0000413	0.017	2	2	0	0	0	protein peptidyl-prolyl isomerization	0
GO:0000502	0.1997	3	1	1	1	1	proteasome complex	0
GO:0000746	0.1815	8	7	5	0	0	conjugation	0
GO:0000902	0.0854	10	4	0	0	0	cell morphogenesis	0
GO:0000910	0.0109	1	0	0	0	0	cytokinesis	0
GO:0000917	0.0132	1	1	0	0	0	barrier septum assembly	0
GO:0001071	0.0406	15	0	0	0	0	nucleic acid binding transcription factor activity	0
GO:0001510	0.0623	2	1	1	0	0	RNA methylation	0
GO:0001514	0.5235	2	1	1	1	1	selenocysteine incorporation	0
GO:0001539	0.1783	19	16	7	0	0	ciliary or bacterial-type flagellar motility	0
GO:0001682	0.0989	1	0	0	0	0	tRNA 5'-leader removal	0
GO:0001882	0.2198	687	202	111	57	9	nucleoside binding	0
GO:0001883	0.2194	671	197	109	57	9	purine nucleoside binding	0
GO:0002161	0.2283	2	2	1	0	0	aminoacyl-tRNA editing activity	0
GO:0002252	0.114	4	4	4	3	2	immune effector process	0
GO:0002376	0.1014	4	4	4	3	2	immune system process	0
GO:0003333	0.0198	1	0	0	0	0	amino acid transmembrane transport	0
GO:0003676	0.2597	1613	646	123	31	13	nucleic acid binding	0
GO:0003677	0.1771	1177	65	0	0	0	DNA binding	0
GO:0003700	0.0406	13	0	0	0	0	sequence-specific DNA binding transcription factor activity	0
GO:0003723	0.2036	128	67	41	32	13	RNA binding	0
GO:0003735	0.352	83	61	53	42	32	structural constituent of ribosome	0
GO:0003755	0.017	2	2	0	0	0	peptidyl-prolyl cis-trans isomerase activity	0
GO:0003774	0.1767	11	9	7	0	0	motor activity	0
GO:0003824	0.6443	5229	5229	5229	1937	91	catalytic activity	0
GO:0003896	0.0491	1	0	0	0	0	DNA primase activity	0
GO:0003899	0.0497	2	0	0	0	0	DNA-directed RNA polymerase activity	0
GO:0003916	0.0275	2	1	1	1	1	DNA topoisomerase activity	0
GO:0003918	0.1119	2	1	1	0	0	DNA topoisomerase type II (ATP-hydrolyzing) activity	0
GO:0003924	0.0521	3	0	0	0	0	GTPase activity	0
GO:0003954	0.1932	10	7	7	7	5	NADH dehydrogenase activity	0
GO:0004386	0.033	2	0	0	0	0	helicase activity	0
GO:0004518	0.1263	126	36	29	24	20	nuclease activity	0
GO:0004519	0.1168	54	28	24	16	3	endonuclease activity	0
GO:0004526	0.0166	1	0	0	0	0	ribonuclease P activity	0
GO:0004527	0.1965	38	28	28	24	20	exonuclease activity	0
GO:0004540	0.0151	2	0	0	0	0	ribonuclease activity	0
GO:0004553	0.0886	49	9	0	0	0	hydrolase activity, hydrolyzing O-glycosyl compounds	0
GO:0004774	0.3961	2	2	0	0	0	succinate-CoA ligase activity	0
GO:0004775	0.3961	2	2	0	0	0	succinate-CoA ligase (ADP-forming) activity	0
GO:0004803	0.0536	10	3	3	2	2	transposase activity	0
GO:0004812	0.1929	20	14	6	1	1	aminoacyl-tRNA ligase activity	0
GO:0004820	0.2793	2	2	2	1	1	glycine-tRNA ligase activity	0
GO:0004857	0.0139	2	0	0	0	0	enzyme inhibitor activity	0
GO:0004871	0.0223	4	0	0	0	0	signal transducer activity	0
GO:0004872	0.0647	20	4	0	0	0	receptor activity	0
GO:0005198	0.278	96	64	57	42	32	structural molecule activity	0
GO:0005215	0.1414	415	90	27	2	1	transporter activity	0
GO:0005315	0.3122	3	3	2	0	0	inorganic phosphate transmembrane transporter activity	0
GO:0005351	0.0999	4	2	1	0	0	sugar:hydrogen symporter activity	0
GO:0005402	0.0999	4	2	1	0	0	cation:sugar symporter activity	0
GO:0005488	0.4619	3545	3545	1340	326	60	binding	0
GO:0005506	0.0317	9	2	0	0	0	iron ion binding	0
GO:0005515	0.0223	2	0	0	0	0	protein binding	0
GO:0005524	0.1957	515	155	78	43	17	ATP binding	0
GO:0005525	0.0663	4	0	0	0	0	GTP binding	0
GO:0005618	0.0532	4	4	2	0	0	cell wall	0
GO:0005622	0.2887	982	421	296	175	31	intracellular	0
GO:0005623	0.3407	1789	1129	598	217	34	cell	0
GO:0005694	0.2191	22	18	11	7	4	chromosome	0
GO:0005737	0.3095	648	332	216	123	29	cytoplasm	0
GO:0005829	0.0293	2	1	1	0	0	cytosol	0
GO:0005840	0.3018	86	64	53	42	32	ribosome	0
GO:0005886	0.1247	353	0	0	0	0	plasma membrane	0
GO:0005975	0.1054	204	15	3	0	0	carbohydrate metabolic process	0
GO:0005976	0.0331	2	1	0	0	0	polysaccharide metabolic process	0
GO:0005996	0.0444	5	1	1	0	0	monosaccharide metabolic process	0
GO:0006006	0.0672	3	0	0	0	0	glucose metabolic process	0
GO:0006007	0.069	3	0	0	0	0	glucose catabolic process	0
GO:0006022	0.0607	9	0	0	0	0	aminoglycan metabolic process	0
GO:0006023	0.2322	8	0	0	0	0	aminoglycan biosynthetic process	0
GO:0006024	0.2322	8	0	0	0	0	glycosaminoglycan biosynthetic process	0
GO:0006066	0.0806	2	0	0	0	0	alcohol metabolic process	0
GO:0006081	0.1466	3	3	2	0	0	cellular aldehyde metabolic process	0
GO:0006082	0.2007	215	102	56	21	14	organic acid metabolic process	0
GO:0006084	0.0485	1	0	0	0	0	acetyl-CoA metabolic process	0
GO:0006090	0.2445	3	3	2	0	0	pyruvate metabolic process	0
GO:0006091	0.0964	31	21	12	0	0	generation of precursor metabolites and energy	0
GO:0006098	0.0722	3	1	0	0	0	pentose-phosphate shunt	0
GO:0006105	0.1177	1	0	0	0	0	succinate metabolic process	0
GO:0006119	0.0981	3	0	0	0	0	oxidative phosphorylation	0
GO:0006139	0.2684	1731	592	188	70	3	nucleobase-containing compound metabolic process	0
GO:0006152	0.0613	14	0	0	0	0	purine nucleoside catabolic process	0
GO:0006163	0.0829	68	5	3	3	3	purine nucleotide metabolic process	0
GO:0006164	0.1147	19	13	8	5	2	purine nucleotide biosynthetic process	0
GO:0006184	0.0498	3	0	0	0	0	GTP catabolic process	0
GO:0006188	0.0992	3	1	1	0	0	IMP biosynthetic process	0
GO:0006189	0.0992	3	1	1	0	0	'de novo' IMP biosynthetic process	0
GO:0006195	0.0595	13	0	0	0	0	purine nucleotide catabolic process	0
GO:0006200	0.064	16	0	0	0	0	ATP catabolic process	0
GO:0006213	0.0964	5	0	0	0	0	pyrimidine nucleoside metabolic process	0
GO:0006220	0.1096	6	0	0	0	0	pyrimidine nucleotide metabolic process	0
GO:0006221	0.0763	5	0	0	0	0	pyrimidine nucleotide biosynthetic process	0
GO:0006222	0.0816	1	0	0	0	0	UMP biosynthetic process	0
GO:0006259	0.1164	244	23	0	0	0	DNA metabolic process	0
GO:0006260	0.0483	14	2	2	0	0	DNA replication	0
GO:0006261	0.0693	7	3	1	1	1	DNA-dependent DNA replication	0
GO:0006265	0.0286	2	1	1	1	1	DNA topological change	0
GO:0006269	0.0393	1	0	0	0	0	DNA replication, synthesis of RNA primer	0
GO:0006276	0.1118	2	0	0	0	0	plasmid maintenance	0
GO:0006281	0.0496	17	0	0	0	0	DNA repair	0
GO:0006304	0.0387	2	0	0	0	0	DNA modification	0
GO:0006310	0.0627	30	3	0	0	0	DNA recombination	0
GO:0006313	0.0647	12	5	4	2	2	transposition, DNA-mediated	0
GO:0006323	0.0447	1	0	0	0	0	DNA packaging	0
GO:0006351	0.0839	185	0	0	0	0	transcription, DNA-templated	0
GO:0006355	0.0828	189	0	0	0	0	regulation of transcription, DNA-templated	0
GO:0006364	0.0581	1	0	0	0	0	rRNA processing	0
GO:0006396	0.0844	39	0	0	0	0	RNA processing	0
GO:0006399	0.1652	46	20	12	1	1	tRNA metabolic process	0
GO:0006412	0.3169	138	96	85	57	33	translation	0
GO:0006414	0.0825	3	2	1	0	0	translational elongation	0
GO:0006417	0.0624	3	2	2	0	0	regulation of translation	0
GO:0006418	0.305	19	14	6	1	1	tRNA aminoacylation for protein translation	0
GO:0006426	0.3351	2	2	2	1	1	glycyl-tRNA aminoacylation	0
GO:0006448	0.149	2	2	1	0	0	regulation of translational elongation	0
GO:0006450	0.1632	2	2	1	0	0	regulation of translational fidelity	0
GO:0006451	0.5235	2	1	1	1	1	translational readthrough	0
GO:0006457	0.0327	2	1	1	0	0	protein folding	0
GO:0006461	0.0206	2	0	0	0	0	protein complex assembly	0
GO:0006520	0.2271	146	81	49	21	14	cellular amino acid metabolic process	0
GO:0006525	0.1412	4	4	1	1	1	arginine metabolic process	0
GO:0006526	0.2324	4	4	1	1	1	arginine biosynthetic process	0
GO:0006527	0.0489	1	0	0	0	0	arginine catabolic process	0
GO:0006536	0.0247	1	0	0	0	0	glutamate metabolic process	0
GO:0006541	0.0355	3	0	0	0	0	glutamine metabolic process	0
GO:0006544	0.0772	2	0	0	0	0	glycine metabolic process	0
GO:0006546	0.1785	2	0	0	0	0	glycine catabolic process	0
GO:0006547	0.3543	7	7	7	7	2	histidine metabolic process	0
GO:0006551	0.3247	3	3	1	0	0	leucine metabolic process	0
GO:0006560	0.3545	2	1	0	0	0	proline metabolic process	0
GO:0006561	0.3545	2	1	0	0	0	proline biosynthetic process	0
GO:0006568	0.1527	3	2	2	0	0	tryptophan metabolic process	0
GO:0006575	0.0468	2	2	2	1	1	cellular modified amino acid metabolic process	0
GO:0006576	0.1481	8	4	3	1	0	cellular biogenic amine metabolic process	0
GO:0006580	0.2275	3	0	0	0	0	ethanolamine metabolic process	0
GO:0006586	0.1527	3	2	2	0	0	indolalkylamine metabolic process	0
GO:0006629	0.0539	20	7	1	0	0	lipid metabolic process	0
GO:0006631	0.0225	4	2	2	2	2	fatty acid metabolic process	0
GO:0006633	0.026	3	2	2	2	2	fatty acid biosynthetic process	0
GO:0006637	0.0412	1	0	0	0	0	acyl-CoA metabolic process	0
GO:0006643	0.0699	4	3	2	0	0	membrane lipid metabolic process	0
GO:0006644	0.068	8	4	0	0	0	phospholipid metabolic process	0
GO:0006664	0.078	4	3	2	0	0	glycolipid metabolic process	0
GO:0006720	0.0892	3	3	2	0	0	isoprenoid metabolic process	0
GO:0006721	0.1099	3	3	2	0	0	terpenoid metabolic process	0
GO:0006725	0.2943	1923	806	282	94	4	cellular aromatic compound metabolic process	0
GO:0006730	0.2207	9	4	0	0	0	one-carbon metabolic process	0
GO:0006732	0.088	46	5	2	0	0	coenzyme metabolic process	0
GO:0006733	0.095	7	5	0	0	0	oxidoreduction coenzyme metabolic process	0
GO:0006739	0.0811	3	2	0	0	0	NADP metabolic process	0
GO:0006740	0.0687	3	1	0	0	0	NADPH regeneration	0
GO:0006753	0.1283	132	25	22	10	6	nucleoside phosphate metabolic process	0
GO:0006754	0.1362	8	7	7	5	0	ATP biosynthetic process	0
GO:0006766	0.2358	31	28	24	18	14	vitamin metabolic process	0
GO:0006767	0.2358	31	28	24	18	14	water-soluble vitamin metabolic process	0
GO:0006771	0.2863	4	4	4	4	2	riboflavin metabolic process	0
GO:0006772	0.0272	1	1	1	1	1	thiamine metabolic process	0
GO:0006777	0.1798	5	1	0	0	0	Mo-molybdopterin cofactor biosynthetic process	0
GO:0006778	0.0548	5	4	4	4	4	porphyrin-containing compound metabolic process	0
GO:0006779	0.0649	5	4	4	4	4	porphyrin-containing compound biosynthetic process	0
GO:0006782	0.2391	3	1	0	0	0	protoporphyrinogen IX biosynthetic process	0
GO:0006783	0.1593	3	2	1	0	0	heme biosynthetic process	0
GO:0006790	0.0439	6	0	0	0	0	sulfur compound metabolic process	0
GO:0006793	0.1567	547	78	33	14	9	phosphorus metabolic process	0
GO:0006796	0.1488	518	58	27	14	10	phosphate-containing compound metabolic process	0
GO:0006807	0.3382	2197	1284	405	173	7	nitrogen compound metabolic process	0
GO:0006810	0.1806	1016	185	63	20	10	transport	0
GO:0006811	0.1005	70	30	28	14	7	ion transport	0
GO:0006812	0.0924	18	17	17	17	17	cation transport	0
GO:0006813	0.0394	3	3	3	3	3	potassium ion transport	0
GO:0006814	0.0819	7	6	6	6	6	sodium ion transport	0
GO:0006817	0.326	4	3	3	3	2	phosphate ion transport	0
GO:0006818	0.0463	8	8	8	8	8	hydrogen transport	0
GO:0006820	0.0639	22	5	0	0	0	anion transport	0
GO:0006865	0.02	3	1	1	0	0	amino acid transport	0
GO:0006869	0.1171	3	0	0	0	0	lipid transport	0
GO:0006928	0.1639	20	16	7	0	0	cellular component movement	0
GO:0006935	0.07	12	3	1	0	0	chemotaxis	0
GO:0006950	0.0609	47	0	0	0	0	response to stress	0
GO:0006952	0.0464	4	3	3	3	2	defense response	0
GO:0006974	0.0496	16	0	0	0	0	cellular response to DNA damage stimulus	0
GO:0006996	0.0425	4	0	0	0	0	organelle organization	0
GO:0007049	0.0471	10	2	1	0	0	cell cycle	0
GO:0007059	0.1382	2	2	2	1	1	chromosome segregation	0
GO:0007154	0.033	2	0	0	0	0	cell communication	0
GO:0007155	0.0821	16	0	0	0	0	cell adhesion	0
GO:0007165	0.0298	4	0	0	0	0	signal transduction	0
GO:0008026	0.0123	1	1	1	0	0	ATP-dependent helicase activity	0
GO:0008094	0.0901	3	2	1	1	1	DNA-dependent ATPase activity	0
GO:0008104	0.0698	40	11	1	0	0	protein localization	0
GO:0008137	0.1384	5	5	5	0	0	NADH dehydrogenase (ubiquinone) activity	0
GO:0008152	0.6074	4826	4826	4826	1482	313	metabolic process	0
GO:0008168	0.0531	10	0	0	0	0	methyltransferase activity	0
GO:0008172	0.1688	5	1	0	0	0	S-methyltransferase activity	0
GO:0008233	0.0394	1	0	0	0	0	peptidase activity	0
GO:0008272	0.0635	3	3	3	3	3	sulfate transport	0
GO:0008299	0.0958	3	3	2	0	0	isoprenoid biosynthetic process	0
GO:0008324	0.0706	19	15	13	9	1	cation transmembrane transporter activity	0
GO:0008360	0.0952	7	3	0	0	0	regulation of cell shape	0
GO:0008410	0.1257	2	2	2	2	2	CoA-transferase activity	0
GO:0008509	0.0724	14	4	4	0	0	anion transmembrane transporter activity	0
GO:0008556	0.1632	3	3	3	3	3	potassium-transporting ATPase activity	0
GO:0008610	0.061	23	7	2	0	0	lipid biosynthetic process	0
GO:0008616	0.1112	2	0	0	0	0	queuosine biosynthetic process	0
GO:0008643	0.2164	25	20	17	13	7	carbohydrate transport	0
GO:0008652	0.2487	79	53	35	20	16	cellular amino acid biosynthetic process	0
GO:0008654	0.0719	8	3	0	0	0	phospholipid biosynthetic process	0
GO:0008746	0.1016	2	2	2	0	0	NAD(P)+ transhydrogenase activity	0
GO:0008750	0.1532	2	2	2	0	0	NAD(P)+ transhydrogenase (AB-specific) activity	0
GO:0008851	0.1621	2	2	2	2	2	ethanolamine ammonia-lyase activity	0
GO:0008901	0.0608	2	2	2	2	2	ferredoxin hydrogenase activity	0
GO:0008915	0.0642	1	0	0	0	0	lipid-A-disaccharide synthase activity	0
GO:0008940	0.3512	3	2	1	0	0	nitrate reductase activity	0
GO:0008982	0.2247	10	6	0	0	0	protein-N(PI)-phosphohistidine-sugar phosphotransferase activity	0
GO:0008988	0.1801	1	0	0	0	0	rRNA (adenine-N6-)-methyltransferase activity	0
GO:0009039	0.7255	3	3	3	1	1	urease activity	0
GO:0009055	0.0586	26	12	12	3	0	electron carrier activity	0
GO:0009056	0.0949	122	9	1	0	0	catabolic process	0
GO:0009058	0.3064	1799	756	382	204	61	biosynthetic process	0
GO:0009059	0.2017	1116	245	109	77	41	macromolecule biosynthetic process	0
GO:0009061	0.4272	15	13	11	2	0	anaerobic respiration	0
GO:0009063	0.0532	5	0	0	0	0	cellular amino acid catabolic process	0
GO:0009064	0.0924	13	4	0	0	0	glutamine family amino acid metabolic process	0
GO:0009065	0.0652	3	0	0	0	0	glutamine family amino acid catabolic process	0
GO:0009066	0.0374	1	0	0	0	0	aspartate family amino acid metabolic process	0
GO:0009067	0.0415	1	0	0	0	0	aspartate family amino acid biosynthetic process	0
GO:0009069	0.0319	1	0	0	0	0	serine family amino acid metabolic process	0
GO:0009071	0.1785	2	0	0	0	0	serine family amino acid catabolic process	0
GO:0009072	0.0847	8	2	2	0	0	aromatic amino acid family metabolic process	0
GO:0009073	0.1143	8	2	2	0	0	aromatic amino acid family biosynthetic process	0
GO:0009081	0.2051	6	2	0	0	0	branched-chain amino acid metabolic process	0
GO:0009082	0.2201	6	2	0	0	0	branched-chain amino acid biosynthetic process	0
GO:0009084	0.1876	7	6	2	0	0	glutamine family amino acid biosynthetic process	0
GO:0009098	0.3247	3	3	1	0	0	leucine biosynthetic process	0
GO:0009106	0.7779	2	0	0	0	0	lipoate metabolic process	0
GO:0009107	0.7779	2	0	0	0	0	lipoate biosynthetic process	0
GO:0009108	0.0893	31	6	6	2	1	coenzyme biosynthetic process	0
GO:0009110	0.2479	31	28	24	18	14	vitamin biosynthetic process	0
GO:0009116	0.0937	80	12	5	4	4	nucleoside metabolic process	0
GO:0009117	0.1297	134	25	22	10	6	nucleotide metabolic process	0
GO:0009119	0.0982	78	13	5	4	4	ribonucleoside metabolic process	0
GO:0009123	0.1001	57	15	3	3	2	nucleoside monophosphate metabolic process	0
GO:0009124	0.1498	28	16	12	4	2	nucleoside monophosphate biosynthetic process	0
GO:0009125	0.0585	16	0	0	0	0	nucleoside monophosphate catabolic process	0
GO:0009126	0.0808	40	11	2	2	2	purine nucleoside monophosphate metabolic process	0
GO:0009127	0.1236	12	8	7	7	2	purine nucleoside monophosphate biosynthetic process	0
GO:0009128	0.064	16	0	0	0	0	purine nucleoside monophosphate catabolic process	0
GO:0009129	0.0463	1	0	0	0	0	pyrimidine nucleoside monophosphate metabolic process	0
GO:0009130	0.0463	1	0	0	0	0	pyrimidine nucleoside monophosphate biosynthetic process	0
GO:0009141	0.0762	41	5	3	1	1	nucleoside triphosphate metabolic process	0
GO:0009142	0.12	7	7	7	5	0	nucleoside triphosphate biosynthetic process	0
GO:0009143	0.0615	15	0	0	0	0	nucleoside triphosphate catabolic process	0
GO:0009144	0.0683	31	4	2	1	1	purine nucleoside triphosphate metabolic process	0
GO:0009145	0.1336	8	7	7	5	0	purine nucleoside triphosphate biosynthetic process	0
GO:0009146	0.0613	14	0	0	0	0	purine nucleoside triphosphate catabolic process	0
GO:0009150	0.0853	67	7	3	3	3	purine ribonucleotide metabolic process	0
GO:0009152	0.1241	18	13	8	7	2	purine ribonucleotide biosynthetic process	0
GO:0009154	0.0607	14	0	0	0	0	purine ribonucleotide catabolic process	0
GO:0009156	0.1577	27	17	11	4	2	ribonucleoside monophosphate biosynthetic process	0
GO:0009158	0.064	16	0	0	0	0	ribonucleoside monophosphate catabolic process	0
GO:0009161	0.1031	56	15	3	3	2	ribonucleoside monophosphate metabolic process	0
GO:0009163	0.1425	27	18	11	5	3	nucleoside biosynthetic process	0
GO:0009164	0.06	16	0	0	0	0	nucleoside catabolic process	0
GO:0009165	0.1358	46	28	15	13	6	nucleotide biosynthetic process	0
GO:0009166	0.0542	13	0	0	0	0	nucleotide catabolic process	0
GO:0009167	0.0808	40	11	2	2	2	purine ribonucleoside monophosphate metabolic process	0
GO:0009168	0.1236	12	8	7	7	2	purine ribonucleoside monophosphate biosynthetic process	0
GO:0009169	0.064	16	0	0	0	0	purine ribonucleoside monophosphate catabolic process	0
GO:0009173	0.0816	1	0	0	0	0	pyrimidine ribonucleoside monophosphate metabolic process	0
GO:0009174	0.0816	1	0	0	0	0	pyrimidine ribonucleoside monophosphate biosynthetic process	0
GO:0009199	0.0772	34	5	2	1	1	ribonucleoside triphosphate metabolic process	0
GO:0009201	0.1275	9	7	7	5	0	ribonucleoside triphosphate biosynthetic process	0
GO:0009203	0.0613	14	0	0	0	0	ribonucleoside triphosphate catabolic process	0
GO:0009205	0.0683	31	4	2	1	1	purine ribonucleoside triphosphate metabolic process	0
GO:0009206	0.1336	8	7	7	5	0	purine ribonucleoside triphosphate biosynthetic process	0
GO:0009207	0.0613	14	0	0	0	0	purine ribonucleoside triphosphate catabolic process	0
GO:0009218	0.1648	5	2	0	0	0	pyrimidine ribonucleotide metabolic process	0
GO:0009220	0.1648	5	2	0	0	0	pyrimidine ribonucleotide biosynthetic process	0
GO:0009225	0.0143	1	1	0	0	0	nucleotide-sugar metabolic process	0
GO:0009228	0.0228	1	1	1	0	0	thiamine biosynthetic process	0
GO:0009231	0.2863	4	4	4	4	2	riboflavin biosynthetic process	0
GO:0009235	0.3289	18	15	15	14	13	cobalamin metabolic process	0
GO:0009236	0.3359	18	15	15	14	13	cobalamin biosynthetic process	0
GO:0009240	0.3496	3	3	2	0	0	isopentenyl diphosphate biosynthetic process	0
GO:0009245	0.1658	5	3	2	0	0	lipid A biosynthetic process	0
GO:0009247	0.1255	4	3	2	0	0	glycolipid biosynthetic process	0
GO:0009252	0.2468	8	0	0	0	0	peptidoglycan biosynthetic process	0
GO:0009259	0.1189	82	20	12	4	3	ribonucleotide metabolic process	0
GO:0009260	0.1748	33	21	17	4	3	ribonucleotide biosynthetic process	0
GO:0009261	0.0607	14	0	0	0	0	ribonucleotide catabolic process	0
GO:0009268	0.0473	1	0	0	0	0	response to pH	0
GO:0009273	0.2047	8	0	0	0	0	peptidoglycan-based cell wall biogenesis	0
GO:0009274	0.1829	4	4	4	0	0	peptidoglycan-based cell wall	0
GO:0009276	0.1946	4	4	4	0	0	Gram-negative-bacterium-type cell wall	0
GO:0009279	0.0425	15	0	0	0	0	cell outer membrane	0
GO:0009288	0.1748	24	17	12	1	0	bacterial-type flagellum	0
GO:0009289	0.1836	19	0	0	0	0	pilus	0
GO:0009292	0.0523	1	0	0	0	0	genetic transfer	0
GO:0009294	0.053	1	0	0	0	0	DNA mediated transformation	0
GO:0009306	0.0398	15	0	0	0	0	protein secretion	0
GO:0009308	0.0774	8	5	3	1	0	amine metabolic process	0
GO:0009309	0.1655	3	2	2	0	0	amine biosynthetic process	0
GO:0009311	0.1161	5	5	4	0	0	oligosaccharide metabolic process	0
GO:0009312	0.1351	5	4	4	0	0	oligosaccharide biosynthetic process	0
GO:0009325	0.5188	3	2	1	0	0	nitrate reductase complex	0
GO:0009376	0.7873	2	2	2	1	1	HslUV protease complex	0
GO:0009399	0.2025	5	4	4	0	0	nitrogen fixation	0
GO:0009401	0.3317	21	18	18	13	7	phosphoenolpyruvate-dependent sugar phosphotransferase system	0
GO:0009404	0.0395	2	1	1	1	1	toxin metabolic process	0
GO:0009425	0.1627	9	6	0	0	0	bacterial-type flagellum basal body	0
GO:0009426	0.227	2	1	1	0	0	bacterial-type flagellum basal body, distal rod	0
GO:0009435	0.0863	3	3	3	3	3	NAD biosynthetic process	0
GO:0009451	0.0727	19	0	0	0	0	RNA modification	0
GO:0009521	0.3825	10	10	10	10	6	photosystem	0
GO:0009522	0.1101	3	1	0	0	0	photosystem I	0
GO:0009523	0.2281	7	6	5	0	0	photosystem II	0
GO:0009579	0.1416	13	13	13	13	12	thylakoid	0
GO:0009605	0.0478	11	3	1	0	0	response to external stimulus	0
GO:0009607	0.0628	4	4	3	3	2	response to biotic stimulus	0
GO:0009615	0.1045	4	4	4	3	2	response to virus	0
GO:0009628	0.0157	1	1	1	1	1	response to abiotic stimulus	0
GO:0009653	0.0398	9	3	0	0	0	anatomical structure morphogenesis	0
GO:0009767	0.4908	5	5	2	0	0	photosynthetic electron transport chain	0
GO:0009772	0.2436	3	1	0	0	0	photosynthetic electron transport in photosystem II	0
GO:0009847	0.0815	7	0	0	0	0	spore germination	0
GO:0009889	0.0854	198	0	0	0	0	regulation of biosynthetic process	0
GO:0009891	0.0273	1	1	1	0	0	positive regulation of biosynthetic process	0
GO:0009893	0.0246	1	1	1	0	0	positive regulation of metabolic process	0
GO:0009987	0.5119	3885	3885	1954	702	242	cellular process	0
GO:0010035	0.0607	5	4	4	4	4	response to inorganic substance	0
GO:0010038	0.0654	4	4	4	4	4	response to metal ion	0
GO:0010467	0.2014	993	221	130	71	41	gene expression	0
GO:0010468	0.0873	223	0	0	0	0	regulation of gene expression	0
GO:0010556	0.0854	198	0	0	0	0	regulation of macromolecule biosynthetic process	0
GO:0010557	0.0273	1	1	1	0	0	positive regulation of macromolecule biosynthetic process	0
GO:0010604	0.0273	1	1	1	0	0	positive regulation of macromolecule metabolic process	0
GO:0010608	0.0588	3	2	2	0	0	posttranscriptional regulation of gene expression	0
GO:0010628	0.0369	1	1	1	1	1	positive regulation of gene expression	0
GO:0010876	0.1171	3	0	0	0	0	lipid localization	0
GO:0015031	0.0691	38	11	1	0	0	protein transport	0
GO:0015074	0.0432	5	3	0	0	0	DNA integration	0
GO:0015075	0.0829	49	22	12	0	0	ion transmembrane transporter activity	0
GO:0015077	0.0442	12	11	11	11	11	monovalent inorganic cation transmembrane transporter activity	0
GO:0015078	0.0316	8	8	8	8	8	hydrogen ion transmembrane transporter activity	0
GO:0015079	0.0478	3	3	3	3	3	potassium ion transmembrane transporter activity	0
GO:0015081	0.0129	1	0	0	0	0	sodium ion transmembrane transporter activity	0
GO:0015097	0.1259	2	0	0	0	0	mercury ion transmembrane transporter activity	0
GO:0015098	0.1115	2	2	2	0	0	molybdate ion transmembrane transporter activity	0
GO:0015103	0.1003	5	5	5	1	1	inorganic anion transmembrane transporter activity	0
GO:0015116	0.091	3	3	3	3	3	sulfate transmembrane transporter activity	0
GO:0015144	0.1825	13	12	5	0	0	carbohydrate transmembrane transporter activity	0
GO:0015197	0.0598	1	1	1	1	1	peptide transporter activity	0
GO:0015235	0.3234	5	4	4	1	1	cobalamin transporter activity	0
GO:0015267	0.0103	1	0	0	0	0	channel activity	0
GO:0015291	0.0481	7	2	1	0	0	secondary active transmembrane transporter activity	0
GO:0015293	0.0634	6	2	1	0	0	symporter activity	0
GO:0015294	0.0637	5	2	1	0	0	solute:cation symporter activity	0
GO:0015295	0.0999	4	2	1	0	0	solute:hydrogen symporter activity	0
GO:0015370	0.0179	1	0	0	0	0	solute:sodium symporter activity	0
GO:0015399	0.1159	18	17	17	13	0	primary active transmembrane transporter activity	0
GO:0015405	0.1159	18	17	17	13	0	P-P-bond-hydrolysis-driven transmembrane transporter activity	0
GO:0015419	0.1047	3	3	3	3	3	sulfate transmembrane-transporting ATPase activity	0
GO:0015420	0.3496	5	4	4	1	1	cobalamin-transporting ATPase activity	0
GO:0015604	0.1922	3	3	3	3	3	organic phosphonate transmembrane transporter activity	0
GO:0015662	0.0806	3	3	3	3	3	ATPase activity, coupled to transmembrane movement of ions, phosphorylative mechanism	0
GO:0015672	0.0745	18	17	17	17	17	monovalent inorganic cation transport	0
GO:0015689	0.1115	2	2	2	0	0	molybdate ion transport	0
GO:0015694	0.1259	2	0	0	0	0	mercury ion transport	0
GO:0015698	0.1504	9	9	8	2	1	inorganic anion transport	0
GO:0015711	0.0297	1	1	1	0	0	organic anion transport	0
GO:0015716	0.2537	3	3	2	2	2	organic phosphonate transport	0
GO:0015774	0.1046	2	1	1	0	0	polysaccharide transport	0
GO:0015833	0.0339	1	1	1	1	1	peptide transport	0
GO:0015849	0.0302	1	1	1	0	0	organic acid transport	0
GO:0015920	0.2459	3	0	0	0	0	lipopolysaccharide transport	0
GO:0015935	0.1866	5	0	0	0	0	small ribosomal subunit	0
GO:0015939	0.4036	3	2	2	1	1	pantothenate metabolic process	0
GO:0015940	0.4951	3	2	2	1	1	pantothenate biosynthetic process	0
GO:0015947	0.4856	15	13	11	2	0	methane metabolic process	0
GO:0015975	0.4856	15	13	11	2	0	energy derivation by oxidation of reduced inorganic compounds	0
GO:0015979	0.1167	13	13	13	13	12	photosynthesis	0
GO:0015980	0.1019	17	13	11	2	0	energy derivation by oxidation of organic compounds	0
GO:0015985	0.1362	8	7	7	5	0	energy coupled proton transport, down electrochemical gradient	0
GO:0015986	0.1362	8	7	7	5	0	ATP synthesis coupled proton transport	0
GO:0015988	0.1464	5	5	4	0	0	energy coupled proton transmembrane transport, against electrochemical gradient	0
GO:0015991	0.1605	5	5	4	0	0	ATP hydrolysis coupled proton transport	0
GO:0015992	0.0463	8	8	8	8	8	proton transport	0
GO:0015994	0.0316	1	0	0	0	0	chlorophyll metabolic process	0
GO:0015995	0.0334	1	0	0	0	0	chlorophyll biosynthetic process	0
GO:0016020	0.2739	2025	1008	30	10	8	membrane	0
GO:0016021	0.1771	1268	143	9	0	0	integral component of membrane	0
GO:0016032	0.1912	8	7	5	0	0	viral process	0
GO:0016043	0.0826	64	0	0	0	0	cellular component organization	0
GO:0016052	0.0429	5	2	1	1	1	carbohydrate catabolic process	0
GO:0016053	0.1869	95	51	36	20	14	organic acid biosynthetic process	0
GO:0016054	0.0871	6	0	0	0	0	organic acid catabolic process	0
GO:0016070	0.1278	660	47	4	2	1	RNA metabolic process	0
GO:0016072	0.0581	1	0	0	0	0	rRNA metabolic process	0
GO:0016114	0.1099	3	3	2	0	0	terpenoid biosynthetic process	0
GO:0016151	0.2082	6	5	5	5	2	nickel cation binding	0
GO:0016163	0.1614	2	1	0	0	0	nitrogenase activity	0
GO:0016168	0.4532	4	4	4	1	1	chlorophyll binding	0
GO:0016337	0.1767	2	2	0	0	0	cell-cell adhesion	0
GO:0016405	0.1702	2	0	0	0	0	CoA-ligase activity	0
GO:0016433	0.0663	1	0	0	0	0	rRNA (adenine) methyltransferase activity	0
GO:0016462	0.121	150	53	13	5	0	pyrophosphatase activity	0
GO:0016469	0.1274	7	7	7	7	2	proton-transporting two-sector ATPase complex	0
GO:0016491	0.1118	370	41	18	4	4	oxidoreductase activity	0
GO:0016628	0.0342	1	0	0	0	0	oxidoreductase activity, acting on the CH-CH group of donors, NAD or NADP as acceptor	0
GO:0016651	0.1807	18	16	13	13	7	oxidoreductase activity, acting on NAD(P)H	0
GO:0016652	0.3227	2	2	0	0	0	oxidoreductase activity, acting on NAD(P)H, NAD(P) as acceptor	0
GO:0016655	0.2427	16	15	13	13	7	oxidoreductase activity, acting on NAD(P)H, quinone or similar compound as acceptor	0
GO:0016661	0.087	3	1	1	0	0	oxidoreductase activity, acting on other nitrogenous compounds as donors	0
GO:0016695	0.122	3	2	2	2	2	oxidoreductase activity, acting on hydrogen as donor	0
GO:0016699	0.0608	2	2	2	2	2	oxidoreductase activity, acting on hydrogen as donor, iron-sulfur protein as acceptor	0
GO:0016725	0.0169	1	0	0	0	0	oxidoreductase activity, acting on CH or CH2 groups	0
GO:0016730	0.0773	3	2	2	2	2	oxidoreductase activity, acting on iron-sulfur proteins as donors	0
GO:0016732	0.1614	2	1	0	0	0	oxidoreductase activity, acting on iron-sulfur proteins as donors, dinitrogen as acceptor	0
GO:0016740	0.2248	1728	221	0	0	0	transferase activity	0
GO:0016741	0.053	11	0	0	0	0	transferase activity, transferring one-carbon groups	0
GO:0016746	0.0465	1	0	0	0	0	transferase activity, transferring acyl groups	0
GO:0016747	0.0382	3	0	0	0	0	transferase activity, transferring acyl groups other than amino-acyl groups	0
GO:0016757	0.026	4	1	1	0	0	transferase activity, transferring glycosyl groups	0
GO:0016763	0.047	5	1	1	0	0	transferase activity, transferring pentosyl groups	0
GO:0016772	0.0815	72	8	0	0	0	transferase activity, transferring phosphorus-containing groups	0
GO:0016773	0.0375	12	3	0	0	0	phosphotransferase activity, alcohol group as acceptor	0
GO:0016779	0.0378	5	1	1	1	1	nucleotidyltransferase activity	0
GO:0016782	0.0661	5	3	1	0	0	transferase activity, transferring sulfur-containing groups	0
GO:0016787	0.2817	2013	717	84	49	24	hydrolase activity	0
GO:0016788	0.1278	213	36	34	25	21	hydrolase activity, acting on ester bonds	0
GO:0016798	0.0837	56	10	1	0	0	hydrolase activity, acting on glycosyl bonds	0
GO:0016810	0.0302	4	3	3	0	0	hydrolase activity, acting on carbon-nitrogen (but not peptide) bonds	0
GO:0016811	0.0156	3	3	3	0	0	hydrolase activity, acting on carbon-nitrogen (but not peptide) bonds, in linear amides	0
GO:0016817	0.1197	151	53	13	5	0	hydrolase activity, acting on acid anhydrides	0
GO:0016818	0.1207	152	53	13	5	0	hydrolase activity, acting on acid anhydrides, in phosphorus-containing anhydrides	0
GO:0016820	0.1395	19	17	17	13	0	hydrolase activity, acting on acid anhydrides, catalyzing transmembrane movement of substances	0
GO:0016829	0.0725	87	0	0	0	0	lyase activity	0
GO:0016835	0.0474	18	0	0	0	0	carbon-oxygen lyase activity	0
GO:0016836	0.0884	16	1	0	0	0	hydro-lyase activity	0
GO:0016837	0.0854	1	0	0	0	0	carbon-oxygen lyase activity, acting on polysaccharides	0
GO:0016840	0.0328	2	2	2	2	2	carbon-nitrogen lyase activity	0
GO:0016841	0.0445	2	2	2	2	2	ammonia-lyase activity	0
GO:0016851	0.3086	2	1	0	0	0	magnesium chelatase activity	0
GO:0016853	0.0361	4	1	1	0	0	isomerase activity	0
GO:0016859	0.017	2	2	0	0	0	cis-trans isomerase activity	0
GO:0016874	0.1113	50	26	5	1	1	ligase activity	0
GO:0016875	0.19	20	14	6	1	1	ligase activity, forming carbon-oxygen bonds	0
GO:0016876	0.19	20	14	6	1	1	ligase activity, forming aminoacyl-tRNA and related compounds	0
GO:0016877	0.086	1	0	0	0	0	ligase activity, forming carbon-sulfur bonds	0
GO:0016878	0.086	1	0	0	0	0	acid-thiol ligase activity	0
GO:0016879	0.1103	22	5	2	1	1	ligase activity, forming carbon-nitrogen bonds	0
GO:0016881	0.114	3	0	0	0	0	acid-amino acid ligase activity	0
GO:0016884	0.1158	4	2	2	1	1	carbon-nitrogen ligase activity, with glutamine as amido-N-donor	0
GO:0016887	0.108	54	27	1	0	0	ATPase activity	0
GO:0017004	0.0265	3	0	0	0	0	cytochrome complex assembly	0
GO:0017076	0.2142	709	200	110	60	9	purine nucleotide binding	0
GO:0017111	0.1201	132	54	13	5	0	nucleoside-triphosphatase activity	0
GO:0018130	0.1556	971	116	52	34	2	heterocycle biosynthetic process	0
GO:0018193	0.036	2	0	0	0	0	peptidyl-amino acid modification	0
GO:0018208	0.017	2	2	0	0	0	peptidyl-proline modification	0
GO:0018298	0.0331	2	0	0	0	0	protein-chromophore linkage	0
GO:0018493	0.1416	1	0	0	0	0	formylmethanofuran dehydrogenase activity	0
GO:0018697	0.1614	2	1	0	0	0	carbonyl sulfide nitrogenase activity	0
GO:0018822	0.4437	3	3	1	0	0	nitrile hydratase activity	0
GO:0019001	0.0446	4	0	0	0	0	guanyl nucleotide binding	0
GO:0019012	0.2322	20	19	17	15	5	virion	0
GO:0019015	0.6144	15	15	15	13	4	viral genome	0
GO:0019028	0.0569	2	2	2	1	1	viral capsid	0
GO:0019038	0.6144	15	15	15	13	4	provirus	0
GO:0019058	0.1139	5	3	2	2	2	viral life cycle	0
GO:0019068	0.1552	5	3	2	2	2	virion assembly	0
GO:0019069	0.2947	5	3	2	1	1	viral capsid assembly	0
GO:0019219	0.0855	214	0	0	0	0	regulation of nucleobase-containing compound metabolic process	0
GO:0019222	0.0933	327	0	0	0	0	regulation of metabolic process	0
GO:0019288	0.3496	3	3	2	0	0	isopentenyl diphosphate biosynthetic process, methylerythritol 4-phosphate pathway	0
GO:0019318	0.0363	3	0	0	0	0	hexose metabolic process	0
GO:0019320	0.0682	3	0	0	0	0	hexose catabolic process	0
GO:0019359	0.1645	4	3	3	3	3	nicotinamide nucleotide biosynthetic process	0
GO:0019362	0.1032	7	5	1	0	0	pyridine nucleotide metabolic process	0
GO:0019363	0.1432	4	3	3	3	3	pyridine nucleotide biosynthetic process	0
GO:0019386	0.4755	7	3	0	0	0	methanogenesis, from carbon dioxide	0
GO:0019438	0.1525	944	104	57	21	1	aromatic compound biosynthetic process	0
GO:0019439	0.054	30	0	0	0	0	aromatic compound catabolic process	0
GO:0019538	0.1906	374	152	100	74	37	protein metabolic process	0
GO:0019545	0.1177	1	0	0	0	0	arginine catabolic process to succinate	0
GO:0019627	0.4242	4	4	4	2	1	urea metabolic process	0
GO:0019634	0.4521	6	6	4	1	0	organic phosphonate metabolic process	0
GO:0019637	0.1537	268	64	30	11	6	organophosphate metabolic process	0
GO:0019674	0.1646	4	3	3	3	3	NAD metabolic process	0
GO:0019682	0.3496	3	3	2	0	0	glyceraldehyde-3-phosphate metabolic process	0
GO:0019684	0.1406	5	5	2	0	0	photosynthesis, light reaction	0
GO:0019693	0.1225	89	20	15	5	3	ribose phosphate metabolic process	0
GO:0019700	0.5865	2	1	0	0	0	organic phosphonate catabolic process	0
GO:0019720	0.1798	5	1	0	0	0	Mo-molybdopterin cofactor metabolic process	0
GO:0019748	0.027	2	1	1	1	1	secondary metabolic process	0
GO:0019752	0.1994	208	99	54	21	13	carboxylic acid metabolic process	0
GO:0019829	0.2023	10	10	10	8	1	cation-transporting ATPase activity	0
GO:0019843	0.4152	42	34	29	25	6	rRNA binding	0
GO:0019867	0.0527	22	0	0	0	0	outer membrane	0
GO:0020037	0.0404	17	6	2	0	0	heme binding	0
GO:0022603	0.0929	7	3	0	0	0	regulation of anatomical structure morphogenesis	0
GO:0022604	0.0952	7	3	0	0	0	regulation of cell morphogenesis	0
GO:0022607	0.0566	21	0	0	0	0	cellular component assembly	0
GO:0022610	0.0551	17	0	0	0	0	biological adhesion	0
GO:0022613	0.065	6	0	0	0	0	ribonucleoprotein complex biogenesis	0
GO:0022803	0.0103	1	0	0	0	0	passive transmembrane transporter activity	0
GO:0022804	0.1112	50	26	20	2	2	active transmembrane transporter activity	0
GO:0022857	0.1042	119	42	29	3	1	transmembrane transporter activity	0
GO:0022890	0.0698	12	11	11	11	10	inorganic cation transmembrane transporter activity	0
GO:0022891	0.0957	79	30	19	0	0	substrate-specific transmembrane transporter activity	0
GO:0022892	0.0913	75	34	19	0	0	substrate-specific transporter activity	0
GO:0022900	0.0707	15	9	2	0	0	electron transport chain	0
GO:0023052	0.0297	4	0	0	0	0	signaling	0
GO:0030001	0.0405	10	9	9	9	9	metal ion transport	0
GO:0030030	0.0516	8	0	0	0	0	cell projection organization	0
GO:0030031	0.0384	1	0	0	0	0	cell projection assembly	0
GO:0030153	0.1695	2	2	1	1	1	bacteriocin immunity	0
GO:0030170	0.045	2	2	1	0	0	pyridoxal phosphate binding	0
GO:0030203	0.0631	9	0	0	0	0	glycosaminoglycan metabolic process	0
GO:0030234	0.0305	2	0	0	0	0	enzyme regulator activity	0
GO:0030260	0.2071	2	1	0	0	0	entry into host cell	0
GO:0030261	0.0925	2	0	0	0	0	chromosome condensation	0
GO:0030269	0.4892	5	1	0	0	0	tetrahydromethanopterin S-methyltransferase activity	0
GO:0030288	0.0615	4	4	4	2	1	outer membrane-bounded periplasmic space	0
GO:0030312	0.0633	45	5	3	2	1	external encapsulating structure	0
GO:0030313	0.0705	45	4	3	2	1	cell envelope	0
GO:0030420	0.071	2	0	0	0	0	establishment of competence for transformation	0
GO:0030529	0.3097	97	71	59	47	31	ribonucleoprotein complex	0
GO:0030554	0.1962	559	161	79	44	17	adenyl nucleotide binding	0
GO:0030599	0.5401	2	2	2	1	1	pectinesterase activity	0
GO:0030694	0.4083	3	0	0	0	0	bacterial-type flagellum basal body, rod	0
GO:0030699	0.2497	3	2	0	0	0	glycine reductase activity	0
GO:0031167	0.0805	1	0	0	0	0	rRNA methylation	0
GO:0031224	0.178	1271	162	9	0	0	intrinsic component of membrane	0
GO:0031323	0.089	236	0	0	0	0	regulation of cellular metabolic process	0
GO:0031325	0.0246	1	1	1	0	0	positive regulation of cellular metabolic process	0
GO:0031326	0.0854	198	0	0	0	0	regulation of cellular biosynthetic process	0
GO:0031328	0.0273	1	1	1	0	0	positive regulation of cellular biosynthetic process	0
GO:0031344	0.038	1	0	0	0	0	regulation of cell projection organization	0
GO:0031597	0.7873	2	2	2	1	1	cytosolic proteasome complex	0
GO:0031975	0.07	45	4	3	2	1	envelope	0
GO:0032259	0.0501	7	1	0	0	0	methylation	0
GO:0032268	0.0524	3	2	2	0	0	regulation of cellular protein metabolic process	0
GO:0032324	0.1798	5	1	0	0	0	molybdopterin cofactor biosynthetic process	0
GO:0032502	0.0726	24	0	0	0	0	developmental process	0
GO:0032506	0.0132	1	1	0	0	0	cytokinetic process	0
GO:0032549	0.2193	671	198	112	58	9	ribonucleoside binding	0
GO:0032550	0.2187	670	195	109	57	9	purine ribonucleoside binding	0
GO:0032553	0.2107	779	190	111	57	10	ribonucleotide binding	0
GO:0032555	0.2129	676	195	109	57	9	purine ribonucleotide binding	0
GO:0032559	0.1952	513	155	78	43	17	adenyl ribonucleotide binding	0
GO:0032561	0.0446	4	0	0	0	0	guanyl ribonucleotide binding	0
GO:0032774	0.0876	211	0	0	0	0	RNA biosynthetic process	0
GO:0032787	0.0522	6	4	0	0	0	monocarboxylic acid metabolic process	0
GO:0032940	0.0398	15	0	0	0	0	secretion by cell	0
GO:0032989	0.0854	10	4	0	0	0	cellular component morphogenesis	0
GO:0032991	0.1914	170	105	89	62	44	macromolecular complex	0
GO:0033013	0.2032	25	21	20	19	16	tetrapyrrole metabolic process	0
GO:0033014	0.2214	25	21	20	19	16	tetrapyrrole biosynthetic process	0
GO:0033036	0.079	47	16	1	0	0	macromolecule localization	0
GO:0033037	0.1046	2	1	1	0	0	polysaccharide localization	0
GO:0033043	0.038	1	0	0	0	0	regulation of organelle organization	0
GO:0033178	0.1739	5	5	1	0	0	proton-transporting two-sector ATPase complex, catalytic domain	0
GO:0033554	0.0605	23	0	0	0	0	cellular response to stress	0
GO:0034062	0.0487	2	0	0	0	0	RNA polymerase activity	0
GO:0034220	0.0817	12	11	10	9	8	ion transmembrane transport	0
GO:0034470	0.0892	37	0	0	0	0	ncRNA processing	0
GO:0034622	0.0226	2	0	0	0	0	cellular macromolecular complex assembly	0
GO:0034637	0.0225	1	0	0	0	0	cellular carbohydrate biosynthetic process	0
GO:0034641	0.2948	1930	804	277	95	4	cellular nitrogen compound metabolic process	0
GO:0034645	0.1989	1054	222	108	77	41	cellular macromolecule biosynthetic process	0
GO:0034654	0.1136	521	36	2	0	0	nucleobase-containing compound biosynthetic process	0
GO:0034655	0.0555	31	0	0	0	0	nucleobase-containing compound catabolic process	0
GO:0034660	0.1564	64	25	6	1	1	ncRNA metabolic process	0
GO:0035383	0.0412	1	0	0	0	0	thioester metabolic process	0
GO:0035435	0.5254	1	0	0	0	0	phosphate ion transmembrane transport	0
GO:0035639	0.2193	672	197	110	57	9	purine ribonucleoside triphosphate binding	0
GO:0036094	0.2339	1166	246	157	70	12	small molecule binding	0
GO:0036442	0.0816	2	1	0	0	0	hydrogen-exporting ATPase activity	0
GO:0040011	0.1632	31	22	16	2	0	locomotion	0
GO:0042086	0.4892	5	1	0	0	0	5-methyl-5,6,7,8-tetrahydromethanopterin-dependent methyltransferase activity	0
GO:0042120	0.0467	3	0	0	0	0	alginic acid metabolic process	0
GO:0042122	0.1197	4	0	0	0	0	alginic acid catabolic process	0
GO:0042126	0.2638	2	1	1	0	0	nitrate metabolic process	0
GO:0042168	0.1023	3	2	1	0	0	heme metabolic process	0
GO:0042221	0.068	23	10	2	0	0	response to chemical	0
GO:0042254	0.065	6	0	0	0	0	ribosome biogenesis	0
GO:0042278	0.0771	62	5	3	3	3	purine nucleoside metabolic process	0
GO:0042330	0.07	12	3	1	0	0	taxis	0
GO:0042364	0.2479	31	28	24	18	14	water-soluble vitamin biosynthetic process	0
GO:0042398	0.0607	3	2	2	1	1	cellular modified amino acid biosynthetic process	0
GO:0042401	0.1655	3	2	2	0	0	cellular biogenic amine biosynthetic process	0
GO:0042430	0.1527	3	2	2	0	0	indole-containing compound metabolic process	0
GO:0042435	0.3052	3	2	2	0	0	indole-containing compound biosynthetic process	0
GO:0042439	0.2028	3	0	0	0	0	ethanolamine-containing compound metabolic process	0
GO:0042440	0.0393	2	1	0	0	0	pigment metabolic process	0
GO:0042451	0.1174	11	8	7	6	2	purine nucleoside biosynthetic process	0
GO:0042454	0.0626	16	0	0	0	0	ribonucleoside catabolic process	0
GO:0042455	0.1439	27	18	11	4	3	ribonucleoside biosynthetic process	0
GO:0042546	0.1886	8	0	0	0	0	cell wall biogenesis	0
GO:0042597	0.0579	14	4	4	2	1	periplasmic space	0
GO:0042623	0.1319	27	22	20	12	0	ATPase activity, coupled	0
GO:0042625	0.2189	13	13	13	12	3	ATPase activity, coupled to transmembrane movement of ions	0
GO:0042626	0.1543	21	17	17	13	0	ATPase activity, coupled to transmembrane movement of substances	0
GO:0042651	0.1135	11	11	10	7	0	thylakoid membrane	0
GO:0042710	0.0508	1	0	0	0	0	biofilm formation	0
GO:0042723	0.0272	1	1	1	1	1	thiamine-containing compound metabolic process	0
GO:0042724	0.0228	1	1	1	0	0	thiamine-containing compound biosynthetic process	0
GO:0042726	0.2863	4	4	4	4	2	flavin-containing compound metabolic process	0
GO:0042727	0.2863	4	4	4	4	2	flavin-containing compound biosynthetic process	0
GO:0042773	0.1028	3	0	0	0	0	ATP synthesis coupled electron transport	0
GO:0042777	0.2655	7	7	7	5	0	plasma membrane ATP synthesis coupled proton transport	0
GO:0042822	0.011	2	2	2	2	2	pyridoxal phosphate metabolic process	0
GO:0042823	0.011	2	2	2	2	2	pyridoxal phosphate biosynthetic process	0
GO:0042886	0.0191	1	1	1	0	0	amide transport	0
GO:0042995	0.1401	36	9	1	0	0	cell projection	0
GO:0043038	0.2969	19	14	6	1	1	amino acid activation	0
GO:0043039	0.2969	19	14	6	1	1	tRNA aminoacylation	0
GO:0043086	0.0537	2	0	0	0	0	negative regulation of catalytic activity	0
GO:0043163	0.1668	5	0	0	0	0	cell envelope organization	0
GO:0043165	0.1668	5	0	0	0	0	Gram-negative-bacterium-type cell outer membrane assembly	0
GO:0043167	0.2877	1698	678	247	111	13	ion binding	0
GO:0043168	0.2342	980	241	149	84	11	anion binding	0
GO:0043169	0.126	675	32	6	1	1	cation binding	0
GO:0043170	0.3285	2199	1285	362	196	37	macromolecule metabolic process	0
GO:0043225	0.0823	3	3	3	3	3	anion transmembrane-transporting ATPase activity	0
GO:0043226	0.2302	149	98	70	53	22	organelle	0
GO:0043228	0.2471	148	97	70	53	22	non-membrane-bounded organelle	0
GO:0043229	0.2312	147	96	70	53	22	intracellular organelle	0
GO:0043232	0.2471	148	97	70	53	22	intracellular non-membrane-bounded organelle	0
GO:0043234	0.0785	32	21	19	17	8	protein complex	0
GO:0043412	0.0573	54	0	0	0	0	macromolecule modification	0
GO:0043414	0.0408	2	1	0	0	0	macromolecule methylation	0
GO:0043419	0.7255	3	3	3	1	1	urea catabolic process	0
GO:0043436	0.1998	213	100	54	20	14	oxoacid metabolic process	0
GO:0043446	0.4856	15	13	11	2	0	cellular alkane metabolic process	0
GO:0043447	0.4856	15	13	11	2	0	alkane biosynthetic process	0
GO:0043492	0.1543	21	17	17	13	0	ATPase activity, coupled to movement of substances	0
GO:0043545	0.1798	5	1	0	0	0	molybdopterin cofactor metabolic process	0
GO:0043565	0.0304	4	0	0	0	0	sequence-specific DNA binding	0
GO:0043570	0.047	2	2	2	2	2	maintenance of DNA repeat elements	0
GO:0043571	0.047	2	2	2	2	2	maintenance of CRISPR repeat elements	0
GO:0043603	0.0994	7	7	6	3	1	cellular amide metabolic process	0
GO:0043604	0.0539	3	2	2	1	1	amide biosynthetic process	0
GO:0043605	0.2775	3	3	3	1	1	cellular amide catabolic process	0
GO:0043623	0.0241	2	0	0	0	0	cellular protein complex assembly	0
GO:0043900	0.0708	1	0	0	0	0	regulation of multi-organism process	0
GO:0043933	0.0195	2	0	0	0	0	macromolecular complex subunit organization	0
GO:0044036	0.0495	9	0	0	0	0	cell wall macromolecule metabolic process	0
GO:0044038	0.214	8	0	0	0	0	cell wall macromolecule biosynthetic process	0
GO:0044085	0.0859	56	2	0	0	0	cellular component biogenesis	0
GO:0044087	0.0206	1	1	1	0	0	regulation of cellular component biogenesis	0
GO:0044091	0.1668	5	0	0	0	0	membrane biogenesis	0
GO:0044092	0.0521	2	0	0	0	0	negative regulation of molecular function	0
GO:0044106	0.1297	9	4	3	1	0	cellular amine metabolic process	0
GO:0044205	0.1796	1	0	0	0	0	'de novo' UMP biosynthetic process	0
GO:0044237	0.4544	3091	3091	1215	545	185	cellular metabolic process	0
GO:0044238	0.4402	3091	3091	1036	420	143	primary metabolic process	0
GO:0044247	0.1213	3	0	0	0	0	cellular polysaccharide catabolic process	0
GO:0044248	0.0654	42	0	0	0	0	cellular catabolic process	0
GO:0044249	0.2956	1644	666	353	196	59	cellular biosynthetic process	0
GO:0044255	0.0584	21	7	3	0	0	cellular lipid metabolic process	0
GO:0044260	0.2987	1795	779	318	180	33	cellular macromolecule metabolic process	0
GO:0044262	0.0265	1	0	0	0	0	cellular carbohydrate metabolic process	0
GO:0044267	0.2235	226	129	98	73	36	cellular protein metabolic process	0
GO:0044270	0.0595	37	0	0	0	0	cellular nitrogen compound catabolic process	0
GO:0044271	0.1503	971	93	54	22	1	cellular nitrogen compound biosynthetic process	0
GO:0044272	0.037	6	0	0	0	0	sulfur compound biosynthetic process	0
GO:0044275	0.0708	1	0	0	0	0	cellular carbohydrate catabolic process	0
GO:0044281	0.2788	809	338	178	81	39	small molecule metabolic process	0
GO:0044282	0.0705	12	2	2	1	1	small molecule catabolic process	0
GO:0044283	0.232	155	90	65	48	25	small molecule biosynthetic process	0
GO:0044391	0.2169	12	0	0	0	0	ribosomal subunit	0
GO:0044403	0.0892	12	7	1	0	0	symbiosis, encompassing mutualism through parasitism	0
GO:0044409	0.2071	2	1	0	0	0	entry into host	0
GO:0044419	0.0892	12	7	1	0	0	interspecies interaction between organisms	0
GO:0044422	0.1456	42	29	0	0	0	organelle part	0
GO:0044423	0.2349	20	19	17	15	5	virion part	0
GO:0044424	0.3026	882	426	282	174	31	intracellular part	0
GO:0044425	0.1848	1307	195	21	14	11	membrane part	0
GO:0044427	0.3404	16	15	13	13	4	chromosomal part	0
GO:0044436	0.1416	13	13	13	13	12	thylakoid part	0
GO:0044444	0.2284	93	69	55	43	31	cytoplasmic part	0
GO:0044445	0.2344	2	2	2	1	1	cytosolic part	0
GO:0044446	0.1398	28	16	0	0	0	intracellular organelle part	0
GO:0044461	0.1747	14	11	1	0	0	bacterial-type flagellum part	0
GO:0044462	0.0644	32	7	3	2	1	external encapsulating structure part	0
GO:0044463	0.1747	14	11	1	0	0	cell projection part	0
GO:0044464	0.3407	1789	1129	598	217	34	cell part	0
GO:0044699	0.4299	2973	2973	1136	381	39	single-organism process	0
GO:0044700	0.0297	4	0	0	0	0	single organism signaling	0
GO:0044710	0.3488	1941	1168	584	222	35	single-organism metabolic process	0
GO:0044711	0.2563	485	255	178	78	37	single-organism biosynthetic process	0
GO:0044712	0.0754	49	0	0	0	0	single-organism catabolic process	0
GO:0044723	0.0674	30	10	4	0	0	single-organism carbohydrate metabolic process	0
GO:0044724	0.0709	3	1	0	0	0	single-organism carbohydrate catabolic process	0
GO:0044763	0.348	2190	1375	483	211	35	single-organism cellular process	0
GO:0044764	0.1015	20	11	0	0	0	multi-organism cellular process	0
GO:0044765	0.1351	364	77	46	18	11	single-organism transport	0
GO:0044767	0.0405	9	0	0	0	0	single-organism developmental process	0
GO:0044769	0.1995	7	7	7	5	0	ATPase activity, coupled to transmembrane movement of ions, rotational mechanism	0
GO:0044780	0.0547	1	0	0	0	0	bacterial-type flagellum assembly	0
GO:0044781	0.0667	9	0	0	0	0	bacterial-type flagellum organization	0
GO:0044802	0.1048	5	0	0	0	0	single-organism membrane organization	0
GO:0045135	0.1197	4	0	0	0	0	poly(beta-D-mannuronate) lyase activity	0
GO:0045156	0.1376	3	0	0	0	0	electron transporter, transferring electrons within the cyclic electron transport pathway of photosynthesis activity	0
GO:0045184	0.0698	40	11	1	0	0	establishment of protein localization	0
GO:0045226	0.0832	2	1	0	0	0	extracellular polysaccharide biosynthetic process	0
GO:0045227	0.4129	2	2	1	0	0	capsule polysaccharide biosynthetic process	0
GO:0045229	0.0534	6	0	0	0	0	external encapsulating structure organization	0
GO:0045230	0.4129	2	2	1	0	0	capsule organization	0
GO:0045259	0.038	4	4	4	4	4	proton-transporting ATP synthase complex	0
GO:0045261	0.2136	3	3	3	1	0	proton-transporting ATP synthase complex, catalytic core F(1)	0
GO:0045333	0.1096	17	13	11	2	0	cellular respiration	0
GO:0045893	0.0369	1	1	1	1	1	positive regulation of transcription, DNA-templated	0
GO:0045935	0.0369	1	1	1	1	1	positive regulation of nucleobase-containing compound metabolic process	0
GO:0046034	0.0794	24	5	1	0	0	ATP metabolic process	0
GO:0046039	0.0558	2	0	0	0	0	GTP metabolic process	0
GO:0046040	0.0992	3	1	1	0	0	IMP metabolic process	0
GO:0046049	0.0816	1	0	0	0	0	UMP metabolic process	0
GO:0046116	0.1112	2	0	0	0	0	queuosine metabolic process	0
GO:0046128	0.0768	61	5	3	3	3	purine ribonucleoside metabolic process	0
GO:0046129	0.1174	11	8	7	6	2	purine ribonucleoside biosynthetic process	0
GO:0046130	0.0613	14	0	0	0	0	purine ribonucleoside catabolic process	0
GO:0046131	0.1064	5	0	0	0	0	pyrimidine ribonucleoside metabolic process	0
GO:0046132	0.1753	5	2	0	0	0	pyrimidine ribonucleoside biosynthetic process	0
GO:0046134	0.1753	5	2	0	0	0	pyrimidine nucleoside biosynthetic process	0
GO:0046148	0.0473	2	1	0	0	0	pigment biosynthetic process	0
GO:0046164	0.0481	1	0	0	0	0	alcohol catabolic process	0
GO:0046219	0.3052	3	2	2	0	0	indolalkylamine biosynthetic process	0
GO:0046336	0.0791	1	0	0	0	0	ethanolamine catabolic process	0
GO:0046365	0.0512	4	2	1	0	0	monosaccharide catabolic process	0
GO:0046379	0.0832	2	1	0	0	0	extracellular polysaccharide metabolic process	0
GO:0046390	0.1741	34	21	17	7	3	ribose phosphate biosynthetic process	0
GO:0046394	0.1878	95	51	36	20	14	carboxylic acid biosynthetic process	0
GO:0046395	0.0871	6	0	0	0	0	carboxylic acid catabolic process	0
GO:0046405	0.5502	3	3	2	2	2	glycerol dehydratase activity	0
GO:0046434	0.0715	26	0	0	0	0	organophosphate catabolic process	0
GO:0046467	0.1255	4	3	2	0	0	membrane lipid biosynthetic process	0
GO:0046483	0.2948	1915	803	277	98	4	heterocycle metabolic process	0
GO:0046490	0.3496	3	3	2	0	0	isopentenyl diphosphate metabolic process	0
GO:0046493	0.1658	5	3	2	0	0	lipid A metabolic process	0
GO:0046496	0.1082	7	5	1	0	0	nicotinamide nucleotide metabolic process	0
GO:0046501	0.2391	3	1	0	0	0	protoporphyrinogen IX metabolic process	0
GO:0046689	0.1157	4	4	4	4	4	response to mercury ion	0
GO:0046700	0.056	30	0	0	0	0	heterocycle catabolic process	0
GO:0046872	0.1251	660	33	9	1	1	metal ion binding	0
GO:0046873	0.0262	4	3	3	3	3	metal ion transmembrane transporter activity	0
GO:0046903	0.0419	20	0	0	0	0	secretion	0
GO:0046906	0.0672	23	13	11	2	1	tetrapyrrole binding	0
GO:0046914	0.0624	23	7	5	1	1	transition metal ion binding	0
GO:0046933	0.2126	7	7	7	5	0	proton-transporting ATP synthase activity, rotational mechanism	0
GO:0046942	0.0302	1	1	1	0	0	carboxylic acid transport	0
GO:0046961	0.0816	2	1	0	0	0	proton-transporting ATPase activity, rotational mechanism	0
GO:0046992	0.5232	5	5	4	1	0	oxidoreductase activity, acting on X-H and Y-H to form an X-Y bond	0
GO:0048037	0.0722	74	1	0	0	0	cofactor binding	0
GO:0048038	0.0723	5	4	0	0	0	quinone binding	0
GO:0048518	0.0178	1	1	1	0	0	positive regulation of biological process	0
GO:0048522	0.0225	1	1	1	0	0	positive regulation of cellular process	0
GO:0048856	0.0391	9	3	0	0	0	anatomical structure development	0
GO:0048869	0.0394	9	3	0	0	0	cellular developmental process	0
GO:0050136	0.1932	10	7	7	7	5	NADH dehydrogenase (quinone) activity	0
GO:0050485	0.5232	5	5	4	1	0	oxidoreductase activity, acting on X-H and Y-H to form an X-Y bond, with a disulfide as acceptor	0
GO:0050497	0.711	3	0	0	0	0	transferase activity, transferring alkylthio groups	0
GO:0050524	0.711	3	0	0	0	0	coenzyme-B sulfoethylthiotransferase activity	0
GO:0050787	0.1259	2	0	0	0	0	detoxification of mercury ion	0
GO:0050789	0.1132	746	5	0	0	0	regulation of biological process	0
GO:0050790	0.0326	2	0	0	0	0	regulation of catalytic activity	0
GO:0050793	0.0886	7	3	0	0	0	regulation of developmental process	0
GO:0050794	0.1095	580	4	0	0	0	regulation of cellular process	0
GO:0050896	0.0839	133	9	0	0	0	response to stimulus	0
GO:0051002	0.1246	1	0	0	0	0	ligase activity, forming nitrogen-metal bonds	0
GO:0051003	0.1246	1	0	0	0	0	ligase activity, forming nitrogen-metal bonds, forming coordination complexes	0
GO:0051119	0.097	4	2	1	0	0	sugar transmembrane transporter activity	0
GO:0051128	0.0537	6	0	0	0	0	regulation of cellular component organization	0
GO:0051171	0.0855	214	0	0	0	0	regulation of nitrogen compound metabolic process	0
GO:0051173	0.0369	1	1	1	1	1	positive regulation of nitrogen compound metabolic process	0
GO:0051179	0.1953	1067	234	92	31	16	localization	0
GO:0051183	0.22	5	4	4	1	1	vitamin transporter activity	0
GO:0051186	0.0955	61	14	7	3	1	cofactor metabolic process	0
GO:0051188	0.0996	42	14	10	7	2	cofactor biosynthetic process	0
GO:0051189	0.1626	4	1	0	0	0	prosthetic group metabolic process	0
GO:0051213	0.0151	1	0	0	0	0	dioxygenase activity	0
GO:0051234	0.1821	1021	190	66	20	9	establishment of localization	0
GO:0051246	0.0524	3	2	2	0	0	regulation of protein metabolic process	0
GO:0051252	0.0839	192	0	0	0	0	regulation of RNA metabolic process	0
GO:0051254	0.0369	1	1	1	1	1	positive regulation of RNA metabolic process	0
GO:0051276	0.0529	4	2	2	2	2	chromosome organization	0
GO:0051301	0.0442	11	1	1	0	0	cell division	0
GO:0051302	0.1481	2	1	1	1	1	regulation of cell division	0
GO:0051536	0.0435	12	0	0	0	0	iron-sulfur cluster binding	0
GO:0051539	0.0434	3	1	0	0	0	4 iron, 4 sulfur cluster binding	0
GO:0051540	0.0434	12	0	0	0	0	metal cluster binding	0
GO:0051607	0.1215	4	4	4	3	2	defense response to virus	0
GO:0051641	0.0518	19	9	2	0	0	cellular localization	0
GO:0051649	0.0515	17	9	2	0	0	establishment of localization in cell	0
GO:0051674	0.1759	19	16	7	0	0	localization of cell	0
GO:0051701	0.0956	4	0	0	0	0	interaction with host	0
GO:0051704	0.1322	94	42	32	12	6	multi-organism process	0
GO:0051707	0.0641	4	4	3	3	2	response to other organism	0
GO:0051716	0.0521	13	0	0	0	0	cellular response to stimulus	0
GO:0051726	0.2002	2	1	1	1	1	regulation of cell cycle	0
GO:0051806	0.2071	2	1	0	0	0	entry into cell of other organism involved in symbiotic interaction	0
GO:0051828	0.2071	2	1	0	0	0	entry into other organism involved in symbiotic interaction	0
GO:0052126	0.2071	2	1	0	0	0	movement in host environment	0
GO:0052192	0.2071	2	1	0	0	0	movement in environment of other organism involved in symbiotic interaction	0
GO:0052689	0.0543	4	3	1	0	0	carboxylic ester hydrolase activity	0
GO:0052803	0.3266	7	7	7	7	2	imidazole-containing compound metabolic process	0
GO:0055085	0.0625	34	8	5	0	0	transmembrane transport	0
GO:0055086	0.1329	176	37	21	11	6	nucleobase-containing small molecule metabolic process	0
GO:0055114	0.143	434	104	44	25	11	oxidation-reduction process	0
GO:0055129	0.5826	2	0	0	0	0	L-proline biosynthetic process	0
GO:0060089	0.0257	4	0	0	0	0	molecular transducer activity	0
GO:0060255	0.0883	279	0	0	0	0	regulation of macromolecule metabolic process	0
GO:0060491	0.038	1	0	0	0	0	regulation of cell projection assembly	0
GO:0061024	0.0979	5	0	0	0	0	membrane organization	0
GO:0061505	0.1119	2	1	1	0	0	DNA topoisomerase II activity	0
GO:0065003	0.0203	2	0	0	0	0	macromolecular complex assembly	0
GO:0065007	0.1164	815	5	0	0	0	biological regulation	0
GO:0065008	0.0394	9	2	1	0	0	regulation of biological quality	0
GO:0065009	0.031	2	0	0	0	0	regulation of molecular function	0
GO:0070011	0.0323	1	0	0	0	0	peptidase activity, acting on L-amino acid peptides	0
GO:0070035	0.0123	1	1	1	0	0	purine NTP-dependent helicase activity	0
GO:0070271	0.0206	2	0	0	0	0	protein complex biogenesis	0
GO:0070283	0.1043	2	2	2	2	2	radical SAM enzyme activity	0
GO:0070589	0.214	8	0	0	0	0	cellular component macromolecule biosynthetic process	0
GO:0070925	0.0429	1	0	0	0	0	organelle assembly	0
GO:0071103	0.0169	1	1	1	1	1	DNA conformation change	0
GO:0071554	0.0421	9	0	0	0	0	cell wall organization or biogenesis	0
GO:0071702	0.1088	104	44	21	10	9	organic substance transport	0
GO:0071704	0.479	3423	3423	1450	545	196	organic substance metabolic process	0
GO:0071705	0.0252	5	2	2	2	2	nitrogen compound transport	0
GO:0071709	0.1668	5	0	0	0	0	membrane assembly	0
GO:0071822	0.0237	2	0	0	0	0	protein complex subunit organization	0
GO:0071840	0.0933	117	0	0	0	0	cellular component organization or biogenesis	0
GO:0071941	0.2698	10	9	8	2	1	nitrogen cycle metabolic process	0
GO:0071944	0.1415	513	21	0	0	0	cell periphery	0
GO:0072330	0.0454	3	3	3	1	1	monocarboxylic acid biosynthetic process	0
GO:0072348	0.0466	3	3	3	3	3	sulfur compound transport	0
GO:0072509	0.0504	1	0	0	0	0	divalent inorganic cation transmembrane transporter activity	0
GO:0072511	0.0345	1	0	0	0	0	divalent inorganic cation transport	0
GO:0072521	0.0881	78	4	4	3	3	purine-containing compound metabolic process	0
GO:0072522	0.1168	20	13	7	5	2	purine-containing compound biosynthetic process	0
GO:0072523	0.0569	14	0	0	0	0	purine-containing compound catabolic process	0
GO:0072524	0.1234	8	5	0	0	0	pyridine-containing compound metabolic process	0
GO:0072525	0.1469	6	4	2	0	0	pyridine-containing compound biosynthetic process	0
GO:0072527	0.0774	10	0	0	0	0	pyrimidine-containing compound metabolic process	0
GO:0072528	0.0827	8	0	0	0	0	pyrimidine-containing compound biosynthetic process	0
GO:0080090	0.0881	226	0	0	0	0	regulation of primary metabolic process	0
GO:0080109	0.3363	2	0	0	0	0	indole-3-acetonitrile nitrile hydratase activity	0
GO:0090304	0.2095	1369	240	50	1	1	nucleic acid metabolic process	0
GO:0090305	0.0395	4	4	2	1	1	nucleic acid phosphodiester bond hydrolysis	0
GO:0090407	0.1402	93	40	22	14	5	organophosphate biosynthetic process	0
GO:0090482	0.2998	5	4	4	1	1	vitamin transmembrane transporter activity	0
GO:0090529	0.0132	1	1	0	0	0	cell septum assembly	0
GO:0097159	0.3792	2615	2162	590	228	24	organic cyclic compound binding	0
GO:0097367	0.2119	799	195	114	57	10	carbohydrate derivative binding	0
GO:0098542	0.0848	4	4	4	3	2	defense response to other organism	0
GO:1900190	0.1835	1	0	0	0	0	regulation of single-species biofilm formation	0
GO:1901068	0.043	3	0	0	0	0	guanosine-containing compound metabolic process	0
GO:1901069	0.0498	3	0	0	0	0	guanosine-containing compound catabolic process	0
GO:1901135	0.1368	219	40	19	6	3	carbohydrate derivative metabolic process	0
GO:1901136	0.0604	21	0	0	0	0	carbohydrate derivative catabolic process	0
GO:1901137	0.1282	77	31	14	6	5	carbohydrate derivative biosynthetic process	0
GO:1901160	0.095	3	0	0	0	0	primary amino compound metabolic process	0
GO:1901161	0.0791	1	0	0	0	0	primary amino compound catabolic process	0
GO:1901264	0.1094	3	0	0	0	0	carbohydrate derivative transport	0
GO:1901265	0.225	1086	245	133	62	12	nucleoside phosphate binding	0
GO:1901269	0.1658	5	3	2	0	0	lipooligosaccharide metabolic process	0
GO:1901271	0.1658	5	3	2	0	0	lipooligosaccharide biosynthetic process	0
GO:1901292	0.0515	12	0	0	0	0	nucleoside phosphate catabolic process	0
GO:1901293	0.1348	46	28	15	13	6	nucleoside phosphate biosynthetic process	0
GO:1901360	0.2996	1942	839	306	100	4	organic cyclic compound metabolic process	0
GO:1901361	0.0556	30	0	0	0	0	organic cyclic compound catabolic process	0
GO:1901362	0.1616	993	132	72	38	3	organic cyclic compound biosynthetic process	0
GO:1901363	0.3788	2605	2145	588	228	24	heterocyclic compound binding	0
GO:1901476	0.1825	13	12	5	0	0	carbohydrate transporter activity	0
GO:1901564	0.275	738	312	191	77	25	organonitrogen compound metabolic process	0
GO:1901565	0.0716	29	0	0	0	0	organonitrogen compound catabolic process	0
GO:1901566	0.286	272	178	142	72	44	organonitrogen compound biosynthetic process	0
GO:1901575	0.0938	103	8	1	0	0	organic substance catabolic process	0
GO:1901576	0.2979	1703	680	365	196	61	organic substance biosynthetic process	0
GO:1901605	0.2019	88	39	31	21	14	alpha-amino acid metabolic process	0
GO:1901606	0.0547	5	0	0	0	0	alpha-amino acid catabolic process	0
GO:1901607	0.2625	66	37	31	20	14	alpha-amino acid biosynthetic process	0
GO:1901615	0.0635	2	0	0	0	0	organic hydroxy compound metabolic process	0
GO:1901616	0.0481	1	0	0	0	0	organic hydroxy compound catabolic process	0
GO:1901657	0.0932	80	12	5	4	4	glycosyl compound metabolic process	0
GO:1901658	0.06	16	0	0	0	0	glycosyl compound catabolic process	0
GO:1901659	0.1386	27	18	11	5	3	glycosyl compound biosynthetic process	0
GO:1901677	0.2351	3	3	2	0	0	phosphate transmembrane transporter activity	0
GO:1901682	0.2053	3	3	3	3	2	sulfur compound transmembrane transporter activity	0
GO:1902115	0.038	1	0	0	0	0	regulation of organelle assembly	0
GO:1902208	0.038	1	0	0	0	0	regulation of bacterial-type flagellum assembly	0
GO:1902494	0.0219	3	1	1	0	0	catalytic complex	0
GO:1902589	0.0568	4	2	2	2	2	single-organism organelle organization	0
GO:1990204	0.1195	4	1	0	0	0	oxidoreductase complex	0
GO:2000112	0.0843	201	0	0	0	0	regulation of cellular macromolecule biosynthetic process	0
GO:2001057	0.2638	2	1	1	0	0	reactive nitrogen species metabolic process	0
GO:2001141	0.0829	189	0	0	0	0	regulation of RNA biosynthetic process	0
