# Supplementary material for: The evolutionary signal in metagenome phyletic profiles predicts many gene functions
Source: Microbiome. 2018 Jul 10;6:129. doi: 10.1186/s40168-018-0506-4 (PMC6040064; doi:10.1186/s40168-018-0506-4)
Supplement: Supplementary file 5 — Table S5. MPP-I vs. matched PP predictions that validated on CAFA 2 Escherichia coli and Pseudomonas aeruginosa benchmarks. Tables contain annotations with precision scores Pr ≥ 0.5 assigned by MPP-I and their matched PP to benchmark genes and the experimentally verified annotations from the benchmarks. Rows are clustered using the R package Seriation (column “Order”). (XLSX 152 kb) [file 40168_2018_506_MOESM5_ESM.xlsx]

## Sheet: E. coli - MPP-I vs. PP
Order	Function	Information content	acuI (COG:0604) Pr MPP	acuI (COG:0604) Pr PP	acuI (COG:0604) CAFA 2	chbB (COG:1440) Pr MPP	chbB (COG:1440) Pr PP	chbB (COG:1440) CAFA 2	cheR (COG:1352) Pr MPP	cheR (COG:1352) Pr PP	cheR (COG:1352) CAFA 2	citC (COG:3053) Pr MPP	citC (COG:3053) Pr PP	citC (COG:3053) CAFA 2	creB (COG:0745) Pr MPP	creB (COG:0745) Pr PP	creB (COG:0745) CAFA 2	cysZ (COG:2981) Pr MPP	cysZ (COG:2981) Pr PP	cysZ (COG:2981) CAFA 2	flgH (COG:2063) Pr MPP	flgH (COG:2063) Pr PP	flgH (COG:2063) CAFA 2	fliI (COG:1157) Pr MPP	fliI (COG:1157) Pr PP	fliI (COG:1157) CAFA 2	fruA (COG:1299, COG:1445, COG:3925) Pr MPP	fruA (COG:1299, COG:1445, COG:3925) Pr PP	fruA (COG:1299, COG:1445, COG:3925) CAFA 2	fruB (COG:1925, COG:4668) Pr MPP	fruB (COG:1925, COG:4668) Pr PP	fruB (COG:1925, COG:4668) CAFA 2	gatA (COG:1762) Pr MPP	gatA (COG:1762) Pr PP	gatA (COG:1762) CAFA 2	gatB (COG:3414) Pr MPP	gatB (COG:3414) Pr PP	gatB (COG:3414) CAFA 2	glpB (COG:3075) Pr MPP	glpB (COG:3075) Pr PP	glpB (COG:3075) CAFA 2	glpC (COG:0247, COG:3075) Pr MPP	glpC (COG:0247, COG:3075) Pr PP	glpC (COG:0247, COG:3075) CAFA 2	intS (COG:0582) Pr MPP	intS (COG:0582) Pr PP	intS (COG:0582) CAFA 2	moaA (COG:2896) Pr MPP	moaA (COG:2896) Pr PP
1	oxidation-reduction process (GO:55114)	2.98	1	0.5052	0	0	0	0	0	0	0	0	0	0	0	0	0	0	0	0	0	0	0	0	0	0	0	0	0	0	0	0	0	0	0	0	0	0	0	0	0	0.5	0	1	0	0	0	0	0
2	oxidoreductase activity (GO:16491)	3.03	1	0.5137	1	0	0	0	0	0	0	0	0	0	0	0	0	0	0	0	0	0	0	0	0	0	0	0	0	0	0	0	0	0	0	0	0	0	0	0	1	0.5105	0	0	0	0	0	0	0
3	protein metabolic process (GO:19538)	3.3	0	0	0	0	0	0	0	0	0	0	0	1	0	0	0	0	0	0	0	0	0	0	0	0	0	0	0	0	0	0	0	0	0	0	0	0	0	0	0	0	0	0	0	0	0	0	0.6729
4	cellular protein metabolic process (GO:44267)	3.71	0	0	0	0	0	0	0	0	0	0	0	1	0	0	0	0	0	0	0	0	0	0	0	0	0	0	0	0	0	0	0	0	0	0	0	0	0	0	0	0	0	0	0	0	0	0	0.6667
5	ligase activity (GO:16874)	4.71	0	0	0	0	0	0	0	0	0	0	0	1	0	0	0	0	0	0	0	0	0	0	0	0	0	0	0	0	0	0	0	0	0	0	0	0	0	0	0	0	0	0	0	0	0	0	0
6	translation (GO:6412)	4.4	0	0	0	0	0	0	0	0	0	0	0	0	0	0	0	0	0	0	0	0	0	0	0	0	0	0	0	0	0	0	0	0	0	0	0	0	0	0	0	0	0	0	0	0	0	0	0
7	ncRNA metabolic process (GO:34660)	4.99	0	0	0	0	0	0	0	0	0	0	0	0	0	0	0	0	0	0	0	0	0	0	0	0	0	0	0	0	0	0	0	0	0	0	0	0	0	0	0	0	0	0	0	0	0	0	0
8	tRNA metabolic process (GO:6399)	5.32	0	0	0	0	0	0	0	0	0	0	0	0	0	0	0	0	0	0	0	0	0	0	0	0	0	0	0	0	0	0	0	0	0	0	0	0	0	0	0	0	0	0	0	0	0	0	0
9	tRNA aminoacylation for protein translation (GO:6418)	6.55	0	0	0	0	0	0	0	0	0	0	0	0	0	0	0	0	0	0	0	0	0	0	0	0	0	0	0	0	0	0	0	0	0	0	0	0	0	0	0	0	0	0	0	0	0	0	0
10	aminoacyl-tRNA ligase activity (GO:4812)	6.47	0	0	0	0	0	0	0	0	0	0	0	0	0	0	0	0	0	0	0	0	0	0	0	0	0	0	0	0	0	0	0	0	0	0	0	0	0	0	0	0	0	0	0	0	0	0	0
11	tRNA aminoacylation (GO:43039)	6.53	0	0	0	0	0	0	0	0	0	0	0	0	0	0	0	0	0	0	0	0	0	0	0	0	0	0	0	0	0	0	0	0	0	0	0	0	0	0	0	0	0	0	0	0	0	0	0
12	ligase activity, forming carbon-oxygen bonds (GO:16875)	6.45	0	0	0	0	0	0	0	0	0	0	0	0	0	0	0	0	0	0	0	0	0	0	0	0	0	0	0	0	0	0	0	0	0	0	0	0	0	0	0	0	0	0	0	0	0	0	0
13	ligase activity, forming aminoacyl-tRNA and related compounds (GO:16876)	6.45	0	0	0	0	0	0	0	0	0	0	0	0	0	0	0	0	0	0	0	0	0	0	0	0	0	0	0	0	0	0	0	0	0	0	0	0	0	0	0	0	0	0	0	0	0	0	0
14	amino acid activation (GO:43038)	6.53	0	0	0	0	0	0	0	0	0	0	0	0	0	0	0	0	0	0	0	0	0	0	0	0	0	0	0	0	0	0	0	0	0	0	0	0	0	0	0	0	0	0	0	0	0	0	0
15	cytoplasmic part (GO:44444)	4.83	0	0	0	0	0	1	0	0	1	0	0	0	0	0	0	0	0	0	0	0	0	0	0	0	0	0	0	0	0	0	0	0	0	0	0	0	0	0	0	0	0	0	0	0	0	0	0
16	RNA metabolic process (GO:16070)	2.94	0	0	0	0	0	0	0	0	0	0	0	0	0	0	0	0	0	0	0	0	0	0	0	0	0	0	0	0	0	0	0	0	0	0	0	0	0	0	0	0	0	0	0	0	0	0	0
17	gene expression (GO:10467)	2.62	0	0	0	0	0	0	0.5342	0.502	0	0	0	0	0	0	0	0	0	0	0	0	0	0	0	0	0	0	0	0	0	0	0	0	0	0	0	0	0	0	0	0	0	0	0	0.5045	0	0	0
18	macromolecule biosynthetic process (GO:9059)	2.56	0	0	0	0	0	0	0.5198	0.5246	0	0	0	0	0.5443	0.5036	0	0	0	0	0	0	0	0	0	0	0	0	0	0	0	0	0	0	0	0	0	0	0	0	0	0	0	0	0	0.5311	0	0	0
19	cellular macromolecule metabolic process (GO:44260)	1.93	0	0	0	0	0	0	0.6019	0.6622	0	0	0	1	0.7168	0.6154	0	0	0	0	0	0	0	0	0	0	0	0	0	0	0.607	0	0	0	0	0	0	0	0	0	0	0	0	0	0	0.5917	0	0	0.7839
20	macromolecule metabolic process (GO:43170)	1.76	0	0	0	0	0	0	0.6177	0.7123	0	0	0	1	0.75	0.6058	0	0	0	0	0	0	0	0	0	0	0	0	0	0	0.6401	0	0	0	0	0	0	0	0	0	0	0	0	0	0	0.5823	0	0	0.7799
21	nucleobase-containing compound metabolic process (GO:6139)	1.87	0	0	0	0	0	0	0.54	0	0	0	0	0	0.7474	0	0	0	0	0	0	0	0	0	0	0	0	0	0	0	0.5379	0	0	0	0	0	0	0	0	0	0	0	0	0	0	0	0	0	0
22	cellular nitrogen compound metabolic process (GO:34641)	1.69	0	0	0	0	0	0	0.5475	0.5145	0	0	0	0	0.7465	0	0	0	0	0	0	0	0	0	0	0	0	0	0	0	0.5622	0	0	0	0	0	0	0	0	0	0	0	0	0	0	0	0	0.6338	0
23	heterocycle metabolic process (GO:46483)	1.69	0	0	0	0	0	0	0.5412	0.5138	0	0	0	0	0.7273	0	0	0	0	0	0	0	0	0	0	0	0	0	0	0	0.5625	0	0	0	0	0	0	0	0	0	0	0	0.5427	0	0	0	0	0.652	0.8101
24	cellular aromatic compound metabolic process (GO:6725)	1.7	0	0	0	0	0	0	0.5402	0.5042	0	0	0	0	0.7584	0	0	0	0	0	0	0	0	0	0	0	0	0	0	0	0.5703	0	0	0	0	0	0	0	0	0	0	0	0	0	0	0	0	0.6575	0
25	cytoplasm (GO:5737)	2.72	0	0	0	0	0	1	0	0	1	0	0.562	0	0	0	0	0	0	0	0	0	0	0	0	0	0	0	0	0	0.5096	0	0	0	0	0	0	0	0	0	0	0	0	0	0	0	0	0.5365	0
26	intracellular part (GO:44424)	2.57	0	0	0	0	0	1	0	0.638	1	0	0.5826	0	0	0	0	0	0	0	0.7175	0.7627	0	0.5907	0.7706	0	0	0	0	0	0.5865	0	0	0	0	0	0	0	0	0	0	0	0	0	0	0	0	0.5596	0
27	intracellular (GO:5622)	2.48	0	0	0	0	0	1	0	0.6759	1	0	0.5793	0	0	0	0	0	0	0	0.6907	0.7654	0	0.5841	0.7798	0	0	0	0	0	0.6184	0	0	0	0	0	0	0	0	0	0	0	0	0	0	0	0	0.5744	0
28	cell part (GO:44464)	1.89	0	0	0	0.6569	0	1	0	0.7034	1	0	0.6972	0	0	0	0	0	0.5942	1	0.8229	0.8333	0	0.6639	0.7742	0	0.6452	0.6364	0	0.602	0.6605	1	0.5967	0.5533	0	0.611	0	0	0	0.5994	1	0	0.5994	1	0	0	0	0.5767	0
29	cell (GO:5623)	1.89	0	0	0	0.6569	0	1	0	0.7034	1	0	0.6972	0	0	0	0	0	0.5942	1	0.8229	0.8333	0	0.6639	0.7742	0	0.6452	0.6364	0	0.602	0.6605	1	0.5967	0.5533	0	0.611	0	0	0	0.5994	1	0	0.5994	1	0	0	0	0.5767	0
30	membrane (GO:16020)	2.27	0	0	0	0.6667	0	0	0	0	1	0	0	0	0	0	0	0.5403	0.5642	1	0	0	0	0.5337	0.6267	0	1	0.6111	0	0.6548	0.5899	1	0.5799	0.5262	0	0.7778	0	0	0	0.5582	1	0	0.5582	1	0	0	0	0	0
31	plasma membrane (GO:5886)	3.7	0	0	0	0.5532	0	0	0	0	1	0	0	0	0	0	0	0	0	1	0	0	0	0	0	0	0.75	0	0	0	0	1	0	0	0	0.6154	0	0	0	0	1	0	0	1	0	0	0	0	0
32	membrane part (GO:44425)	2.87	0	0	0	0.6786	0	0	0	0	0	0	0	0	0	0	0	0	0	1	0	0	0	0	0	0	0.6667	0.5375	0	0.542	0	1	0	0	0	0.6667	0	0	0	0	0	0	0	0	0	0	0	0	0
33	integral component of membrane (GO:16021)	2.95	0	0	0	0.6786	0	0	0	0	0	0	0	0	0	0	0	0	0	1	0	0	0	0	0	0	0.6667	0.5143	0	0.5391	0	0	0	0	0	0.7	0	0	0	0	0	0	0	0	0	0	0	0	0
34	intrinsic component of membrane (GO:31224)	2.94	0	0	0	0.6786	0	0	0	0	0	0	0	0	0	0	0	0	0	1	0	0	0	0	0	0	0.6667	0.5143	0	0.5391	0	0	0	0	0	0.7	0	0	0	0	0	0	0	0	0	0	0	0	0
35	ion transmembrane transporter activity (GO:15075)	4.65	0	0	0	0.6667	0	0	0	0	0	0	0	0	0	0	0	0	0	1	0	0	0	0	0	0	0.75	0.7917	0	0	0.7059	0	0	0	0	0.5625	0	0	0	0	0	0	0	0	0	0	0	0	0
36	cation transmembrane transporter activity (GO:8324)	5.13	0	0	0	0.6	0	0	0	0	0	0	0	0	0	0	0	0	0	1	0	0	0	0	0	0	0.6154	0.8182	0	0	0.7407	0	0	0	0	0.5882	0	0	0	0	0	0	0	0	0	0	0	0	0
37	solute:cation symporter activity (GO:15294)	6.95	0	0	0	0.5556	0	0	0	0	0	0	0	0	0	0	0	0	0	1	0	0	0	0	0	0	0.6364	0.6667	0	0	0.75	0	0	0	0	0.6154	0	0	0	0	0	0	0	0	0	0	0	0	0
38	symporter activity (GO:15293)	6.84	0	0	0	0.5556	0	0	0	0	0	0	0	0	0	0	0	0	0	1	0	0	0	0	0	0	0.6364	0.6667	0	0	0.75	0	0	0	0	0.6154	0	0	0	0	0	0	0	0	0	0	0	0	0
39	solute:hydrogen symporter activity (GO:15295)	7.61	0	0	0	0.5	0	0	0	0	0	0	0	0	0	0	0	0	0	1	0	0	0	0	0	0	0.6154	0.6667	0	0	0.75	0	0	0	0	0.5833	0	0	0	0	0	0	0	0	0	0	0	0	0
40	secondary active transmembrane transporter activity (GO:15291)	6.1	0	0	0	0.5	0	0	0	0	0	0	0	0	0	0	0	0	0	1	0	0	0	0	0	0	0.6364	0.5714	0	0	0.75	0	0	0	0	0.5714	0	0	0	0	0	0	0	0	0	0	0	0	0
41	ion transport (GO:6811)	4.63	0	0	0	0.5098	0	0	0	0	0	0	0	0	0	0	0	0	0	1	0	0	0	0	0	0	0.625	0	0	0	0	0	0	0	0	0	0	0	0	0	0	0	0	0	0	0	0	0	0
42	metal ion transport (GO:30001)	6.33	0	0	0	0	0	0	0	0	0	0	0	0	0	0	0	0	0.5	0	0	0	0	0	0	0	0	0	0	0	0	0	0	0	0	0	0	0	0	0	0	0	0	0	0	0	0	0	0
43	response to external stimulus (GO:9605)	6.56	0	0	0	0	0	0	0	0	0	0	0	0	0	0	0	0	0	0	0	0	0	0	0	0	0	0	0	0	0	0	0	0	0	0	0	0	0	0	0	0	0	0	0	0	0	0	0
44	cellular response to extracellular stimulus (GO:31668)	7.73	0	0	0	0	0	0	0	0	0	0	0	0	0	0	0	0	0	0	0	0	0	0	0	0	0	0	0	0	0	0	0	0	0	0	0	0	0	0	0	0	0	0	0	0	0	0	0
45	response to extracellular stimulus (GO:9991)	7.73	0	0	0	0	0	0	0	0	0	0	0	0	0	0	0	0	0	0	0	0	0	0	0	0	0	0	0	0	0	0	0	0	0	0	0	0	0	0	0	0	0	0	0	0	0	0	0
46	cellular response to external stimulus (GO:71496)	7.73	0	0	0	0	0	0	0	0	0	0	0	0	0	0	0	0	0	0	0	0	0	0	0	0	0	0	0	0	0	0	0	0	0	0	0	0	0	0	0	0	0	0	0	0	0	0	0
47	endonuclease activity (GO:4519)	6.36	0	0	0	0	0	0	0	0	0	0	0	0	0	0	0	0	0	0	0	0	0	0	0	0	0	0	0	0	0	0	0	0	0	0	0	0	0	0	0	0	0	0	0	0	0	0	0
48	hydrolase activity, acting on ester bonds (GO:16788)	4.47	0	0	0	0	0	0	0	0	0	0	0	0	0	0	0	0	0	0	0	0	0	0	0	0	0	0	0	0	0	0	0	0	0	0	0	0	0	0	0	0	0	0	0	0	0	0	0
49	hydrolase activity, acting on acid anhydrides (GO:16817)	3.56	0	0	0	0	0	0	0	0	0	0	0	0	0	0	0	0	0	0	0	0.5745	0	0.5094	0.6429	0	0	0	0	0	0	0	0	0	0	0	0	0	0	0	0	0	0	0	0	0	0	0	0
50	hydrolase activity, acting on acid anhydrides, in phosphorus-containing anhydrides (GO:16818)	3.56	0	0	0	0	0	0	0	0	0	0	0	0	0	0	0	0	0	0	0	0.5745	0	0.5094	0.6429	0	0	0	0	0	0	0	0	0	0	0	0	0	0	0	0	0	0	0	0	0	0	0	0
51	hydrolase activity (GO:16787)	2.21	0	0	0	0	0	0	0	0	0	0	0	0	0	0	0	0	0	0	0.5693	0.5252	0	0.5888	0.619	0	0	0	0	0	0	0	0	0	0	0	0	0	0	0	0	0	0	0	0	0	0	0	0
52	pyrophosphatase activity (GO:16462)	3.57	0	0	0	0	0	0	0	0	0	0	0	0	0	0	0	0	0	0	0	0.5625	0	0.5094	0.6429	0	0	0	0	0	0	0	0	0	0	0	0	0	0	0	0	0	0	0	0	0	0	0	0
53	nuclease activity (GO:4518)	5.47	0	0	0	0	0	0	0	0	0	0	0	0	0	0	0	0	0	0	0	0	0	0	0	0	0	0	0	0	0	0	0	0	0	0	0	0	0	0	0	0	0	0	0	0	0	0	0
54	protein complex (GO:43234)	5.27	0	0	0	0	0	0	0	0	0	0	0.5135	0	0	0	0	0	0	0	0	0	0	0	0	0	0	0	0	0	0	0	0	0	0	0	0	0	0	0	0	0	0	0	0	0	0	0	0
55	macromolecular complex (GO:32991)	4.22	0	0	0	0	0	0	0	0	0	0	0	0	0	0	0	0	0	0	0	0	0	0	0	0	0	0	0	0	0	0	0	0	0	0	0	0	0	0	0	0	0	0	0	0	0	0	0
56	multi-organism process (GO:51704)	7.54	0	0	0	0	0	0	0	0	0	0	0	0	0	0	0	0	0	0	0	0	0	0	0	0	0.5714	0	0	0	0	0	0	0	0	0	0	0	0	0	0	0	0	0	0	0	1	0	0
57	sugar transmembrane transporter activity (GO:51119)	7.37	0	0	0	0.5	0	0	0	0	0	0	0	0	0	0	0	0	0	0	0	0	0	0	0	0	0.6154	0.6667	1	0	0.7	1	0	0	0	0.5833	0	0	0	0	0	0	0	0	0	0	0	0	0
58	carbohydrate transport (GO:8643)	6.46	0	0	0	0.75	0	1	0	0	0	0	0	0	0	0	0	0	0	0	0	0	0	0	0	0	0.7857	0.9286	1	0	0.85	1	0	0	1	0.8	0.7143	1	0	0	0	0	0	0	0	0	0	0	0
59	phosphoenolpyruvate-dependent sugar phosphotransferase system (GO:9401)	7.05	0	0	0	0.75	0	1	0	0	0	0	0	0	0	0	0	0	0	0	0	0	0	0	0	0	0.7692	0.9412	1	0	0.9444	1	0	0	1	0.8	0.8696	1	0	0	0	0	0	0	0	0	0	0	0
60	establishment of localization (GO:51234)	2.73	0	0	0	1	0	1	0	0	0	0	0	0	0	0	0	0	0.5953	1	0	0	0	0.6939	0.8514	0	1	0.8571	1	0.8169	0.7407	1	0	0.5936	1	1	0.6348	1	0	0	0	0	0	0	0	0	0	0	0
61	localization (GO:51179)	2.69	0	0	0	0.92	0	1	0	0	0	0	0	0	0	0	0	0	0.6138	1	0.9318	1	0	0.9394	1	0	1	0.8684	1	0.8421	0.7615	1	0.5111	0.6091	1	0.9	0.6537	1	0	0	0	0	0	0	0	0	0	0	0
62	transport (GO:6810)	2.74	0	0	0	1	0	1	0	0	0	0	0	0	0	0	0	0	0.5801	1	0	0	0	0.6923	0.8493	0	1	0.8571	1	0.8143	0.7297	1	0	0.6	1	1	0.6474	1	0	0	0	0	0	0	0	0	0	0	0
63	transporter activity (GO:5215)	3.15	0	0	0	1	0	0	0	0	0	0	0	0	0	0	0	0	0.5396	1	0	0	0	0	0	0	1	0.6939	1	0.6582	0.6833	1	0	0.5138	1	1	0	1	0	0	0	0	0	0	0	0	0	0	0
64	transmembrane transporter activity (GO:22857)	4	0	0	0	0.8	0	0	0	0	0	0	0	0	0	0	0	0	0	1	0	0	0	0	0	0	0.7778	0.7353	1	0	0.7045	1	0	0	1	0.75	0	1	0	0	0	0	0	0	0	0	0	0	0
65	active transmembrane transporter activity (GO:22804)	4.81	0	0	0	0.6667	0	0	0	0	0	0	0	0	0	0	0	0	0	1	0	0	0	0	0	0	0.7273	0.72	1	0	0.7647	1	0	0	1	0.6429	0	1	0	0	0	0	0	0	0	0	0	0	0
66	substrate-specific transmembrane transporter activity (GO:22891)	4.39	0	0	0	0.7778	0	0	0	0	0	0	0	0	0	0	0	0	0	1	0	0	0	0	0	0	0.8333	0.7586	1	0	0.675	1	0	0	1	0.75	0	1	0	0	0	0	0	0	0	0	0	0	0
67	substrate-specific transporter activity (GO:22892)	4.22	0	0	0	0.7778	0	0	0	0	0	0	0	0	0	0	0	0	0	1	0	0	0	0	0	0	0.8333	0.7586	1	0	0.6585	1	0	0	1	0.75	0	1	0	0	0	0	0	0	0	0	0	0	0
68	carbohydrate transmembrane transporter activity (GO:15144)	6.83	0	0	0	0.75	0	0	0	0	0	0	0	0	0	0	0	0	0	0	0	0	0	0	0	0	0.8	0.7	1	0	0.625	1	0	0	1	0.75	0	1	0	0	0	0	0	0	0	0	0	0	0
69	protein-N(PI)-phosphohistidine-sugar phosphotransferase activity (GO:8982)	7.78	0	0	0	0.5714	0	0	0	0	0	0	0	0	0	0	0	0	0	0	0	0	0	0	0	0	0.6364	0.5294	1	0	0	1	0	0	1	0.6	0	1	0	0	0	0	0	0	0	0	0	0	0
70	phosphotransferase activity, alcohol group as acceptor (GO:16773)	4.82	0	0	0	0	0	0	0	0	0	0	0	0	0	0	0	0	0	0	0	0	0	0	0	0	0.6154	0.6667	1	0	0	1	0	0	1	0.5625	0	1	0	0	0	0	0	0	0	0	0	0	0
71	transferase activity, transferring phosphorus-containing groups (GO:16772)	3.75	0	0	0	0	0	0	0	0	0	0	0	0	0	0	0	0	0	0	0	0	0	0	0	0	0.5833	0.75	1	0	0	1	0	0	1	0	0	1	0	0	0	0	0	0	0	0	0	0	0
72	carbohydrate metabolic process (GO:5975)	4.13	0	0	0	0	0	0	0	0	0	0	0	0	0	0	0	0	0	0	0	0	0	0	0	0	0	0.625	0	0	0	0	0	0	0	0	0	0	0	0	0	0	0	0	0	0	0	0	0
73	catabolic process (GO:9056)	3.63	0	0	0	0	0	0	0	0	0	0	0	0	0.5	0	0	0	0	0	0	0	0	0	0	0	0	0	0	0	0	0	0	0	0	0	0	0	0	0	0	0	0	0	0	0	0	0	0
74	cellular catabolic process (GO:44248)	3.96	0	0	0	0	0	0	0	0	0	0	0	0	0.5	0	0	0	0	0	0	0	0	0	0	0	0	0	0	0	0	0	0	0	0	0	0	0	0	0	0	0	0	0	0	0	0	0	0
75	coenzyme metabolic process (GO:6732)	5.09	0	0	0	0	0	0	0	0	0	0	0.5362	0	0	0	0	0	0	0	0	0	0	0	0	0	0	0	0	0	0	0	0	0	0	0	0	0	0	0	0	0	0.6111	0	0	0	0	0	1
76	cofactor metabolic process (GO:51186)	4.73	0	0	0	0	0	0	0	0	0	0	0.7308	0	0	0	0	0	0	0	0	0	0	0	0	0	0	0	0	0	0	0	0	0	0	0	0	0	0	0	0	0	0.6286	0	0	0	0	0	1
77	cofactor biosynthetic process (GO:51188)	5.09	0	0	0	0	0	0	0	0	0	0	0	0	0	0	0	0	0	0	0	0	0	0	0	0	0	0	0	0	0	0	0	0	0	0	0	0	0	0	0	0	0.6923	0	0	0	0	0	1
78	coenzyme biosynthetic process (GO:9108)	5.46	0	0	0	0	0	0	0	0	0	0	0	0	0	0	0	0	0	0	0	0	0	0	0	0	0	0	0	0	0	0	0	0	0	0	0	0	0	0	0	0	0.7037	0	0	0	0	0	1
79	chorismate metabolic process (GO:46417)	8.14	0	0	0	0	0	0	0	0	0	0	0	0	0	0	0	0	0	0	0	0	0	0	0	0	0	0	0	0	0	0	0	0	0	0	0	0	0	0	0	0	0	0	0	0	0	0	0
80	dicarboxylic acid metabolic process (GO:43648)	6.38	0	0	0	0	0	0	0	0	0	0	0	0	0	0	0	0	0	0	0	0	0	0	0	0	0	0	0	0	0	0	0	0	0	0	0	0	0	0	0	0	0	0	0	0	0	0	0
81	carboxylic acid biosynthetic process (GO:46394)	4.33	0	0	0	0	0	0	0	0	0	0	0	0	0	0	0	0	0	1	0	0	0	0	0	0	0	0	0	0	0	0	0	0	0	0	0	0	0	0	0	0	0	0	0	0	0	0.557	0
82	organic acid biosynthetic process (GO:16053)	4.32	0	0	0	0	0	0	0	0	0	0	0	0	0	0	0	0	0	1	0	0	0	0	0	0	0	0	0	0	0	0	0	0	0	0	0	0	0	0	0	0	0	0	0	0	0	0.557	0
83	cellular amino acid biosynthetic process (GO:8652)	4.64	0	0	0	0	0	0	0	0	0	0	0	0	0	0	0	0	0	1	0	0	0	0	0	0	0	0	0	0	0	0	0	0	0	0	0	0	0	0	0	0	0	0	0	0	0	0.5139	0
84	cellular amino acid metabolic process (GO:6520)	3.9	0	0	0	0	0	0	0	0	0	0	0	0	0	0	0	0	0	1	0	0	0	0	0	0	0	0	0	0	0	0	0	0	0	0	0	0	0	0	0	0	0	0	0	0	0	0.5833	0
85	carboxylic acid metabolic process (GO:19752)	3.5	0	0	0	0	0	0	0	0	0	0	0	0	0	0	0	0	0	1	0	0	0	0	0	0	0	0	0	0	0	0	0	0	0	0	0	0	0	0	0	0	0	0	0	0	0	0.6786	0
86	oxoacid metabolic process (GO:43436)	3.48	0	0	0	0	0	0	0	0	0	0	0	0	0	0	0	0	0	1	0	0	0	0	0	0	0	0	0	0	0	0	0	0	0	0	0	0	0	0	0	0	0	0	0	0	0	0.6909	0
87	organic acid metabolic process (GO:6082)	3.46	0	0	0	0	0	0	0	0	0	0	0	0	0	0	0	0	0	1	0	0	0	0	0	0	0	0	0	0	0	0	0	0	0	0	0	0	0	0	0	0	0	0	0	0	0	0.6909	0
88	cellular biosynthetic process (GO:44249)	1.82	0	0	0	0	0	0	0.5716	0.5302	0	0	0	0	0	0.531	0	0	0	1	0	0	0	0	0	0	0	0	0	0	0.551	0	0	0	0	0	0	0	0	0	0	0	0.6653	0	0	0.5346	0	0.7814	0.8744
89	biosynthetic process (GO:9058)	1.71	0	0	0	0	0	0	0.5737	0.5411	0	0	0	0	0	0.5754	0	0	0	1	0	0	0	0	0	0	0	0	0	0	0.5513	0	0	0	0	0	0	0	0	0	0	0	0.6846	0	0	0.5435	0	0.7899	0.8687
90	nitrogen compound metabolic process (GO:6807)	1.47	0	0	0	0	0	0	0.5661	0.5636	0	0	0	0	0.8037	0	0	0	0	1	0	0	0	0	0	0	0.5382	0	0	0	0.6089	0	0	0	0	0	0	0	0	0	0	0	0.5934	0	0.5275	0	0	0.8014	0.8722
91	primary metabolic process (GO:44238)	1.07	0	0.5123	0	0	0	0	0.6481	0.6848	0	0	0	1	0.8672	0.6245	0	0	0	1	0	0	0	0	0	0	0	0.508	0	0.5321	0.7818	0	0.5664	0.5472	0	0	0.5513	0	0	0	0	0	0.6228	0	0.5545	0.603	0	0.8333	0.8399
92	cellular metabolic process (GO:44237)	1	0	0.5405	0	0	0	0	0.7451	0.6725	0	0.5447	0.6131	1	0.9041	0.6418	0	0.5349	0	1	0	0	0	0	0	0	0.5669	0.5676	0	0	0.8037	0	0.5596	0.5509	0	0	0.5363	0	0	0	0	0	0.7553	1	0.6277	0.6367	0	0.9088	0.8819
93	cellular process (GO:9987)	0.79	0	0.5838	0	0	0.5294	1	0.865	0.8864	0	0.5773	0.6254	1	0.9242	0.685	0	0.653	0.5412	1	0.7918	0.8902	0	0.8703	1	0	0.6612	0.6234	0	0.5611	0.8272	0	0.6552	0.6359	0	0.504	0.6068	0	0.5274	0.5576	0	0.5459	0.7692	1	0.7057	0.7246	1	0.9384	0.8664
94	metabolic process (GO:8152)	0.52	0.9253	0.8294	0	0.6152	0.6719	0	0.8105	0.7535	0	0.7095	0.7392	1	0.9238	0.7984	0	0.7178	0.6444	1	0.6269	0.6134	0	0.6441	0.6092	0	0.6788	0.7048	0	0.7415	0.8777	0	0.7517	0.7327	0	0.6118	0.6942	0	0.6847	0.7035	0	0.8586	0.8806	1	0.7208	0.7764	0	0.9388	0.9276
95	catalytic activity (GO:3824)	0.64	0.9859	0.8513	1	0.6946	0.7051	0	0.8709	0.7709	0	0.8341	0.8806	1	0.9376	0.7463	0	0.7335	0.6888	0	0.772	0.6808	0	0.832	0.7069	0	0.7208	0.8039	1	0.772	0.8032	1	0.7673	0.7639	1	0.6818	0.6908	1	0.7617	0.6759	1	0.9026	0.8805	0	0.753	0.7136	0	0.9516	0.6835
96	binding (GO:5488)	1.03	0.6087	0	0	0	0	0	0.6338	0	0	0.5654	0	1	0.9403	0.6324	1	0	0	0	0	0	0	0	0	1	0.5421	0	0	0.5839	0.6313	0	0.5248	0.5119	0	0	0	0	0.5375	0	0	0.582	0.5586	1	0.5947	0.5494	1	0.6576	0
97	ion binding (GO:43167)	1.75	0.5222	0	0	0	0	0	0	0	0	0	0	0	0.8298	0	0	0	0	0	0	0	0	0	0	0	0	0	0	0	0	0	0	0	0	0	0	0	0	0	0	0	0	1	0	0	0	0.5595	0
98	anion binding (GO:43168)	2.3	0	0	0	0	0	0	0	0	0	0	0	0	0.7917	0	0	0	0	0	0	0	0	0	0	0	0	0	0	0	0	0	0	0	0	0	0	0	0	0	0	0	0	0	0	0	0	0	0
99	nucleotide binding (GO:166)	2.33	0	0	0	0	0	0	0	0	0	0	0	0	0.7857	0	0	0	0	0	0	0	0	0	0	0	0	0	0	0	0	0	0	0	0	0	0	0	0	0	0	0	0	0	0	0	0	0	0
100	ribonucleotide binding (GO:32553)	2.65	0	0	0	0	0	0	0	0	0	0	0	0	0.7778	0	0	0	0	0	0	0	0	0	0	0	0	0	0	0	0	0	0	0	0	0	0	0	0	0	0	0	0	0	0	0	0	0	0
101	purine nucleotide binding (GO:17076)	2.67	0	0	0	0	0	0	0	0	0	0	0	0	0.8077	0	0	0	0	0	0	0	0	0	0	0	0	0	0	0	0	0	0	0	0	0	0	0	0	0	0	0	0	0	0	0	0	0	0
102	purine ribonucleotide binding (GO:32555)	2.71	0	0	0	0	0	0	0	0	0	0	0	0	0.8077	0	0	0	0	0	0	0	0	0	0	0	0	0	0	0	0	0	0	0	0	0	0	0	0	0	0	0	0	0	0	0	0	0	0
103	purine ribonucleoside binding (GO:32550)	2.72	0	0	0	0	0	0	0	0	0	0	0	0	0.8077	0	0	0	0	0	0	0	0	0	0	0	0	0	0	0	0	0	0	0	0	0	0	0	0	0	0	0	0	0	0	0	0	0	0
104	nucleoside binding (GO:1882)	2.71	0	0	0	0	0	0	0	0	0	0	0	0	0.8571	0	0	0	0	0	0	0	0	0	0	0	0	0	0	0	0	0	0	0	0	0	0	0	0	0	0	0	0	0	0	0	0	0	0
105	ribonucleoside binding (GO:32549)	2.71	0	0	0	0	0	0	0	0	0	0	0	0	0.8571	0	0	0	0	0	0	0	0	0	0	0	0	0	0	0	0	0	0	0	0	0	0	0	0	0	0	0	0	0	0	0	0	0	0
106	adenyl nucleotide binding (GO:30554)	2.79	0	0	0	0	0	0	0	0	0	0	0	0	0.85	0	0	0	0	0	0	0	0	0	0	0	0	0	0	0	0	0	0	0	0	0	0	0	0	0	0	0	0	0	0	0	0	0	0
107	adenyl ribonucleotide binding (GO:32559)	2.83	0	0	0	0	0	0	0	0	0	0	0	0	0.8333	0	0	0	0	0	0	0	0	0	0	0	0	0	0	0	0	0	0	0	0	0	0	0	0	0	0	0	0	0	0	0	0	0	0
108	ATP binding (GO:5524)	2.83	0	0	0	0	0	0	0	0	0	0	0	0	0.8333	0	0	0	0	0	0	0	0	0	0	0	0	0	0	0	0	0	0	0	0	0	0	0	0	0	0	0	0	0	0	0	0	0	0
109	nucleic acid binding (GO:3676)	2.38	0	0	0	0	0	0	0	0	0	0	0	0	0.619	0	0	0	0	0	0	0	0	0	0	0	0	0	0	0	0	0	0	0	0	0	0	0	0	0	0	0	0	0	0	0	1	0	0
110	DNA binding (GO:3677)	2.96	0	0	0	0	0	0	0	0	0	0	0	0	0.6667	0	0	0	0	0	0	0	0	0	0	0	0	0	0	0	0	0	0	0	0	0	0	0	0	0	0	0	0	0	0	0	1	0	0
111	response to stress (GO:6950)	4.83	0	0	0	0	0	0	0	0	0	0	0	0	0	0	0	0	0	0	0	0	1	0	0	0	0	0	0	0	0	0	0	0	0	0	0	0	0	0	0	0	0	0	0	0	0	0	0
112	response to stimulus (GO:50896)	3.58	0	0	0	0	0	0	0.8571	0.5	0	0	0	0	0.7222	0	0	0	0	0	0	0	1	0	0.5	0	0	0	0	0	0	0	0	0	0	0	0	0	0	0	0	0	0	0	0	0	0	0	0
113	locomotion (GO:40011)	6.78	0	0	0	0	0	0	0.6818	0.5556	0	0	0	0	0	0	0	0	0	0	0.8333	0.5714	0	0.7333	0.7	0	0	0	0	0	0	0	0	0	0	0	0	0	0	0	0	0	0	0	0	0	0	0	0
114	signal transducer activity (GO:4871)	4.81	0	0	0	0	0	0	0.8571	0	0	0	0	0	0.5938	0	0	0	0	0	0	0	0	0	0	0	0	0	0	0	0	0	0	0	0	0	0	0	0	0	0	0	0	0	0	0	0	0	0
115	molecular transducer activity (GO:60089)	4.8	0	0	0	0	0	0	0.8571	0	0	0	0	0	0.5938	0	0	0	0	0	0	0	0	0	0	0	0	0	0	0	0	0	0	0	0	0	0	0	0	0	0	0	0	0	0	0	0	0	0
116	biological regulation (GO:65007)	2.86	0	0	0	0	0	0	0.8182	0.75	0	0	0	0	0.5851	0	0	0	0	0	0	0	0	0	0	0	0	0	0	0	0	0	0	0	0	0	0	0	0	0	0	0	0	0	0	0	0	0	0
117	regulation of biological process (GO:50789)	2.89	0	0	0	0	0	0	0.8182	0.75	0	0	0	0	0.6	0	0	0	0	0	0	0	0	0	0	0	0	0	0	0	0	0	0	0	0	0	0	0	0	0	0	0	0	0	0	0.5077	0	0	0
118	regulation of cellular process (GO:50794)	2.94	0	0	0	0	0	0	0.8182	0.75	0	0	0	0	0.6279	0	0	0	0	0	0	0	0	0	0	0	0	0	0	0	0	0	0	0	0	0	0	0	0	0	0	0	0	0	0	0.5	0	0	0
119	cellular response to stimulus (GO:51716)	3.99	0	0	0	0	0	0	0.9	0.75	0	0	0	0	0.6579	0	0	0	0	0	0	0	0	0	0	0	0	0	0	0	0	0	0	0	0	0	0	0	0	0	0	0	0	0	0	0	0	0	0
120	cell communication (GO:7154)	4.48	0	0	0	0	0	0	0.8571	0	0	0	0	0	0.6875	0	0	0	0	0	0	0	0	0	0	0	0	0	0	0	0	0	0	0	0	0	0	0	0	0	0	0	0	0	0	0	0	0	0
121	signal transduction (GO:7165)	4.64	0	0	0	0	0	0	0.875	0	0	0	0	0	0.625	0	0	0	0	0	0	0	0	0	0	0	0	0	0	0	0	0	0	0	0	0	0	0	0	0	0	0	0	0	0	0	0	0	0
122	regulation of metabolic process (GO:19222)	3.34	0	0	0	0	0	0	0.5	0	0	0	0	0	0	0	0	0	0	0	0	0	0	0	0	0	0	0	0	0	0	0	0	0	0	0	0	0	0	0	0	0	0	0	0	0	0	0	0
123	regulation of transcription, DNA-templated (GO:6355)	3.52	0	0	0	0	0	0	0	0	0	0	0	0	0	0	0	0	0	0	0	0	0	0	0	0	0	0	0	0	0	0	0	0	0	0	0	0	0	0	0	0	0	0	0	0	0	0	0
124	regulation of biosynthetic process (GO:9889)	3.44	0	0	0	0	0	0	0	0	0	0	0	0	0	0	0	0	0	0	0	0	0	0	0	0	0	0	0	0	0	0	0	0	0	0	0	0	0	0	0	0	0	0	0	0	0	0	0
125	regulation of cellular metabolic process (GO:31323)	3.41	0	0	0	0	0	0	0	0	0	0	0	0	0	0	0	0	0	0	0	0	0	0	0	0	0	0	0	0	0	0	0	0	0	0	0	0	0	0	0	0	0	0	0	0	0	0	0
126	regulation of RNA metabolic process (GO:51252)	3.52	0	0	0	0	0	0	0	0	0	0	0	0	0	0	0	0	0	0	0	0	0	0	0	0	0	0	0	0	0	0	0	0	0	0	0	0	0	0	0	0	0	0	0	0	0	0	0
127	regulation of gene expression (GO:10468)	3.4	0	0	0	0	0	0	0	0	0	0	0	0	0	0	0	0	0	0	0	0	0	0	0	0	0	0	0	0	0	0	0	0	0	0	0	0	0	0	0	0	0	0	0	0	0	0	0
128	regulation of cellular biosynthetic process (GO:31326)	3.44	0	0	0	0	0	0	0	0	0	0	0	0	0	0	0	0	0	0	0	0	0	0	0	0	0	0	0	0	0	0	0	0	0	0	0	0	0	0	0	0	0	0	0	0	0	0	0
129	regulation of nucleobase-containing compound metabolic process (GO:19219)	3.5	0	0	0	0	0	0	0	0	0	0	0	0	0	0	0	0	0	0	0	0	0	0	0	0	0	0	0	0	0	0	0	0	0	0	0	0	0	0	0	0	0	0	0	0	0	0	0
130	regulation of macromolecule metabolic process (GO:60255)	3.38	0	0	0	0	0	0	0	0	0	0	0	0	0	0	0	0	0	0	0	0	0	0	0	0	0	0	0	0	0	0	0	0	0	0	0	0	0	0	0	0	0	0	0	0	0	0	0
131	regulation of macromolecule biosynthetic process (GO:10556)	3.44	0	0	0	0	0	0	0	0	0	0	0	0	0	0	0	0	0	0	0	0	0	0	0	0	0	0	0	0	0	0	0	0	0	0	0	0	0	0	0	0	0	0	0	0	0	0	0
132	regulation of nitrogen compound metabolic process (GO:51171)	3.5	0	0	0	0	0	0	0	0	0	0	0	0	0	0	0	0	0	0	0	0	0	0	0	0	0	0	0	0	0	0	0	0	0	0	0	0	0	0	0	0	0	0	0	0	0	0	0
[truncated: 112 more columns]

## Sheet: P. aeruginosa - MPP-I vs. PP
Order	Function	Information content	PA0148 (COG:1816) Pr MPP	PA0148 (COG:1816) Pr PP	PA0148 (COG:1816) CAFA 2	PA2621 (COG:2127) Pr MPP	PA2621 (COG:2127) Pr PP	PA2621 (COG:2127) CAFA 2	PA2827 (COG:0229) Pr MPP	PA2827 (COG:0229) Pr PP	PA2827 (COG:0229) CAFA 2	PA5078 (COG:3131) Pr MPP	PA5078 (COG:3131) Pr PP	PA5078 (COG:3131) CAFA 2	aceA (COG:2224) Pr MPP	aceA (COG:2224) Pr PP	aceA (COG:2224) CAFA 2	ampC (COG:1680) Pr MPP	ampC (COG:1680) Pr PP	ampC (COG:1680) CAFA 2	aprA (COG:2931) Pr MPP	aprA (COG:2931) Pr PP	aprA (COG:2931) CAFA 2	ccmC (COG:0755) Pr MPP	ccmC (COG:0755) Pr PP	ccmC (COG:0755) CAFA 2	ccmF (COG:1138) Pr MPP	ccmF (COG:1138) Pr PP	ccmF (COG:1138) CAFA 2	cdhR (COG:4977) Pr MPP	cdhR (COG:4977) Pr PP	cdhR (COG:4977) CAFA 2	clpP (COG:0740) Pr MPP	clpP (COG:0740) Pr PP	clpP (COG:0740) CAFA 2	cueR (COG:0789) Pr MPP	cueR (COG:0789) Pr PP	cueR (COG:0789) CAFA 2	cynT (COG:0288) Pr MPP	cynT (COG:0288) Pr PP	cynT (COG:0288) CAFA 2	cysH (COG:0175) Pr MPP	cysH (COG:0175) Pr PP	cysH (COG:0175) CAFA 2	dctA (COG:1301) Pr MPP	dctA (COG:1301) Pr PP	dctA (COG:1301) CAFA 2	dsbB (COG:1495) Pr MPP	dsbB (COG:1495) Pr PP
1	cellular glucan metabolic process (GO:6073)	8.99	0	0	0	0	0	0	0	0	0	0	1	1	0	0	0	0	0	0	0	0	0	0	0	0	0	0	0	0	0	0	0	0	0	0	0	0	0	0	0	0	0	0	0	0	0	0	0
2	glucan metabolic process (GO:44042)	8.99	0	0	0	0	0	0	0	0	0	0	1	1	0	0	0	0	0	0	0	0	0	0	0	0	0	0	0	0	0	0	0	0	0	0	0	0	0	0	0	0	0	0	0	0	0	0	0
3	glucan biosynthetic process (GO:9250)	9.52	0	0	0	0	0	0	0	0	0	0	1	1	0	0	0	0	0	0	0	0	0	0	0	0	0	0	0	0	0	0	0	0	0	0	0	0	0	0	0	0	0	0	0	0	0	0	0
4	cellular aldehyde metabolic process (GO:6081)	8.17	0	0	0	0	0	0	0	0	0	0	0	0	0	0.5	0	0	0	0	0	0	0	0	0	0	0	0	0	0	0	0	0	0	0	0	0	0	0	0	0	0	0	0	0	0	0	0	0
5	DNA metabolic process (GO:6259)	4.19	0	0	0	0	0	0	0	0	0	0	0	0	0	0	0	0	0	0	0	0	0	0	0	0	0	0	0	0	0	0	0	0	0	0	0	0	0	0	0	0	0	0	0	0	0	0	0
6	carboxylic acid metabolic process (GO:19752)	3.5	0	0	0	0	0	0	0	0	0	0	0	0	0	0	0	0	0	0	0	0	0	0.617	0	0	0	0	0	0	0	0	0	0	0	0	0	0	0	0	0	0	0	0	0	0	0	0	0
7	oxoacid metabolic process (GO:43436)	3.48	0	0	0	0	0	0	0	0	0	0	0	0	0	0	0	0	0	0	0	0	0	0.6143	0	0	0	0	0	0	0	0	0	0	0	0	0	0	0	0	0	0	0	0	0	0	0	0	0
8	organic acid metabolic process (GO:6082)	3.46	0	0	0	0	0	0	0	0	0	0	0	0	0	0	0	0	0	0	0	0	0	0.6143	0	0	0	0	0	0	0	0	0	0	0	0	0	0	0	0	0	0	0	0	0	0	0	0	0
9	oxidoreductase activity (GO:16491)	3.03	0	0	0	0	0	0	0	0	0	0	0	0	0.6308	0	0	0	0	0	0	0	0	0	0	1	0.516	0	1	0	0.6173	0	0	0	0	0	0	0	0	0	0	0	0.5	1	0	0	0	0	0
10	oxidation-reduction process (GO:55114)	2.98	0	0	0	0	0.5115	0	0	0	0	0	0	0	0.625	0.5606	0	0	0	0	0	0	0	0	0.5423	1	0.5025	0	1	0	0	0	0	0	0	0	0	0	0	0	0	0	0.5267	0	0	0	0	0	0
11	CoA-ligase activity (GO:16405)	9.62	0	0	0	0	0	0	0	0	0	0	0	0	0	0	0	0	0	0	0	0	0	0	0	0	0	0	0	0	0	0	0	0	0	0	0	0	0	0	0	0	0	0	0	0	0	0	0
12	succinate-CoA ligase (ADP-forming) activity (GO:4775)	10.53	0	0	0	0	0	0	0	0	0	0	0	0	0	0	0	0	0	0	0	0	0	0	0	0	0	0	0	0	0	0	0	0	0	0	0	0	0	0	0	0	0	0	0	0	0	0	0
13	succinate-CoA ligase activity (GO:4774)	10.53	0	0	0	0	0	0	0	0	0	0	0	0	0	0	0	0	0	0	0	0	0	0	0	0	0	0	0	0	0	0	0	0	0	0	0	0	0	0	0	0	0	0	0	0	0	0	0
14	ligase activity, forming carbon-sulfur bonds (GO:16877)	8.88	0	0	0	0	0	0	0	0	0	0	0	0	0	0	0	0	0	0	0	0	0	0	0	0	0	0	0	0	0	0	0	0	0	0	0	0	0	0	0	0	0	0	0	0	0	0	0
15	acid-thiol ligase activity (GO:16878)	9.1	0	0	0	0	0	0	0	0	0	0	0	0	0	0	0	0	0	0	0	0	0	0	0	0	0	0	0	0	0	0	0	0	0	0	0	0	0	0	0	0	0	0	0	0	0	0	0
16	nucleoside triphosphate biosynthetic process (GO:9142)	7.21	0	0	0	0	0	0	0	0	0	0	0	0	0	0	0	0	0	0	0	0	0	0	0	0	0	0	0	0	0	0	0	0	0	0	0	0	0	0	0	0	0	0	0	0	0	0	0
17	ligase activity (GO:16874)	4.71	0	0	0	0	0	0	0	0	0	0	0	0	0	0	0	0	0	0	0	0	0	0	0	0	0	0	0	0	0	0	0	0	0	0	0	0	0	0	0	0	0	0	0	0	0	0	0
18	nucleotide biosynthetic process (GO:9165)	4.88	0	0	0	0	0	0	0	0	0	0	0	0	0	0	0	0	0	0	0	0	0	0	0	0	0	0	0	0	0	0	0	0	0	0	0	0	0	0	0	0	0	0	0	0	0	0	0
19	nucleobase-containing compound biosynthetic process (GO:34654)	2.97	0	0	0	0	0	0	0	0	0	0	0	0	0	0	0	0	0	0	0	0	0	0	0	0	0	0	0	0.8333	0	0	0	0	0	0	0	0	0	0	0	0	0	0	0	0	0	0	0
20	cellular nitrogen compound biosynthetic process (GO:44271)	2.67	0	0	0	0	0	0	0	0	0	0	0	0	0	0	0	0	0	0	0	0	0	0.5966	0	1	0	0	1	0.7714	0	0	0	0	0	0	0	0	0	0	0	0	0	0	0	0	0	0	0
21	aromatic compound biosynthetic process (GO:19438)	2.69	0	0	0	0	0	0	0	0	0	0	0	0	0	0	0	0	0	0	0	0	0	0.5243	0	0	0	0	0	0.6875	0	0	0	0	0	0	0	0	0	0	0	0	0	0	0	0	0	0	0
22	heterocycle biosynthetic process (GO:18130)	2.63	0	0	0	0	0	0	0	0	0	0	0	0	0	0	0	0	0	0	0	0	0	0.6232	0	0	0	0	0	0.7344	0	0	0	0	0	0	0.524	0	0	0	0	0	0	0	0	0	0	0	0
23	organophosphate metabolic process (GO:19637)	3.24	0	0	0	0	0	0	0	0	0	0	0	0	0	0	0	0	0	0	0	0	0	0	0	0	0	0	0	0	0	0	0	0	0	0	0.5143	0	0	0	0	0	0	0	0	0	0	0	0
24	phosphorus metabolic process (GO:6793)	2.75	0	0	0	0	0	0	0	0	0	0	0	0	0	0	0	0	0	0	0	0	0	0	0	0	0	0	0	0	0	0	0	0	0	0	0.5031	0	0	0	0	0	0	0	0	0	0	0	0
25	phosphate-containing compound metabolic process (GO:6796)	2.77	0	0	0	0	0	0	0	0	0	0	0	0	0	0	0	0	0	0	0	0	0	0	0	0	0	0	0	0	0	0	0	0	0	0	0	0	0	0	0	0	0	0	0	0	0	0	0
26	nucleotide metabolic process (GO:9117)	3.55	0	0	0	0	0	0	0	0	0	0	0	0	0	0	0	0	0	0	0	0	0	0	0	0	0	0	0	0	0	0	0	0	0	0	0	0	0	0	0	0	0	0	0	0	0	0	0
27	nucleoside phosphate metabolic process (GO:6753)	3.55	0	0	0	0	0	0	0	0	0	0	0	0	0	0	0	0	0	0	0	0	0	0	0	0	0	0	0	0	0	0	0	0	0	0	0	0	0	0	0	0	0	0	0	0	0	0	0
28	nucleobase-containing small molecule metabolic process (GO:55086)	3.4	0	0	0	0	0	0	0	0	0	0	0	0	0	0	0	0	0	0	0	0	0	0	0	0	0	0	0	0	0	0	0	0	0	0	0	0	0	0	0	0	0	0	0	0	0	0	0
29	nucleoside triphosphate metabolic process (GO:9141)	4.36	0	0	0	0	0	0	0	0	0	0	0	0	0	0	0	0	0	0	0	0	0	0	0	0	0	0	0	0	0	0	0	0	0	0	0	0	0	0	0	0	0	0	0	0	0	0	0
30	purine nucleotide catabolic process (GO:6195)	4.6	0	0	0	0	0	0	0	0	0	0	0	0	0	0	0	0	0	0	0	0	0	0	0	0	0	0	0	0	0	0	0	0	0	0	0	0	0	0	0	0	0	0	0	0	0	0	0
31	ribonucleotide metabolic process (GO:9259)	4.02	0	0	0	0	0	0	0	0	0	0	0	0	0	0	0	0	0	0	0	0	0	0	0	0	0	0	0	0	0	0	0	0	0	0	0	0	0	0	0	0	0	0	0	0	0	0	0
32	cellular nitrogen compound catabolic process (GO:44270)	4.34	0	0	0	0	0	0	0	0	0	0	0	0	0	0	0	0	0	0	0	0	0	0	0	0	0	0	0	0	0	0	0	0	0	0	0	0	0	0	0	0	0	0	0	0	0	0	0
33	ribonucleoside triphosphate metabolic process (GO:9199)	4.42	0	0	0	0	0	0	0	0	0	0	0	0	0	0	0	0	0	0	0	0	0	0	0	0	0	0	0	0	0	0	0	0	0	0	0	0	0	0	0	0	0	0	0	0	0	0	0
34	aromatic compound catabolic process (GO:19439)	4.31	0	0	0	0	0	0	0	0	0	0	0	0	0	0	0	0	0	0	0	0	0	0	0	0	0	0	0	0	0	0	0	0	0	0	0	0	0	0	0	0	0	0	0	0	0	0	0
35	nucleoside triphosphate catabolic process (GO:9143)	4.6	0	0	0	0	0	0	0	0	0	0	0	0	0	0	0	0	0	0	0	0	0	0	0	0	0	0	0	0	0	0	0	0	0	0	0	0	0	0	0	0	0	0	0	0	0	0	0
36	purine ribonucleoside catabolic process (GO:46130)	4.62	0	0	0	0	0	0	0	0	0	0	0	0	0	0	0	0	0	0	0	0	0	0	0	0	0	0	0	0	0	0	0	0	0	0	0	0	0	0	0	0	0	0	0	0	0	0	0
37	nucleotide catabolic process (GO:9166)	4.56	0	0	0	0	0	0	0	0	0	0	0	0	0	0	0	0	0	0	0	0	0	0	0	0	0	0	0	0	0	0	0	0	0	0	0	0	0	0	0	0	0	0	0	0	0	0	0
38	ATP metabolic process (GO:46034)	4.75	0	0	0	0	0	0	0	0	0	0	0	0	0	0	0	0	0	0	0	0	0	0	0	0	0	0	0	0	0	0	0	0	0	0	0	0	0	0	0	0	0	0	0	0	0	0	0
39	purine ribonucleotide metabolic process (GO:9150)	4.15	0	0	0	0	0	0	0	0	0	0	0	0	0	0	0	0	0	0	0	0	0	0	0	0	0	0	0	0	0	0	0	0	0	0	0	0	0	0	0	0	0	0	0	0	0	0	0
40	purine nucleotide metabolic process (GO:6163)	4.1	0	0	0	0	0	0	0	0	0	0	0	0	0	0	0	0	0	0	0	0	0	0	0	0	0	0	0	0	0	0	0	0	0	0	0	0	0	0	0	0	0	0	0	0	0	0	0
41	ATP catabolic process (GO:6200)	4.92	0	0	0	0	0	0	0	0	0	0	0	0	0	0	0	0	0	0	0	0	0	0	0	0	0	0	0	0	0	0	0	0	0	0	0	0	0	0	0	0	0	0	0	0	0	0	0
42	ribose phosphate metabolic process (GO:19693)	4.01	0	0	0	0	0	0	0	0	0	0	0	0	0	0	0	0	0	0	0	0	0	0	0	0	0	0	0	0	0	0	0	0	0	0	0	0	0	0	0	0	0	0	0	0	0	0	0
43	ribonucleotide catabolic process (GO:9261)	4.62	0	0	0	0	0	0	0	0	0	0	0	0	0	0	0	0	0	0	0	0	0	0	0	0	0	0	0	0	0	0	0	0	0	0	0	0	0	0	0	0	0	0	0	0	0	0	0
44	ribonucleoside metabolic process (GO:9119)	4.02	0	0	0	0	0	0	0	0	0	0	0	0	0	0	0	0	0	0	0	0	0	0	0	0	0	0	0	0	0	0	0	0	0	0	0	0	0	0	0	0	0	0	0	0	0	0	0
45	ribonucleoside triphosphate catabolic process (GO:9203)	4.62	0	0	0	0	0	0	0	0	0	0	0	0	0	0	0	0	0	0	0	0	0	0	0	0	0	0	0	0	0	0	0	0	0	0	0	0	0	0	0	0	0	0	0	0	0	0	0
46	purine nucleoside metabolic process (GO:42278)	4.19	0	0	0	0	0	0	0	0	0	0	0	0	0	0	0	0	0	0	0	0	0	0	0	0	0	0	0	0	0	0	0	0	0	0	0	0	0	0	0	0	0	0	0	0	0	0	0
47	purine nucleoside triphosphate catabolic process (GO:9146)	4.62	0	0	0	0	0	0	0	0	0	0	0	0	0	0	0	0	0	0	0	0	0	0	0	0	0	0	0	0	0	0	0	0	0	0	0	0	0	0	0	0	0	0	0	0	0	0	0
48	purine nucleoside catabolic process (GO:6152)	4.62	0	0	0	0	0	0	0	0	0	0	0	0	0	0	0	0	0	0	0	0	0	0	0	0	0	0	0	0	0	0	0	0	0	0	0	0	0	0	0	0	0	0	0	0	0	0	0
49	nucleobase-containing compound catabolic process (GO:34655)	4.41	0	0	0	0	0	0	0	0	0	0	0	0	0	0	0	0	0	0	0	0	0	0	0	0	0	0	0	0	0	0	0	0	0	0	0	0	0	0	0	0	0	0	0	0	0	0	0
50	ribonucleoside catabolic process (GO:42454)	4.61	0	0	0	0	0	0	0	0	0	0	0	0	0	0	0	0	0	0	0	0	0	0	0	0	0	0	0	0	0	0	0	0	0	0	0	0	0	0	0	0	0	0	0	0	0	0	0
51	nucleoside metabolic process (GO:9116)	3.94	0	0	0	0	0	0	0	0	0	0	0	0	0	0	0	0	0	0	0	0	0	0	0	0	0	0	0	0	0	0	0	0	0	0	0	0	0	0	0	0	0	0	0	0	0	0	0
52	purine ribonucleoside triphosphate metabolic process (GO:9205)	4.46	0	0	0	0	0	0	0	0	0	0	0	0	0	0	0	0	0	0	0	0	0	0	0	0	0	0	0	0	0	0	0	0	0	0	0	0	0	0	0	0	0	0	0	0	0	0	0
53	purine ribonucleotide catabolic process (GO:9154)	4.62	0	0	0	0	0	0	0	0	0	0	0	0	0	0	0	0	0	0	0	0	0	0	0	0	0	0	0	0	0	0	0	0	0	0	0	0	0	0	0	0	0	0	0	0	0	0	0
54	purine ribonucleoside triphosphate catabolic process (GO:9207)	4.62	0	0	0	0	0	0	0	0	0	0	0	0	0	0	0	0	0	0	0	0	0	0	0	0	0	0	0	0	0	0	0	0	0	0	0	0	0	0	0	0	0	0	0	0	0	0	0
55	purine nucleoside triphosphate metabolic process (GO:9144)	4.46	0	0	0	0	0	0	0	0	0	0	0	0	0	0	0	0	0	0	0	0	0	0	0	0	0	0	0	0	0	0	0	0	0	0	0	0	0	0	0	0	0	0	0	0	0	0	0
56	ATPase activity (GO:16887)	4.19	0	0	0	0	0	0	0	0	0	0	0	0	0	0	0	0	0	0	0	0	0	0	0	0	0	0	0	0	0	0	0	0	0	0	0	0	0	0	0	0	0	0	0	0	0	0	0
57	organophosphate catabolic process (GO:46434)	4.49	0	0	0	0	0	0	0	0	0	0	0	0	0	0	0	0	0	0	0	0	0	0	0	0	0	0	0	0	0	0	0	0	0	0	0	0	0	0	0	0	0	0	0	0	0	0	0
58	catabolic process (GO:9056)	3.63	0	0	0	0	0	0	0	0	0	0	0	0	0	0	0	0	0	0	0	0	0	0	0	0	0	0	0	0	0	0	0	0	0	0	0	0	0	0	0	0	0	0	0	0	0	0	0
59	hydrolase activity (GO:16787)	2.21	0	0	1	0	0	0	0	0	0	0	0	0	0	0	0	0.5385	0	0	0	0	1	0	0	0	0	0	0	0	0	0	0	0	0	0	0	0	0	0	0	0	0	0	0	0	0	0	0
60	cellular catabolic process (GO:44248)	3.96	0	0	0	0	0	0	0	0	0	0	0	0	0	0	0	0	0	0	0	0	0	0	0	0	0	0	0	0	0	0	0	0	0	0	0	0	0	0	0	0	0	0	0	0	0	0	0
61	heterocycle catabolic process (GO:46700)	4.34	0	0	0	0	0	0	0	0	0	0	0	0	0	0	0	0	0	0	0	0	0	0	0	0	0	0	0	0	0	0	0	0	0	0	0	0	0	0	0	0	0	0	0	0	0	0	0
62	nucleoside catabolic process (GO:9164)	4.6	0	0	0	0	0	0	0	0	0	0	0	0	0	0	0	0	0	0	0	0	0	0	0	0	0	0	0	0	0	0	0	0	0	0	0	0	0	0	0	0	0	0	0	0	0	0	0
63	purine ribonucleoside metabolic process (GO:46128)	4.2	0	0	0	0	0	0	0	0	0	0	0	0	0	0	0	0	0	0	0	0	0	0	0	0	0	0	0	0	0	0	0	0	0	0	0	0	0	0	0	0	0	0	0	0	0	0	0
64	pyrophosphatase activity (GO:16462)	3.57	0	0	0	0	0	0	0	0	0	0	0	0	0	0	0	0	0	0	0	0	0	0	0	0	0	0	0	0	0	0	0	0	0	0	0	0	0	0	0	0	0	0	0	0	0	0	0
65	nucleoside-triphosphatase activity (GO:17111)	3.64	0	0	0	0	0	0	0	0	0	0	0	0	0	0	0	0	0	0	0	0	0	0	0	0	0	0	0	0	0	0	0	0	0	0	0	0	0	0	0	0	0	0	0	0	0	0	0
66	hydrolase activity, acting on acid anhydrides, in phosphorus-containing anhydrides (GO:16818)	3.56	0	0	0	0	0	0	0	0	0	0	0	0	0	0	0	0	0	0	0	0	0	0	0	0	0	0	0	0	0	0	0	0	0	0	0	0	0	0	0	0	0	0	0	0	0	0	0
67	hydrolase activity, acting on acid anhydrides (GO:16817)	3.56	0	0	0	0	0	0	0	0	0	0	0	0	0	0	0	0	0	0	0	0	0	0	0	0	0	0	0	0	0	0	0	0	0	0	0	0	0	0	0	0	0	0	0	0	0	0	0
68	anion transport (GO:6820)	5.71	0	0	0	0	0	0	0	0	0	0	0	0	0	0	0	0	0	0	0	0	0	0	0	0	0	0	0	0	0	0	0	0	0	0	0	0	0	0	0	0	0	0	0	0	1	0	0.5294
69	ion transport (GO:6811)	4.63	0	0	0	0	0	0	0	0	0	0	0	0	0	0	0	0	0	0	0	0	0	0	0	0	0	0	0	0	0	0	0	0	0	0	0	0	0	0	0	0	0	0	0	0	1	0	0.7143
70	establishment of localization (GO:51234)	2.73	0	0	0	0	0	0	0	0	0	0	0	0	0	0	0	0	0	0	0	0	0	0	0	0	0	0.61	0	0	0	0	0	0	0	0	0	0	0	0	0	0	0	0	0	0	1	0	0.814
71	transport (GO:6810)	2.74	0	0	0	0	0	0	0	0	0	0	0	0	0	0	0	0	0	0	0	0	0	0	0	0	0	0.6029	0	0	0	0	0	0	0	0	0	0	0	0	0	0	0	0	0	0	1	0	0.7576
72	localization (GO:51179)	2.69	0	0	0	0	0	1	0	0	0	0.5344	0	0	0	0	0	0	0	0	0	0	0	0	0	1	0	0.618	1	0	0	0	0	0	1	0	0	0	0	0	0	0	0	0	0	0	1	0	0.835
73	cofactor biosynthetic process (GO:51188)	5.09	0	0	0	0	0	0	0	0	0	0	0	0	0	0	0	0	0	0	0	0	0	0.5	0.6	1	0	0	1	0	0	0	0	0	0	0	0	0	0	0	0	0	0	0	0	0	0	0	0
74	cofactor metabolic process (GO:51186)	4.73	0	0	0	0	0	0	0	0	0	0	0	0	0	0	0	0	0	0	0	0	0	0.5	0.5571	1	0	0	1	0	0	0	0	0	0	0	0	0	0	0	0	0	0	0	0	0	0	0	0
75	membrane lipid metabolic process (GO:6643)	8.41	0	0	0	0	0	0	0	0	0	0	0	0	0	0	0	0	0	0	0	0	0	0	0	1	0	0	0	0	0	0	0	0	0	0	0	0	0	0	0	0	0	0	0	0	0	0	0
76	membrane lipid biosynthetic process (GO:46467)	8.52	0	0	0	0	0	0	0	0	0	0	0	0	0	0	0	0	0	0	0	0	0	0	0	1	0	0	0	0	0	0	0	0	0	0	0	0	0	0	0	0	0	0	0	0	0	0	0
77	glycolipid biosynthetic process (GO:9247)	8.53	0	0	0	0	0	0	0	0	0	0	0	0	0	0	0	0	0	0	0	0	0	0	0	1	0	0	0	0	0	0	0	0	0	0	0	0	0	0	0	0	0	0	0	0	0	0	0
78	glycolipid metabolic process (GO:6664)	8.48	0	0	0	0	0	0	0	0	0	0	0	0	0	0	0	0	0	0	0	0	0	0	0	1	0	0	0	0	0	0	0	0	0	0	0	0	0	0	0	0	0	0	0	0	0	0	0
79	oligosaccharide metabolic process (GO:9311)	7.75	0	0	0	0	0	0	0	0	0	0	0	0	0	0	0	0	0	0	0	0	0	0	0	0	0	0	0	0	0	0	0	0	0	0	0	0	0	0	0	0	0	0	0	0	0	0	0
80	oligosaccharide biosynthetic process (GO:9312)	8.03	0	0	0	0	0	0	0	0	0	0	0	0	0	0	0	0	0	0	0	0	0	0	0	0	0	0	0	0	0	0	0	0	0	0	0	0	0	0	0	0	0	0	0	0	0	0	0
81	lipid biosynthetic process (GO:8610)	5.51	0	0	0	0	0	0	0	0	0	0	0	0	0	0	0	0	0	0	0	0	0	0	0	1	0	0	0	0	0	0	0	0	0	0	0	0	0	0	0	0	0	0	0	0	0	0	0
82	lipid metabolic process (GO:6629)	5.09	0	0	0	0	0	0	0	0	0	0	0	0	0	0	0	0	0	0	0	0	0	0	0	1	0	0	0	0	0	0	0	0	0	0	0	0	0	0	0	0	0	0	0	0	0	0	0
83	cellular lipid metabolic process (GO:44255)	5.3	0	0	0	0	0	0	0	0	0	0	0	0	0	0	0	0	0	0	0	0	0	0	0	1	0	0	0	0	0	0	0	0	0	0	0	0	0	0	0	0	0	0	0	0	0	0	0
84	carbohydrate metabolic process (GO:5975)	4.13	0	0	0	0	0	0	0	0	0	0	0.7059	1	0	0	0	0	0	0	0	0	0	0	0	0	0	0	0	0	0	0	0	0	0	0	0	0	0	0	0	0	0	0	0	0	0	0	0
85	carbohydrate biosynthetic process (GO:16051)	6	0	0	0	0	0	0	0	0	0	0	0.6316	1	0	0	0	0	0	0	0	0	0	0	0	0	0	0	0	0	0	0	0	0	0	0	0	0	0	0	0	0	0	0	0	0	0	0	0
86	polysaccharide metabolic process (GO:5976)	6.44	0	0	0	0	0	0	0	0	0	0	0.5714	1	0	0	0	0	0	0	0	0	0	0	0	0	0	0	0	0	0	0	0	0	0	0	0	0	0	0	0	0	0	0	0	0	0	0	0
87	polysaccharide biosynthetic process (GO:271)	6.7	0	0	0	0	0	0	0	0	0	0	0.5385	1	0	0	0	0	0	0	0	0	0	0	0	0	0	0	0	0	0	0	0	0	0	0	0	0	0	0	0	0	0	0	0	0	0	0	0
88	macromolecule biosynthetic process (GO:9059)	2.56	0	0	0	0	0	0	0	0	0	0	0.5221	1	0	0	0	0	0	0	0	0	0	0	0	0	0	0	0	0.6918	0	0	0.6264	0.6831	0	0.5372	0	0	0	0	0	0	0	0	0	0	0	0	0
89	macromolecule metabolic process (GO:43170)	1.76	0	0	0	0	0	0	0.5146	0.7067	0	0	0.5554	1	0	0	0	0	0	0	0	0	0	0	0	0	0	0	0	0.6544	0	0	0.7675	0.8861	0	0.5971	0	0	0	0	0	0	0	0	0	0	0	0	0
90	cellular macromolecule metabolic process (GO:44260)	1.93	0	0	0	0	0	0	0	0.6257	0	0	0.559	1	0	0	0	0	0	0	0	0	0	0	0	0	0	0	0	0.7076	0	0	0.7411	0.8404	0	0.5872	0	0	0	0	0	0	0	0	0	0	0	0	0
91	nucleobase-containing compound metabolic process (GO:6139)	1.87	0	0	0	0	0	0	0	0.5573	0	0	0	0	0	0	0	0	0	0	0	0	0	0	0	0	0	0	0	0.6749	0	0	0.6536	0.652	0	0.5288	0	0	0	0	0	0	0	0	0	0	0	0	0
92	cellular nitrogen compound metabolic process (GO:34641)	1.69	0.5045	0	0	0	0	0	0.5135	0.5792	0	0	0	0	0	0	0	0	0	0	0	0	0	0.5913	0	1	0	0	1	0.697	0	0	0.661	0.6765	0	0.5235	0.5712	0	0	0	0	0	0	0	0	0	0	0	0
93	heterocycle metabolic process (GO:46483)	1.69	0.5461	0	0	0	0	0	0.5593	0.6095	0	0	0	0	0	0	0	0	0	0	0	0	0	0.6089	0	0	0	0	0	0.705	0	0	0.6485	0.6798	0	0.5344	0.6573	0	0	0	0	0.5285	0	0	0	0	0	0	0
94	cellular aromatic compound metabolic process (GO:6725)	1.7	0.5271	0	0	0	0	0	0	0.5942	0	0	0	0	0	0	0	0	0	0	0	0	0	0.5901	0	0	0	0	0	0.6879	0	0	0.6406	0.685	0	0.5311	0.5697	0	0	0	0	0.5086	0	0	0	0	0	0	0
95	nitrogen compound metabolic process (GO:6807)	1.47	0.6232	0	0	0	0	0	0.6362	0.6324	0	0	0	0	0	0	0	0	0	0	0	0	0	0.73	0	1	0	0	1	0.7261	0	0	0.7407	0.8144	0	0.5593	0.7429	0	0	0.5348	0	0.6386	0.5284	0	0	0	0	0	0
96	cellular biosynthetic process (GO:44249)	1.82	0	0	0	0	0	0	0.6454	0.5103	0	0	0	1	0	0	0	0	0	0	0	0	0	0.7897	0.5384	1	0.5343	0	1	0.6912	0	0	0.7233	0.7688	0	0.5503	0.6153	0	0	0.531	0	0.5672	0.5767	0	0	0	0	0	0
97	biosynthetic process (GO:9058)	1.71	0.5128	0	0	0	0	0	0.6957	0.5477	0	0	0	1	0.5065	0	0	0	0	0	0	0	0	0.7974	0.5867	1	0.5666	0	1	0.6998	0	0	0.75	0.764	0	0.58	0.6499	0	0	0.5769	0	0.6123	0.6258	0	0	0	0	0	0
98	primary metabolic process (GO:44238)	1.07	0.715	0.5891	0	0	0.5543	0	0.8293	0.8395	0	0.5321	0.5975	1	0.5454	0.5207	0	0.5614	0.559	0	0	0.603	0	0.814	0.5251	1	0.6144	0.5035	0	0.7538	0	0	0.8674	0.8769	0	0.6434	0.797	0	0.5363	0.7439	0	0.7139	0.6343	0	0.634	0.5929	0	0	0
99	cellular metabolic process (GO:44237)	1	0.7686	0.6139	0	0.5569	0.6563	0	0.8557	0.813	0	0.5407	0.6004	1	0.6997	0.5859	0	0	0.5581	0	0	0.6602	0	0.8974	0.6964	1	0.6919	0.5509	1	0.7732	0	0	0.8927	0.9091	0	0.6504	0.8151	0	0.5819	0.6856	0	0.7714	0.7521	1	0.6573	0.6402	0	0.5122	0
100	cellular process (GO:9987)	0.79	0.7727	0.6637	0	0.5932	0.7246	1	0.8922	0.8297	1	0.6452	0.6692	1	0.7437	0.6617	0	0.5028	0.6042	0	0.5882	0.6932	0	0.9339	0.8138	1	0.7481	0.6221	1	0.8284	0.508	0	0.9357	0.9231	1	0.7214	0.8419	0	0.6343	0.7337	0	0.7684	0.7835	1	0.6676	0.744	0	0.6589	0.6285
101	metabolic process (GO:8152)	0.52	0.8932	0.8219	0	0.7102	0.8343	0	0.9232	0.9403	0	0.7512	0.7327	1	0.8503	0.7706	0	0.8688	0.7728	0	0.6824	0.8058	0	0.9268	0.8402	1	0.8844	0.7244	1	0.8604	0.8462	0	0.93	0.9465	0	0.8101	0.8915	0	0.7664	0.857	1	0.8923	0.8966	1	0.8415	0.8126	0	0.6672	0.6512
102	catalytic activity (GO:3824)	0.64	0.9413	0.8824	1	0.7747	0.8866	0	0.9478	0.9567	0	0.8081	0.7136	0	0.8683	0.8407	1	0.9482	0.8493	0	0.7273	0.7952	1	0.9529	0.8564	1	0.9073	0.7269	1	0.7624	0.9198	0	0.846	0.8736	0	0.7609	0.8524	0	0.8776	0.8925	1	0.9545	0.9159	1	0.8774	0.8245	0	0.6798	0.6765
103	binding (GO:5488)	1.03	0.5639	0.5459	0	0.6241	0.6487	0	0.6227	0.6562	0	0	0	0	0.6924	0	0	0.5	0	0	0.5536	0.5348	0	0.651	0.5348	0	0.6339	0.5055	0	0.6712	0.5193	0	0.8715	0.8298	0	0.6477	0.5908	1	0.5408	0.6146	1	0.6834	0.6283	0	0.6296	0.5946	0	0	0
104	ion binding (GO:43167)	1.75	0	0	0	0	0	0	0.5044	0	0	0	0	0	0.5534	0	0	0	0	0	0	0	0	0.5516	0	0	0.5238	0	0	0	0	0	0.6793	0.5532	0	0	0	0	0	0	1	0.5323	0	0	0	0	0	0	0
105	anion binding (GO:43168)	2.3	0	0	0	0	0	0	0	0	0	0	0	0	0	0	0	0	0	0	0	0	0	0	0	0	0	0	0	0	0	0	0.5677	0.6275	0	0	0	0	0	0	0	0	0	0	0	0	0	0	0
106	nucleic acid binding (GO:3676)	2.38	0	0	0	0	0	0	0	0	0	0	0	0	0	0	0	0	0	0	0	0	0	0	0	0	0	0	0	0.5887	0	0	0.5385	0.555	0	0.5315	0	1	0	0	0	0	0	0	0	0	0	0	0
107	gene expression (GO:10467)	2.62	0	0	0	0	0	0	0	0	0	0	0	0	0	0	0	0	0	0	0	0	0	0	0	0	0	0	0	0.7541	0	0	0	0.6211	0	0.5272	0	0	0	0	0	0	0	0	0	0	0	0	0
108	protein metabolic process (GO:19538)	3.3	0	0	0	0	0	0	0	0	0	0	0	0	0	0	0	0	0	0	0	0	0	0	0	0	0	0	0	0	0	0	0.5752	0.5351	0	0	0	0	0	0	0	0	0	0	0	0	0	0	0
109	cellular protein metabolic process (GO:44267)	3.71	0	0	0	0	0	0	0	0	0	0	0	0	0	0	0	0	0	0	0	0	0	0	0	0	0	0	0	0	0	0	0.5333	0.5108	0	0	0	0	0	0	0	0	0	0	0	0	0	0	0
110	translation (GO:6412)	4.4	0	0	0	0	0	0	0	0	0	0	0	0	0	0	0	0	0	0	0	0	0	0	0	0	0	0	0	0	0	0	0	0	0	0	0	0	0	0	0	0	0	0	0	0	0	0	0
111	RNA metabolic process (GO:16070)	2.94	0	0	0	0	0	0	0	0	0	0	0	0	0	0	0	0	0	0	0	0	0	0	0	0	0	0	0	0.6471	0	0	0	0	0	0	0	0	0	0	0	0	0	0	0	0	0	0	0
112	signal transduction (GO:7165)	4.64	0	0	0	0	0	0	0	0	0	0	0	0	0	0	0	0	0	0	0	0	0	0	0	0	0	0	0	0.619	0	0	0	0	0	0	0	0	0	0	0	0	0	0	0	0	0	0	0
113	cell communication (GO:7154)	4.48	0	0	0	0	0	0	0	0	0	0	0	0	0	0	0	0	0	0	0	0	0	0	0	0	0	0	0	0.5652	0	0	0	0	0	0	0	0	0	0	0	0	0	0	0	0	0	0	0
114	DNA binding (GO:3677)	2.96	0	0	0	0	0	0	0	0	0	0	0	0	0	0	0	0	0	0	0	0	0	0	0	0	0	0	0	0.5875	0	0	0	0	0	0	0	1	0	0	0	0	0	0	0	0	0	0	0
115	regulation of cellular metabolic process (GO:31323)	3.41	0	0	0	0	0	0	0	0	0	0	0	0	0	0	0	0	0	0	0	0	0	0	0	0	0	0	0	0.6667	0	0	0	0	0	0	0	1	0	0	0	0	0	0	0	0	0	0	0
116	regulation of macromolecule biosynthetic process (GO:10556)	3.44	0	0	0	0	0	0	0	0	0	0	0	0	0	0	0	0	0	0	0	0	0	0	0	0	0	0	0	0.7143	0	0	0	0	0	0	0	1	0	0	0	0	0	0	0	0	0	0	0
117	regulation of RNA metabolic process (GO:51252)	3.52	0	0	0	0	0	0	0	0	0	0	0	0	0	0	0	0	0	0	0	0	0	0	0	0	0	0	0	0.7778	0	0	0	0	0	0	0	1	0	0	0	0	0	0	0	0	0	0	0
118	regulation of nitrogen compound metabolic process (GO:51171)	3.5	0	0	0	0	0	0	0	0	0	0	0	0	0	0	0	0	0	0	0	0	0	0	0	0	0	0	0	0.7778	0	0	0	0	0	0	0	1	0	0	0	0	0	0	0	0	0	0	0
119	regulation of nucleobase-containing compound metabolic process (GO:19219)	3.5	0	0	0	0	0	0	0	0	0	0	0	0	0	0	0	0	0	0	0	0	0	0	0	0	0	0	0	0.7778	0	0	0	0	0	0	0	1	0	0	0	0	0	0	0	0	0	0	0
120	regulation of transcription, DNA-templated (GO:6355)	3.52	0	0	0	0	0	0	0	0	0	0	0	0	0	0	0	0	0	0	0	0	0	0	0	0	0	0	0	0.7778	0	0	0	0	0	0	0	1	0	0	0	0	0	0	0	0	0	0	0
121	regulation of cellular biosynthetic process (GO:31326)	3.44	0	0	0	0	0	0	0	0	0	0	0	0	0	0	0	0	0	0	0	0	0	0	0	0	0	0	0	0.7143	0	0	0	0	0	0	0	1	0	0	0	0	0	0	0	0	0	0	0
122	regulation of biosynthetic process (GO:9889)	3.44	0	0	0	0	0	0	0	0	0	0	0	0	0	0	0	0	0	0	0	0	0	0	0	0	0	0	0	0.7143	0	0	0	0	0	0	0	1	0	0	0	0	0	0	0	0	0	0	0
123	regulation of gene expression (GO:10468)	3.4	0	0	0	0	0	0	0	0	0	0	0	0	0	0	0	0	0	0	0	0	1	0	0	0	0	0	0	0.7143	0	0	0	0	0	0	0	1	0	0	0	0	0	0	0	0	0	0	0
124	regulation of macromolecule metabolic process (GO:60255)	3.38	0	0	0	0	0	0	0	0	0	0	0	0	0	0	0	0	0	0	0	0	1	0	0	0	0	0	0	0.7143	0	0	0	0	0	0	0	1	0	0	0	0	0	0	0	0	0	0	0
125	regulation of metabolic process (GO:19222)	3.34	0	0	0	0	0	0	0	0	0	0	0	0	0	0	0	0	0	1	0	0	1	0	0	0	0	0	0	0.7143	0	1	0	0	0	0	0	1	0	0	0	0	0	0	0	0	0	0	0
126	biological regulation (GO:65007)	2.86	0	0	0	0	0	0	0	0	0	0	0	0	0	0	1	0	0	1	0	0	1	0	0	0	0	0	0	0.9	0	1	0	0.7333	0	0.6935	0	1	0	0	0	0	0	0	0	0	0	0	0
127	regulation of biological process (GO:50789)	2.89	0	0	0	0	0	0	0	0	0	0	0	0	0	0	1	0	0	1	0	0	1	0	0	0	0	0	0	0.9	0	1	0	0.7333	0	0.6885	0	1	0	0	0	0	0	0	0	0	0	0	0
128	regulation of cellular process (GO:50794)	2.94	0	0	0	0	0	0	0	0	0	0	0	0	0	0	1	0	0	0	0	0	0	0	0	0	0	0	0	0.8947	0	0	0	0.7143	0	0.7213	0	1	0	0	0	0	0	0	0	0	0	0	0
129	cellular response to stimulus (GO:51716)	3.99	0	0	0	0	0	1	0	0	1	0	0	0	0	0	0	0	0	0	0	0	0	0	0	0	0	0	0	0.5345	0	0	0	0	1	0	0	0	0	0	0	0	0	0	0	0	0	0	0
130	response to stimulus (GO:50896)	3.58	0	0	0	0	0	1	0	0	1	0	0	0	0	0	0	0	0	0	0	0	0	0	0	0	0	0	0	0.5422	0	0	0	0	1	0	0	0	0	0	0	0	0	0	0	0	0	0	0
131	response to stress (GO:6950)	4.83	0	0	0	0	0	0	0	0	1	0	0	0	0	0	0	0	0	0	0	0	0	0	0	0	0	0	0	0	0	0	0	0	0	0	0	0	0	0	0	0	0	0	0	0	0	0	0
132	response to oxidative stress (GO:6979)	8.42	0	0	0	0	0	0	0	1	1	0	0	0	0	0	0	0	0	0	0	0	0	0	0	0	0	0	0	0	0	0	0	0	0	0	0	0	0	0	0	0	0	0	0	0	0	0	0
[truncated: 88 more columns]
